# Supplementary material for: A Novel Glycoproteomics Workflow Reveals Dynamic O-GlcNAcylation of COPγ1 as a Candidate Regulator of Protein Trafficking
Source: Front Endocrinol (Lausanne). 2018 Oct 15;9:606. doi: 10.3389/fendo.2018.00606 (PMC6232944; doi:10.3389/fendo.2018.00606)
Supplement: Supplementary file 3 [file Table_3.XLSX]

## Sheet: Legend
Sheet Name	Description
15172 Nuclear	Run 15172, Nuclear Fraction, Biological 1, BFA treated is heavy (intensity 2)
15173 Cytoplasmic	Run 15173, Cytoplasmic Fraction, Biological 1, BFA treated is heavy (intensity 2)
18940 Nuclear	Run 18940, Nuclear Fraction, Biological 2, BFA treated is light (intensity 1)
18939 Cytoplasmic	Run 18939, Cytoplasmic fraction, Biological 2, BFA treated is light (intensity 1)
Nuclear Filtered	Nuclear fraction proteins with concordant BFA-dependent fold changes across replicates, greater than 2 magnitude
Cytoplasmic Filtered	Cytoplasmic fraction proteins with concordant BFA-dependent fold changes across replicates, greater than 1.5 magnitude
Intensity 1 is LIGHT
Intensity 2 is HEAVY

## Sheet: 15172 Nuclear
Primary Protein Name	Protein Description	Fold Change	P-value	Intensity1	Intensity2
FCGR2_MOUSE	Isoform IIB2 of Low affinity immunoglobulin gamma Fc region receptor II OS=Mus musculus GN=Fcgr2	4.165	1.274e-23	331543	1.38085e+06
PON3_MOUSE	Serum paraoxonase/lactonase 3 OS=Mus musculus GN=Pon3 PE=1 SV=2	4.001	2.042e-10	1.71624e+06	5416847
TXD15_MOUSE	Thioredoxin domain-containing protein 15 OS=Mus musculus GN=Txndc15 PE=1 SV=1	3.8	0	3898013	14824044
EXT2_MOUSE	Exostosin-2 OS=Mus musculus GN=Ext2 PE=1 SV=1	3.75	9.796e-35	286491	1.07473e+06
APMAP_MOUSE	Adipocyte plasma membrane-associated protein OS=Mus musculus GN=Apmap PE=1 SV=1	3.557	1.401e-45	3.37619e+06	11853532
TGON1_MOUSE	Trans-Golgi network integral membrane protein 1 OS=Mus musculus GN=Tgoln1 PE=1 SV=1	3.243	0	1.18114e+06	3832754
SUN2_MOUSE	Isoform 2 of SUN domain-containing protein 2 OS=Mus musculus GN=Sun2	3.163	2.101e-15	1.94662e+06	6.21067e+06
FUCT1_MOUSE	GDP-fucose transporter 1 OS=Mus musculus GN=Slc35c1 PE=2 SV=1	3.114	5.185e-44	798523	2.48554e+06
FXYD5_MOUSE	FXYD domain-containing ion transport regulator 5 OS=Mus musculus GN=Fxyd5 PE=1 SV=3	3.067	0	4449444	13645020
LYAG_MOUSE	Lysosomal alpha-glucosidase OS=Mus musculus GN=Gaa PE=1 SV=2	2.911	1.021e-17	1016297	2.96021e+06
PTTG_MOUSE	Pituitary tumor-transforming gene 1 protein-interacting protein OS=Mus musculus GN=Pttg1ip PE=1 SV=1	2.691	1.831e-40	2.80312e+06	7551021
OS9_MOUSE	Protein OS-9 OS=Mus musculus GN=Os9 PE=1 SV=2	2.677	2.158e-06	898269	1935271
RPN2_MOUSE	Dolichyl-diphosphooligosaccharide--protein glycosyltransferase subunit 2 OS=Mus musculus GN=Rpn2 PE=2 SV=1	2.647	1.048e-27	3.57956e+06	9866537
HM13_MOUSE	Isoform 4 of Minor histocompatibility antigen H13 OS=Mus musculus GN=Hm13	2.539	3.709e-26	11949754	31809158
BASI_MOUSE	Basigin OS=Mus musculus GN=Bsg PE=1 SV=2	2.536	1.846e-14	2367026	6.13102e+06
MUC13_MOUSE	Mucin-13 OS=Mus musculus GN=Muc13 PE=2 SV=1	2.518	1.391e-38	1.56424e+06	3.93973e+06
ENTP5_MOUSE	Ectonucleoside triphosphate diphosphohydrolase 5 OS=Mus musculus GN=Entpd5 PE=1 SV=1	2.444	1.302e-23	373506	912950
KCT2_MOUSE	Keratinocyte-associated transmembrane protein 2 OS=Mus musculus GN=Kct2 PE=2 SV=2	2.405	1.541e-44	2.40721e+06	5869678
TM201_MOUSE	Isoform 3 of Transmembrane protein 201 OS=Mus musculus GN=Tmem201	2.403	2.415e-09	2.65652e+06	6.48784e+06
CD63_MOUSE	CD63 antigen OS=Mus musculus GN=Cd63 PE=1 SV=2	2.38	0	26806882	63515628
LYAM1_MOUSE	L-selectin OS=Mus musculus GN=Sell PE=2 SV=1	2.322	8.169e-29	2.42291e+06	5614952
SERC3_MOUSE	Serine incorporator 3 OS=Mus musculus GN=Serinc3 PE=1 SV=2	2.318	3.166e-33	17189384	41033712
S38A2_MOUSE	Sodium-coupled neutral amino acid transporter 2 OS=Mus musculus GN=Slc38a2 PE=1 SV=1	2.264	7.006e-45	8010571	18587368
CRRY_MOUSE	Complement regulatory protein Crry OS=Mus musculus GN=Crry PE=1 SV=1	2.251	1.872e-15	1.24182e+06	2.7989e+06
PCYOX_MOUSE	Prenylcysteine oxidase OS=Mus musculus GN=Pcyox1 PE=1 SV=1	2.23	3.476e-18	2.41919e+06	5.85776e+06
PO210_MOUSE	Nuclear pore membrane glycoprotein 210 OS=Mus musculus GN=Nup210 PE=1 SV=2	2.162	6.674e-17	4.10818e+06	9090940
PCYXL_MOUSE	Prenylcysteine oxidase-like OS=Mus musculus GN=Pcyox1l PE=2 SV=1	2.152	0	14125023	30877522
SYPL1_MOUSE	Synaptophysin-like protein 1 OS=Mus musculus GN=Sypl1 PE=1 SV=2	2.129	0	15142770	32242928
SSRA_MOUSE	Translocon-associated protein subunit alpha OS=Mus musculus GN=Ssr1 PE=1 SV=1	2.083	0	9035163	19118384
TOR1A_MOUSE	Torsin-1A OS=Mus musculus GN=Tor1a PE=2 SV=1	2.069	0.021	99077.4	206337
CD44_MOUSE	Isoform 8 of CD44 antigen OS=Mus musculus GN=Cd44	2.006	2.336e-33	6091620	12609312
NOMO1_MOUSE	Nodal modulator 1 OS=Mus musculus GN=Nomo1 PE=1 SV=1	1.967	3.154e-08	2.29953e+06	4.41911e+06
PXDC2_MOUSE	Plexin domain-containing protein 2 OS=Mus musculus GN=Plxdc2 PE=1 SV=1	1.966	6.491e-32	7.46241e+06	15044946
ITA4_MOUSE	Integrin alpha-4 OS=Mus musculus GN=Itga4 PE=1 SV=1	1.937	0.011	672698	1.57619e+06
ALG6_MOUSE	Dolichyl pyrophosphate Man9GlcNAc2 alpha-1,3-glucosyltransferase OS=Mus musculus GN=Alg6 PE=2 SV=1	1.887	1.407e-23	5158510	9718082
PODXL_MOUSE	Podocalyxin OS=Mus musculus GN=Podxl PE=1 SV=2	1.878	0	4652780	8738937
TTLL1_MOUSE	Probable tubulin polyglutamylase TTLL1 OS=Mus musculus GN=Ttll1 PE=1 SV=1	1.865	4.135e-11	3.06035e+06	5713920
ERG25_MOUSE	C-4 methylsterol oxidase OS=Mus musculus GN=Sc4mol PE=2 SV=1	1.836	8.361e-16	10507177	19050578
S38A1_MOUSE	Sodium-coupled neutral amino acid transporter 1 OS=Mus musculus GN=Slc38a1 PE=1 SV=1	1.819	1.739e-35	5627459	10236790
ITM2B_MOUSE	Integral membrane protein 2B OS=Mus musculus GN=Itm2b PE=2 SV=1	1.802	1.261e-05	6970831	13390411
LAMP2_MOUSE	Isoform LAMP-2B of Lysosome-associated membrane glycoprotein 2 OS=Mus musculus GN=Lamp2	1.802	1.126e-16	2.45205e+06	4634690
S39A4_MOUSE	Zinc transporter ZIP4 OS=Mus musculus GN=Slc39a4 PE=1 SV=1	1.781	1.362e-08	3378824	6.02404e+06
PIGT_MOUSE	GPI transamidase component PIG-T OS=Mus musculus GN=Pigt PE=1 SV=2	1.775	1.297e-08	5739439	10003627
CD47_MOUSE	Isoform 2 of Leukocyte surface antigen CD47 OS=Mus musculus GN=Cd47	1.747	5.898e-33	3286916	5.63e+06
AL5AP_MOUSE	Arachidonate 5-lipoxygenase-activating protein OS=Mus musculus GN=Alox5ap PE=1 SV=2	1.744	2.011e-15	25579612	43488288
ADCL1_MOUSE	Neutral cholesterol ester hydrolase 1 OS=Mus musculus GN=Nceh1 PE=1 SV=1	1.741	1.994e-21	1.89751e+06	3.2803e+06
CRLF2_MOUSE	Isoform 2 of Cytokine receptor-like factor 2 OS=Mus musculus GN=Crlf2	1.717	2.921e-23	3.71031e+06	6376149
SSRB_MOUSE	Translocon-associated protein subunit beta OS=Mus musculus GN=Ssr2 PE=1 SV=1	1.716	0	29900956	51300380
TFR1_MOUSE	Transferrin receptor protein 1 OS=Mus musculus GN=Tfrc PE=1 SV=1	1.698	0	8838957	14904110
ENDD1_MOUSE	Endonuclease domain-containing 1 protein OS=Mus musculus GN=Endod1 PE=1 SV=2	1.697	1.57e-14	1.68048e+06	2922950
LG3BP_MOUSE	Galectin-3-binding protein OS=Mus musculus GN=Lgals3bp PE=1 SV=1	1.689	1.234e-09	3.80599e+06	6447942
ZNF22_MOUSE	Zinc finger protein 22 OS=Mus musculus GN=Znf22 PE=1 SV=2	1.668	7.459e-06	2.77393e+06	4.64356e+06
ADCY8_MOUSE	Adenylate cyclase type 8 OS=Mus musculus GN=Adcy8 PE=2 SV=1	1.667	1.599e-17	1.30084e+06	2168775
T194A_MOUSE	Transmembrane protein 194A OS=Mus musculus GN=Tmem194a PE=1 SV=2	1.657	0.008	4.2715e+06	9443860
SERC1_MOUSE	Serine incorporator 1 OS=Mus musculus GN=Serinc1 PE=1 SV=1	1.654	0	4421131	7135890
VMAT2_MOUSE	Synaptic vesicular amine transporter OS=Mus musculus GN=Slc18a2 PE=1 SV=1	1.651	5.605e-45	14694475	24211224
NCLN_MOUSE	Nicalin OS=Mus musculus GN=Ncln PE=2 SV=2	1.649	3.992e-19	4.75543e+06	8026651
GPR56_MOUSE	G-protein coupled receptor 56 OS=Mus musculus GN=Gpr56 PE=2 SV=1	1.648	8.624e-08	17860674	31400768
CD48_MOUSE	CD48 antigen OS=Mus musculus GN=Cd48 PE=1 SV=1	1.632	2.037e-28	3.20332e+06	5.22853e+06
GTR3_MOUSE	Solute carrier family 2, facilitated glucose transporter member 3 OS=Mus musculus GN=Slc2a3 PE=1 SV=1	1.59	3.269e-06	3.19071e+06	5.24249e+06
ATF7_MOUSE	Cyclic AMP-dependent transcription factor ATF-7 OS=Mus musculus GN=Atf7 PE=1 SV=1	1.544	0.034	1.81956e+06	2.11466e+06
SUN1_MOUSE	Isoform 2 of SUN domain-containing protein 1 OS=Mus musculus GN=Sun1	1.536	6.668e-10	2.06541e+06	3093964
TAF10_MOUSE	Transcription initiation factor TFIID subunit 10 OS=Mus musculus GN=Taf10 PE=1 SV=1	1.517	0.006	2295966	3536837
LY6E_MOUSE	Lymphocyte antigen 6E OS=Mus musculus GN=Ly6e PE=2 SV=2	1.503	9.556e-27	6476344	9737445
LASS2_MOUSE	LAG1 longevity assurance homolog 2 OS=Mus musculus GN=Lass2 PE=1 SV=1	1.501	0.003	14584711	23060966
TMTC3_MOUSE	Transmembrane and TPR repeat-containing protein 3 OS=Mus musculus GN=Tmtc3 PE=2 SV=2	1.492	1.385e-11	807858	1.19834e+06
BST2_MOUSE	Bone marrow stromal antigen 2 OS=Mus musculus GN=Bst2 PE=1 SV=1	1.488	9.609e-28	4990006	7415928
LDLR_MOUSE	Low-density lipoprotein receptor OS=Mus musculus GN=Ldlr PE=1 SV=1	1.484	7.318e-11	1.80046e+06	2599147
SE1L1_MOUSE	Protein sel-1 homolog 1 OS=Mus musculus GN=Sel1l PE=2 SV=2	1.457	0.225	2.1902e+06	3.09138e+06
ZFP62_MOUSE	Isoform 2 of Zinc finger protein 62 OS=Mus musculus GN=Zfp62	1.456	0.023	2.66135e+06	3902468
LMF1_MOUSE	Isoform 2 of Lipase maturation factor 1 OS=Mus musculus GN=Lmf1	1.453	0.01	3433497	4.78749e+06
CENPI_MOUSE	Centromere protein I OS=Mus musculus GN=Cenpi PE=2 SV=1	1.446	0.006	2.244e+06	3231451
HSP13_MOUSE	Heat shock 70 kDa protein 13 OS=Mus musculus GN=Hspa13 PE=2 SV=1	1.44	3.138e-06	3.45414e+06	4.91133e+06
ENPL_MOUSE	Endoplasmin OS=Mus musculus GN=Hsp90b1 PE=1 SV=2	1.437	7.757e-07	5.36249e+06	7393385
ITA2B_MOUSE	Integrin alpha-IIb OS=Mus musculus GN=Itga2b PE=1 SV=1	1.426	0.0002804	1.96589e+06	2792387
TXND5_MOUSE	Thioredoxin domain-containing protein 5 OS=Mus musculus GN=Txndc5 PE=1 SV=2	1.423	0.025	1.67885e+06	1.75767e+06
CTR1_MOUSE	High affinity cationic amino acid transporter 1 OS=Mus musculus GN=Slc7a1 PE=2 SV=1	1.42	3.338e-31	5542455	7.89189e+06
EXOS2_MOUSE	Exosome complex exonuclease RRP4 OS=Mus musculus GN=Exosc2 PE=2 SV=1	1.411	2.741e-06	879666	1.24171e+06
PIGS_MOUSE	GPI transamidase component PIG-S OS=Mus musculus GN=Pigs PE=1 SV=3	1.385	1.596e-06	1.51479e+06	2.13908e+06
4F2_MOUSE	4F2 cell-surface antigen heavy chain OS=Mus musculus GN=Slc3a2 PE=1 SV=1	1.385	4.23e-13	6.61425e+06	9122014
FRRS1_MOUSE	Ferric-chelate reductase 1 OS=Mus musculus GN=FRRS1 PE=1 SV=1	1.368	4.506e-23	4.47134e+06	5983973
CD151_MOUSE	CD151 antigen OS=Mus musculus GN=Cd151 PE=2 SV=2	1.361	0.002	2.59352e+06	3418158
MPRD_MOUSE	Cation-dependent mannose-6-phosphate receptor OS=Mus musculus GN=M6pr PE=1 SV=1	1.338	1.111e-13	6.7359e+06	9165806
GTR1_MOUSE	Solute carrier family 2, facilitated glucose transporter member 1 OS=Mus musculus GN=Slc2a1 PE=1 SV=3	1.337	0.005	4017768	5153542
AURKB_MOUSE	Serine/threonine-protein kinase 12 OS=Mus musculus GN=Aurkb PE=1 SV=1	1.315	0.122	4.58868e+06	5564126
PREP_MOUSE	Isoform 2 of Presequence protease, mitochondrial OS=Mus musculus GN=Pitrm1	1.314	0.016	2.08812e+06	2747031
APC7_MOUSE	Anaphase-promoting complex subunit 7 OS=Mus musculus GN=Anapc7 PE=1 SV=3	1.314	0.039	1.25833e+06	1419601
ELOV6_MOUSE	Elongation of very long chain fatty acids protein 6 OS=Mus musculus GN=Elovl6 PE=2 SV=1	1.313	0.006	1.29624e+06	1.70302e+06
K1468_MOUSE	Isoform 2 of LisH domain and HEAT repeat-containing protein KIAA1468 OS=Mus musculus GN=Kiaa1468	1.312	1.047e-05	2497222	3.27682e+06
CLPT1_MOUSE	Cleft lip and palate transmembrane protein 1 homolog OS=Mus musculus GN=Clptm1 PE=1 SV=1	1.308	6.958e-05	6100812	7.81785e+06
TGFB1_MOUSE	Transforming growth factor beta-1 OS=Mus musculus GN=Tgfb1 PE=2 SV=1	1.283	5.295e-24	7841468	9914417
GPI8_MOUSE	GPI-anchor transamidase OS=Mus musculus GN=Pigk PE=2 SV=2	1.281	0.0002403	1.52072e+06	2.01416e+06
LRP10_MOUSE	Low-density lipoprotein receptor-related protein 10 OS=Mus musculus GN=Lrp10 PE=2 SV=1	1.277	0.011	1932947	2.46826e+06
AAAT_MOUSE	Neutral amino acid transporter B(0) OS=Mus musculus GN=Slc1a5 PE=2 SV=2	1.277	0.003	2.59891e+06	3.54856e+06
TSN14_MOUSE	Tetraspanin-14 OS=Mus musculus GN=Tspan14 PE=1 SV=1	1.27	0.01	1667760	2.02185e+06
DEK_MOUSE	Protein DEK OS=Mus musculus GN=Dek PE=1 SV=1	1.268	0.01	3.81954e+06	4.88121e+06
XPO4_MOUSE	Exportin-4 OS=Mus musculus GN=Xpo4 PE=1 SV=1	1.247	0.368	2.43471e+06	2.91048e+06
CDS2_MOUSE	Phosphatidate cytidylyltransferase 2 OS=Mus musculus GN=Cds2 PE=1 SV=1	1.246	0.001	3510043	4397118
CTL2_MOUSE	Choline transporter-like protein 2 OS=Mus musculus GN=Slc44a2 PE=1 SV=1	1.245	5.262e-12	3.43883e+06	4297688
PDLI7_MOUSE	PDZ and LIM domain protein 7 OS=Mus musculus GN=Pdlim7 PE=2 SV=1	1.242	0.471	9774266	14104115
LASS6_MOUSE	LAG1 longevity assurance homolog 6 OS=Mus musculus GN=Lass6 PE=1 SV=1	1.234	1.712e-07	12434500	15793087
AT1B3_MOUSE	Sodium/potassium-transporting ATPase subunit beta-3 OS=Mus musculus GN=Atp1b3 PE=1 SV=1	1.229	2.236e-06	4.74132e+06	5916753
CGBP1_MOUSE	CGG triplet repeat-binding protein 1 OS=Mus musculus GN=Cggbp1 PE=2 SV=1	1.223	0.132	3551913	4443092
LASS5_MOUSE	LAG1 longevity assurance homolog 5 OS=Mus musculus GN=Lass5 PE=1 SV=1	1.22	1.227e-23	5.41979e+06	6588429
NTRK3_MOUSE	Isoform L1 of BDNF/NT-3 growth factors receptor OS=Mus musculus GN=Ntrk2	1.219	0.033	14236080	17413912
TAF5_MOUSE	Transcription initiation factor TFIID subunit 5 OS=Mus musculus GN=Taf5 PE=2 SV=1	1.214	0.45	646156	758680
DMAP1_MOUSE	DNA methyltransferase 1-associated protein 1 OS=Mus musculus GN=Dmap1 PE=1 SV=1	1.213	0.331	640729	782684
ASPH_MOUSE	Aspartyl/asparaginyl beta-hydroxylase OS=Mus musculus GN=Asph PE=2 SV=1	1.212	0.391	2864206	3440852
STON2_MOUSE	Stonin-2 OS=Mus musculus GN=Ston2 PE=1 SV=1	1.206	0.018	1.32494e+06	1.59787e+06
TTC28_MOUSE	Tetratricopeptide repeat protein 28 OS=Mus musculus GN=Ttc28 PE=2 SV=2	1.203	4.977e-11	43375960	52173036
WDR3_MOUSE	WD repeat-containing protein 3 OS=Mus musculus GN=Wdr3 PE=2 SV=1	1.202	0.092	4.17908e+06	4.89729e+06
IL3B2_MOUSE	Interleukin-3 receptor class 2 subunit beta OS=Mus musculus GN=Csf2rb2 PE=2 SV=1	1.196	0.097	3.67263e+06	4342391
P4R3A_MOUSE	Serine/threonine-protein phosphatase 4 regulatory subunit 3A OS=Mus musculus GN=Smek1 PE=1 SV=1	1.19	0.0001623	2.1067e+06	2.49611e+06
HYOU1_MOUSE	Hypoxia up-regulated protein 1 OS=Mus musculus GN=Hyou1 PE=1 SV=1	1.187	0.104	493324	649812
ERMP1_MOUSE	Endoplasmic reticulum metallopeptidase 1 OS=Mus musculus GN=Ermp1 PE=1 SV=2	1.186	4.496e-22	8652972	10250509
GAG_MLVHO	Gag polyprotein OS=Hortulanus murine leukemia virus GN=gag PE=3 SV=3	1.183	0.012	7.98123e+06	9932872
GAR1_MOUSE	Isoform 2 of H/ACA ribonucleoprotein complex subunit 1 OS=Mus musculus GN=Gar1	1.179	0.001	4.04338e+06	4501870
PTPRC_MOUSE	Isoform 2 of Receptor-type tyrosine-protein phosphatase C OS=Mus musculus GN=Ptprc	1.17	0.06	1667387	1.95077e+06
GSLG1_MOUSE	Golgi apparatus protein 1 OS=Mus musculus GN=Glg1 PE=1 SV=1	1.169	0.126	2614702	3.07628e+06
ITB1_MOUSE	Integrin beta-1 OS=Mus musculus GN=Itgb1 PE=1 SV=1	1.166	0.001	4.88363e+06	5.76085e+06
RIF1_MOUSE	Isoform 2 of Telomere-associated protein RIF1 OS=Mus musculus GN=Rif1	1.157	0.008	1.57999e+06	1.8312e+06
SUMO1_MOUSE	Small ubiquitin-related modifier 1 OS=Mus musculus GN=Sumo1 PE=1 SV=1	1.153	0.23	4.14207e+06	4844311
HGNAT_MOUSE	Heparan-alpha-glucosaminide N-acetyltransferase OS=Mus musculus GN=Hgsnat PE=1 SV=1	1.149	0.196	2499923	2.86844e+06
NAPSA_MOUSE	Napsin-A OS=Mus musculus GN=Napsa PE=1 SV=1	1.147	0.067	3.12613e+06	3.59538e+06
CDK2_MOUSE	Cyclin-dependent kinase 2 OS=Mus musculus GN=Cdk2 PE=1 SV=2	1.147	0.537	1.07948e+06	1.24508e+06
PICA_MOUSE	Isoform 2 of Phosphatidylinositol-binding clathrin assembly protein OS=Mus musculus GN=Picalm	1.144	0.649	5.51632e+06	5.07878e+06
PIAS2_MOUSE	E3 SUMO-protein ligase PIAS2 OS=Mus musculus GN=Pias2 PE=1 SV=2	1.142	0.436	1.99745e+06	2.38839e+06
CTF8A_MOUSE	Chromosome transmission fidelity protein 8 homolog isoform 2 OS=Mus musculus GN=Chtf8 PE=2 SV=1	1.142	0.244	2.77879e+06	3.18302e+06
UTP18_MOUSE	U3 small nucleolar RNA-associated protein 18 homolog OS=Mus musculus GN=Utp18 PE=1 SV=1	1.133	0.061	2.83051e+06	3105835
SMCA5_MOUSE	SWI/SNF-related matrix-associated actin-dependent regulator of chromatin subfamily A member 5 OS=Mus musculus GN=Smarca5 PE=1 SV=1	1.133	0.08	8551727	9392999
LAP2B_MOUSE	Isoform Epsilon of Lamina-associated polypeptide 2, isoforms beta/delta/epsilon/gamma OS=Mus musculus GN=Tmpo	1.13	0.069	3668666	4.09203e+06
SEC13_MOUSE	Protein SEC13 homolog OS=Mus musculus GN=Sec13 PE=2 SV=3	1.129	0.218	3.32919e+06	3.75653e+06
LUZP1_MOUSE	Leucine zipper protein 1 OS=Mus musculus GN=Luzp1 PE=1 SV=2	1.129	2.653e-05	35598404	40176508
EBP_MOUSE	3-beta-hydroxysteroid-Delta(8),Delta(7)-isomerase OS=Mus musculus GN=Ebp PE=1 SV=3	1.128	0.003	20424294	23059608
EHMT1_MOUSE	Isoform 2 of Histone-lysine N-methyltransferase EHMT1 OS=Mus musculus GN=Ehmt1	1.128	0.493	1.2951e+06	1.46622e+06
TAOK1_MOUSE	Serine/threonine-protein kinase TAO3 OS=Mus musculus GN=Taok3 PE=1 SV=2	1.127	0.211	3086949	3.48067e+06
CNDD3_MOUSE	Condensin-2 complex subunit D3 OS=Mus musculus GN=Ncapd3 PE=1 SV=2	1.126	0.091	2.37818e+06	2.63006e+06
NKRF_MOUSE	NF-kappa-B-repressing factor OS=Mus musculus GN=Nkrf PE=2 SV=2	1.126	0.032	3.06355e+06	3.45023e+06
ADA10_MOUSE	Disintegrin and metalloproteinase domain-containing protein 10 OS=Mus musculus GN=Adam10 PE=1 SV=1	1.125	0.047	10297005	11697421
SMC1A_MOUSE	Structural maintenance of chromosomes protein 1A OS=Mus musculus GN=Smc1a PE=1 SV=3	1.125	0.135	2229119	2505750
NPTN_MOUSE	Isoform 1 of Neuroplastin OS=Mus musculus GN=Nptn	1.124	0.013	4.36325e+06	4903847
INT10_MOUSE	Integrator complex subunit 10 OS=Mus musculus GN=Ints10 PE=1 SV=3	1.122	0.411	2.75742e+06	3.97047e+06
TF2AA_MOUSE	Transcription initiation factor IIA subunit 1 OS=Mus musculus GN=Gtf2a1 PE=2 SV=2	1.122	0.516	957163	1.07826e+06
H4_MOUSE	Histone H4 OS=Mus musculus GN=Hist1h4a PE=1 SV=2	1.121	8.928e-07	105240392	118304584
SMAD4_MOUSE	Mothers against decapentaplegic homolog 4 OS=Mus musculus GN=Smad4 PE=2 SV=1	1.12	0.423	2.87964e+06	3248809
GLCM_MOUSE	Glucosylceramidase OS=Mus musculus GN=Gba PE=1 SV=1	1.118	0.297	3.71275e+06	4211885
SC61B_MOUSE	Protein transport protein Sec61 subunit beta OS=Mus musculus GN=Sec61b PE=1 SV=3	1.114	0.349	6.3464e+06	7.25817e+06
HDAC1_MOUSE	Histone deacetylase 1 OS=Mus musculus GN=Hdac1 PE=1 SV=1	1.114	0.0003652	13017694	14469530
CTBP2_MOUSE	C-terminal-binding protein 2 OS=Mus musculus GN=Ctbp2 PE=1 SV=2	1.11	0.523	3083107	2.66388e+06
DDX52_MOUSE	Probable ATP-dependent RNA helicase DDX52 OS=Mus musculus GN=Ddx52 PE=2 SV=1	1.107	0.033	3.40901e+06	3787417
H2A1F_MOUSE	Histone H2A type 2-C OS=Mus musculus GN=Hist2h2ac PE=1 SV=3	1.107	3.539e-07	82470008	90910672
H2B1P_MOUSE	Histone H2B type 2-B OS=Mus musculus GN=Hist2h2bb PE=1 SV=3	1.105	0.005	95620360	107543440
API5_MOUSE	Apoptosis inhibitor 5 OS=Mus musculus GN=Api5 PE=2 SV=1	1.105	0.303	1.24161e+06	1.36911e+06
EMSY_MOUSE	Isoform 2 of Protein EMSY OS=Mus musculus GN=Emsy	1.104	0.004	6.63156e+06	7190082
PEBB_MOUSE	Isoform 2 of Core-binding factor subunit beta OS=Mus musculus GN=Cbfb	1.104	0.044	3256432	3596901
NPAT_MOUSE	Protein NPAT OS=Mus musculus GN=Npat PE=2 SV=2	1.102	0.182	2.55012e+06	2815801
ZN800_MOUSE	Zinc finger protein 800 OS=Mus musculus GN=Znf800 PE=1 SV=1	1.101	0.195	2.47725e+06	2718946
DCA13_MOUSE	DDB1- and CUL4-associated factor 13 OS=Mus musculus GN=Dcaf13 PE=2 SV=1	1.099	0.185	1.62008e+06	1.73188e+06
TTF2_MOUSE	Transcription termination factor 2 OS=Mus musculus GN=Ttf2 PE=1 SV=2	1.099	0.487	841004	1008323
SMC3_MOUSE	Structural maintenance of chromosomes protein 3 OS=Mus musculus GN=Smc3 PE=1 SV=2	1.096	0.205	3.36726e+06	3.47295e+06
INT3_MOUSE	Integrator complex subunit 3 OS=Mus musculus GN=Ints3 PE=1 SV=2	1.095	0.428	3.48917e+06	4.09497e+06
HKDC1_MOUSE	Putative hexokinase HKDC1 OS=Mus musculus GN=Hkdc1 PE=2 SV=1	1.095	0.042	28617036	31354024
PSL1_MOUSE	Signal peptide peptidase-like 2B OS=Mus musculus GN=Sppl2b PE=2 SV=2	1.094	0.402	1526191	1.67038e+06
NOL10_MOUSE	Nucleolar protein 10 OS=Mus musculus GN=Nol10 PE=2 SV=1	1.093	0.533	2.22691e+06	2.43821e+06
ITPR1_MOUSE	Isoform 2 of Inositol 1,4,5-trisphosphate receptor type 1 OS=Mus musculus GN=Itpr1	1.092	0.572	1.63336e+06	1.78144e+06
ASH2L_MOUSE	Set1/Ash2 histone methyltransferase complex subunit ASH2 OS=Mus musculus GN=Ash2l PE=1 SV=1	1.092	0.358	2.08434e+06	2.0524e+06
LMA1L_MOUSE	Protein ERGIC-53-like OS=Mus musculus GN=Lman1l PE=2 SV=2	1.09	0.105	5357961	5839341
TEX10_MOUSE	Testis-expressed sequence 10 protein OS=Mus musculus GN=Tex10 PE=2 SV=1	1.086	0.159	1.94379e+06	2.11138e+06
LAP2A_MOUSE	Lamina-associated polypeptide 2, isoforms alpha/zeta OS=Mus musculus GN=Tmpo PE=1 SV=3	1.085	0.306	1895504	1.9226e+06
TMM97_MOUSE	Transmembrane protein 97 OS=Mus musculus GN=Tmem97 PE=2 SV=1	1.084	0.06	4460304	4835010
RBBP4_MOUSE	Histone-binding protein RBBP4 OS=Mus musculus GN=Rbbp4 PE=1 SV=4	1.083	0.159	5.32532e+06	5820562
ZEP1_MOUSE	Zinc finger protein 40 OS=Mus musculus GN=Hivep1 PE=1 SV=1	1.083	0.019	2.4034e+06	2.58066e+06
TBL3_MOUSE	Transducin beta-like protein 3 OS=Mus musculus GN=Tbl3 PE=2 SV=1	1.082	0.19	8203409	8795870
SND1_MOUSE	Staphylococcal nuclease domain-containing protein 1 OS=Mus musculus GN=Snd1 PE=1 SV=1	1.082	0.691	3.4825e+06	3781062
PAR1_MOUSE	Proteinase-activated receptor 1 OS=Mus musculus GN=F2r PE=1 SV=2	1.081	0.476	3.44722e+06	3.76718e+06
ESCO2_MOUSE	N-acetyltransferase ESCO2 OS=Mus musculus GN=Esco2 PE=2 SV=3	1.081	0.18	2856919	3159222
DCA15_MOUSE	DDB1- and CUL4-associated factor 15 OS=Mus musculus GN=Dcaf15 PE=2 SV=1	1.081	0.013	36329272	39252400
WAPL_MOUSE	Wings apart-like protein homolog OS=Mus musculus GN=Wapal PE=1 SV=1	1.079	0.317	1.41048e+06	1.52224e+06
UTP15_MOUSE	U3 small nucleolar RNA-associated protein 15 homolog OS=Mus musculus GN=Utp15 PE=2 SV=1	1.078	0.0001418	3.31465e+06	3540477
H2AZ_MOUSE	Histone H2A.V OS=Mus musculus GN=H2afv PE=1 SV=3	1.077	0.004	76588200	83010128
ERGI1_MOUSE	Endoplasmic reticulum-Golgi intermediate compartment protein 1 OS=Mus musculus GN=Ergic1 PE=1 SV=1	1.076	0.359	3.53093e+06	3.80283e+06
MED14_MOUSE	Mediator of RNA polymerase II transcription subunit 14 OS=Mus musculus GN=Med14 PE=1 SV=1	1.075	0.622	4.35089e+06	4.08241e+06
CLP1L_MOUSE	Cleft lip and palate transmembrane protein 1-like protein OS=Mus musculus GN=Clptm1l PE=2 SV=1	1.075	0.074	5268251	5.48819e+06
HA1K_MOUSE	H-2 class I histocompatibility antigen, K-K alpha chain OS=Mus musculus GN=H2-K1 PE=1 SV=1	1.074	0.415	3350584	3.61191e+06
TMED9_MOUSE	Transmembrane emp24 domain-containing protein 9 OS=Mus musculus GN=Tmed9 PE=2 SV=2	1.071	0.253	10288142	11982665
TMX1_MOUSE	Thioredoxin-related transmembrane protein 1 OS=Mus musculus GN=Tmx1 PE=1 SV=1	1.07	0.43	5.21428e+06	5.39147e+06
H33_MOUSE	Histone H3.3 OS=Mus musculus GN=H3f3a PE=1 SV=2	1.07	0.0008986	234667200	257344352
EF1B_MOUSE	Elongation factor 1-beta OS=Mus musculus GN=Eef1b PE=1 SV=5	1.069	0.314	12801697	12771367
MAZ_MOUSE	Myc-associated zinc finger protein OS=Mus musculus GN=Maz PE=1 SV=1	1.069	0.041	21896168	23757110
ERAP1_MOUSE	Endoplasmic reticulum aminopeptidase 1 OS=Mus musculus GN=Erap1 PE=2 SV=1	1.069	0.598	1.16495e+06	1243245
SMHD1_MOUSE	Structural maintenance of chromosomes flexible hinge domain-containing protein 1 OS=Mus musculus GN=Smchd1 PE=2 SV=2	1.067	0.622	4.10318e+06	4443657
RCC1_MOUSE	Regulator of chromosome condensation OS=Mus musculus GN=Rcc1 PE=1 SV=1	1.065	0.055	8688909	9009379
H32_MOUSE	Histone H3.2 OS=Mus musculus GN=Hist1h3b PE=1 SV=2	1.064	0.14	3.65236e+06	3.91651e+06
E2F8_MOUSE	Transcription factor E2F8 OS=Mus musculus GN=E2f8 PE=1 SV=1	1.063	0.57	1.78011e+06	1.83878e+06
CDC27_MOUSE	Isoform 2 of Cell division cycle protein 27 homolog OS=Mus musculus GN=Cdc27	1.063	0.582	3.34288e+06	3.3099e+06
SMCA4_MOUSE	Transcription activator BRG1 OS=Mus musculus GN=Smarca4 PE=1 SV=1	1.062	0.347	5385216	5617402
H13_MOUSE	Histone H1.3 OS=Mus musculus GN=Hist1h1d PE=1 SV=2	1.061	0.408	4984040	5291329
PF21A_MOUSE	Isoform 3 of PHD finger protein 21A OS=Mus musculus GN=Phf21a	1.06	0.151	4362187	4.60878e+06
ZC3HA_MOUSE	Zinc finger CCCH domain-containing protein 10 OS=Mus musculus GN=Zc3h10 PE=2 SV=1	1.059	0.511	6526882	6912505
RP1_MOUSE	Oxygen-regulated protein 1 OS=Mus musculus GN=Rp1 PE=1 SV=2	1.059	0.418	2.80724e+06	2.97125e+06
TSN3_MOUSE	Tetraspanin-3 OS=Mus musculus GN=Tspan3 PE=1 SV=1	1.058	0.049	10373683	11134219
SMRC1_MOUSE	Isoform 2 of SWI/SNF complex subunit SMARCC1 OS=Mus musculus GN=Smarcc1	1.057	0.462	2.3501e+06	2.62003e+06
PO2F1_MOUSE	Isoform 4 of POU domain, class 2, transcription factor 1 OS=Mus musculus GN=Pou2f1	1.055	0.296	9946415	10742231
ALG12_MOUSE	Dolichyl-P-Man:Man(7)GlcNAc(2)-PP-dolichyl-alpha-1,6-mannosyltransferase OS=Mus musculus GN=Alg12 PE=2 SV=1	1.054	0.719	402725	424740
ADNP2_MOUSE	ADNP homeobox protein 2 OS=Mus musculus GN=Adnp2 PE=2 SV=2	1.054	0.324	7.6858e+06	8205412
STAG1_MOUSE	Cohesin subunit SA-1 OS=Mus musculus GN=Stag1 PE=1 SV=2	1.053	0.188	4.60773e+06	4901077
M89BB_MOUSE	Cell cycle regulator Mat89Bb homolog OS=Mus musculus PE=2 SV=1	1.051	0.202	4229234	4.33804e+06
NOP14_MOUSE	Nucleolar protein 14 OS=Mus musculus GN=Nop14 PE=1 SV=1	1.05	0.46	3.05011e+06	3.22551e+06
PRD10_MOUSE	PR domain zinc finger protein 10 OS=Mus musculus GN=Prdm10 PE=1 SV=2	1.05	0.393	5383669	5648226
DNJC9_MOUSE	DnaJ homolog subfamily C member 9 OS=Mus musculus GN=Dnajc9 PE=2 SV=2	1.05	0.251	2.97332e+06	3121148
RBBP7_MOUSE	Histone-binding protein RBBP7 OS=Mus musculus GN=Rbbp7 PE=1 SV=1	1.05	0.26	15024555	15759135
SSXT_MOUSE	Protein SSXT OS=Mus musculus GN=Ss18 PE=2 SV=1	1.049	0.045	39372748	41930312
RFX2_MOUSE	Isoform 2 of DNA-binding protein RFX2 OS=Mus musculus GN=Rfx2	1.048	0.435	5997461	6221379
MINT_MOUSE	Isoform 2 of Msx2-interacting protein OS=Mus musculus GN=Spen	1.048	0.73	4656715	5.00323e+06
MBRL_MOUSE	Membralin OS=Mus musculus GN=ORF61 PE=1 SV=2	1.047	0.53	2.83792e+06	2.96448e+06
ZN512_MOUSE	Zinc finger protein 512 OS=Mus musculus GN=Znf512 PE=2 SV=2	1.045	0.537	4549202	4.54769e+06
TOP2B_MOUSE	DNA topoisomerase 2-beta OS=Mus musculus GN=Top2b PE=1 SV=2	1.043	0.248	8.22735e+06	8516107
NU214_MOUSE	Nuclear pore complex protein Nup214 OS=Mus musculus GN=Nup214 PE=1 SV=2	1.04	0.524	14430639	14829110
ZN687_MOUSE	Isoform 2 of Zinc finger protein 687 OS=Mus musculus GN=Znf687	1.039	0.537	3.06683e+06	3183950
RAE1L_MOUSE	mRNA export factor OS=Mus musculus GN=Rae1 PE=1 SV=1	1.039	0.525	7018710	7.454e+06
MLL1_MOUSE	Histone-lysine N-methyltransferase MLL OS=Mus musculus GN=Mll PE=2 SV=2	1.039	0.412	4.16382e+06	4325332
NEUA_MOUSE	N-acylneuraminate cytidylyltransferase OS=Mus musculus GN=Cmas PE=1 SV=2	1.038	0.314	3.43007e+06	3.62453e+06
ATF1_MOUSE	Cyclic AMP-dependent transcription factor ATF-1 OS=Mus musculus GN=Atf1 PE=2 SV=1	1.038	0.234	54005352	56221428
NOC2L_MOUSE	Nucleolar complex protein 2 homolog OS=Mus musculus GN=Noc2l PE=1 SV=2	1.038	0.495	6797291	7.22079e+06
CBPD_MOUSE	Carboxypeptidase D OS=Mus musculus GN=Cpd PE=1 SV=1	1.038	0.788	1.43156e+06	1.49041e+06
NH2L1_MOUSE	NHP2-like protein 1 OS=Mus musculus GN=Nhp2l1 PE=2 SV=4	1.038	0.322	9949406	10198646
SNAA_MOUSE	Alpha-soluble NSF attachment protein OS=Mus musculus GN=Napa PE=1 SV=1	1.037	0.839	799651	832221
STIM1_MOUSE	Stromal interaction molecule 1 OS=Mus musculus GN=Stim1 PE=1 SV=1	1.037	0.591	3.60201e+06	3.66931e+06
HTF4_MOUSE	Transcription factor 12 OS=Mus musculus GN=Tcf12 PE=1 SV=1	1.035	0.362	3.61977e+06	3662531
M3K5_MOUSE	Mitogen-activated protein kinase kinase kinase 5 OS=Mus musculus GN=Map3k5 PE=1 SV=2	1.034	0.56	6859712	7086766
MTA3_MOUSE	Isoform 2 of Metastasis-associated protein MTA3 OS=Mus musculus GN=Mta3	1.034	0.251	12651646	13010112
NUP85_MOUSE	Nuclear pore complex protein Nup85 OS=Mus musculus GN=Nup85 PE=1 SV=1	1.033	0.599	7.24234e+06	7503590
UTP20_MOUSE	Small subunit processome component 20 homolog OS=Mus musculus GN=Utp20 PE=2 SV=2	1.032	0.667	3303346	3.34479e+06
ZMYM4_MOUSE	Zinc finger MYM-type protein 4 OS=Mus musculus GN=Zmym4 PE=1 SV=1	1.032	0.568	4.29052e+06	4288012
NUP50_MOUSE	Nuclear pore complex protein Nup50 OS=Mus musculus GN=Nup50 PE=1 SV=2	1.032	0.788	2.62389e+06	2551352
NOC4L_MOUSE	Nucleolar complex protein 4 homolog OS=Mus musculus GN=Noc4l PE=2 SV=1	1.031	0.59	5797990	5850294
TACC1_MOUSE	Transforming acidic coiled-coil-containing protein 1 OS=Mus musculus GN=Tacc1 PE=1 SV=1	1.031	0.532	5650569	5829446
KDM2A_MOUSE	Lysine-specific demethylase 2A OS=Mus musculus GN=Kdm2a PE=1 SV=2	1.031	0.432	4198861	4383638
GALT1_MOUSE	Polypeptide N-acetylgalactosaminyltransferase 1 OS=Mus musculus GN=Galnt1 PE=1 SV=1	1.03	0.677	2.40172e+06	2476230
RBM39_MOUSE	Isoform 2 of RNA-binding protein 39 OS=Mus musculus GN=Rbm39	1.03	0.844	1155282	1.19105e+06
IMP4_MOUSE	U3 small nucleolar ribonucleoprotein protein IMP4 OS=Mus musculus GN=Imp4 PE=2 SV=1	1.03	0.792	3.42945e+06	3.37357e+06
MTA1_MOUSE	Metastasis-associated protein MTA1 OS=Mus musculus GN=Mta1 PE=1 SV=1	1.029	0.513	9294919	9517916
SIN3A_MOUSE	Paired amphipathic helix protein Sin3a OS=Mus musculus GN=Sin3a PE=1 SV=3	1.028	0.687	2.70887e+06	2748898
LCAP_MOUSE	Leucyl-cystinyl aminopeptidase OS=Mus musculus GN=Lnpep PE=1 SV=1	1.028	0.881	1.53244e+06	1.61385e+06
PB1_MOUSE	Protein polybromo-1 OS=Mus musculus GN=Pbrm1 PE=1 SV=3	1.027	0.769	2.17629e+06	2.27127e+06
GATA1_MOUSE	Erythroid transcription factor OS=Mus musculus GN=Gata1 PE=1 SV=1	1.027	0.58	13793846	14048158
GDE1_MOUSE	Glycerophosphodiester phosphodiesterase 1 OS=Mus musculus GN=Gde1 PE=2 SV=1	1.026	0.752	2.74779e+06	2.82132e+06
TYY1_MOUSE	Transcriptional repressor protein YY1 OS=Mus musculus GN=Yy1 PE=1 SV=1	1.025	0.659	6441181	6.80001e+06
RBM14_MOUSE	RNA-binding protein 14 OS=Mus musculus GN=Rbm14 PE=1 SV=1	1.025	0.823	11578529	12345658
ICAM2_MOUSE	Intercellular adhesion molecule 2 OS=Mus musculus GN=Icam2 PE=1 SV=1	1.024	0.806	1.50442e+06	1.5376e+06
CNDG2_MOUSE	Condensin-2 complex subunit G2 OS=Mus musculus GN=Ncapg2 PE=2 SV=1	1.023	0.612	2668497	2.64609e+06
ARI1A_MOUSE	Isoform 2 of AT-rich interactive domain-containing protein 1A OS=Mus musculus GN=Arid1a	1.022	0.508	8532146	8592020
FA48A_MOUSE	Isoform 2 of Protein FAM48A OS=Mus musculus GN=Fam48a	1.022	0.759	2179146	2.17263e+06
WDR43_MOUSE	WD repeat-containing protein 43 OS=Mus musculus GN=Wdr43 PE=1 SV=2	1.022	0.783	3469079	3.65969e+06
STAG2_MOUSE	Cohesin subunit SA-2 OS=Mus musculus GN=Stag2 PE=1 SV=2	1.021	0.816	2.30886e+06	2454452
TOP2A_MOUSE	DNA topoisomerase 2-alpha OS=Mus musculus GN=Top2a PE=1 SV=1	1.021	0.707	5.27227e+06	5413366
RRP12_MOUSE	RRP12-like protein OS=Mus musculus GN=Rrp12 PE=1 SV=1	1.019	0.667	5035656	5.21005e+06
SERPH_MOUSE	Serpin H1 OS=Mus musculus GN=Serpinh1 PE=1 SV=2	1.019	0.468	27612542	28147218
SCC4_MOUSE	MAU2 chromatid cohesion factor homolog OS=Mus musculus GN=Mau2 PE=2 SV=3	1.018	0.806	6668726	6.70434e+06
FACE1_MOUSE	CAAX prenyl protease 1 homolog OS=Mus musculus GN=Zmpste24 PE=1 SV=2	1.018	0.901	7657200	7210902
UTP6_MOUSE	U3 small nucleolar RNA-associated protein 6 homolog OS=Mus musculus GN=Utp6 PE=1 SV=1	1.017	0.825	3.76277e+06	3.5615e+06
ALG2_MOUSE	Alpha-1,3-mannosyltransferase ALG2 OS=Mus musculus GN=Alg2 PE=2 SV=2	1.017	0.944	464355	465962
RFC2_MOUSE	Replication factor C subunit 2 OS=Mus musculus GN=Rfc2 PE=2 SV=1	1.017	0.888	6.19971e+06	6633397
INT4_MOUSE	Integrator complex subunit 4 OS=Mus musculus GN=Ints4 PE=2 SV=1	1.017	0.919	583156	578585
LBR_MOUSE	Lamin-B receptor OS=Mus musculus GN=Lbr PE=1 SV=2	1.017	0.585	50328616	51798544
NEP1_MOUSE	Ribosomal RNA small subunit methyltransferase NEP1 OS=Mus musculus GN=Emg1 PE=1 SV=1	1.016	0.768	2.86752e+06	2.82912e+06
SETX_MOUSE	Probable helicase senataxin OS=Mus musculus GN=Setx PE=2 SV=1	1.015	0.862	2.5072e+06	2.55257e+06
CIR1A_MOUSE	Cirhin OS=Mus musculus GN=Cirh1a PE=2 SV=3	1.015	0.775	5.32403e+06	5.21054e+06
PSIP1_MOUSE	PC4 and SFRS1-interacting protein OS=Mus musculus GN=Psip1 PE=1 SV=1	1.014	0.927	1435819	1.54768e+06
NUP37_MOUSE	Nucleoporin Nup37 OS=Mus musculus GN=Nup37 PE=2 SV=1	1.014	0.84	3.25552e+06	3.41516e+06
SURF6_MOUSE	Surfeit locus protein 6 OS=Mus musculus GN=Surf6 PE=2 SV=1	1.013	0.934	827902	838415
INT1_MOUSE	Integrator complex subunit 1 OS=Mus musculus GN=Ints1 PE=1 SV=2	1.013	0.92	1.83902e+06	1.95507e+06
ZN828_MOUSE	Zinc finger protein 828 OS=Mus musculus GN=Znf828 PE=1 SV=1	1.013	0.932	2923084	2971228
NUP43_MOUSE	Nucleoporin Nup43 OS=Mus musculus GN=Nup43 PE=2 SV=1	1.011	0.898	8758483	8804855
CHD4_MOUSE	Chromodomain-helicase-DNA-binding protein 4 OS=Mus musculus GN=Chd4 PE=1 SV=1	1.011	0.822	6.02577e+06	6008447
LAT1_MOUSE	Large neutral amino acids transporter small subunit 1 OS=Mus musculus GN=Slc7a5 PE=1 SV=1	1.01	0.762	8304543	8.32806e+06
HA13_MOUSE	H-2 class I histocompatibility antigen, D-K alpha chain OS=Mus musculus GN=H2-D1 PE=1 SV=1	1.01	0.796	18162608	18258298
RUNX3_MOUSE	Runt-related transcription factor 3 OS=Mus musculus GN=Runx3 PE=2 SV=2	1.01	0.883	4.6634e+06	4712639
FCGR3_MOUSE	Low affinity immunoglobulin gamma Fc region receptor III OS=Mus musculus GN=Fcgr3 PE=1 SV=1	1.009	0.911	4.64984e+06	4655775
BYST_MOUSE	Bystin OS=Mus musculus GN=Bysl PE=1 SV=3	1.009	0.905	1.61459e+06	1.62903e+06
SUV91_MOUSE	Isoform 2 of Histone-lysine N-methyltransferase SUV39H1 OS=Mus musculus GN=Suv39h1	1.009	0.97	3.89711e+06	3127138
Z280C_MOUSE	Zinc finger protein 280C OS=Mus musculus GN=Znf280c PE=2 SV=1	1.009	0.82	6.70449e+06	6822123
ZHX2_MOUSE	Zinc fingers and homeoboxes protein 2 OS=Mus musculus GN=Zhx2 PE=1 SV=1	1.009	0.87	6.28403e+06	6076984
GTF2I_MOUSE	Isoform 2 of General transcription factor II-I OS=Mus musculus GN=Gtf2i	1.008	0.961	1.22608e+06	1.23051e+06
RPA2_MOUSE	DNA-directed RNA polymerase I subunit RPA2 OS=Mus musculus GN=Polr1b PE=2 SV=1	1.007	0.951	2745302	2.75579e+06
ITB3_MOUSE	Integrin beta-3 OS=Mus musculus GN=Itgb3 PE=2 SV=1	1.007	0.942	4539971	4834177
INCE_MOUSE	Inner centromere protein OS=Mus musculus GN=Incenp PE=1 SV=2	1.006	0.973	1.72556e+06	1.75256e+06
RCC2_MOUSE	Protein RCC2 OS=Mus musculus GN=Rcc2 PE=2 SV=1	1.006	0.878	14460584	14392360
H31_MOUSE	Histone H3.1 OS=Mus musculus GN=Hist1h3a PE=1 SV=2	1.006	0.929	1.78943e+06	1.80287e+06
NFIX_MOUSE	Isoform NFIX1 of Nuclear factor 1 X-type OS=Mus musculus GN=Nfix	1.005	0.931	4715325	4015093
MYRIP_MOUSE	Rab effector MyRIP OS=Mus musculus GN=Myrip PE=1 SV=1	1.005	0.897	11650537	11710720
RFX1_MOUSE	MHC class II regulatory factor RFX1 OS=Mus musculus GN=Rfx1 PE=2 SV=1	1.005	0.94	7330273	7455457
PDS5A_MOUSE	Sister chromatid cohesion protein PDS5 homolog A OS=Mus musculus GN=Pds5a PE=2 SV=2	1.004	0.927	7242332	7.31466e+06
MBD3_MOUSE	Methyl-CpG-binding domain protein 3 OS=Mus musculus GN=Mbd3 PE=1 SV=1	1.004	0.946	1.12013e+06	1101853
GLYR1_MOUSE	Putative oxidoreductase GLYR1 OS=Mus musculus GN=Glyr1 PE=2 SV=1	1.003	0.977	2654275	2.47732e+06
RRP44_MOUSE	Exosome complex exonuclease RRP44 OS=Mus musculus GN=Dis3 PE=2 SV=4	1.003	0.99	2373537	2.8098e+06
ELF1_MOUSE	ETS-related transcription factor Elf-1 OS=Mus musculus GN=Elf1 PE=2 SV=1	1.003	0.939	9163831	9341518
RBP2_MOUSE	E3 SUMO-protein ligase RanBP2 OS=Mus musculus GN=Ranbp2 PE=1 SV=1	1.003	0.926	7.50734e+06	7.56251e+06
BAZ1B_MOUSE	Tyrosine-protein kinase BAZ1B OS=Mus musculus GN=Baz1b PE=1 SV=2	1.001	0.986	5.59225e+06	5578550
DNMT1_MOUSE	DNA (cytosine-5)-methyltransferase 1 OS=Mus musculus GN=Dnmt1 PE=1 SV=5	1	0.986	12995957	13066483
PCID2_MOUSE	PCI domain-containing protein 2 OS=Mus musculus GN=Pcid2 PE=2 SV=1	1	1	3.69525e+06	3.93226e+06
MED12_MOUSE	Mediator of RNA polymerase II transcription subunit 12 OS=Mus musculus GN=Med12 PE=2 SV=1	-1	0.998	2562759	2.51155e+06
CKLF7_MOUSE	CKLF-like MARVEL transmembrane domain-containing protein 7 OS=Mus musculus GN=Cmtm7 PE=2 SV=1	-1.001	0.986	4237440	4234627
DNLI3_MOUSE	DNA ligase 3 OS=Mus musculus GN=Lig3 PE=1 SV=1	-1.001	0.99	2.38571e+06	2348870
NU155_MOUSE	Nuclear pore complex protein Nup155 OS=Mus musculus GN=Nup155 PE=1 SV=1	-1.001	0.984	6.26159e+06	6.35382e+06
P66B_MOUSE	Transcriptional repressor p66-beta OS=Mus musculus GN=Gatad2b PE=1 SV=1	-1.001	0.988	21543702	21426444
IL3RB_MOUSE	Cytokine receptor common subunit beta OS=Mus musculus GN=Csf2rb PE=1 SV=1	-1.002	0.991	5709278	6458539
MAFK_MOUSE	Transcription factor MafK OS=Mus musculus GN=Mafk PE=2 SV=1	-1.002	0.971	22888982	23091110
TRRAP_MOUSE	Transformation/transcription domain-associated protein OS=Mus musculus GN=Trrap PE=1 SV=2	-1.002	0.973	3.75587e+06	3714112
CEBPZ_MOUSE	CCAAT/enhancer-binding protein zeta OS=Mus musculus GN=Cebpz PE=2 SV=2	-1.002	0.975	2732699	2.70597e+06
BAZ1A_MOUSE	Bromodomain adjacent to zinc finger domain protein 1A OS=Mus musculus GN=Baz1a PE=1 SV=2	-1.003	0.943	3576419	3.53014e+06
NUP93_MOUSE	Nuclear pore complex protein Nup93 OS=Mus musculus GN=Nup93 PE=2 SV=1	-1.003	0.958	4436141	4.48298e+06
MTA2_MOUSE	Metastasis-associated protein MTA2 OS=Mus musculus GN=Mta2 PE=1 SV=1	-1.003	0.936	8604640	8581405
ARAP3_MOUSE	Arf-GAP with Rho-GAP domain, ANK repeat and PH domain-containing protein 3 OS=Mus musculus GN=Arap3 PE=1 SV=2	-1.003	0.932	14534848	14492234
MEF2D_MOUSE	Myocyte-specific enhancer factor 2D OS=Mus musculus GN=Mef2d PE=1 SV=1	-1.004	0.914	17657796	17670056
VAC14_MOUSE	Protein VAC14 homolog OS=Mus musculus GN=Vac14 PE=1 SV=1	-1.004	0.977	420465	418925
DCA10_MOUSE	Isoform 2 of DDB1- and CUL4-associated factor 10 OS=Mus musculus GN=Dcaf10	-1.004	0.944	6262831	6242698
NU160_MOUSE	Nuclear pore complex protein Nup160 OS=Mus musculus GN=Nup160 PE=1 SV=2	-1.006	0.861	3.83438e+06	3.88598e+06
ATX1_MOUSE	Ataxin-1 OS=Mus musculus GN=Atxn1 PE=1 SV=2	-1.007	0.962	3552354	3.85813e+06
SEPT1_MOUSE	Septin-1 OS=Mus musculus GN=Sept1 PE=2 SV=2	-1.007	0.738	179661504	178434176
PADI4_MOUSE	Protein-arginine deiminase type-4 OS=Mus musculus GN=Padi4 PE=2 SV=2	-1.007	0.863	9401013	9608847
H2AX_MOUSE	Histone H2A.x OS=Mus musculus GN=H2afx PE=1 SV=2	-1.008	0.855	5824643	5779985
NU188_MOUSE	Nucleoporin NUP188 homolog OS=Mus musculus GN=Nup188 PE=1 SV=2	-1.008	0.913	3764772	3.86488e+06
GOLI_MOUSE	E3 ubiquitin-protein ligase RNF130 OS=Mus musculus GN=Rnf130 PE=2 SV=1	-1.008	0.907	4678810	4933886
TAF6_MOUSE	Transcription initiation factor TFIID subunit 6 OS=Mus musculus GN=Taf6 PE=2 SV=1	-1.009	0.856	9752689	9844125
NFAC2_MOUSE	Nuclear factor of activated T-cells, cytoplasmic 2 OS=Mus musculus GN=Nfatc2 PE=1 SV=2	-1.01	0.813	5446646	5502105
SNF5_MOUSE	SWI/SNF-related matrix-associated actin-dependent regulator of chromatin subfamily B member 1 OS=Mus musculus GN=Smarcb1 PE=1 SV=1	-1.01	0.715	4554280	4511195
POGZ_MOUSE	Pogo transposable element with ZNF domain OS=Mus musculus GN=Pogz PE=1 SV=2	-1.01	0.776	11340252	11183487
EED_MOUSE	Isoform 2 of Polycomb protein EED OS=Mus musculus GN=Eed	-1.011	0.842	4.60178e+06	4.59321e+06
CDC16_MOUSE	Cell division cycle protein 16 homolog OS=Mus musculus GN=Cdc16 PE=2 SV=1	-1.011	0.851	4.82584e+06	4693758
NUPL1_MOUSE	Isoform 2 of Nucleoporin p58/p45 OS=Mus musculus GN=Nupl1	-1.012	0.747	20109068	19983372
CDC23_MOUSE	Cell division cycle protein 23 homolog OS=Mus musculus GN=Cdc23 PE=1 SV=2	-1.012	0.777	5.91064e+06	5942396
HCFC1_MOUSE	Host cell factor 1 OS=Mus musculus GN=Hcfc1 PE=1 SV=1	-1.013	0.485	34498548	34158644
SUMO2_MOUSE	Small ubiquitin-related modifier 2 OS=Mus musculus GN=Sumo2 PE=2 SV=1	-1.014	0.817	39117040	39891428
ZN787_MOUSE	Zinc finger protein 787 OS=Mus musculus GN=Znf787 PE=2 SV=2	-1.014	0.876	463653	461773
ELF2_MOUSE	Isoform 2 of ETS-related transcription factor Elf-2 OS=Mus musculus GN=Elf2	-1.015	0.629	10517803	10612381
MYST3_MOUSE	Histone acetyltransferase MYST3 OS=Mus musculus GN=Myst3 PE=1 SV=2	-1.016	0.843	4037711	4153951
ADA17_MOUSE	Disintegrin and metalloproteinase domain-containing protein 17 OS=Mus musculus GN=Adam17 PE=1 SV=2	-1.016	0.893	1.67486e+06	1.60973e+06
EF1G_MOUSE	Elongation factor 1-gamma OS=Mus musculus GN=Eef1g PE=1 SV=3	-1.016	0.433	23347928	23153368
SUZ12_MOUSE	Polycomb protein Suz12 OS=Mus musculus GN=Suz12 PE=1 SV=2	-1.017	0.941	2521608	3230504
TOP1_MOUSE	DNA topoisomerase 1 OS=Mus musculus GN=Top1 PE=1 SV=2	-1.017	0.743	6436017	6.35471e+06
PO121_MOUSE	Nuclear envelope pore membrane protein POM 121 OS=Mus musculus GN=Pom121 PE=1 SV=2	-1.019	0.714	12768248	12949128
NFRKB_MOUSE	Nuclear factor related to kappa-B-binding protein OS=Mus musculus GN=Nfrkb PE=2 SV=1	-1.02	0.645	7414325	7385491
SSBP3_MOUSE	Single-stranded DNA-binding protein 3 OS=Mus musculus GN=Ssbp3 PE=2 SV=2	-1.02	0.579	8662031	8518117
ZMY11_MOUSE	Zinc finger MYND domain-containing protein 11 OS=Mus musculus GN=Zmynd11 PE=2 SV=1	-1.02	0.848	2.55003e+06	2.49696e+06
RCL1_MOUSE	RNA 3'-terminal phosphate cyclase-like protein OS=Mus musculus GN=Rcl1 PE=2 SV=1	-1.021	0.768	3.98833e+06	3.82058e+06
MBB1A_MOUSE	Myb-binding protein 1A OS=Mus musculus GN=Mybbp1a PE=1 SV=2	-1.022	0.58	8829657	8792470
PARP1_MOUSE	Poly [ADP-ribose] polymerase 1 OS=Mus musculus GN=Parp1 PE=1 SV=3	-1.022	0.562	2597820	2.55304e+06
PLOD3_MOUSE	Procollagen-lysine,2-oxoglutarate 5-dioxygenase 3 OS=Mus musculus GN=Plod3 PE=1 SV=1	-1.022	0.685	3378284	3251875
NRF1_MOUSE	Nuclear respiratory factor 1 OS=Mus musculus GN=Nrf1 PE=2 SV=1	-1.023	0.684	7104899	7129808
CBX3_MOUSE	Chromobox protein homolog 3 OS=Mus musculus GN=Cbx3 PE=1 SV=2	-1.023	0.68	4482664	4357322
RRP1B_MOUSE	Ribosomal RNA processing protein 1 homolog B OS=Mus musculus GN=Rrp1b PE=2 SV=2	-1.023	0.784	1.69022e+06	1.65134e+06
KAISO_MOUSE	Transcriptional regulator Kaiso OS=Mus musculus GN=Zbtb33 PE=1 SV=1	-1.024	0.86	1.38207e+06	1.34573e+06
WDR46_MOUSE	WD repeat-containing protein 46 OS=Mus musculus GN=Wdr46 PE=2 SV=1	-1.024	0.812	3.47202e+06	3488853
SP1_MOUSE	Transcription factor Sp1 OS=Mus musculus GN=Sp1 PE=1 SV=2	-1.024	0.696	10104491	9977335
NAT10_MOUSE	N-acetyltransferase 10 OS=Mus musculus GN=Nat10 PE=2 SV=1	-1.024	0.698	3.94953e+06	3.82333e+06
NSMA3_MOUSE	Isoform 2 of Sphingomyelin phosphodiesterase 4 OS=Mus musculus GN=Smpd4	-1.025	0.753	4331105	3937264
HDAC2_MOUSE	Histone deacetylase 2 OS=Mus musculus GN=Hdac2 PE=1 SV=1	-1.025	0.466	9404636	9238251
INT8_MOUSE	Integrator complex subunit 8 OS=Mus musculus GN=Ints8 PE=2 SV=1	-1.026	0.577	4221781	4.13034e+06
NFYA_MOUSE	Nuclear transcription factor Y subunit alpha OS=Mus musculus GN=Nfya PE=1 SV=2	-1.026	0.587	4546587	4273865
CKAP5_MOUSE	Isoform 2 of Cytoskeleton-associated protein 5 OS=Mus musculus GN=Ckap5	-1.028	0.631	5.48196e+06	5238789
NHP2_MOUSE	H/ACA ribonucleoprotein complex subunit 2 OS=Mus musculus GN=Nhp2 PE=2 SV=1	-1.028	0.471	5.09173e+06	5009185
INT5_MOUSE	Integrator complex subunit 5 OS=Mus musculus GN=Ints5 PE=2 SV=1	-1.031	0.615	4.10918e+06	3921372
LMNB1_MOUSE	Lamin-B1 OS=Mus musculus GN=Lmnb1 PE=1 SV=3	-1.032	0.668	4499906	4.43844e+06
VRK1_MOUSE	Isoform 2 of Serine/threonine-protein kinase VRK1 OS=Mus musculus GN=Vrk1	-1.032	0.815	8643626	8481796
DNM3A_MOUSE	DNA (cytosine-5)-methyltransferase 3A OS=Mus musculus GN=Dnmt3a PE=1 SV=2	-1.032	0.598	2.47651e+06	2.38558e+06
SP130_MOUSE	Histone deacetylase complex subunit SAP130 OS=Mus musculus GN=Sap130 PE=1 SV=2	-1.032	0.566	15480415	15228104
YETS2_MOUSE	Isoform 3 of YEATS domain-containing protein 2 OS=Mus musculus GN=Yeats2	-1.032	0.503	5.66062e+06	5.55459e+06
ELYS_MOUSE	Protein ELYS OS=Mus musculus GN=Ahctf1 PE=1 SV=1	-1.032	0.57	3.00972e+06	3003162
FBRL_MOUSE	rRNA 2'-O-methyltransferase fibrillarin OS=Mus musculus GN=Fbl PE=1 SV=2	-1.033	0.592	10667059	10501389
CAF1B_MOUSE	Chromatin assembly factor 1 subunit B OS=Mus musculus GN=Chaf1b PE=2 SV=1	-1.033	0.85	1.74962e+06	1.69085e+06
INT11_MOUSE	Integrator complex subunit 11 OS=Mus musculus GN=Cpsf3l PE=2 SV=1	-1.033	0.386	3.39855e+06	3.3318e+06
REQU_MOUSE	Zinc finger protein ubi-d4 OS=Mus musculus GN=Dpf2 PE=1 SV=1	-1.034	0.328	4811641	4660219
CSTF1_MOUSE	Cleavage stimulation factor subunit 1 OS=Mus musculus GN=Cstf1 PE=2 SV=1	-1.034	0.529	3.67051e+06	3.64863e+06
INT9_MOUSE	Integrator complex subunit 9 OS=Mus musculus GN=Ints9 PE=2 SV=1	-1.034	0.571	3.76559e+06	3.64388e+06
ZFX_MOUSE	Zinc finger autosomal protein OS=Mus musculus GN=Zfa PE=2 SV=1	-1.034	0.74	4.22157e+06	4084598
ZN865_MOUSE	Zinc finger protein 865 OS=Mus musculus GN=Znf865 PE=2 SV=1	-1.035	0.721	1.72076e+06	1663407
UBN2_MOUSE	Isoform 2 of Ubinuclein-2 OS=Mus musculus GN=Ubn2	-1.035	0.403	7.24244e+06	6.83094e+06
CBX5_MOUSE	Chromobox protein homolog 5 OS=Mus musculus GN=Cbx5 PE=1 SV=1	-1.038	0.612	6071359	5.86374e+06
TM87A_MOUSE	Isoform 2 of Transmembrane protein 87A OS=Mus musculus GN=Tmem87a	-1.038	0.784	4533365	4397631
NOL11_MOUSE	Nucleolar protein 11 OS=Mus musculus GN=Nol11 PE=2 SV=1	-1.039	0.506	4840965	4700009
RUNX1_MOUSE	Isoform 4 of Runt-related transcription factor 1 OS=Mus musculus GN=Runx1	-1.039	0.347	23359262	23028084
DDX56_MOUSE	Probable ATP-dependent RNA helicase DDX56 OS=Mus musculus GN=Ddx56 PE=2 SV=1	-1.04	0.514	4.85213e+06	4.78073e+06
SSF1_MOUSE	Suppressor of SWI4 1 homolog OS=Mus musculus GN=Ppan PE=2 SV=1	-1.04	0.434	8577454	8247712
MNT_MOUSE	Max-binding protein MNT OS=Mus musculus GN=Mnt PE=2 SV=1	-1.041	0.478	5676997	5.13212e+06
JHD2C_MOUSE	Probable JmjC domain-containing histone demethylation protein 2C OS=Mus musculus GN=Jmjd1c PE=1 SV=2	-1.041	0.605	6349182	5.92573e+06
EP400_MOUSE	Isoform 3 of E1A-binding protein p400 OS=Mus musculus GN=Ep400	-1.042	0.158	6264063	6017846
P3C2G_MOUSE	Phosphatidylinositol-4-phosphate 3-kinase C2 domain-containing subunit gamma OS=Mus musculus GN=Pik3c2g PE=2 SV=1	-1.042	0.567	3.38528e+06	3249311
ADPGK_MOUSE	ADP-dependent glucokinase OS=Mus musculus GN=Adpgk PE=1 SV=2	-1.042	0.72	4.48468e+06	3904231
NCOA6_MOUSE	Nuclear receptor coactivator 6 OS=Mus musculus GN=Ncoa6 PE=1 SV=1	-1.042	0.248	4434605	4340959
DDX18_MOUSE	ATP-dependent RNA helicase DDX18 OS=Mus musculus GN=Ddx18 PE=2 SV=1	-1.043	0.55	4.23829e+06	4147003
TTYH3_MOUSE	Protein tweety homolog 3 OS=Mus musculus GN=Ttyh3 PE=1 SV=1	-1.043	0.894	57140.9	54800.4
WDR5_MOUSE	WD repeat-containing protein 5 OS=Mus musculus GN=Wdr5 PE=1 SV=1	-1.043	0.49	4.01139e+06	3.74677e+06
ELAV1_MOUSE	ELAV-like protein 1 OS=Mus musculus GN=Elavl1 PE=1 SV=1	-1.043	0.512	7112499	6.61611e+06
H2AY_MOUSE	Core histone macro-H2A.1 OS=Mus musculus GN=H2afy PE=1 SV=3	-1.043	0.476	12213493	11588383
UBN1_MOUSE	Isoform 2 of Ubinuclein-1 OS=Mus musculus GN=Ubn1	-1.044	0.386	3941109	3680268
MTG16_MOUSE	Isoform 2 of Protein CBFA2T3 OS=Mus musculus GN=Cbfa2t3	-1.044	0.635	4961531	4640049
NOM1_MOUSE	Nucleolar MIF4G domain-containing protein 1 OS=Mus musculus GN=Nom1 PE=2 SV=1	-1.045	0.629	2.05773e+06	1.97229e+06
SUH_MOUSE	Recombining binding protein suppressor of hairless OS=Mus musculus GN=Rbpj PE=1 SV=1	-1.046	0.421	12847492	12475676
FOSL2_MOUSE	Fos-related antigen 2 OS=Mus musculus GN=Fosl2 PE=2 SV=1	-1.046	0.583	6.4051e+06	6.07203e+06
CIC_MOUSE	Protein capicua homolog OS=Mus musculus GN=Cic PE=1 SV=2	-1.046	0.66	4125264	4340331
BI1_MOUSE	Bax inhibitor 1 OS=Mus musculus GN=Tmbim6 PE=2 SV=1	-1.047	0.402	2818614	2.69233e+06
ASXL2_MOUSE	Putative Polycomb group protein ASXL2 OS=Mus musculus GN=Asxl2 PE=2 SV=1	-1.048	0.661	1.24027e+06	1.18326e+06
DDX21_MOUSE	Nucleolar RNA helicase 2 OS=Mus musculus GN=Ddx21 PE=1 SV=2	-1.05	0.162	10482410	10114722
CYTC_MOUSE	Cystatin-C OS=Mus musculus GN=Cst3 PE=2 SV=2	-1.05	0.643	2367764	2.25905e+06
SMRC2_MOUSE	SWI/SNF complex subunit SMARCC2 OS=Mus musculus GN=Smarcc2 PE=1 SV=2	-1.05	0.649	8550810	8.17976e+06
REPI1_MOUSE	Replication initiator 1 OS=Mus musculus GN=Repin1 PE=2 SV=1	-1.051	0.64	672117	639413
NOP56_MOUSE	Nucleolar protein 56 OS=Mus musculus GN=Nop56 PE=1 SV=2	-1.052	0.178	10244212	9931303
EVI1_MOUSE	MDS1 and EVI1 complex locus protein EVI1 OS=Mus musculus GN=Mecom PE=1 SV=1	-1.052	0.506	2338343	2369628
LIN54_MOUSE	Protein lin-54 homolog OS=Mus musculus GN=Lin54 PE=2 SV=2	-1.052	0.188	7854336	7.58303e+06
CREB1_MOUSE	Cyclic AMP-responsive element-binding protein 1 OS=Mus musculus GN=Creb1 PE=1 SV=1	-1.052	0.014	16004794	15173132
NUP62_MOUSE	Nuclear pore glycoprotein p62 OS=Mus musculus GN=Nup62 PE=1 SV=2	-1.053	0.123	23141628	22497796
UBP36_MOUSE	Ubiquitin carboxyl-terminal hydrolase 36 OS=Mus musculus GN=Usp36 PE=2 SV=1	-1.053	0.648	1.83377e+06	1.73964e+06
K0020_MOUSE	Pumilio domain-containing protein KIAA0020 OS=Mus musculus GN=Kiaa0020 PE=2 SV=2	-1.055	0.472	2.51566e+06	2.40148e+06
ANR32_MOUSE	Ankyrin repeat domain-containing protein 32 OS=Mus musculus GN=Ankrd32 PE=2 SV=3	-1.055	0.824	180881	171452
NFYB_MOUSE	Nuclear transcription factor Y subunit beta OS=Mus musculus GN=Nfyb PE=1 SV=1	-1.055	0.532	1.30465e+06	1.53416e+06
IKZF2_MOUSE	Zinc finger protein Helios OS=Mus musculus GN=Ikzf2 PE=1 SV=1	-1.056	0.182	7205437	6919809
DOCK2_MOUSE	Dedicator of cytokinesis protein 2 OS=Mus musculus GN=Dock2 PE=1 SV=2	-1.056	0.579	3.05128e+06	2.79335e+06
PHC1_MOUSE	Isoform 3 of Polyhomeotic-like protein 1 OS=Mus musculus GN=Phc1	-1.056	0.098	5371889	5147264
ARI1A_MOUSE	AT-rich interactive domain-containing protein 1A OS=Mus musculus GN=Arid1a PE=1 SV=1	-1.056	0.139	14390749	13819476
MED25_MOUSE	Isoform 2 of Mediator of RNA polymerase II transcription subunit 25 OS=Mus musculus GN=Med25	-1.057	0.036	4.27346e+06	4.05162e+06
MCTS1_MOUSE	Malignant T cell-amplified sequence 1 OS=Mus musculus GN=Mcts1 PE=2 SV=1	-1.057	0.135	5300998	5017672
NOXIN_MOUSE	Nitric oxide-inducible gene protein OS=Mus musculus GN=Noxin PE=2 SV=1	-1.059	0.262	10866626	10273860
GATA2_MOUSE	Endothelial transcription factor GATA-2 OS=Mus musculus GN=Gata2 PE=2 SV=2	-1.059	0.292	6104042	5.79412e+06
H14_MOUSE	Histone H1.4 OS=Mus musculus GN=Hist1h1e PE=1 SV=2	-1.06	0.612	10254598	10066306
FOXP1_MOUSE	Isoform 3 of Forkhead box protein P1 OS=Mus musculus GN=Foxp1	-1.06	0.088	9199215	8693378
NU107_MOUSE	Nuclear pore complex protein Nup107 OS=Mus musculus GN=Nup107 PE=2 SV=1	-1.06	0.602	2.70561e+06	2359325
PESC_MOUSE	Pescadillo homolog OS=Mus musculus GN=Pes1 PE=1 SV=1	-1.061	0.236	9970493	9106382
SRBD1_MOUSE	S1 RNA-binding domain-containing protein 1 OS=Mus musculus GN=Srbd1 PE=1 SV=2	-1.061	0.448	1.93945e+06	1.86157e+06
CM027_MOUSE	Uncharacterized protein C13orf27 homolog OS=Mus musculus PE=2 SV=1	-1.064	0.207	2.811e+06	2.64205e+06
TIF1B_MOUSE	Transcription intermediary factor 1-beta OS=Mus musculus GN=Trim28 PE=1 SV=3	-1.065	0.238	5.76333e+06	5498832
OGT1_MOUSE	UDP-N-acetylglucosamine--peptide N-acetylglucosaminyltransferase 110 kDa subunit OS=Mus musculus GN=Ogt PE=1 SV=2	-1.065	0.168	2.26708e+06	2.15974e+06
MCM7_MOUSE	DNA replication licensing factor MCM7 OS=Mus musculus GN=Mcm7 PE=2 SV=1	-1.065	0.479	4.26312e+06	4.04396e+06
RRMJ3_MOUSE	Putative rRNA methyltransferase 3 OS=Mus musculus GN=Ftsj3 PE=1 SV=1	-1.066	0.636	4.87328e+06	4755084
CN021_MOUSE	Pumilio domain-containing protein C14orf21 homolog OS=Mus musculus PE=2 SV=1	-1.066	0.307	3.34936e+06	2.9037e+06
ZN609_MOUSE	Zinc finger protein 609 OS=Mus musculus GN=Znf609 PE=1 SV=2	-1.066	0.197	5577602	5408637
NOL6_MOUSE	Nucleolar protein 6 OS=Mus musculus GN=Nol6 PE=2 SV=2	-1.067	0.298	4.93826e+06	4.89216e+06
RALY_MOUSE	RNA-binding protein Raly OS=Mus musculus GN=Raly PE=1 SV=2	-1.068	0.372	2.22839e+06	1.99729e+06
THOC2_MOUSE	THO complex subunit 2 OS=Mus musculus GN=Thoc2 PE=3 SV=1	-1.068	0.583	3596467	3.46106e+06
DPOE1_MOUSE	DNA polymerase epsilon catalytic subunit A OS=Mus musculus GN=Pole PE=2 SV=2	-1.068	0.584	603474	564745
RBM25_MOUSE	RNA-binding protein 25 OS=Mus musculus GN=Rbm25 PE=1 SV=1	-1.069	0.547	4551537	3882536
TOX4_MOUSE	TOX high mobility group box family member 4 OS=Mus musculus GN=Tox4 PE=1 SV=2	-1.07	0.02	18147916	17118760
RDHE2_MOUSE	Epidermal retinol dehydrogenase 2 OS=Mus musculus GN=Sdr16c5 PE=2 SV=1	-1.071	0.276	2235505	2.08737e+06
NOP58_MOUSE	Nucleolar protein 58 OS=Mus musculus GN=Nop58 PE=1 SV=1	-1.072	0.163	7483710	7.00999e+06
TF3C4_MOUSE	General transcription factor 3C polypeptide 4 OS=Mus musculus GN=Gtf3c4 PE=1 SV=1	-1.072	0.218	1.80227e+06	1.75602e+06
KCNQ1_MOUSE	Potassium voltage-gated channel subfamily KQT member 1 OS=Mus musculus GN=Kcnq1 PE=2 SV=2	-1.072	0.244	4109183	3830369
RL26_MOUSE	60S ribosomal protein L26 OS=Mus musculus GN=Rpl26 PE=2 SV=1	-1.073	0.729	5.3998e+06	4.909e+06
PDS5B_MOUSE	Sister chromatid cohesion protein PDS5 homolog B OS=Mus musculus GN=Pds5b PE=1 SV=1	-1.073	0.233	6.90476e+06	6341495
TM209_MOUSE	Isoform 2 of Transmembrane protein 209 OS=Mus musculus GN=Tmem209	-1.073	0.54	2.8018e+06	2.61279e+06
NOP2_MOUSE	Putative ribosomal RNA methyltransferase NOP2 OS=Mus musculus GN=Nop2 PE=2 SV=1	-1.073	0.38	4.14845e+06	4.0597e+06
WDR82_MOUSE	WD repeat-containing protein 82 OS=Mus musculus GN=Wdr82 PE=1 SV=1	-1.075	0.446	3070196	2.86246e+06
PLRG1_MOUSE	Pleiotropic regulator 1 OS=Mus musculus GN=Plrg1 PE=2 SV=1	-1.075	0.609	5.87566e+06	5.88332e+06
ORC3_MOUSE	Origin recognition complex subunit 3 OS=Mus musculus GN=Orc3 PE=1 SV=1	-1.076	0.352	3.87422e+06	3635756
SUMO3_MOUSE	Small ubiquitin-related modifier 3 OS=Mus musculus GN=Sumo3 PE=2 SV=1	-1.077	0.656	4635288	4.31233e+06
NU133_MOUSE	Nuclear pore complex protein Nup133 OS=Mus musculus GN=Nup133 PE=1 SV=1	-1.077	0.115	2.79679e+06	2.62327e+06
DKC1_MOUSE	H/ACA ribonucleoprotein complex subunit 4 OS=Mus musculus GN=Dkc1 PE=1 SV=3	-1.078	0.144	4724408	4496535
SP16H_MOUSE	FACT complex subunit SPT16 OS=Mus musculus GN=Supt16h PE=1 SV=2	-1.079	0.151	6.17733e+06	5432944
TM9S4_MOUSE	Transmembrane 9 superfamily member 4 OS=Mus musculus GN=Tm9sf4 PE=2 SV=1	-1.08	0.443	1.71959e+06	1.59553e+06
PWP2_MOUSE	Periodic tryptophan protein 2 homolog OS=Mus musculus GN=Pwp2 PE=1 SV=1	-1.08	0.4	5018361	4484000
HMGB2_MOUSE	High mobility group protein B2 OS=Mus musculus GN=Hmgb2 PE=1 SV=3	-1.081	0.028	8667228	8229644
MD1L1_MOUSE	Mitotic spindle assembly checkpoint protein MAD1 OS=Mus musculus GN=Mad1l1 PE=2 SV=1	-1.082	0.253	8595804	7.94704e+06
RPF1_MOUSE	Ribosome production factor 1 OS=Mus musculus GN=Rpf1 PE=2 SV=2	-1.083	0.133	3.11103e+06	2872045
DOC11_MOUSE	Dedicator of cytokinesis protein 11 OS=Mus musculus GN=Dock11 PE=1 SV=1	-1.084	0.295	1.55081e+06	1.43126e+06
ORC4_MOUSE	Origin recognition complex subunit 4 OS=Mus musculus GN=Orc4 PE=1 SV=1	-1.084	0.084	1.63575e+06	1.51083e+06
RPRD2_MOUSE	Regulation of nuclear pre-mRNA domain-containing protein 2 OS=Mus musculus GN=Rprd2 PE=1 SV=1	-1.085	0.068	5.16602e+06	4685334
PPBT_MOUSE	Alkaline phosphatase, tissue-nonspecific isozyme OS=Mus musculus GN=Alpl PE=1 SV=1	-1.085	0.237	6687977	6166849
TAF9_MOUSE	Transcription initiation factor TFIID subunit 9 OS=Mus musculus GN=Taf9 PE=2 SV=1	-1.086	0.121	4217472	3.90463e+06
AAAS_MOUSE	Aladin OS=Mus musculus GN=Aaas PE=1 SV=1	-1.087	0.03	9712759	8899245
PGLT1_MOUSE	Protein O-glucosyltransferase 1 OS=Mus musculus GN=Poglut1 PE=2 SV=2	-1.087	0.706	581740	535345
ALG3_MOUSE	Dolichyl-P-Man:Man(5)GlcNAc(2)-PP-dolichyl mannosyltransferase OS=Mus musculus GN=Alg3 PE=2 SV=1	-1.087	0.728	6390064	7538588
SFRP1_MOUSE	Secreted frizzled-related protein 1 OS=Mus musculus GN=Sfrp1 PE=1 SV=2	-1.087	0.449	2.11561e+06	1.94293e+06
WDR12_MOUSE	Ribosome biogenesis protein WDR12 OS=Mus musculus GN=Wdr12 PE=2 SV=1	-1.088	0.291	7507658	7119379
MED23_MOUSE	Isoform 2 of Mediator of RNA polymerase II transcription subunit 23 OS=Mus musculus GN=Med23	-1.088	0.386	3.07392e+06	2844726
RB_MOUSE	Retinoblastoma-associated protein OS=Mus musculus GN=Rb1 PE=1 SV=1	-1.088	0.519	1650808	1.52149e+06
SEH1_MOUSE	Nucleoporin SEH1 OS=Mus musculus GN=Seh1l PE=2 SV=1	-1.089	0.421	3.59112e+06	3.05867e+06
RUNX2_MOUSE	Isoform 2 of Runt-related transcription factor 2 OS=Mus musculus GN=Runx2	-1.089	0.371	7826232	7378722
BRX1_MOUSE	Ribosome biogenesis protein BRX1 homolog OS=Mus musculus GN=Brix1 PE=2 SV=3	-1.089	0.174	4970228	4998573
PCNA_MOUSE	Proliferating cell nuclear antigen OS=Mus musculus GN=Pcna PE=1 SV=2	-1.09	0.52	6.9579e+06	7.18899e+06
IKZF1_MOUSE	DNA-binding protein Ikaros OS=Mus musculus GN=Ikzf1 PE=1 SV=2	-1.091	0.157	5.94102e+06	5.51576e+06
SC6A6_MOUSE	Sodium- and chloride-dependent taurine transporter OS=Mus musculus GN=Slc6a6 PE=1 SV=2	-1.091	0.05	5.67576e+06	5202305
ENPP4_MOUSE	Ectonucleotide pyrophosphatase/phosphodiesterase family member 4 OS=Mus musculus GN=Enpp4 PE=1 SV=1	-1.091	0.137	1.2075e+06	1.14148e+06
PHIP_MOUSE	PH-interacting protein OS=Mus musculus GN=Phip PE=1 SV=2	-1.092	0.112	1.10735e+06	1.01193e+06
CDKA1_MOUSE	Cyclin-dependent kinase 2-associated protein 1 OS=Mus musculus GN=Cdk2ap1 PE=3 SV=2	-1.093	0.167	4.77012e+06	4488482
SCAF8_MOUSE	Protein SCAF8 OS=Mus musculus GN=Scaf8 PE=1 SV=1	-1.093	0.019	6.18294e+06	5439651
P66A_MOUSE	Transcriptional repressor p66 alpha OS=Mus musculus GN=Gatad2a PE=1 SV=2	-1.093	0.015	10403196	9524303
ROD1_MOUSE	Regulator of differentiation 1 OS=Mus musculus GN=Rod1 PE=2 SV=1	-1.093	0.25	3.00216e+06	3.04302e+06
NIP7_MOUSE	60S ribosome subunit biogenesis protein NIP7 homolog OS=Mus musculus GN=Nip7 PE=2 SV=1	-1.094	0.222	4.28814e+06	4330514
HP1B3_MOUSE	Isoform 2 of Heterochromatin protein 1-binding protein 3 OS=Mus musculus GN=Hp1bp3	-1.094	0.649	1.41976e+06	1.57793e+06
MED15_MOUSE	Mediator of RNA polymerase II transcription subunit 15 OS=Mus musculus GN=Med15 PE=2 SV=2	-1.095	0.0001385	6.89002e+06	6.32251e+06
PRD16_MOUSE	Isoform 2 of PR domain zinc finger protein 16 OS=Mus musculus GN=Prdm16	-1.096	0.003	40395220	36866976
HNRPM_MOUSE	Heterogeneous nuclear ribonucleoprotein M OS=Mus musculus GN=Hnrnpm PE=1 SV=3	-1.096	0.004	6100920	5724215
RAGP1_MOUSE	Ran GTPase-activating protein 1 OS=Mus musculus GN=Rangap1 PE=1 SV=1	-1.097	0.346	2.63129e+06	2528951
TFE2_MOUSE	Transcription factor E2-alpha OS=Mus musculus GN=Tcf3 PE=1 SV=2	-1.097	0.157	4.586e+06	4165790
SYVC_MOUSE	Valyl-tRNA synthetase OS=Mus musculus GN=Vars PE=2 SV=1	-1.098	0.054	9596772	8874554
MCM2_MOUSE	DNA replication licensing factor MCM2 OS=Mus musculus GN=Mcm2 PE=1 SV=3	-1.099	0.109	5.40713e+06	4.97158e+06
KLF16_MOUSE	Krueppel-like factor 16 OS=Mus musculus GN=Klf16 PE=2 SV=2	-1.099	0.388	4.04277e+06	3.67628e+06
KHDR1_MOUSE	KH domain-containing, RNA-binding, signal transduction-associated protein 1 OS=Mus musculus GN=Khdrbs1 PE=1 SV=2	-1.1	0.11	9952337	9308373
SF3B1_MOUSE	Splicing factor 3B subunit 1 OS=Mus musculus GN=Sf3b1 PE=1 SV=1	-1.101	0.135	6.39701e+06	5723130
E2F2_MOUSE	Transcription factor E2F2 OS=Mus musculus GN=E2f2 PE=1 SV=2	-1.102	0.399	437081	396782
BRE_MOUSE	Isoform 1 of BRCA1-A complex subunit BRE OS=Mus musculus GN=Bre	-1.102	0.645	697504	638119
CC021_MOUSE	Uncharacterized protein C3orf21 homolog OS=Mus musculus PE=2 SV=1	-1.103	0.354	3818806	3461104
GABPA_MOUSE	GA-binding protein alpha chain OS=Mus musculus GN=Gabpa PE=1 SV=1	-1.104	0.227	7767957	6.81703e+06
FOXK2_MOUSE	Forkhead box protein K2 OS=Mus musculus GN=Foxk2 PE=2 SV=2	-1.104	0.003	15487375	13855656
CPXM1_MOUSE	Probable carboxypeptidase X1 OS=Mus musculus GN=Cpxm1 PE=2 SV=1	-1.105	0.355	8.21918e+06	7.4437e+06
SIX4_MOUSE	Isoform 2 of Homeobox protein SIX4 OS=Mus musculus GN=Six4	-1.105	0.002	4997430	4546665
MED16_MOUSE	Mediator of RNA polymerase II transcription subunit 16 OS=Mus musculus GN=Med16 PE=2 SV=1	-1.106	0.082	2.93223e+06	2.50955e+06
TRA2B_MOUSE	Transformer-2 protein homolog beta OS=Mus musculus GN=Tra2b PE=1 SV=1	-1.106	0.506	2422104	2202375
B4GT1_MOUSE	Beta-1,4-galactosyltransferase 1 OS=Mus musculus GN=B4galt1 PE=1 SV=1	-1.107	0.041	5491883	4925347
SFPQ_MOUSE	Splicing factor, proline- and glutamine-rich OS=Mus musculus GN=Sfpq PE=1 SV=1	-1.108	0.002	14604159	13461320
ERGI2_MOUSE	Endoplasmic reticulum-Golgi intermediate compartment protein 2 OS=Mus musculus GN=Ergic2 PE=2 SV=1	-1.109	0.536	925917	836661
NCOR2_MOUSE	Nuclear receptor corepressor 2 OS=Mus musculus GN=Ncor2 PE=1 SV=2	-1.111	0.09	3184022	2.86656e+06
HIRA_MOUSE	Protein HIRA OS=Mus musculus GN=Hira PE=1 SV=3	-1.111	0.565	2.0022e+06	1.80019e+06
HNRPL_MOUSE	Heterogeneous nuclear ribonucleoprotein L OS=Mus musculus GN=Hnrnpl PE=1 SV=2	-1.112	0.002	25363032	22604538
KDM5B_MOUSE	Lysine-specific demethylase 5B OS=Mus musculus GN=Kdm5b PE=1 SV=1	-1.113	0.759	85137.2	78451.9
HELLS_MOUSE	Lymphocyte-specific helicase OS=Mus musculus GN=Hells PE=1 SV=2	-1.114	0.302	1.44419e+06	1.53086e+06
ACL6A_MOUSE	Actin-like protein 6A OS=Mus musculus GN=Actl6a PE=1 SV=2	-1.114	0.099	4.96127e+06	4352823
MDC1_MOUSE	Mediator of DNA damage checkpoint protein 1 OS=Mus musculus GN=Mdc1 PE=1 SV=1	-1.115	0.463	269470	241583
PK1IP_MOUSE	p21-activated protein kinase-interacting protein 1 OS=Mus musculus GN=Pak1ip1 PE=2 SV=2	-1.116	0.0004964	4.87236e+06	4388058
NUP54_MOUSE	Nuclear pore complex protein Nup54 OS=Mus musculus GN=Nup54 PE=1 SV=1	-1.116	0.038	8.34961e+06	7.55001e+06
PIAS3_MOUSE	E3 SUMO-protein ligase PIAS3 OS=Mus musculus GN=Pias3 PE=1 SV=3	-1.116	0.0007243	20012464	17932160
CEPT1_MOUSE	Choline/ethanolaminephosphotransferase 1 OS=Mus musculus GN=Cept1 PE=2 SV=1	-1.116	0.108	13664206	12237191
NIPBL_MOUSE	Nipped-B-like protein OS=Mus musculus GN=Nipbl PE=1 SV=1	-1.116	0.336	1.43419e+06	1378470
JUNB_MOUSE	Transcription factor jun-B OS=Mus musculus GN=Junb PE=1 SV=1	-1.117	0.18	2274945	2.02919e+06
SP3_MOUSE	Isoform 2 of Transcription factor Sp3 OS=Mus musculus GN=Sp3	-1.117	0.567	4.1004e+06	3.87565e+06
MCM6_MOUSE	DNA replication licensing factor MCM6 OS=Mus musculus GN=Mcm6 PE=1 SV=1	-1.118	0.013	4.44729e+06	3.99774e+06
PP1B_MOUSE	Serine/threonine-protein phosphatase PP1-beta catalytic subunit OS=Mus musculus GN=Ppp1cb PE=1 SV=3	-1.119	0.006	9837484	8637815
RRP5_MOUSE	Protein RRP5 homolog OS=Mus musculus GN=Pdcd11 PE=2 SV=2	-1.12	0.074	4.83901e+06	4.37971e+06
FEN1_MOUSE	Flap endonuclease 1 OS=Mus musculus GN=Fen1 PE=1 SV=1	-1.121	0.072	6700793	5.94024e+06
PTSS2_MOUSE	Phosphatidylserine synthase 2 OS=Mus musculus GN=Ptdss2 PE=2 SV=2	-1.121	0.099	4.67305e+06	4.16899e+06
BUB3_MOUSE	Mitotic checkpoint protein BUB3 OS=Mus musculus GN=Bub3 PE=2 SV=1	-1.122	5.329e-08	10046801	8965987
RINT1_MOUSE	RAD50-interacting protein 1 OS=Mus musculus GN=Rint1 PE=2 SV=2	-1.123	0.015	17470910	15539162
RREB1_MOUSE	Isoform 2 of Ras-responsive element-binding protein 1 OS=Mus musculus GN=Rreb1	-1.124	0.2	2.45563e+06	2190985
SYMPK_MOUSE	Symplekin OS=Mus musculus GN=Sympk PE=1 SV=1	-1.124	0.000214	1.93963e+06	1.72611e+06
GFI1B_MOUSE	Zinc finger protein Gfi-1b OS=Mus musculus GN=Gfi1b PE=1 SV=1	-1.124	0.091	6.65686e+06	5583116
CTCF_MOUSE	Transcriptional repressor CTCF OS=Mus musculus GN=Ctcf PE=1 SV=2	-1.125	0.054	6.31698e+06	5725629
VA0D1_MOUSE	V-type proton ATPase subunit d 1 OS=Mus musculus GN=Atp6v0d1 PE=1 SV=2	-1.125	0.034	2358699	2.09728e+06
NONO_MOUSE	Non-POU domain-containing octamer-binding protein OS=Mus musculus GN=Nono PE=1 SV=3	-1.126	0.02	4959926	4.55137e+06
TF3C1_MOUSE	General transcription factor 3C polypeptide 1 OS=Mus musculus GN=Gtf3c1 PE=2 SV=2	-1.126	0.265	591011	520087
THS7A_MOUSE	Thrombospondin type-1 domain-containing protein 7A OS=Mus musculus GN=Thsd7a PE=2 SV=2	-1.126	0.111	8177290	7267407
ETV6_MOUSE	Transcription factor ETV6 OS=Mus musculus GN=Etv6 PE=1 SV=1	-1.126	0.122	2.37981e+06	2.11987e+06
PRP19_MOUSE	Isoform 2 of Pre-mRNA-processing factor 19 OS=Mus musculus GN=Prpf19	-1.126	0.013	14164950	12452126
CTR9_MOUSE	Isoform 2 of RNA polymerase-associated protein CTR9 homolog OS=Mus musculus GN=Ctr9	-1.127	0.35	863787	767600
BMI1_MOUSE	Polycomb complex protein BMI-1 OS=Mus musculus GN=Bmi1 PE=1 SV=1	-1.127	0.004	5740582	5095067
TM214_MOUSE	Transmembrane protein 214 OS=Mus musculus GN=Tmem214 PE=2 SV=1	-1.127	0.043	5827073	5258330
ZN143_MOUSE	Isoform 2 of Zinc finger protein 143 OS=Mus musculus GN=Znf143	-1.129	0.019	3.03605e+06	2.71072e+06
FLI1_MOUSE	Friend leukemia integration 1 transcription factor OS=Mus musculus GN=Fli1 PE=1 SV=1	-1.129	0.017	8872881	7756980
MED1_MOUSE	Mediator of RNA polymerase II transcription subunit 1 OS=Mus musculus GN=Med1 PE=1 SV=2	-1.13	0.385	2.10473e+06	1.75834e+06
CUL4B_MOUSE	Isoform 2 of Cullin-4B OS=Mus musculus GN=Cul4b	-1.132	0.135	1.41887e+06	1.25339e+06
NDC1_MOUSE	Nucleoporin NDC1 OS=Mus musculus GN=Tmem48 PE=1 SV=1	-1.132	1.826e-06	9436078	8174255
MED24_MOUSE	Mediator of RNA polymerase II transcription subunit 24 OS=Mus musculus GN=Med24 PE=1 SV=1	-1.133	0.09	1.59482e+06	1406824
CD37_MOUSE	Leukocyte antigen CD37 OS=Mus musculus GN=Cd37 PE=2 SV=1	-1.133	0.004	7229142	6382202
SEPT7_MOUSE	Septin-7 OS=Mus musculus GN=Sept7 PE=1 SV=1	-1.134	0.21	3029324	2696396
WLS_MOUSE	Protein wntless homolog OS=Mus musculus GN=Wls PE=1 SV=1	-1.135	0.056	10009080	8886335
SON_MOUSE	Protein SON OS=Mus musculus GN=Son PE=1 SV=1	-1.135	0.03	5900774	5.27126e+06
RFC3_MOUSE	Replication factor C subunit 3 OS=Mus musculus GN=Rfc3 PE=2 SV=1	-1.136	0.018	7.30898e+06	6523190
HAKAI_MOUSE	Isoform 2 of E3 ubiquitin-protein ligase Hakai OS=Mus musculus GN=Cbll1	-1.136	0.03	7539883	6.63958e+06
MRE11_MOUSE	Double-strand break repair protein MRE11A OS=Mus musculus GN=Mre11a PE=2 SV=1	-1.137	0.266	1.66474e+06	1.46515e+06
SNR40_MOUSE	U5 small nuclear ribonucleoprotein 40 kDa protein OS=Mus musculus GN=Snrnp40 PE=2 SV=1	-1.137	0.02	5111695	4433671
NUP88_MOUSE	Isoform 2 of Nuclear pore complex protein Nup88 OS=Mus musculus GN=Nup88	-1.137	0.025	3.23964e+06	2.88507e+06
DIDO1_MOUSE	Death-inducer obliterator 1 OS=Mus musculus GN=Dido1 PE=1 SV=4	-1.137	0.002	4466441	3.92446e+06
PTBP1_MOUSE	Polypyrimidine tract-binding protein 1 OS=Mus musculus GN=Ptbp1 PE=1 SV=2	-1.138	0.028	7.15831e+06	5.6876e+06
DX39B_MOUSE	Spliceosome RNA helicase Ddx39b OS=Mus musculus GN=Ddx39b PE=1 SV=1	-1.138	0.003	8097124	6999380
DHX9_MOUSE	Isoform 2 of ATP-dependent RNA helicase A OS=Mus musculus GN=Dhx9	-1.138	6.357e-05	9562451	8680860
RFC5_MOUSE	Replication factor C subunit 5 OS=Mus musculus GN=Rfc5 PE=2 SV=1	-1.138	0.033	3666681	3.22041e+06
CELF1_MOUSE	Isoform 2 of CUGBP Elav-like family member 1 OS=Mus musculus GN=Celf1	-1.139	0.151	3992185	3.29278e+06
KDM3B_MOUSE	Lysine-specific demethylase 3B OS=Mus musculus GN=Kdm3b PE=1 SV=2	-1.139	0.035	3.92709e+06	3.56997e+06
URP2_MOUSE	Fermitin family homolog 3 OS=Mus musculus GN=Fermt3 PE=1 SV=1	-1.14	0.111	8768244	8743545
FOXP4_MOUSE	Isoform 2 of Forkhead box protein P4 OS=Mus musculus GN=Foxp4	-1.14	0.048	4187204	3.7626e+06
CA103_MOUSE	Uncharacterized protein C1orf103 homolog OS=Mus musculus PE=2 SV=2	-1.141	0.0007092	3.83655e+06	3431531
TM7S3_MOUSE	Transmembrane 7 superfamily member 3 OS=Mus musculus GN=Tm7sf3 PE=2 SV=2	-1.141	0.154	2.42998e+06	2.12996e+06
F111A_MOUSE	Protein FAM111A OS=Mus musculus GN=Fam111a PE=2 SV=1	-1.143	0.234	1.00277e+06	877008
TCRG1_MOUSE	Transcription elongation regulator 1 OS=Mus musculus GN=Tcerg1 PE=1 SV=2	-1.143	0.332	5855276	5.23205e+06
SIA4C_MOUSE	CMP-N-acetylneuraminate-beta-galactosamide-alpha-2,3-sialyltransferase 4 OS=Mus musculus GN=St3gal4 PE=2 SV=1	-1.146	0.176	2.04802e+06	1.78934e+06
RPB2_MOUSE	DNA-directed RNA polymerase II subunit RPB2 OS=Mus musculus GN=Polr2b PE=2 SV=2	-1.146	0.124	4.6967e+06	4278048
SYT4_MOUSE	Synaptotagmin-4 OS=Mus musculus GN=Syt4 PE=2 SV=2	-1.146	0.038	7362647	6420096
SMD2_MOUSE	Small nuclear ribonucleoprotein Sm D2 OS=Mus musculus GN=Snrpd2 PE=2 SV=1	-1.147	0.244	2092719	2.06784e+06
RUVB1_MOUSE	RuvB-like 1 OS=Mus musculus GN=Ruvbl1 PE=1 SV=1	-1.147	0.044	3.38528e+06	2.96575e+06
DYL1_MOUSE	Dynein light chain 2, cytoplasmic OS=Mus musculus GN=Dynll2 PE=1 SV=1	-1.148	0.108	3.2872e+06	2773387
NOG1_MOUSE	Nucleolar GTP-binding protein 1 OS=Mus musculus GN=Gtpbp4 PE=2 SV=3	-1.149	0.001	10335295	8912661
NICA_MOUSE	Nicastrin OS=Mus musculus GN=Ncstn PE=1 SV=2	-1.149	0.157	3980535	3247288
DHX15_MOUSE	Putative pre-mRNA-splicing factor ATP-dependent RNA helicase DHX15 OS=Mus musculus GN=Dhx15 PE=2 SV=2	-1.15	0.004	10991688	9670543
RPF2_MOUSE	Ribosome production factor 2 homolog OS=Mus musculus GN=Rpf2 PE=2 SV=2	-1.153	3.475e-06	4523703	3.82364e+06
NXF1_MOUSE	Nuclear RNA export factor 1 OS=Mus musculus GN=Nxf1 PE=1 SV=2	-1.154	0.031	2325356	2.04536e+06
DIAP3_MOUSE	Protein diaphanous homolog 3 OS=Mus musculus GN=Diaph3 PE=2 SV=1	-1.154	0.007	5715763	4953082
ATAD1_MOUSE	ATPase family AAA domain-containing protein 1 OS=Mus musculus GN=Atad1 PE=1 SV=1	-1.154	0.505	156128	135246
NSA2_MOUSE	Ribosome biogenesis protein NSA2 homolog OS=Mus musculus GN=Nsa2 PE=2 SV=1	-1.154	0.07	5.21465e+06	4.6975e+06
PHF6_MOUSE	PHD finger protein 6 OS=Mus musculus GN=Phf6 PE=1 SV=1	-1.155	1.432e-07	3.37798e+06	2.94108e+06
FIP1_MOUSE	Isoform 2 of Pre-mRNA 3'-end-processing factor FIP1 OS=Mus musculus GN=Fip1l1	-1.156	0.007	9644892	8.2211e+06
WDR74_MOUSE	WD repeat-containing protein 74 OS=Mus musculus GN=Wdr74 PE=2 SV=1	-1.156	0.151	2.74396e+06	2.30058e+06
PHF12_MOUSE	PHD finger protein 12 OS=Mus musculus GN=Phf12 PE=2 SV=1	-1.157	0.167	1.92503e+06	1.66415e+06
EMIL2_MOUSE	EMILIN-2 OS=Mus musculus GN=Emilin2 PE=1 SV=1	-1.158	0.404	2200391	1.97144e+06
MS18B_MOUSE	Protein Mis18-beta OS=Mus musculus GN=Oip5 PE=2 SV=1	-1.158	0.618	95990.3	82837.2
E2F7_MOUSE	Transcription factor E2F7 OS=Mus musculus GN=E2f7 PE=2 SV=1	-1.16	0.573	168255	144973
ROAA_MOUSE	Heterogeneous nuclear ribonucleoprotein A/B OS=Mus musculus GN=Hnrnpab PE=1 SV=1	-1.16	0.0004128	6351809	5423575
IF6_MOUSE	Eukaryotic translation initiation factor 6 OS=Mus musculus GN=Eif6 PE=1 SV=2	-1.161	0.017	4.07116e+06	3355579
ZN148_MOUSE	Zinc finger protein 148 OS=Mus musculus GN=Znf148 PE=1 SV=2	-1.162	0.663	565827	484586
PHF2_MOUSE	PHD finger protein 2 OS=Mus musculus GN=Phf2 PE=1 SV=2	-1.162	0.105	2.58095e+06	2.22097e+06
CPSF1_MOUSE	Cleavage and polyadenylation specificity factor subunit 1 OS=Mus musculus GN=Cpsf1 PE=1 SV=1	-1.162	0.086	2103933	1775669
KC1A_MOUSE	Casein kinase I isoform alpha OS=Mus musculus GN=Csnk1a1 PE=2 SV=2	-1.163	0.007	3181749	2735403
INT7_MOUSE	Integrator complex subunit 7 OS=Mus musculus GN=Ints7 PE=1 SV=1	-1.163	0.136	5.84807e+06	5.5924e+06
XRN2_MOUSE	5'-3' exoribonuclease 2 OS=Mus musculus GN=Xrn2 PE=1 SV=1	-1.163	0.006	3511716	2.96786e+06
ILF3_MOUSE	Isoform 2 of Interleukin enhancer-binding factor 3 OS=Mus musculus GN=Ilf3	-1.163	0.004	5.15948e+06	4.33607e+06
INT12_MOUSE	Integrator complex subunit 12 OS=Mus musculus GN=Ints12 PE=1 SV=1	-1.164	0.215	2.07005e+06	1784669
SP2_MOUSE	Transcription factor Sp2 OS=Mus musculus GN=Sp2 PE=2 SV=2	-1.166	0.0008927	4.27785e+06	3.66788e+06
NUCL_MOUSE	Nucleolin OS=Mus musculus GN=Ncl PE=1 SV=2	-1.167	0.074	1.98594e+06	1.7024e+06
UHRF1_MOUSE	E3 ubiquitin-protein ligase UHRF1 OS=Mus musculus GN=Uhrf1 PE=1 SV=2	-1.168	0.119	6011874	5.04167e+06
PR40A_MOUSE	Pre-mRNA-processing factor 40 homolog A OS=Mus musculus GN=Prpf40a PE=1 SV=1	-1.168	0.045	4.90579e+06	4.25132e+06
RL11_MOUSE	60S ribosomal protein L11 OS=Mus musculus GN=Rpl11 PE=1 SV=4	-1.168	0.406	9217516	6929679
GABP1_MOUSE	Isoform 3 of GA-binding protein subunit beta-1 OS=Mus musculus GN=Gabpb1	-1.169	1.044e-06	4.36103e+06	3.70918e+06
SENP1_MOUSE	Sentrin-specific protease 1 OS=Mus musculus GN=Senp1 PE=2 SV=1	-1.169	0.001	1.81037e+06	1.56298e+06
WIZ_MOUSE	Isoform S of Protein Wiz OS=Mus musculus GN=Wiz	-1.169	0.019	2297625	1.87464e+06
ROA2_MOUSE	Heterogeneous nuclear ribonucleoproteins A2/B1 OS=Mus musculus GN=Hnrnpa2b1 PE=1 SV=2	-1.171	7.485e-05	11971545	10341287
TM9S2_MOUSE	Transmembrane 9 superfamily member 2 OS=Mus musculus GN=Tm9sf2 PE=2 SV=1	-1.172	5.934e-06	7088034	5.99844e+06
SRSF1_MOUSE	Isoform 2 of Serine/arginine-rich splicing factor 1 OS=Mus musculus GN=Srsf1	-1.172	0.015	4357055	3.72426e+06
MED13_MOUSE	Mediator of RNA polymerase II transcription subunit 13 OS=Mus musculus GN=Med13 PE=2 SV=1	-1.172	0.025	3011053	2567000
SLAF5_MOUSE	SLAM family member 5 OS=Mus musculus GN=Cd84 PE=1 SV=1	-1.173	0.016	3.10321e+06	2645488
INT2_MOUSE	Integrator complex subunit 2 OS=Mus musculus GN=Ints2 PE=2 SV=2	-1.174	0.191	2.82077e+06	2502106
ADNP_MOUSE	Activity-dependent neuroprotector homeobox protein OS=Mus musculus GN=Adnp PE=2 SV=1	-1.175	0.246	10774854	9037679
ENASE_MOUSE	Cytosolic endo-beta-N-acetylglucosaminidase OS=Mus musculus GN=Engase PE=2 SV=1	-1.176	0.0002892	1.52328e+06	1.28923e+06
SRSF7_MOUSE	Isoform 2 of Serine/arginine-rich splicing factor 7 OS=Mus musculus GN=Srsf7	-1.178	4.553e-06	3.78025e+06	3.20777e+06
IMB1_MOUSE	Importin subunit beta-1 OS=Mus musculus GN=Kpnb1 PE=1 SV=1	-1.178	0.032	8731161	7.27505e+06
DNLI1_MOUSE	DNA ligase 1 OS=Mus musculus GN=Lig1 PE=1 SV=2	-1.179	0.241	1.61416e+06	1.08864e+06
MBOA5_MOUSE	Lysophospholipid acyltransferase 5 OS=Mus musculus GN=Lpcat3 PE=1 SV=1	-1.179	2.626e-11	18576386	15759805
K1310_MOUSE	Isoform 2 of Uncharacterized protein KIAA1310 OS=Mus musculus GN=Kiaa1310	-1.18	0.026	5.25034e+06	4352664
MATR3_MOUSE	Matrin-3 OS=Mus musculus GN=Matr3 PE=1 SV=1	-1.18	0.0008354	3.34771e+06	2.81553e+06
UBC_MOUSE	Polyubiquitin-B OS=Mus musculus GN=Ubb PE=1 SV=1	-1.181	1.039e-08	40050680	33529748
PP2AA_MOUSE	Serine/threonine-protein phosphatase 2A catalytic subunit alpha isoform OS=Mus musculus GN=Ppp2ca PE=1 SV=1	-1.182	0.002	6.41912e+06	5511939
HMGB1_MOUSE	High mobility group protein B1 OS=Mus musculus GN=Hmgb1 PE=1 SV=2	-1.182	0.001	9031549	7.79562e+06
AF10_MOUSE	Protein AF-10 OS=Mus musculus GN=Mllt10 PE=1 SV=1	-1.182	0.059	4.38408e+06	3.71829e+06
U3IP2_MOUSE	U3 small nucleolar RNA-interacting protein 2 OS=Mus musculus GN=Rrp9 PE=1 SV=1	-1.184	0.334	6.16968e+06	5.55421e+06
CDK8_MOUSE	Isoform 3 of Cyclin-dependent kinase 8 OS=Mus musculus GN=Cdk8	-1.185	0.0002062	4860373	4.25196e+06
NUP53_MOUSE	Nucleoporin NUP53 OS=Mus musculus GN=Nup35 PE=1 SV=2	-1.186	0.007	3.20044e+06	2.66772e+06
TAF6L_MOUSE	TAF6-like RNA polymerase II p300/CBP-associated factor-associated factor 65 kDa subunit 6L OS=Mus musculus GN=Taf6l PE=2 SV=1	-1.186	0.088	877888	700419
MBNL2_MOUSE	Isoform 2 of Muscleblind-like protein 2 OS=Mus musculus GN=Mbnl2	-1.187	1.503e-13	13169498	11268859
ORC1_MOUSE	Origin recognition complex subunit 1 OS=Mus musculus GN=Orc1 PE=2 SV=1	-1.187	0.0002124	2.94782e+06	2.49425e+06
CDK1_MOUSE	Cyclin-dependent kinase 1 OS=Mus musculus GN=Cdk1 PE=1 SV=3	-1.187	0.006	2.03945e+06	1730706
NCOR1_MOUSE	Nuclear receptor corepressor 1 OS=Mus musculus GN=Ncor1 PE=1 SV=1	-1.188	0.003	3.20293e+06	2.82655e+06
ILF2_MOUSE	Interleukin enhancer-binding factor 2 OS=Mus musculus GN=Ilf2 PE=1 SV=1	-1.188	0.0001704	5621868	4577286
MGAT2_MOUSE	Alpha-1,6-mannosyl-glycoprotein 2-beta-N-acetylglucosaminyltransferase OS=Mus musculus GN=Mgat2 PE=2 SV=1	-1.188	0.002	8624033	7031368
RL27_MOUSE	60S ribosomal protein L27 OS=Mus musculus GN=Rpl27 PE=2 SV=2	-1.189	0.138	6887073	5940653
EMAL3_MOUSE	Echinoderm microtubule-associated protein-like 3 OS=Mus musculus GN=Eml3 PE=2 SV=1	-1.19	0.577	550561	461508
ROA3_MOUSE	Heterogeneous nuclear ribonucleoprotein A3 OS=Mus musculus GN=Hnrnpa3 PE=1 SV=1	-1.191	0.0005699	15390272	13009638
IMA3_MOUSE	Importin subunit alpha-3 OS=Mus musculus GN=Kpna3 PE=1 SV=1	-1.192	0.046	4.70629e+06	4175740
CCAR1_MOUSE	Isoform 3 of Cell division cycle and apoptosis regulator protein 1 OS=Mus musculus GN=Ccar1	-1.193	2.2e-05	11108341	9407560
APC1_MOUSE	Anaphase-promoting complex subunit 1 OS=Mus musculus GN=Anapc1 PE=1 SV=1	-1.194	0.096	1.49498e+06	1196011
EF1A1_MOUSE	Elongation factor 1-alpha 1 OS=Mus musculus GN=Eef1a1 PE=1 SV=3	-1.194	5.435e-19	38900624	32745876
MEF2A_MOUSE	Isoform 2 of Myocyte-specific enhancer factor 2A OS=Mus musculus GN=Mef2a	-1.194	6.774e-07	7628391	6388237
BRD8_MOUSE	Bromodomain-containing protein 8 OS=Mus musculus GN=Brd8 PE=1 SV=2	-1.197	2.743e-07	4955581	4139220
PACS1_MOUSE	Phosphofurin acidic cluster sorting protein 1 OS=Mus musculus GN=Pacs1 PE=1 SV=2	-1.198	0.212	2.72703e+06	2.27109e+06
SSRD_MOUSE	Translocon-associated protein subunit delta OS=Mus musculus GN=Ssr4 PE=2 SV=1	-1.2	0.002	4.03288e+06	3.37488e+06
S61A1_MOUSE	Protein transport protein Sec61 subunit alpha isoform 1 OS=Mus musculus GN=Sec61a1 PE=2 SV=2	-1.201	0.001	26241134	22196010
THOC6_MOUSE	THO complex subunit 6 homolog OS=Mus musculus GN=Thoc6 PE=2 SV=1	-1.202	0.269	3.19536e+06	2776929
IPRI_MOUSE	Inositol 1,4,5-triphosphate receptor-interacting protein OS=Mus musculus GN=Itprip PE=2 SV=1	-1.205	0.171	450288	373195
THOC5_MOUSE	THO complex subunit 5 homolog OS=Mus musculus GN=Thoc5 PE=1 SV=2	-1.207	0.073	2.18563e+06	1.81593e+06
RPB3_MOUSE	DNA-directed RNA polymerase II subunit RPB3 OS=Mus musculus GN=Polr2c PE=2 SV=1	-1.207	0.019	1.6156e+06	1.33878e+06
STAU1_MOUSE	Double-stranded RNA-binding protein Staufen homolog 1 OS=Mus musculus GN=Stau1 PE=2 SV=1	-1.208	3.003e-06	4320367	3577552
PSPC1_MOUSE	Paraspeckle component 1 OS=Mus musculus GN=Pspc1 PE=1 SV=1	-1.208	0.298	2.34903e+06	1.89056e+06
ERH_MOUSE	Enhancer of rudimentary homolog OS=Mus musculus GN=Erh PE=1 SV=1	-1.209	0.017	6.55017e+06	5411611
CF089_MOUSE	Uncharacterized protein C6orf89 homolog OS=Mus musculus PE=2 SV=2	-1.209	0.0002816	1.81239e+06	1.5071e+06
BAF_MOUSE	Barrier-to-autointegration factor OS=Mus musculus GN=Banf1 PE=1 SV=1	-1.21	0.001	8442474	6952152
UBC9_MOUSE	SUMO-conjugating enzyme UBC9 OS=Mus musculus GN=Ube2i PE=1 SV=1	-1.21	0.057	3.55768e+06	2.9404e+06
NFE2_MOUSE	Transcription factor NF-E2 45 kDa subunit OS=Mus musculus GN=Nfe2 PE=1 SV=1	-1.21	0.001	2.09861e+06	1.65199e+06
RAI1_MOUSE	Retinoic acid-induced protein 1 OS=Mus musculus GN=Rai1 PE=1 SV=2	-1.211	0.016	3.61744e+06	2.76924e+06
MAGT1_MOUSE	Isoform 2 of Magnesium transporter protein 1 OS=Mus musculus GN=Magt1	-1.211	0.003	7.48349e+06	6.28613e+06
DDB1_MOUSE	DNA damage-binding protein 1 OS=Mus musculus GN=Ddb1 PE=1 SV=2	-1.211	0.044	4674448	3.70501e+06
HNRH1_MOUSE	Heterogeneous nuclear ribonucleoprotein H OS=Mus musculus GN=Hnrnph1 PE=1 SV=3	-1.212	2.176e-07	13111343	11064879
ARHG2_MOUSE	Isoform 4 of Rho guanine nucleotide exchange factor 2 OS=Mus musculus GN=Arhgef2	-1.212	0.0004337	3.59796e+06	2.90657e+06
PELP1_MOUSE	Proline-, glutamic acid- and leucine-rich protein 1 OS=Mus musculus GN=Pelp1 PE=1 SV=2	-1.213	0.069	2.69785e+06	2136720
SK2L2_MOUSE	Superkiller viralicidic activity 2-like 2 OS=Mus musculus GN=Skiv2l2 PE=2 SV=1	-1.213	0.007	2.28933e+06	1.94446e+06
NRM_MOUSE	Nurim OS=Mus musculus GN=Nrm PE=2 SV=1	-1.214	8.45e-22	5178416	4261535
WDR18_MOUSE	WD repeat-containing protein 18 OS=Mus musculus GN=Wdr18 PE=2 SV=1	-1.215	0.015	2.73294e+06	2250077
SYF1_MOUSE	Pre-mRNA-splicing factor SYF1 OS=Mus musculus GN=Xab2 PE=2 SV=1	-1.215	0.001	1.71666e+06	1.41317e+06
RSMN_MOUSE	Small nuclear ribonucleoprotein-associated protein N OS=Mus musculus GN=Snrpn PE=2 SV=1	-1.215	7.603e-10	11806214	9876569
DDX27_MOUSE	Probable ATP-dependent RNA helicase DDX27 OS=Mus musculus GN=Ddx27 PE=1 SV=2	-1.215	0.02	2.24513e+06	1.8484e+06
PRP8_MOUSE	Pre-mRNA-processing-splicing factor 8 OS=Mus musculus GN=Prpf8 PE=1 SV=2	-1.215	1e-06	7.18729e+06	6.09331e+06
ERG_MOUSE	Transcriptional regulator ERG OS=Mus musculus GN=Erg PE=1 SV=2	-1.216	0.002	10224812	8.35149e+06
IF4A3_MOUSE	Eukaryotic initiation factor 4A-III OS=Mus musculus GN=Eif4a3 PE=1 SV=3	-1.217	0.014	2.08048e+06	1.82044e+06
RFC1_MOUSE	Replication factor C subunit 1 OS=Mus musculus GN=Rfc1 PE=1 SV=2	-1.217	0.028	1.02081e+06	846164
I2BPL_MOUSE	Interferon regulatory factor 2-binding protein-like OS=Mus musculus GN=Irf2bpl PE=1 SV=1	-1.217	0.013	1.65664e+06	1.35454e+06
NCOA5_MOUSE	Nuclear receptor coactivator 5 OS=Mus musculus GN=Ncoa5 PE=1 SV=1	-1.217	0.103	3.48623e+06	3.07272e+06
NACC1_MOUSE	Nucleus accumbens-associated protein 1 OS=Mus musculus GN=Nacc1 PE=2 SV=1	-1.218	0.261	2.89667e+06	2327218
LA_MOUSE	Lupus La protein homolog OS=Mus musculus GN=Ssb PE=2 SV=1	-1.219	0.088	1.83267e+06	1.4196e+06
VPP1_MOUSE	Isoform A1-I of V-type proton ATPase 116 kDa subunit a isoform 1 OS=Mus musculus GN=Atp6v0a1	-1.219	0.06	4291321	3.5299e+06
DHCR7_MOUSE	7-dehydrocholesterol reductase OS=Mus musculus GN=Dhcr7 PE=2 SV=1	-1.221	0.002	8334463	6677682
SNUT2_MOUSE	U4/U6.U5 tri-snRNP-associated protein 2 OS=Mus musculus GN=Usp39 PE=2 SV=2	-1.222	1.276e-09	1.84415e+06	1.53469e+06
SIDT2_MOUSE	SID1 transmembrane family member 2 OS=Mus musculus GN=Sidt2 PE=1 SV=1	-1.223	0.008	2292602	1874315
U5S1_MOUSE	116 kDa U5 small nuclear ribonucleoprotein component OS=Mus musculus GN=Eftud2 PE=2 SV=1	-1.223	4.911e-05	2.27675e+06	1.85883e+06
EF1D_MOUSE	Isoform 3 of Elongation factor 1-delta OS=Mus musculus GN=Eef1d	-1.223	0.0001656	4.09665e+06	3.44237e+06
MA2A1_MOUSE	Alpha-mannosidase 2 OS=Mus musculus GN=Man2a1 PE=1 SV=1	-1.224	0.005	2.65616e+06	2.22162e+06
RPN1_MOUSE	Dolichyl-diphosphooligosaccharide--protein glycosyltransferase subunit 1 OS=Mus musculus GN=Rpn1 PE=2 SV=1	-1.224	0.032	6756107	5.59821e+06
NOP16_MOUSE	Nucleolar protein 16 OS=Mus musculus GN=Nop16 PE=2 SV=1	-1.226	0.011	3.5368e+06	2896288
MGAP_MOUSE	Isoform 3 of MAX gene-associated protein OS=Mus musculus GN=Mga	-1.226	0.011	2.41263e+06	2.10505e+06
CHD8_MOUSE	Chromodomain-helicase-DNA-binding protein 8 OS=Mus musculus GN=Chd8 PE=1 SV=1	-1.226	0.121	2035610	1.65771e+06
ANM1_MOUSE	Isoform 2 of Protein arginine N-methyltransferase 1 OS=Mus musculus GN=Prmt1	-1.226	0.0009245	1.8905e+06	1.54161e+06
RBM26_MOUSE	Isoform 2 of RNA-binding protein 26 OS=Mus musculus GN=Rbm26	-1.231	0.0008331	6182106	4.91157e+06
FOXK1_MOUSE	Forkhead box protein K1 OS=Mus musculus GN=Foxk1 PE=1 SV=2	-1.231	0.003	10563879	8556792
MCM3_MOUSE	DNA replication licensing factor MCM3 OS=Mus musculus GN=Mcm3 PE=1 SV=2	-1.231	0.055	3.10735e+06	2.46872e+06
RFC4_MOUSE	Replication factor C subunit 4 OS=Mus musculus GN=Rfc4 PE=1 SV=1	-1.231	0.002	2.03323e+06	1610399
NPA1P_MOUSE	Nucleolar pre-ribosomal-associated protein 1 OS=Mus musculus GN=Urb1 PE=2 SV=2	-1.232	0.0007094	1.65324e+06	1381860
MPU1_MOUSE	Mannose-P-dolichol utilization defect 1 protein OS=Mus musculus GN=Mpdu1 PE=2 SV=1	-1.232	9.298e-05	3549787	2880796
CG026_MOUSE	Uncharacterized protein C7orf26 homolog OS=Mus musculus PE=2 SV=1	-1.232	0.008	1.94123e+06	1.57449e+06
NAA40_MOUSE	N-alpha-acetyltransferase 40, NatD catalytic subunit OS=Mus musculus GN=Naa40 PE=2 SV=1	-1.233	1.516e-11	5.41273e+06	4373299
BOP1_MOUSE	Ribosome biogenesis protein BOP1 OS=Mus musculus GN=Bop1 PE=1 SV=1	-1.234	0.119	4.08376e+06	3554236
APEX1_MOUSE	DNA-(apurinic or apyrimidinic site) lyase OS=Mus musculus GN=Apex1 PE=1 SV=2	-1.234	0.048	7.63964e+06	6.15579e+06
TADBP_MOUSE	TAR DNA-binding protein 43 OS=Mus musculus GN=Tardbp PE=1 SV=1	-1.234	0.004	4860909	4096007
CYFP1_MOUSE	Cytoplasmic FMR1-interacting protein 1 OS=Mus musculus GN=Cyfip1 PE=1 SV=1	-1.235	0.004	4211449	3.4497e+06
SAP_MOUSE	Sulfated glycoprotein 1 OS=Mus musculus GN=Psap PE=1 SV=2	-1.236	0.058	7.69287e+06	7.01745e+06
PCBP1_MOUSE	Poly(rC)-binding protein 1 OS=Mus musculus GN=Pcbp1 PE=1 SV=1	-1.236	0.001	8.35418e+06	6.3615e+06
DDX17_MOUSE	Probable ATP-dependent RNA helicase DDX17 OS=Mus musculus GN=Ddx17 PE=2 SV=1	-1.237	0.002	13426398	11119005
SF3B3_MOUSE	Splicing factor 3B subunit 3 OS=Mus musculus GN=Sf3b3 PE=2 SV=1	-1.241	0.008	6644418	5314838
SRS10_MOUSE	Isoform 2 of Serine/arginine-rich splicing factor 10 OS=Mus musculus GN=Srsf10	-1.242	0.017	813104	654868
NOL9_MOUSE	Isoform 2 of Polynucleotide 5'-hydroxyl-kinase NOL9 OS=Mus musculus GN=Nol9	-1.242	0.0002828	5.30912e+06	4275924
REEP4_MOUSE	Receptor expression-enhancing protein 4 OS=Mus musculus GN=Reep4 PE=2 SV=1	-1.243	0.031	2418502	1.94345e+06
MA2B1_MOUSE	Lysosomal alpha-mannosidase OS=Mus musculus GN=Man2b1 PE=2 SV=3	-1.244	8.062e-06	3.01359e+06	2.36645e+06
LRWD1_MOUSE	Leucine-rich repeat and WD repeat-containing protein 1 OS=Mus musculus GN=LRWD1 PE=2 SV=1	-1.245	0.065	3.02941e+06	2.72011e+06
HNRL2_MOUSE	Heterogeneous nuclear ribonucleoprotein U-like protein 2 OS=Mus musculus GN=Hnrnpul2 PE=1 SV=1	-1.245	0.022	1.77841e+06	1.42825e+06
U2AF1_MOUSE	Splicing factor U2AF 35 kDa subunit OS=Mus musculus GN=U2af1 PE=1 SV=4	-1.245	0.081	4141330	3324077
RU1C_MOUSE	U1 small nuclear ribonucleoprotein C OS=Mus musculus GN=Snrpc PE=2 SV=1	-1.246	0.009	6200683	4981160
TM131_MOUSE	Transmembrane protein 131 OS=Mus musculus GN=Tmem131 PE=1 SV=2	-1.246	0.213	828156	664130
DJC10_MOUSE	DnaJ homolog subfamily C member 10 OS=Mus musculus GN=Dnajc10 PE=1 SV=1	-1.248	0.135	2.46127e+06	1.9717e+06
HNRPU_MOUSE	Heterogeneous nuclear ribonucleoprotein U OS=Mus musculus GN=Hnrnpu PE=1 SV=1	-1.249	1.531e-17	29124930	23524088
ORC5_MOUSE	Origin recognition complex subunit 5 OS=Mus musculus GN=Orc5 PE=2 SV=1	-1.249	7.925e-06	3117261	2495251
ZEP2_MOUSE	Transcription factor HIVEP2 OS=Mus musculus GN=Hivep2 PE=1 SV=1	-1.25	0.046	2.59789e+06	2.12214e+06
CND1_MOUSE	Condensin complex subunit 1 OS=Mus musculus GN=Ncapd2 PE=1 SV=2	-1.251	0.0003774	978927	786972
PP1A_MOUSE	Serine/threonine-protein phosphatase PP1-alpha catalytic subunit OS=Mus musculus GN=Ppp1ca PE=1 SV=1	-1.252	0.0003067	14717363	11931324
K0240_MOUSE	Uncharacterized protein KIAA0240 OS=Mus musculus GN=Kiaa0240 PE=2 SV=2	-1.252	0.002	4686272	3.99959e+06
MOT1_MOUSE	Monocarboxylate transporter 1 OS=Mus musculus GN=Slc16a1 PE=1 SV=1	-1.257	0.082	4.86952e+06	3.91315e+06
ZFR_MOUSE	Zinc finger RNA-binding protein OS=Mus musculus GN=Zfr PE=1 SV=2	-1.258	5.266e-10	13458289	10810499
IMA2_MOUSE	Importin subunit alpha-2 OS=Mus musculus GN=Kpna2 PE=1 SV=2	-1.258	0.0004131	4644749	3.71103e+06
YIPF3_MOUSE	Protein YIPF3 OS=Mus musculus GN=Yipf3 PE=1 SV=1	-1.259	1.34e-05	11541814	9162166
DAD1_MOUSE	Dolichyl-diphosphooligosaccharide--protein glycosyltransferase subunit DAD1 OS=Mus musculus GN=Dad1 PE=2 SV=3	-1.259	0.02	9260755	7395361
ATAD2_MOUSE	ATPase family AAA domain-containing protein 2 OS=Mus musculus GN=Atad2 PE=1 SV=1	-1.259	0.005	2253665	1.78941e+06
GCP4_MOUSE	Gamma-tubulin complex component 4 OS=Mus musculus GN=Tubgcp4 PE=2 SV=2	-1.26	0.043	1.92623e+06	1.52921e+06
DX39A_MOUSE	ATP-dependent RNA helicase DDX39A OS=Mus musculus GN=Ddx39a PE=2 SV=1	-1.263	5.546e-12	4275387	3.45798e+06
CDK12_MOUSE	Isoform 2 of Cyclin-dependent kinase 12 OS=Mus musculus GN=Cdk12	-1.263	7.594e-06	3.71503e+06	3001065
MCM3A_MOUSE	80 kDa MCM3-associated protein OS=Mus musculus GN=Mcm3ap PE=2 SV=1	-1.263	0.484	5408728	4.94793e+06
TYDP1_MOUSE	Tyrosyl-DNA phosphodiesterase 1 OS=Mus musculus GN=Tdp1 PE=2 SV=2	-1.264	0.111	258851	211291
CDC5L_MOUSE	Cell division cycle 5-related protein OS=Mus musculus GN=Cdc5l PE=1 SV=2	-1.266	0.006	3.27047e+06	2578136
SF3A1_MOUSE	Splicing factor 3A subunit 1 OS=Mus musculus GN=Sf3a1 PE=1 SV=1	-1.267	6.127e-05	8068609	6.3602e+06
OSTC_MOUSE	Oligosaccharyltransferase complex subunit OSTC OS=Mus musculus GN=Ostc PE=2 SV=1	-1.269	3.518e-12	9705988	7649275
SRBP2_MOUSE	Sterol regulatory element-binding protein 2 OS=Mus musculus GN=Srebf2 PE=1 SV=2	-1.27	6.87e-05	3186358	2.51124e+06
U2AF2_MOUSE	Splicing factor U2AF 65 kDa subunit OS=Mus musculus GN=U2af2 PE=1 SV=3	-1.27	2.665e-07	4.19453e+06	3.23173e+06
FUS_MOUSE	RNA-binding protein FUS OS=Mus musculus GN=Fus PE=2 SV=1	-1.271	0.007	12650361	10048118
EPC1_MOUSE	Enhancer of polycomb homolog 1 OS=Mus musculus GN=Epc1 PE=2 SV=1	-1.271	0.024	2417605	1874840
SMD1_MOUSE	Small nuclear ribonucleoprotein Sm D1 OS=Mus musculus GN=Snrpd1 PE=2 SV=1	-1.271	0.047	1.88356e+06	1.53126e+06
MCM5_MOUSE	DNA replication licensing factor MCM5 OS=Mus musculus GN=Mcm5 PE=2 SV=1	-1.273	0.000804	5276078	4530300
OST48_MOUSE	Dolichyl-diphosphooligosaccharide--protein glycosyltransferase 48 kDa subunit OS=Mus musculus GN=Ddost PE=1 SV=1	-1.274	3.241e-07	7112037	5.62983e+06
SEPT2_MOUSE	Septin-2 OS=Mus musculus GN=Sept2 PE=1 SV=2	-1.275	0.005	2.79321e+06	2.05703e+06
MOGS_MOUSE	Mannosyl-oligosaccharide glucosidase OS=Mus musculus GN=Mogs PE=2 SV=1	-1.278	0.0004114	10981873	8536981
RAN_MOUSE	GTP-binding nuclear protein Ran OS=Mus musculus GN=Ran PE=1 SV=3	-1.278	4.852e-09	16570258	13259063
HNRPD_MOUSE	Isoform 2 of Heterogeneous nuclear ribonucleoprotein D0 OS=Mus musculus GN=Hnrnpd	-1.279	2.682e-05	6878995	5.16621e+06
ESPL1_MOUSE	Separin OS=Mus musculus GN=Espl1 PE=1 SV=1	-1.28	0.205	805216	628948
RAD21_MOUSE	Double-strand-break repair protein rad21 homolog OS=Mus musculus GN=Rad21 PE=1 SV=2	-1.28	0.004	3.06607e+06	2.37394e+06
ZCCHV_MOUSE	Zinc finger CCCH-type antiviral protein 1 OS=Mus musculus GN=Zc3hav1 PE=1 SV=1	-1.281	0.048	1.82768e+06	1426547
VAPA_MOUSE	Vesicle-associated membrane protein-associated protein A OS=Mus musculus GN=Vapa PE=1 SV=2	-1.282	6.396e-07	6480234	5166348
NCBP1_MOUSE	Nuclear cap-binding protein subunit 1 OS=Mus musculus GN=Ncbp1 PE=1 SV=2	-1.282	8.323e-05	11557100	8994638
NSD2_MOUSE	Probable histone-lysine N-methyltransferase NSD2 OS=Mus musculus GN=Whsc1 PE=2 SV=2	-1.284	0.436	2.31367e+06	2.06186e+06
HNRPF_MOUSE	Heterogeneous nuclear ribonucleoprotein F OS=Mus musculus GN=Hnrnpf PE=1 SV=3	-1.287	1.555e-15	16728207	13103721
I20L2_MOUSE	Interferon-stimulated 20 kDa exonuclease-like 2 OS=Mus musculus GN=Isg20l2 PE=2 SV=2	-1.287	0.024	1.95028e+06	1.38517e+06
PP2BB_MOUSE	Isoform 1 of Serine/threonine-protein phosphatase 2B catalytic subunit beta isoform OS=Mus musculus GN=Ppp3cb	-1.291	0.015	4701750	3647168
ROA1_MOUSE	Heterogeneous nuclear ribonucleoprotein A1 OS=Mus musculus GN=Hnrnpa1 PE=1 SV=2	-1.291	5.511e-08	12542500	10109456
EWS_MOUSE	RNA-binding protein EWS OS=Mus musculus GN=Ewsr1 PE=1 SV=1	-1.293	1.836e-14	20585220	16164340
DNM3B_MOUSE	Isoform 2 of DNA (cytosine-5)-methyltransferase 3B OS=Mus musculus GN=Dnmt3b	-1.293	1.395e-05	3.83425e+06	2970369
EPIPL_MOUSE	Epiplakin OS=Mus musculus GN=Eppk1 PE=1 SV=2	-1.293	2.827e-06	6975134	5.40374e+06
KISHA_MOUSE	Protein kish-A OS=Mus musculus GN=Tmem167a PE=2 SV=1	-1.293	4.503e-10	13705437	10685017
CCNK_MOUSE	Cyclin-K OS=Mus musculus GN=Ccnk PE=1 SV=2	-1.297	9.147e-08	7065313	5444676
SPNS2_MOUSE	Protein spinster homolog 2 OS=Mus musculus GN=Spns2 PE=2 SV=2	-1.298	0.463	191834	148402
MBNL3_MOUSE	Muscleblind-like protein 3 OS=Mus musculus GN=Mbnl3 PE=2 SV=1	-1.298	7.186e-10	4969244	3.82755e+06
MLEC_MOUSE	Malectin OS=Mus musculus GN=Mlec PE=2 SV=2	-1.298	2.096e-06	3090071	2.46261e+06
SF3A3_MOUSE	Splicing factor 3A subunit 3 OS=Mus musculus GN=Sf3a3 PE=2 SV=2	-1.299	2.556e-21	3.27293e+06	2.51956e+06
CD027_MOUSE	UPF0609 protein C4orf27 homolog OS=Mus musculus PE=2 SV=1	-1.301	0.001	2.48364e+06	1.94368e+06
LIMS1_MOUSE	LIM and senescent cell antigen-like-containing domain protein 1 OS=Mus musculus GN=Lims1 PE=1 SV=3	-1.303	1.202e-05	8591680	6598993
CLK4_MOUSE	Dual specificity protein kinase CLK1 OS=Mus musculus GN=Clk1 PE=1 SV=1	-1.303	0.0003568	2.54401e+06	1.95276e+06
MK67I_MOUSE	MKI67 FHA domain-interacting nucleolar phosphoprotein OS=Mus musculus GN=Mki67ip PE=2 SV=1	-1.303	0.002	3.76937e+06	2736390
SRSF3_MOUSE	Serine/arginine-rich splicing factor 3 OS=Mus musculus GN=Srsf3 PE=2 SV=1	-1.303	0.0003576	9281832	7.11704e+06
RAB7A_MOUSE	Ras-related protein Rab-7a OS=Mus musculus GN=Rab7a PE=1 SV=2	-1.305	0.004	4.92894e+06	3.71026e+06
PP1G_MOUSE	Serine/threonine-protein phosphatase PP1-gamma catalytic subunit OS=Mus musculus GN=Ppp1cc PE=1 SV=1	-1.305	3.126e-15	8.06011e+06	6151651
PGH1_MOUSE	Prostaglandin G/H synthase 1 OS=Mus musculus GN=Ptgs1 PE=2 SV=1	-1.306	3.644e-08	11676538	9024810
2AAA_MOUSE	Serine/threonine-protein phosphatase 2A 65 kDa regulatory subunit A alpha isoform OS=Mus musculus GN=Ppp2r1a PE=1 SV=3	-1.307	1.287e-07	5465762	4.19158e+06
SMD3_MOUSE	Small nuclear ribonucleoprotein Sm D3 OS=Mus musculus GN=Snrpd3 PE=1 SV=1	-1.31	1.124e-05	4.21117e+06	3142662
MBOA7_MOUSE	Lysophospholipid acyltransferase 7 OS=Mus musculus GN=Mboat7 PE=2 SV=1	-1.31	6.905e-11	8488829	6426001
FKBP8_MOUSE	Peptidyl-prolyl cis-trans isomerase FKBP8 OS=Mus musculus GN=Fkbp8 PE=1 SV=2	-1.311	0.089	2.20592e+06	2.29776e+06
K0090_MOUSE	Uncharacterized protein KIAA0090 OS=Mus musculus GN=Kiaa0090 PE=1 SV=1	-1.314	0.011	3225429	2.51735e+06
SMAP1_MOUSE	Stromal membrane-associated protein 1 OS=Mus musculus GN=Smap1 PE=1 SV=1	-1.319	0.006	5424794	4128199
SSRP1_MOUSE	FACT complex subunit SSRP1 OS=Mus musculus GN=Ssrp1 PE=1 SV=2	-1.32	0.096	3363484	2.75038e+06
GNL3_MOUSE	Guanine nucleotide-binding protein-like 3 OS=Mus musculus GN=Gnl3 PE=1 SV=2	-1.322	1.332e-07	2112945	1.70481e+06
CPSF3_MOUSE	Cleavage and polyadenylation specificity factor subunit 3 OS=Mus musculus GN=Cpsf3 PE=2 SV=1	-1.323	0.006	2254790	1.86722e+06
SF01_MOUSE	Isoform CW17E of Splicing factor 1 OS=Mus musculus GN=Sf1	-1.324	1.176e-23	24256044	18602542
DDX5_MOUSE	Probable ATP-dependent RNA helicase DDX5 OS=Mus musculus GN=Ddx5 PE=1 SV=1	-1.325	0.0001602	10927065	8244881
PRI2_MOUSE	DNA primase large subunit OS=Mus musculus GN=Prim2 PE=1 SV=1	-1.325	0.026	924021	696537
NPM_MOUSE	Nucleophosmin OS=Mus musculus GN=Npm1 PE=1 SV=1	-1.325	1.993e-14	15164443	11836053
PCBP2_MOUSE	Isoform 2 of Poly(rC)-binding protein 2 OS=Mus musculus GN=Pcbp2	-1.327	3.465e-06	6.75997e+06	5275879
BUD31_MOUSE	Protein BUD31 homolog OS=Mus musculus GN=Bud31 PE=2 SV=1	-1.328	1.491e-12	3.61828e+06	2712217
PHC3_MOUSE	Polyhomeotic-like protein 3 OS=Mus musculus GN=Phc3 PE=1 SV=1	-1.33	0.172	1.92958e+06	1.44902e+06
RAD50_MOUSE	Isoform 2 of DNA repair protein RAD50 OS=Mus musculus GN=Rad50	-1.331	0.122	571375	450866
STT3A_MOUSE	Dolichyl-diphosphooligosaccharide--protein glycosyltransferase subunit STT3A OS=Mus musculus GN=Stt3a PE=1 SV=1	-1.333	2.266e-18	24887896	18927836
RPR1B_MOUSE	Isoform 2 of Regulation of nuclear pre-mRNA domain-containing protein 1B OS=Mus musculus GN=Rprd1b	-1.334	0.009	524295	393116
KCC2G_MOUSE	Isoform 2 of Calcium/calmodulin-dependent protein kinase type II subunit gamma OS=Mus musculus GN=Camk2g	-1.336	0.0002964	1.92941e+06	1445363
THOC1_MOUSE	THO complex subunit 1 OS=Mus musculus GN=Thoc1 PE=1 SV=1	-1.34	0.002	2239101	1.67044e+06
TECR_MOUSE	Trans-2,3-enoyl-CoA reductase OS=Mus musculus GN=Tecr PE=1 SV=1	-1.345	1.232e-25	17448594	12742119
CLC2G_MOUSE	C-type lectin domain family 2 member D OS=Mus musculus GN=Clec2d PE=1 SV=1	-1.346	1.439e-11	3.41611e+06	2.53198e+06
LRC59_MOUSE	Leucine-rich repeat-containing protein 59 OS=Mus musculus GN=Lrrc59 PE=2 SV=1	-1.349	3.024e-24	11718296	8572698
SRSF9_MOUSE	Serine/arginine-rich splicing factor 9 OS=Mus musculus GN=Srsf9 PE=1 SV=1	-1.35	0.088	1.81754e+06	1148131
GPHR_MOUSE	Golgi pH regulator OS=Mus musculus GN=Gpr89a PE=2 SV=2	-1.35	0.0003841	1.35639e+06	1.00418e+06
DDX3X_MOUSE	ATP-dependent RNA helicase DDX3X OS=Mus musculus GN=Ddx3x PE=1 SV=3	-1.351	2.746e-08	5.30543e+06	3862715
RL10A_MOUSE	60S ribosomal protein L10a OS=Mus musculus GN=Rpl10a PE=1 SV=3	-1.353	7.14e-07	11666409	8602880
HACD3_MOUSE	3-hydroxyacyl-CoA dehydratase 3 OS=Mus musculus GN=ptplad1 PE=1 SV=2	-1.354	1.142e-10	6919104	5.13768e+06
DIMT1_MOUSE	Probable dimethyladenosine transferase OS=Mus musculus GN=Dimt1l PE=2 SV=1	-1.357	1.021e-08	2.34292e+06	1707435
SEP11_MOUSE	Isoform 2 of Septin-11 OS=Mus musculus GN=Sept11	-1.358	0.0003389	3627882	2655502
CISD2_MOUSE	CDGSH iron-sulfur domain-containing protein 2 OS=Mus musculus GN=Cisd2 PE=1 SV=1	-1.359	4.735e-05	4.62005e+06	3.38489e+06
MA2B2_MOUSE	Epididymis-specific alpha-mannosidase OS=Mus musculus GN=Man2b2 PE=2 SV=2	-1.36	0.019	1.48309e+06	1.09191e+06
DHC24_MOUSE	Delta(24)-sterol reductase OS=Mus musculus GN=Dhcr24 PE=2 SV=1	-1.362	2.593e-14	20784248	15333698
S35B2_MOUSE	Adenosine 3'-phospho 5'-phosphosulfate transporter 1 OS=Mus musculus GN=Slc35b2 PE=2 SV=1	-1.362	6.299e-05	5.74033e+06	4210316
EYA3_MOUSE	Eyes absent homolog 3 OS=Mus musculus GN=Eya3 PE=1 SV=1	-1.363	2.743e-15	4620235	3415111
GUC2G_MOUSE	Guanylate cyclase 2G OS=Mus musculus GN=Gucy2g PE=1 SV=1	-1.364	1.54e-07	29636478	21766256
PIGU_MOUSE	Phosphatidylinositol glycan anchor biosynthesis class U protein OS=Mus musculus GN=Pigu PE=2 SV=4	-1.365	0.001	3.23822e+06	2.31328e+06
CO044_MOUSE	UPF0464 protein C15orf44 homolog OS=Mus musculus PE=2 SV=1	-1.365	0.038	420208	307784
COX1_MOUSE	Cytochrome c oxidase subunit 1 OS=Mus musculus GN=Mtco1 PE=3 SV=1	-1.366	1.479e-11	6944176	5081767
RL35A_MOUSE	60S ribosomal protein L35a OS=Mus musculus GN=Rpl35a PE=2 SV=2	-1.372	0.0001754	22473314	15895392
CBP_MOUSE	CREB-binding protein OS=Mus musculus GN=Crebbp PE=1 SV=2	-1.372	1.185e-08	2.72025e+06	2072590
AMPM1_MOUSE	Methionine aminopeptidase 1 OS=Mus musculus GN=Metap1 PE=2 SV=1	-1.373	1.466e-08	5.10844e+06	3923273
GRP78_MOUSE	78 kDa glucose-regulated protein OS=Mus musculus GN=Hspa5 PE=1 SV=3	-1.374	0.029	7.06336e+06	4.96067e+06
RL18_MOUSE	60S ribosomal protein L18 OS=Mus musculus GN=Rpl18 PE=2 SV=3	-1.375	1.83e-35	35058460	25086732
PPWD1_MOUSE	Peptidylprolyl isomerase domain and WD repeat-containing protein 1 OS=Mus musculus GN=Ppwd1 PE=2 SV=1	-1.376	3.033e-06	1.70707e+06	1.23961e+06
MET10_MOUSE	Putative methyltransferase METT10D OS=Mus musculus GN=Mett10d PE=1 SV=1	-1.377	0.011	2.70687e+06	1.96611e+06
HCFC2_MOUSE	Host cell factor 2 OS=Mus musculus GN=Hcfc2 PE=1 SV=1	-1.378	0.062	1.11729e+06	801627
SO3A1_MOUSE	Solute carrier organic anion transporter family member 3A1 OS=Mus musculus GN=Slco3a1 PE=2 SV=1	-1.378	0.039	2600572	1.88419e+06
KDM1A_MOUSE	Lysine-specific histone demethylase 1A OS=Mus musculus GN=Kdm1a PE=1 SV=2	-1.379	1.138e-06	1.478e+06	1.07157e+06
CSTF3_MOUSE	Cleavage stimulation factor subunit 3 OS=Mus musculus GN=Cstf3 PE=1 SV=1	-1.381	0.0002917	1.50274e+06	1.05447e+06
RS3_MOUSE	40S ribosomal protein S3 OS=Mus musculus GN=Rps3 PE=1 SV=1	-1.385	0.013	7726482	5430907
SF3A2_MOUSE	Splicing factor 3A subunit 2 OS=Mus musculus GN=Sf3a2 PE=2 SV=2	-1.387	3.659e-05	2.93418e+06	2.20392e+06
CBLN4_MOUSE	Cerebellin-4 OS=Mus musculus GN=Cbln4 PE=1 SV=1	-1.389	3.269e-17	65174568	46931836
HNRPK_MOUSE	Isoform 2 of Heterogeneous nuclear ribonucleoprotein K OS=Mus musculus GN=Hnrnpk	-1.391	0.004	3570520	2.43237e+06
DHB12_MOUSE	Estradiol 17-beta-dehydrogenase 12 OS=Mus musculus GN=Hsd17b12 PE=2 SV=1	-1.393	1.324e-07	8503548	5.74598e+06
SPTC1_MOUSE	Serine palmitoyltransferase 1 OS=Mus musculus GN=Sptlc1 PE=2 SV=1	-1.394	0.0001361	3472128	2265769
CH055_MOUSE	UPF0670 protein C8orf55 homolog OS=Mus musculus PE=2 SV=1	-1.397	6.987e-08	9681558	7.11374e+06
AT2A3_MOUSE	Isoform SERCA3A of Sarcoplasmic/endoplasmic reticulum calcium ATPase 3 OS=Mus musculus GN=Atp2a3	-1.398	1.012e-13	9437351	6.73666e+06
FCERG_MOUSE	High affinity immunoglobulin epsilon receptor subunit gamma OS=Mus musculus GN=Fcer1g PE=1 SV=1	-1.402	0.0006229	5472561	3.90912e+06
RL37_MOUSE	60S ribosomal protein L37 OS=Mus musculus GN=Rpl37 PE=2 SV=3	-1.402	4.144e-08	5248035	3770145
RBM27_MOUSE	RNA-binding protein 27 OS=Mus musculus GN=Rbm27 PE=2 SV=2	-1.406	4.906e-10	8172051	5978341
RL34_MOUSE	60S ribosomal protein L34 OS=Mus musculus GN=Rpl34 PE=3 SV=2	-1.407	1.047e-05	6735966	4786286
SP4_MOUSE	Transcription factor Sp4 OS=Mus musculus GN=Sp4 PE=2 SV=1	-1.41	0.193	2094635	1.48654e+06
PORED_MOUSE	Probable polyprenol reductase OS=Mus musculus GN=Srd5a3 PE=2 SV=2	-1.411	0.0001889	1.78645e+06	1.26596e+06
CI114_MOUSE	Uncharacterized protein C9orf114 homolog OS=Mus musculus GN=D2Wsu81e PE=2 SV=1	-1.411	2.453e-12	3.57381e+06	2.53238e+06
ACSL1_MOUSE	Long-chain-fatty-acid--CoA ligase 1 OS=Mus musculus GN=Acsl1 PE=1 SV=1	-1.412	8.754e-07	4.36587e+06	3.09096e+06
AMPM2_MOUSE	Methionine aminopeptidase 2 OS=Mus musculus GN=Metap2 PE=1 SV=1	-1.414	1.954e-08	8890758	6325050
PKN1_MOUSE	Serine/threonine-protein kinase N1 OS=Mus musculus GN=Pkn1 PE=1 SV=3	-1.414	5.927e-09	10970085	7.76748e+06
RL3_MOUSE	60S ribosomal protein L3 OS=Mus musculus GN=Rpl3 PE=2 SV=2	-1.415	2.15e-20	22918168	15935362
RAB10_MOUSE	Ras-related protein Rab-10 OS=Mus musculus GN=Rab10 PE=1 SV=1	-1.419	0.0004516	4236505	2988932
DNJC2_MOUSE	DnaJ homolog subfamily C member 2 OS=Mus musculus GN=Dnajc2 PE=1 SV=2	-1.421	0.002	895805	630115
WAC_MOUSE	WW domain-containing adapter protein with coiled-coil OS=Mus musculus GN=Wac PE=1 SV=2	-1.422	1.321e-10	8.30572e+06	5821843
RAB5C_MOUSE	Ras-related protein Rab-5C OS=Mus musculus GN=Rab5c PE=1 SV=2	-1.424	0.025	4.6338e+06	3268264
S39A7_MOUSE	Zinc transporter SLC39A7 OS=Mus musculus GN=Slc39a7 PE=1 SV=2	-1.424	1.283e-10	10342915	6.8745e+06
TRAM1_MOUSE	Translocating chain-associated membrane protein 1 OS=Mus musculus GN=Tram1 PE=1 SV=3	-1.426	0	10779444	7.56712e+06
SAC1_MOUSE	Phosphatidylinositide phosphatase SAC1 OS=Mus musculus GN=Sacm1l PE=2 SV=1	-1.428	3.301e-13	6.35298e+06	4.53697e+06
CPSF6_MOUSE	Cleavage and polyadenylation specificity factor subunit 6 OS=Mus musculus GN=Cpsf6 PE=1 SV=1	-1.429	7.441e-06	1.22961e+06	860248
EST5A_MOUSE	Carboxylesterase 5A OS=Mus musculus GN=Ces5a PE=2 SV=1	-1.429	3.211e-13	5269041	3.68794e+06
ACATN_MOUSE	Acetyl-coenzyme A transporter 1 OS=Mus musculus GN=Slc33a1 PE=1 SV=1	-1.434	2.681e-07	1386184	966468
RDH11_MOUSE	Retinol dehydrogenase 11 OS=Mus musculus GN=Rdh11 PE=2 SV=2	-1.436	3.543e-12	11345266	7823404
ERLN2_MOUSE	Erlin-2 OS=Mus musculus GN=Erlin2 PE=1 SV=1	-1.436	0.0003539	5.22002e+06	3554588
VWF_MOUSE	von Willebrand factor OS=Mus musculus GN=Vwf PE=1 SV=2	-1.436	9.245e-16	7642225	5319224
TM9S3_MOUSE	Transmembrane 9 superfamily member 3 OS=Mus musculus GN=Tm9sf3 PE=1 SV=1	-1.438	1.48e-06	15029373	10489114
XPO1_MOUSE	Exportin-1 OS=Mus musculus GN=Xpo1 PE=1 SV=1	-1.438	2.568e-13	4.14934e+06	3.03343e+06
RL32_MOUSE	60S ribosomal protein L32 OS=Mus musculus GN=Rpl32 PE=2 SV=2	-1.439	7.173e-19	11970270	8135851
TMM33_MOUSE	Transmembrane protein 33 OS=Mus musculus GN=Tmem33 PE=2 SV=1	-1.439	2.495e-14	7017521	4677963
LMAN2_MOUSE	Vesicular integral-membrane protein VIP36 OS=Mus musculus GN=Lman2 PE=2 SV=1	-1.443	4.207e-13	18036730	12638160
IF2G_MOUSE	Eukaryotic translation initiation factor 2 subunit 3, X-linked OS=Mus musculus GN=Eif2s3x PE=1 SV=2	-1.443	0.066	3.81787e+06	2634936
YIF1B_MOUSE	Protein YIF1B OS=Mus musculus GN=Yif1b PE=2 SV=2	-1.443	1.959e-21	8937858	6.19251e+06
SEPT9_MOUSE	Isoform 2 of Septin-9 OS=Mus musculus GN=Sept9	-1.444	0.0008013	2.86239e+06	1.97798e+06
RL7A_MOUSE	60S ribosomal protein L7a OS=Mus musculus GN=Rpl7a PE=2 SV=2	-1.447	3.57e-10	9299562	6230186
THAS_MOUSE	Thromboxane-A synthase OS=Mus musculus GN=Tbxas1 PE=2 SV=2	-1.448	0.0001882	1.28543e+06	888228
ALG8_MOUSE	Probable dolichyl pyrophosphate Glc1Man9GlcNAc2 alpha-1,3-glucosyltransferase OS=Mus musculus GN=Alg8 PE=2 SV=1	-1.449	1.154e-08	7113576	4902065
YTHD1_MOUSE	YTH domain family protein 1 OS=Mus musculus GN=Ythdf1 PE=2 SV=1	-1.449	0.003	5657504	3559527
ECHM_MOUSE	Enoyl-CoA hydratase, mitochondrial OS=Mus musculus GN=Echs1 PE=1 SV=1	-1.452	0.044	1.78245e+06	1224581
RBM19_MOUSE	Probable RNA-binding protein 19 OS=Mus musculus GN=Rbm19 PE=1 SV=1	-1.458	0.001	184386	125905
RL4_MOUSE	60S ribosomal protein L4 OS=Mus musculus GN=Rpl4 PE=1 SV=3	-1.459	0	29733754	20695886
AT2A2_MOUSE	Sarcoplasmic/endoplasmic reticulum calcium ATPase 2 OS=Mus musculus GN=Atp2a2 PE=1 SV=2	-1.464	3.13e-12	8.01712e+06	5.65593e+06
FBX38_MOUSE	F-box only protein 38 OS=Mus musculus GN=Fbxo38 PE=1 SV=1	-1.465	0.12	221910	151305
ACSL3_MOUSE	Long-chain-fatty-acid--CoA ligase 3 OS=Mus musculus GN=Acsl3 PE=2 SV=1	-1.465	2.011e-18	2.70406e+06	1844484
DERL1_MOUSE	Derlin-1 OS=Mus musculus GN=Derl1 PE=2 SV=1	-1.469	1.053e-15	7704294	5.24526e+06
DOPP1_MOUSE	Dolichyldiphosphatase 1 OS=Mus musculus GN=Dolpp1 PE=2 SV=1	-1.472	8.831e-12	1.03533e+06	708230
TPSN_MOUSE	Tapasin OS=Mus musculus GN=Tapbp PE=2 SV=2	-1.473	4.214e-14	6.46028e+06	4383860
CATA_MOUSE	Catalase OS=Mus musculus GN=Cat PE=1 SV=3	-1.475	0.008	5324522	3.58802e+06
SYFB_MOUSE	Phenylalanyl-tRNA synthetase beta chain OS=Mus musculus GN=Farsb PE=2 SV=1	-1.476	7.738e-15	2.63331e+06	1.76342e+06
STT3B_MOUSE	Dolichyl-diphosphooligosaccharide--protein glycosyltransferase subunit STT3B OS=Mus musculus GN=Stt3b PE=1 SV=2	-1.476	1.473e-35	22995124	15960610
ATLA3_MOUSE	Atlastin-3 OS=Mus musculus GN=Atl3 PE=2 SV=1	-1.477	1.51e-06	2.27646e+06	1.56154e+06
RS28_MOUSE	40S ribosomal protein S28 OS=Mus musculus GN=Rps28 PE=2 SV=1	-1.481	0.000547	4219036	2847816
SPTC2_MOUSE	Serine palmitoyltransferase 2 OS=Mus musculus GN=Sptlc2 PE=2 SV=2	-1.482	1.376e-09	3.81048e+06	2552861
HNRPQ_MOUSE	Heterogeneous nuclear ribonucleoprotein Q OS=Mus musculus GN=Syncrip PE=1 SV=2	-1.482	1.374e-05	3785601	2.47202e+06
LFNG_MOUSE	Beta-1,3-N-acetylglucosaminyltransferase lunatic fringe OS=Mus musculus GN=Lfng PE=1 SV=1	-1.483	0.012	1.47282e+06	991199
FANCI_MOUSE	Fanconi anemia group I protein homolog OS=Mus musculus GN=Fanci PE=1 SV=2	-1.485	1.586e-08	4340157	2.90186e+06
NCPR_MOUSE	NADPH--cytochrome P450 reductase OS=Mus musculus GN=Por PE=1 SV=2	-1.486	4.773e-07	3.94917e+06	2.71866e+06
ATN1_MOUSE	Atrophin-1 OS=Mus musculus GN=Atn1 PE=1 SV=1	-1.486	4.247e-05	3.12499e+06	2.10069e+06
TMCO1_MOUSE	Transmembrane and coiled-coil domain-containing protein 1 OS=Mus musculus GN=Tmco1 PE=2 SV=1	-1.492	7.554e-21	6.04425e+06	4.05053e+06
TRI33_MOUSE	E3 ubiquitin-protein ligase TRIM33 OS=Mus musculus GN=Trim33 PE=2 SV=2	-1.493	0.006	2.2957e+06	1.44697e+06
BTK_MOUSE	Tyrosine-protein kinase BTK OS=Mus musculus GN=Btk PE=1 SV=4	-1.5	0.049	1.95221e+06	1.29137e+06
HXK2_MOUSE	Hexokinase-2 OS=Mus musculus GN=Hk2 PE=1 SV=1	-1.501	0.000298	3.08317e+06	2.04073e+06
CMC1_MOUSE	Calcium-binding mitochondrial carrier protein Aralar1 OS=Mus musculus GN=Slc25a12 PE=1 SV=1	-1.501	2.975e-06	3.10064e+06	2.00873e+06
GT251_MOUSE	Procollagen galactosyltransferase 1 OS=Mus musculus GN=Glt25d1 PE=1 SV=2	-1.501	2.43e-13	4.4038e+06	2869075
GLE1_MOUSE	Nucleoporin GLE1 OS=Mus musculus GN=Gle1 PE=2 SV=2	-1.503	0.01	675217	449623
ERO1A_MOUSE	ERO1-like protein alpha OS=Mus musculus GN=Ero1l PE=1 SV=2	-1.505	1.828e-08	2917164	1.92138e+06
RL18A_MOUSE	60S ribosomal protein L18a OS=Mus musculus GN=Rpl18a PE=1 SV=1	-1.506	0	34823156	22864178
RL15_MOUSE	60S ribosomal protein L15 OS=Mus musculus GN=Rpl15 PE=2 SV=4	-1.507	1.845e-14	17554324	11889267
TERA_MOUSE	Transitional endoplasmic reticulum ATPase OS=Mus musculus GN=Vcp PE=1 SV=4	-1.509	0.0004847	3717236	2459729
DPOLA_MOUSE	DNA polymerase alpha catalytic subunit OS=Mus musculus GN=Pola1 PE=1 SV=2	-1.509	0.018	1.60344e+06	1.06188e+06
TS101_MOUSE	Tumor susceptibility gene 101 protein OS=Mus musculus GN=Tsg101 PE=1 SV=2	-1.511	5.696e-18	3434583	2.27239e+06
ERD21_MOUSE	ER lumen protein retaining receptor 1 OS=Mus musculus GN=Kdelr1 PE=2 SV=1	-1.511	7.191e-06	3.288e+06	2.11275e+06
EFTS_MOUSE	Elongation factor Ts, mitochondrial OS=Mus musculus GN=Tsfm PE=2 SV=1	-1.515	0.298	1.01111e+06	654987
CATB_MOUSE	Cathepsin B OS=Mus musculus GN=Ctsb PE=1 SV=2	-1.518	0.007	2728689	2097304
ACOD2_MOUSE	Acyl-CoA desaturase 1 OS=Mus musculus GN=Scd1 PE=1 SV=2	-1.519	2.602e-20	3.96465e+06	2.60584e+06
BRI3B_MOUSE	BRI3-binding protein OS=Mus musculus GN=Bri3bp PE=2 SV=1	-1.521	1.912e-09	6386941	4.38246e+06
RS3A_MOUSE	40S ribosomal protein S3a OS=Mus musculus GN=Rps3a PE=1 SV=3	-1.525	2.226e-05	5114601	2.96053e+06
TAP2_MOUSE	Antigen peptide transporter 2 OS=Mus musculus GN=Tap2 PE=2 SV=1	-1.527	4.718e-17	1.1203e+06	731020
GPDM_MOUSE	Glycerol-3-phosphate dehydrogenase, mitochondrial OS=Mus musculus GN=Gpd2 PE=1 SV=2	-1.528	0.145	729857	608405
RS23_MOUSE	40S ribosomal protein S23 OS=Mus musculus GN=Rps23 PE=2 SV=3	-1.529	0	12078644	7.8989e+06
TXD11_MOUSE	Thioredoxin domain-containing protein 11 OS=Mus musculus GN=Txndc11 PE=2 SV=1	-1.529	0.006	358298	234388
COPA_MOUSE	Coatomer subunit alpha OS=Mus musculus GN=Copa PE=1 SV=1	-1.53	1.238e-10	3433016	2.3361e+06
RL23_MOUSE	60S ribosomal protein L23 OS=Mus musculus GN=Rpl23 PE=1 SV=1	-1.532	0	6986151	4513668
LYAR_MOUSE	Cell growth-regulating nucleolar protein OS=Mus musculus GN=Lyar PE=1 SV=2	-1.532	0.001	2.12456e+06	1503906
SURF4_MOUSE	Surfeit locus protein 4 OS=Mus musculus GN=Surf4 PE=2 SV=1	-1.532	2.903e-08	1.83696e+06	1.22e+06
RAB1A_MOUSE	Ras-related protein Rab-1A OS=Mus musculus GN=Rab1A PE=1 SV=3	-1.534	1.206e-07	1893094	1.23337e+06
FUBP2_MOUSE	Far upstream element-binding protein 2 OS=Mus musculus GN=Khsrp PE=1 SV=1	-1.534	5.005e-13	4.4829e+06	2.81097e+06
PA2G4_MOUSE	Proliferation-associated protein 2G4 OS=Mus musculus GN=Pa2g4 PE=1 SV=3	-1.534	5.119e-05	3202214	2.08499e+06
RL14_MOUSE	60S ribosomal protein L14 OS=Mus musculus GN=Rpl14 PE=2 SV=3	-1.535	0	11306641	7.35706e+06
PIGO_MOUSE	GPI ethanolamine phosphate transferase 3 OS=Mus musculus GN=Pigo PE=1 SV=2	-1.537	7.789e-08	1.77605e+06	1.18278e+06
NSDHL_MOUSE	Sterol-4-alpha-carboxylate 3-dehydrogenase, decarboxylating OS=Mus musculus GN=Nsdhl PE=2 SV=1	-1.539	2.501e-18	4.6487e+06	3.15572e+06
RS5_MOUSE	40S ribosomal protein S5 OS=Mus musculus GN=Rps5 PE=2 SV=3	-1.543	8.405e-25	6469443	4.15517e+06
CSK21_MOUSE	Casein kinase II subunit alpha OS=Mus musculus GN=Csnk2a1 PE=2 SV=1	-1.543	5.538e-11	10071801	6463911
RS11_MOUSE	40S ribosomal protein S11 OS=Mus musculus GN=Rps11 PE=2 SV=3	-1.544	1.52e-14	6335403	4.2665e+06
SYVN1_MOUSE	E3 ubiquitin-protein ligase synoviolin OS=Mus musculus GN=Syvn1 PE=1 SV=3	-1.544	2.02e-21	9061827	5867708
RS12_MOUSE	40S ribosomal protein S12 OS=Mus musculus GN=Rps12 PE=1 SV=2	-1.545	6.345e-12	8320726	5.37986e+06
ZNT6_MOUSE	Zinc transporter 6 OS=Mus musculus GN=Slc30a6 PE=1 SV=1	-1.546	0.021	1714228	1114860
NU5M_MOUSE	NADH-ubiquinone oxidoreductase chain 5 OS=Mus musculus GN=Mtnd5 PE=2 SV=2	-1.547	0.0003415	509666	329466
DHB4_MOUSE	Peroxisomal multifunctional enzyme type 2 OS=Mus musculus GN=Hsd17b4 PE=1 SV=3	-1.548	0.008	3.16068e+06	1.89985e+06
FACR1_MOUSE	Isoform 4 of Fatty acyl-CoA reductase 1 OS=Mus musculus GN=Far1	-1.551	7.568e-37	7998844	5205983
GRN_MOUSE	Granulins OS=Mus musculus GN=Grn PE=1 SV=2	-1.551	0.006	1.65305e+06	1260559
DDX24_MOUSE	ATP-dependent RNA helicase DDX24 OS=Mus musculus GN=Ddx24 PE=1 SV=1	-1.553	8.157e-12	2216214	1.32243e+06
RS6_MOUSE	40S ribosomal protein S6 OS=Mus musculus GN=Rps6 PE=1 SV=1	-1.553	1.857e-20	22919440	14752440
LMF2_MOUSE	Lipase maturation factor 2 OS=Mus musculus GN=Lmf2 PE=2 SV=1	-1.554	1.428e-21	4241922	2734165
ELOV1_MOUSE	Elongation of very long chain fatty acids protein 1 OS=Mus musculus GN=Elovl1 PE=2 SV=1	-1.554	0.0001303	1.47258e+06	946061
MYPT1_MOUSE	Protein phosphatase 1 regulatory subunit 12A OS=Mus musculus GN=Ppp1r12a PE=1 SV=2	-1.555	1.129e-09	3.32294e+06	2.23952e+06
RL21_MOUSE	60S ribosomal protein L21 OS=Mus musculus GN=Rpl21 PE=2 SV=3	-1.557	0	19808290	12690897
ITB2_MOUSE	Integrin beta-2 OS=Mus musculus GN=Itgb2 PE=2 SV=2	-1.56	1.089e-13	5534550	3606171
RBPS2_MOUSE	RNA-binding protein with multiple splicing 2 OS=Mus musculus GN=Rbpms2 PE=1 SV=1	-1.56	5.754e-06	7.48566e+06	4.69096e+06
TAP1_MOUSE	Antigen peptide transporter 1 OS=Mus musculus GN=Tap1 PE=2 SV=2	-1.562	1.397e-15	3.39065e+06	2.14185e+06
GPAA1_MOUSE	Glycosylphosphatidylinositol anchor attachment 1 protein OS=Mus musculus GN=Gpaa1 PE=1 SV=3	-1.565	1.442e-12	5583079	3.61043e+06
RL7_MOUSE	60S ribosomal protein L7 OS=Mus musculus GN=Rpl7 PE=2 SV=2	-1.566	0	19542550	12427845
RL6_MOUSE	60S ribosomal protein L6 OS=Mus musculus GN=Rpl6 PE=1 SV=3	-1.572	4.384e-41	21005342	13354334
RL27A_MOUSE	60S ribosomal protein L27a OS=Mus musculus GN=Rpl27a PE=2 SV=5	-1.572	0	51644080	32784166
SGPL1_MOUSE	Sphingosine-1-phosphate lyase 1 OS=Mus musculus GN=Sgpl1 PE=2 SV=1	-1.575	3.456e-07	783619	497553
RS8_MOUSE	40S ribosomal protein S8 OS=Mus musculus GN=Rps8 PE=1 SV=2	-1.576	7.137e-33	15486407	9786060
ABHGA_MOUSE	Abhydrolase domain-containing protein 16A OS=Mus musculus GN=Abhd16a PE=1 SV=3	-1.577	3.841e-10	6399968	4.05699e+06
PDIA6_MOUSE	Protein disulfide-isomerase A6 OS=Mus musculus GN=Pdia6 PE=1 SV=3	-1.579	0.089	1.19807e+06	899396
HS2ST_MOUSE	Heparan sulfate 2-O-sulfotransferase 1 OS=Mus musculus GN=Hs2st1 PE=1 SV=2	-1.58	0.002	1.96321e+06	1.23887e+06
RS9_MOUSE	40S ribosomal protein S9 OS=Mus musculus GN=Rps9 PE=2 SV=3	-1.581	4.41e-11	10449498	6.59462e+06
RL13_MOUSE	60S ribosomal protein L13 OS=Mus musculus GN=Rpl13 PE=2 SV=3	-1.585	6.143e-30	14511205	9301150
IF5A1_MOUSE	Eukaryotic translation initiation factor 5A-1 OS=Mus musculus GN=Eif5a PE=1 SV=2	-1.586	4.094e-09	2.85905e+06	1.80326e+06
PIGN_MOUSE	Isoform 2 of GPI ethanolamine phosphate transferase 1 OS=Mus musculus GN=Pign	-1.588	1.923e-13	4.806e+06	3.10319e+06
IPYR2_MOUSE	Inorganic pyrophosphatase 2, mitochondrial OS=Mus musculus GN=Ppa2 PE=2 SV=1	-1.589	0.0001089	4668153	2729589
UBP3_MOUSE	Ubiquitin carboxyl-terminal hydrolase 3 OS=Mus musculus GN=Usp3 PE=2 SV=1	-1.593	0.031	3.11329e+06	2247108
RL5_MOUSE	60S ribosomal protein L5 OS=Mus musculus GN=Rpl5 PE=1 SV=3	-1.594	1.441e-12	8432806	5.63617e+06
HSP7C_MOUSE	Heat shock cognate 71 kDa protein OS=Mus musculus GN=Hspa8 PE=1 SV=1	-1.595	0	7.16473e+06	4516701
KC1D_MOUSE	Casein kinase I isoform delta OS=Mus musculus GN=Csnk1d PE=1 SV=2	-1.596	0.0006615	2.88814e+06	1.80787e+06
DPOD2_MOUSE	DNA polymerase delta subunit 2 OS=Mus musculus GN=Pold2 PE=2 SV=1	-1.596	1.756e-05	1.558e+06	976388
AT131_MOUSE	Probable cation-transporting ATPase 13A1 OS=Mus musculus GN=Atp13a1 PE=1 SV=1	-1.596	0.0001618	4.27009e+06	2822499
NSUN2_MOUSE	tRNA (cytosine-5-)-methyltransferase NSUN2 OS=Mus musculus GN=Nsun2 PE=1 SV=2	-1.602	0.005	1.76878e+06	1.20263e+06
ILVBL_MOUSE	Isoform 2 of Acetolactate synthase-like protein OS=Mus musculus GN=Ilvbl	-1.603	0.002	681721	411187
RL7L_MOUSE	60S ribosomal protein L7-like 1 OS=Mus musculus GN=Rpl7l1 PE=2 SV=1	-1.605	2.098e-05	1.6508e+06	1.02751e+06
RS4X_MOUSE	40S ribosomal protein S4, X isoform OS=Mus musculus GN=Rps4x PE=2 SV=2	-1.606	1.35e-13	10102947	6497602
NO66_MOUSE	Lysine-specific demethylase NO66 OS=Mus musculus GN=No66 PE=1 SV=2	-1.607	0.029	998540	653802
FADS1_MOUSE	Fatty acid desaturase 1 OS=Mus musculus GN=Fads1 PE=2 SV=1	-1.608	1.485e-36	9763312	5.85006e+06
SAM50_MOUSE	Sorting and assembly machinery component 50 homolog OS=Mus musculus GN=Samm50 PE=1 SV=1	-1.613	4.962e-14	3.40992e+06	2.07452e+06
AL1A7_MOUSE	Retinal dehydrogenase 1 OS=Mus musculus GN=Aldh1a1 PE=1 SV=5	-1.615	7.801e-06	20872998	12681216
ARC1B_MOUSE	Actin-related protein 2/3 complex subunit 1B OS=Mus musculus GN=Arpc1b PE=1 SV=3	-1.615	0.0001643	4.17183e+06	2596768
LRRK1_MOUSE	Uncharacterized protein KIAA0753 OS=Mus musculus GN=Kiaa0753 PE=2 SV=2	-1.617	1.171e-07	5043583	3.12179e+06
ESYT1_MOUSE	Extended synaptotagmin-1 OS=Mus musculus GN=Esyt1 PE=2 SV=2	-1.62	1.457e-43	3.81926e+06	2.36828e+06
VDAC2_MOUSE	Voltage-dependent anion-selective channel protein 2 OS=Mus musculus GN=Vdac2 PE=1 SV=2	-1.625	1.109e-12	8290236	5.06399e+06
RS15A_MOUSE	40S ribosomal protein S15a OS=Mus musculus GN=Rps15a PE=2 SV=2	-1.627	3.865e-08	9368509	6.76425e+06
VIME_MOUSE	Vimentin OS=Mus musculus GN=Vim PE=1 SV=3	-1.629	1.776e-05	2.85063e+06	1.71165e+06
RL30_MOUSE	60S ribosomal protein L30 OS=Mus musculus GN=Rpl30 PE=2 SV=2	-1.63	1.702e-26	5.82467e+06	3.49757e+06
PRP4_MOUSE	U4/U6 small nuclear ribonucleoprotein Prp4 OS=Mus musculus GN=Prpf4 PE=2 SV=1	-1.631	0.001	2686089	1645431
CYC_MOUSE	Cytochrome c, somatic OS=Mus musculus GN=Cycs PE=1 SV=2	-1.633	0.0004846	4838299	3.50112e+06
CQ062_MOUSE	Uncharacterized protein C17orf62 homolog OS=Mus musculus PE=2 SV=2	-1.633	0.023	831593	508935
HA15_MOUSE	H-2 class I histocompatibility antigen, D-37 alpha chain OS=Mus musculus GN=H2-T23 PE=1 SV=1	-1.638	0.0004265	1270219	920298
ZFP91_MOUSE	E3 ubiquitin-protein ligase ZFP91 OS=Mus musculus GN=Zfp91 PE=1 SV=3	-1.639	1.154e-15	3.51781e+06	2147327
MSH6_MOUSE	DNA mismatch repair protein Msh6 OS=Mus musculus GN=Msh6 PE=1 SV=2	-1.641	3.784e-06	2215289	1.47456e+06
RL8_MOUSE	60S ribosomal protein L8 OS=Mus musculus GN=Rpl8 PE=2 SV=2	-1.645	0	28384328	17326160
VDAC3_MOUSE	Voltage-dependent anion-selective channel protein 3 OS=Mus musculus GN=Vdac3 PE=1 SV=1	-1.647	9.984e-15	16384222	10469246
IF4E_MOUSE	Eukaryotic translation initiation factor 4E OS=Mus musculus GN=Eif4e PE=1 SV=1	-1.647	0.004	2275249	1.37295e+06
ADH7_MOUSE	Alcohol dehydrogenase class 4 mu/sigma chain OS=Mus musculus GN=Adh7 PE=2 SV=1	-1.651	0	18388328	11137160
PGFRA_MOUSE	Alpha-type platelet-derived growth factor receptor OS=Mus musculus GN=Pdgfra PE=1 SV=3	-1.651	2.313e-17	2982675	1805463
RL13A_MOUSE	60S ribosomal protein L13a OS=Mus musculus GN=Rpl13a PE=1 SV=4	-1.655	5.461e-13	21029050	12885227
DCAF7_MOUSE	DDB1- and CUL4-associated factor 7 OS=Mus musculus GN=Dcaf7 PE=2 SV=1	-1.659	0.028	1.57127e+06	943359
ENV1_MOUSE	MLV-related proviral Env polyprotein OS=Mus musculus PE=2 SV=3	-1.659	0	11901663	7.1309e+06
MOSC2_MOUSE	MOSC domain-containing protein 2, mitochondrial OS=Mus musculus GN=Mosc2 PE=1 SV=1	-1.662	1.794e-15	2.21349e+06	1327665
RL17_MOUSE	60S ribosomal protein L17 OS=Mus musculus GN=Rpl17 PE=2 SV=3	-1.662	5.605e-45	16767352	10086106
MTCH2_MOUSE	Mitochondrial carrier homolog 2 OS=Mus musculus GN=Mtch2 PE=1 SV=1	-1.663	5.471e-05	8255754	4624227
AT1A1_MOUSE	Sodium/potassium-transporting ATPase subunit alpha-1 OS=Mus musculus GN=Atp1a1 PE=1 SV=1	-1.663	8.749e-10	5.00123e+06	2.83639e+06
PHB_MOUSE	Prohibitin OS=Mus musculus GN=Phb PE=1 SV=1	-1.665	2.361e-17	4540577	2742795
WDR61_MOUSE	WD repeat-containing protein 61 OS=Mus musculus GN=Wdr61 PE=2 SV=1	-1.667	1.1e-06	761106	439910
RS16_MOUSE	40S ribosomal protein S16 OS=Mus musculus GN=Rps16 PE=2 SV=4	-1.67	6.112e-36	5245036	3.13452e+06
ECHA_MOUSE	Trifunctional enzyme subunit alpha, mitochondrial OS=Mus musculus GN=Hadha PE=1 SV=1	-1.673	1.122e-05	2.29968e+06	1.44687e+06
DDX1_MOUSE	ATP-dependent RNA helicase DDX1 OS=Mus musculus GN=Ddx1 PE=1 SV=1	-1.675	5.104e-07	894655	534231
RS27L_MOUSE	40S ribosomal protein S27-like OS=Mus musculus GN=Rps27l PE=2 SV=3	-1.678	1.659e-23	20885424	12436422
RAP1A_MOUSE	Ras-related protein Rap-1A OS=Mus musculus GN=Rap1a PE=2 SV=1	-1.68	0	11554928	6.89766e+06
PIGB_MOUSE	GPI mannosyltransferase 3 OS=Mus musculus GN=Pigb PE=1 SV=2	-1.68	0.007	3.88987e+06	2.3296e+06
ABCF2_MOUSE	ATP-binding cassette sub-family F member 2 OS=Mus musculus GN=Abcf2 PE=2 SV=1	-1.681	0.083	1.03585e+06	611256
CNBP_MOUSE	Isoform 2 of Cellular nucleic acid-binding protein OS=Mus musculus GN=Cnbp	-1.683	3.066e-42	5670338	3.29001e+06
CX4NB_MOUSE	Neighbor of COX4 OS=Mus musculus GN=Cox4nb PE=1 SV=1	-1.685	1.6e-06	2.75054e+06	1.59603e+06
COX3_MOUSE	Cytochrome c oxidase subunit 3 OS=Mus musculus GN=Mtco3 PE=3 SV=1	-1.687	2.381e-19	4931881	2.89955e+06
RS13_MOUSE	40S ribosomal protein S13 OS=Mus musculus GN=Rps13 PE=1 SV=2	-1.692	1.806e-13	7.23334e+06	4.19342e+06
PDIA3_MOUSE	Protein disulfide-isomerase A3 OS=Mus musculus GN=Pdia3 PE=1 SV=2	-1.694	8.55e-06	3.5085e+06	2.02686e+06
MBOA1_MOUSE	Lysophospholipid acyltransferase 1 OS=Mus musculus GN=Mboat1 PE=1 SV=1	-1.696	1.595e-06	1.9956e+06	1174845
RS24_MOUSE	Isoform 2 of 40S ribosomal protein S24 OS=Mus musculus GN=Rps24	-1.696	1.455e-06	1.97096e+06	1.16194e+06
HNRL1_MOUSE	Heterogeneous nuclear ribonucleoprotein U-like protein 1 OS=Mus musculus GN=Hnrnpul1 PE=1 SV=1	-1.699	5.451e-19	4.43587e+06	2.45711e+06
PABP1_MOUSE	Polyadenylate-binding protein 1 OS=Mus musculus GN=Pabpc1 PE=1 SV=1	-1.705	0.0003231	2500520	1.46411e+06
PREB_MOUSE	Prolactin regulatory element-binding protein OS=Mus musculus GN=Preb PE=1 SV=1	-1.708	2.339e-12	2.24558e+06	1.31532e+06
MPCP_MOUSE	Phosphate carrier protein, mitochondrial OS=Mus musculus GN=Slc25a3 PE=1 SV=1	-1.71	0	21631240	12853086
IDH3A_MOUSE	Isocitrate dehydrogenase [NAD] subunit alpha, mitochondrial OS=Mus musculus GN=Idh3a PE=1 SV=1	-1.712	8.764e-12	5.54709e+06	3049593
MDHM_MOUSE	Malate dehydrogenase, mitochondrial OS=Mus musculus GN=Mdh2 PE=1 SV=3	-1.713	0	23655396	13738395
FES_MOUSE	Tyrosine-protein kinase Fes/Fps OS=Mus musculus GN=Fes PE=1 SV=2	-1.714	0.082	420241	247731
S30BP_MOUSE	SAP30-binding protein OS=Mus musculus GN=Sap30bp PE=2 SV=2	-1.716	1.942e-42	9967024	5805201
ACADL_MOUSE	Long-chain specific acyl-CoA dehydrogenase, mitochondrial OS=Mus musculus GN=Acadl PE=2 SV=2	-1.718	0	12748261	7.36035e+06
FADS2_MOUSE	Fatty acid desaturase 2 OS=Mus musculus GN=Fads2 PE=2 SV=1	-1.721	2.531e-07	3189845	1.85998e+06
ABD12_MOUSE	Monoacylglycerol lipase ABHD12 OS=Mus musculus GN=Abhd12 PE=1 SV=2	-1.723	3.89e-08	2.35008e+06	1409437
CCD73_MOUSE	Coiled-coil domain-containing protein 73 OS=Mus musculus GN=Ccdc73 PE=1 SV=2	-1.729	1.944e-21	26692864	15440174
TBG2_MOUSE	Tubulin gamma-2 chain OS=Mus musculus GN=Tubg2 PE=2 SV=1	-1.729	0.0001868	2.42846e+06	1.40733e+06
TM9S1_MOUSE	Transmembrane 9 superfamily member 1 OS=Mus musculus GN=Tm9sf1 PE=2 SV=2	-1.73	6.522e-05	3.72903e+06	2.18954e+06
PDIA1_MOUSE	Protein disulfide-isomerase OS=Mus musculus GN=P4hb PE=1 SV=1	-1.731	0.011	1.55212e+06	891701
ZNT7_MOUSE	Zinc transporter 7 OS=Mus musculus GN=Slc30a7 PE=1 SV=1	-1.736	0	11222661	6632099
DHE3_MOUSE	Glutamate dehydrogenase 1, mitochondrial OS=Mus musculus GN=Glud1 PE=1 SV=1	-1.741	0.0001707	4.64533e+06	2.97835e+06
RL19_MOUSE	60S ribosomal protein L19 OS=Mus musculus GN=Rpl19 PE=1 SV=1	-1.745	0	18315690	10498238
OAT_MOUSE	Ornithine aminotransferase, mitochondrial OS=Mus musculus GN=Oat PE=1 SV=1	-1.747	4.358e-10	3.95985e+06	2306871
DIC_MOUSE	Mitochondrial dicarboxylate carrier OS=Mus musculus GN=Slc25a10 PE=2 SV=2	-1.748	8.287e-10	2.53196e+06	1.40594e+06
CLC2I_MOUSE	Isoform 2 of C-type lectin domain family 2 member I OS=Mus musculus GN=Clec2i	-1.749	0	6.00128e+06	3.34068e+06
GALT7_MOUSE	Isoform 2 of N-acetylgalactosaminyltransferase 7 OS=Mus musculus GN=Galnt7	-1.753	1.036e-16	5315519	3.02914e+06
SODM_MOUSE	Superoxide dismutase [Mn], mitochondrial OS=Mus musculus GN=Sod2 PE=1 SV=3	-1.753	0	4.7872e+06	2.70571e+06
SEC62_MOUSE	Translocation protein SEC62 OS=Mus musculus GN=Sec62 PE=1 SV=1	-1.758	1.355e-07	3369052	1.91735e+06
CPT1A_MOUSE	Carnitine O-palmitoyltransferase 1, liver isoform OS=Mus musculus GN=Cpt1a PE=2 SV=4	-1.759	0.009	247710	149491
SPAG5_MOUSE	Sperm-associated antigen 5 OS=Mus musculus GN=Spag5 PE=1 SV=1	-1.761	1.702e-15	6785029	3870118
GSE1_MOUSE	Isoform 2 of Genetic suppressor element 1 OS=Mus musculus GN=Gse1	-1.769	1.776e-23	6.71419e+06	3.78163e+06
SRP68_MOUSE	Signal recognition particle 68 kDa protein OS=Mus musculus GN=Srp68 PE=2 SV=1	-1.771	9.662e-33	1.21468e+06	685968
RBL1_MOUSE	Retinoblastoma-like protein 1 OS=Mus musculus GN=Rbl1 PE=1 SV=2	-1.771	0.004	1.11714e+06	514743
ODPA_MOUSE	Pyruvate dehydrogenase E1 component subunit alpha, somatic form, mitochondrial OS=Mus musculus GN=Pdha1 PE=1 SV=1	-1.778	1.877e-08	5534843	2.8896e+06
PLK1_MOUSE	Serine/threonine-protein kinase PLK1 OS=Mus musculus GN=Plk1 PE=1 SV=2	-1.778	0.0003296	1.71398e+06	1.01089e+06
RS20_MOUSE	40S ribosomal protein S20 OS=Mus musculus GN=Rps20 PE=1 SV=1	-1.78	1.339e-25	4681096	2.53834e+06
SC31A_MOUSE	Protein transport protein Sec31A OS=Mus musculus GN=Sec31a PE=1 SV=2	-1.78	3.522e-22	3.96492e+06	2.32799e+06
VDAC1_MOUSE	Voltage-dependent anion-selective channel protein 1 OS=Mus musculus GN=Vdac1 PE=1 SV=3	-1.782	3.175e-12	3.71752e+06	2.3853e+06
ALDH2_MOUSE	Aldehyde dehydrogenase, mitochondrial OS=Mus musculus GN=Aldh2 PE=1 SV=1	-1.784	1.204e-14	22716832	13969593
ABCD3_MOUSE	ATP-binding cassette sub-family D member 3 OS=Mus musculus GN=Abcd3 PE=1 SV=1	-1.786	4.104e-10	2.69941e+06	1.3679e+06
ADT1_MOUSE	ADP/ATP translocase 1 OS=Mus musculus GN=Slc25a4 PE=1 SV=4	-1.792	0	37571400	21259910
RL22_MOUSE	60S ribosomal protein L22 OS=Mus musculus GN=Rpl22 PE=2 SV=2	-1.793	2.333e-05	4836931	2.68626e+06
RL9_MOUSE	60S ribosomal protein L9 OS=Mus musculus GN=Rpl9 PE=2 SV=2	-1.793	0.006	4616693	2.76746e+06
SPT6H_MOUSE	Transcription elongation factor SPT6 OS=Mus musculus GN=Supt6h PE=1 SV=2	-1.794	9.748e-07	3.20002e+06	1.77977e+06
DLDH_MOUSE	Dihydrolipoyl dehydrogenase, mitochondrial OS=Mus musculus GN=Dld PE=1 SV=2	-1.798	7.576e-20	5218892	2.74159e+06
CD47_MOUSE	Leukocyte surface antigen CD47 OS=Mus musculus GN=Cd47 PE=1 SV=2	-1.801	1.867e-13	2.78855e+06	1.54447e+06
ODO2_MOUSE	Dihydrolipoyllysine-residue succinyltransferase component of 2-oxoglutarate dehydrogenase complex, mitochondrial OS=Mus musculus GN=Dlst PE=1 SV=1	-1.802	3.262e-41	3.97503e+06	2.1832e+06
IDHG1_MOUSE	Isocitrate dehydrogenase [NAD] subunit gamma 1, mitochondrial OS=Mus musculus GN=Idh3g PE=1 SV=1	-1.803	9.951e-25	8989996	5.29785e+06
TIAR_MOUSE	Nucleolysin TIAR OS=Mus musculus GN=Tial1 PE=2 SV=1	-1.806	0.014	107702	59638.6
CDC20_MOUSE	Cell division cycle protein 20 homolog OS=Mus musculus GN=Cdc20 PE=1 SV=2	-1.809	5.746e-08	1.94156e+06	1.23135e+06
NB5R3_MOUSE	NADH-cytochrome b5 reductase 3 OS=Mus musculus GN=Cyb5r3 PE=1 SV=3	-1.815	2.252e-33	6435357	3459220
SCFD1_MOUSE	Isoform 3 of Sec1 family domain-containing protein 1 OS=Mus musculus GN=Scfd1	-1.817	1.434e-21	2.05164e+06	1129129
TNPO1_MOUSE	Transportin-1 OS=Mus musculus GN=Tnpo1 PE=1 SV=2	-1.821	6.764e-21	1.94613e+06	1.04585e+06
M2OM_MOUSE	Mitochondrial 2-oxoglutarate/malate carrier protein OS=Mus musculus GN=Slc25a11 PE=1 SV=3	-1.823	7.061e-20	5032263	2.71504e+06
REEP5_MOUSE	Receptor expression-enhancing protein 5 OS=Mus musculus GN=Reep5 PE=1 SV=1	-1.824	8.463e-14	8639701	4729651
ECHB_MOUSE	Trifunctional enzyme subunit beta, mitochondrial OS=Mus musculus GN=Hadhb PE=1 SV=1	-1.824	0	4.82624e+06	2630444
DHSA_MOUSE	Succinate dehydrogenase [ubiquinone] flavoprotein subunit, mitochondrial OS=Mus musculus GN=Sdha PE=1 SV=1	-1.83	2.618e-19	11378880	6.20748e+06
CNOT1_MOUSE	Isoform 2 of CCR4-NOT transcription complex subunit 1 OS=Mus musculus GN=Cnot1	-1.832	7.386e-20	2.09492e+06	1.07793e+06
RL29_MOUSE	60S ribosomal protein L29 OS=Mus musculus GN=Rpl29 PE=2 SV=2	-1.834	0	27136808	14811529
ADT2_MOUSE	ADP/ATP translocase 2 OS=Mus musculus GN=Slc25a5 PE=1 SV=3	-1.841	0	9523737	5151100
ZW10_MOUSE	Centromere/kinetochore protein zw10 homolog OS=Mus musculus GN=Zw10 PE=2 SV=3	-1.842	1.25e-05	593899	322395
AT8B5_MOUSE	Probable phospholipid-transporting ATPase FetA OS=Mus musculus GN=Atp8b5 PE=2 SV=1	-1.842	2.035e-19	6719801	3645183
SPTB2_MOUSE	Spectrin beta chain, brain 1 OS=Mus musculus GN=Sptbn1 PE=1 SV=2	-1.845	0	26455750	14337644
CATC_MOUSE	Dipeptidyl peptidase 1 OS=Mus musculus GN=Ctsc PE=2 SV=1	-1.852	4.268e-18	8218672	4550975
RL36A_MOUSE	60S ribosomal protein L36a OS=Mus musculus GN=Rpl36a PE=3 SV=2	-1.853	8.011e-31	7596112	4.13747e+06
RLA0_MOUSE	60S acidic ribosomal protein P0 OS=Mus musculus GN=Rplp0 PE=1 SV=3	-1.854	1.01e-24	2982558	1.60852e+06
GRP75_MOUSE	Stress-70 protein, mitochondrial OS=Mus musculus GN=Hspa9 PE=1 SV=2	-1.865	5.964e-42	4543663	2.31685e+06
RS26_MOUSE	40S ribosomal protein S26 OS=Mus musculus GN=Rps26 PE=2 SV=3	-1.865	0	14634924	7756417
ODO1_MOUSE	Isoform 2 of 2-oxoglutarate dehydrogenase, mitochondrial OS=Mus musculus GN=Ogdh	-1.867	1.054e-28	7.11283e+06	3.98072e+06
CP51A_MOUSE	Lanosterol 14-alpha demethylase OS=Mus musculus GN=Cyp51a1 PE=2 SV=1	-1.869	1.014e-13	3.02841e+06	1629156
CISY_MOUSE	Citrate synthase, mitochondrial OS=Mus musculus GN=Cs PE=1 SV=1	-1.874	0	10815150	5934438
LTMD1_MOUSE	LETM1 domain-containing protein 1 OS=Mus musculus GN=Letmd1 PE=2 SV=1	-1.878	4.111e-37	4370975	2.44977e+06
PERE_MOUSE	Eosinophil peroxidase OS=Mus musculus GN=Epx PE=1 SV=1	-1.878	0	11700198	6400822
ISCA2_MOUSE	Iron-sulfur cluster assembly 2 homolog, mitochondrial OS=Mus musculus GN=Isca2 PE=2 SV=2	-1.881	4.183e-18	7144621	3794032
BGLR_MOUSE	Beta-glucuronidase OS=Mus musculus GN=Gusb PE=2 SV=1	-1.882	0.174	3.15374e+06	1.76223e+06
KTAP2_MOUSE	Keratinocyte-associated protein 2 OS=Mus musculus GN=Krtcap2 PE=2 SV=2	-1.882	9.79e-06	1.28858e+06	682811
RIR1_MOUSE	Ribonucleoside-diphosphate reductase large subunit OS=Mus musculus GN=Rrm1 PE=1 SV=1	-1.883	5.936e-13	2.35575e+06	1250469
ATPA_MOUSE	ATP synthase subunit alpha, mitochondrial OS=Mus musculus GN=Atp5a1 PE=1 SV=1	-1.884	8.902e-28	6953954	3.79958e+06
RL12_MOUSE	60S ribosomal protein L12 OS=Mus musculus GN=Rpl12 PE=1 SV=2	-1.885	6.223e-11	5763467	3.18099e+06
SPCS2_MOUSE	Signal peptidase complex subunit 2 OS=Mus musculus GN=Spcs2 PE=2 SV=1	-1.886	2.492e-18	3.55786e+06	1.84973e+06
GORS2_MOUSE	Golgi reassembly-stacking protein 2 OS=Mus musculus GN=Gorasp2 PE=1 SV=3	-1.886	1.531e-07	3.86501e+06	2.20586e+06
1433Z_MOUSE	14-3-3 protein zeta/delta - Mus musculus (Mouse)	-1.89	8.209e-25	2.09205e+06	1.10708e+06
AATM_MOUSE	Aspartate aminotransferase, mitochondrial OS=Mus musculus GN=Got2 PE=1 SV=1	-1.89	0	13422149	7.22163e+06
GBLP_MOUSE	Guanine nucleotide-binding protein subunit beta-2-like 1 OS=Mus musculus GN=Gnb2l1 PE=1 SV=3	-1.891	0	11991650	6379482
CHSTC_MOUSE	Carbohydrate sulfotransferase 12 OS=Mus musculus GN=Chst12 PE=2 SV=1	-1.894	6.078e-06	1.88988e+06	891715
PTH2_MOUSE	Peptidyl-tRNA hydrolase 2, mitochondrial OS=Mus musculus GN=Ptrh2 PE=2 SV=1	-1.896	2.909e-21	3158507	1.66626e+06
VAS1_MOUSE	V-type proton ATPase subunit S1 OS=Mus musculus GN=Atp6ap1 PE=1 SV=1	-1.898	4.929e-21	4788511	2.59791e+06
MCAF1_MOUSE	Activating transcription factor 7-interacting protein 1 OS=Mus musculus GN=Atf7ip PE=1 SV=1	-1.898	1.391e-24	3.69547e+06	1.94615e+06
RS25_MOUSE	40S ribosomal protein S25 OS=Mus musculus GN=Rps25 PE=2 SV=1	-1.9	1.162e-09	7.8991e+06	4.15808e+06
TOM70_MOUSE	Mitochondrial import receptor subunit TOM70 OS=Mus musculus GN=Tomm70a PE=1 SV=1	-1.906	2.212e-10	4245642	2.16483e+06
TNPO3_MOUSE	Transportin-3 OS=Mus musculus GN=Tnpo3 PE=1 SV=1	-1.907	1.696e-16	5.03354e+06	2.63917e+06
ACDSB_MOUSE	Short/branched chain specific acyl-CoA dehydrogenase, mitochondrial OS=Mus musculus GN=Acadsb PE=1 SV=1	-1.908	0.0006113	681866	356668
UBP2L_MOUSE	Ubiquitin-associated protein 2-like OS=Mus musculus GN=Ubap2l PE=1 SV=1	-1.915	1.132e-12	13078234	7.10251e+06
LPPRC_MOUSE	Leucine-rich PPR motif-containing protein, mitochondrial OS=Mus musculus GN=Lrpprc PE=1 SV=2	-1.917	5.697e-28	3349980	1747200
RLGPB_MOUSE	Ral GTPase-activating protein subunit beta OS=Mus musculus GN=Ralgapb PE=1 SV=2	-1.918	3.491e-08	870387	454566
RLA1_MOUSE	60S acidic ribosomal protein P1 OS=Mus musculus GN=Rplp1 PE=1 SV=1	-1.92	4.976e-18	3442907	1.79322e+06
RL28_MOUSE	60S ribosomal protein L28 OS=Mus musculus GN=Rpl28 PE=1 SV=2	-1.921	0	14186376	7.3876e+06
SPNS3_MOUSE	Protein spinster homolog 3 OS=Mus musculus GN=Spns3 PE=2 SV=1	-1.922	4.42e-13	1.29364e+06	673183
LCLT1_MOUSE	Lysocardiolipin acyltransferase 1 OS=Mus musculus GN=Lclat1 PE=2 SV=2	-1.926	2.554e-06	3.61746e+06	1877415
MCAR1_MOUSE	Mitochondrial carrier triple repeat protein 1 OS=Mus musculus GN=Mcart1 PE=2 SV=1	-1.928	6.827e-05	477859	233972
LEG1_MOUSE	Galectin-1 OS=Mus musculus GN=Lgals1 PE=1 SV=3	-1.938	1.057e-22	7296298	3.76193e+06
MA1A2_MOUSE	Mannosyl-oligosaccharide 1,2-alpha-mannosidase IB OS=Mus musculus GN=Man1a2 PE=2 SV=1	-1.941	2.125e-14	4.3703e+06	2.58453e+06
CY1_MOUSE	Cytochrome c1, heme protein, mitochondrial OS=Mus musculus GN=Cyc1 PE=1 SV=1	-1.943	4.715e-16	8676665	4497829
RL10_MOUSE	60S ribosomal protein L10 OS=Mus musculus GN=Rpl10 PE=2 SV=3	-1.944	0	18812340	9673458
DEGS1_MOUSE	Sphingolipid delta(4)-desaturase DES1 OS=Mus musculus GN=Degs1 PE=2 SV=1	-1.947	0.001	2.61958e+06	1.3418e+06
PDLI5_MOUSE	PDZ and LIM domain protein 5 OS=Mus musculus GN=Pdlim5 PE=1 SV=3	-1.958	1.481e-20	7.60845e+06	3902571
VPP2_MOUSE	V-type proton ATPase 116 kDa subunit a isoform 2 OS=Mus musculus GN=Atp6v0a2 PE=1 SV=2	-1.958	1.933e-13	1.87328e+06	956179
NMT1_MOUSE	Glycylpeptide N-tetradecanoyltransferase 1 OS=Mus musculus GN=Nmt1 PE=1 SV=1	-1.96	4.221e-08	2.28694e+06	1.16504e+06
SENP3_MOUSE	Sentrin-specific protease 3 OS=Mus musculus GN=Senp3 PE=1 SV=1	-1.965	0.0001385	204778	104198
SRF_MOUSE	Serum response factor OS=Mus musculus GN=Srf PE=1 SV=1	-1.969	3.245e-20	1.59732e+06	811650
ALDOA_MOUSE	Fructose-bisphosphate aldolase A OS=Mus musculus GN=Aldoa PE=1 SV=2	-1.979	1.581e-16	15921170	8.07407e+06
PRDX3_MOUSE	Thioredoxin-dependent peroxide reductase, mitochondrial OS=Mus musculus GN=Prdx3 PE=1 SV=1	-1.981	2.826e-32	3.917e+06	1.96114e+06
UBAP2_MOUSE	Ubiquitin-associated protein 2 OS=Mus musculus GN=Ubap2 PE=2 SV=1	-1.99	4.433e-33	12240108	6194742
QCR1_MOUSE	Cytochrome b-c1 complex subunit 1, mitochondrial OS=Mus musculus GN=Uqcrc1 PE=1 SV=1	-1.993	3.509e-28	5077358	2.54476e+06
SFXN1_MOUSE	Sideroflexin-1 OS=Mus musculus GN=Sfxn1 PE=1 SV=3	-1.998	1.485e-12	761722	381151
1433T_MOUSE	14-3-3 protein theta OS=Mus musculus GN=Ywhaq PE=1 SV=1	-2	7.815e-40	12453002	6229520
P5CS_MOUSE	Delta-1-pyrroline-5-carboxylate synthase OS=Mus musculus GN=Aldh18a1 PE=2 SV=1	-2	1.613e-20	4.42292e+06	2219410
SYMC_MOUSE	Methionyl-tRNA synthetase, cytoplasmic OS=Mus musculus GN=Mars PE=2 SV=1	-2.017	1.008e-08	2.24781e+06	1.11333e+06
FAAH1_MOUSE	Fatty-acid amide hydrolase 1 OS=Mus musculus GN=Faah PE=2 SV=1	-2.02	0.002	506369	250086
ACON_MOUSE	Aconitate hydratase, mitochondrial OS=Mus musculus GN=Aco2 PE=1 SV=1	-2.021	8.974e-29	5.60745e+06	2.69949e+06
RAC2_MOUSE	Ras-related C3 botulinum toxin substrate 2 OS=Mus musculus GN=Rac2 PE=2 SV=1	-2.024	1.047e-18	4.26679e+06	2026768
COX5B_MOUSE	Cytochrome c oxidase subunit 5B, mitochondrial OS=Mus musculus GN=Cox5b PE=1 SV=1	-2.027	0	8410848	4152883
DOCK8_MOUSE	Dedicator of cytokinesis protein 8 OS=Mus musculus GN=Dock8 PE=2 SV=4	-2.035	1.054e-08	1.76093e+06	866312
PRC2C_MOUSE	Isoform 2 of Protein PRRC2C OS=Mus musculus GN=Prrc2c	-2.036	3.305e-30	7339098	3.75966e+06
IPO5_MOUSE	Importin-5 OS=Mus musculus GN=Ipo5 PE=1 SV=3	-2.042	3.442e-17	4.82456e+06	2.36097e+06
PPIA_MOUSE	Peptidyl-prolyl cis-trans isomerase A OS=Mus musculus GN=Ppia PE=1 SV=2	-2.043	0	11027384	5.43984e+06
ZDH13_MOUSE	Palmitoyltransferase ZDHHC13 OS=Mus musculus GN=Zdhhc13 PE=1 SV=2	-2.05	4.278e-09	1.98827e+06	1.09189e+06
B4GN1_MOUSE	Beta-1,4 N-acetylgalactosaminyltransferase 1 OS=Mus musculus GN=B4galnt1 PE=2 SV=1	-2.057	1.687e-07	1435349	667695
PTSS1_MOUSE	Phosphatidylserine synthase 1 OS=Mus musculus GN=Ptdss1 PE=2 SV=1	-2.059	1.262e-20	1.31094e+06	636582
EF2_MOUSE	Elongation factor 2 OS=Mus musculus GN=Eef2 PE=1 SV=2	-2.062	2.458e-14	8574985	3.91838e+06
HXK1_MOUSE	Isoform HK1 of Hexokinase-1 OS=Mus musculus GN=Hk1	-2.064	8.196e-12	824659	399513
TBB5_MOUSE	Tubulin beta-5 chain OS=Mus musculus GN=Tubb5 PE=1 SV=1	-2.083	4.746e-23	6558428	3.14742e+06
C1TM_MOUSE	Monofunctional C1-tetrahydrofolate synthase, mitochondrial OS=Mus musculus GN=Mthfd1l PE=1 SV=2	-2.084	2.055e-12	3.26114e+06	1.75508e+06
IDHP_MOUSE	Isocitrate dehydrogenase [NADP], mitochondrial OS=Mus musculus GN=Idh2 PE=1 SV=3	-2.109	2.084e-12	3556096	1.742e+06
MINK1_MOUSE	Isoform 2 of Traf2 and NCK-interacting protein kinase OS=Mus musculus GN=Tnik	-2.125	2.994e-20	3.33684e+06	1568476
PX11B_MOUSE	Peroxisomal membrane protein 11B OS=Mus musculus GN=Pex11b PE=2 SV=1	-2.131	2.355e-08	4.13991e+06	1933671
UBP2L_MOUSE	Isoform 2 of Ubiquitin-associated protein 2-like OS=Mus musculus GN=Ubap2l	-2.134	0	3.73343e+06	1.74933e+06
ERG7_MOUSE	Lanosterol synthase OS=Mus musculus GN=Lss PE=2 SV=2	-2.135	4.621e-23	4388606	2.13521e+06
CMC2_MOUSE	Calcium-binding mitochondrial carrier protein Aralar2 OS=Mus musculus GN=Slc25a13 PE=1 SV=1	-2.144	5.472e-07	1.35876e+06	632889
ODP2_MOUSE	Dihydrolipoyllysine-residue acetyltransferase component of pyruvate dehydrogenase complex, mitochondrial OS=Mus musculus GN=Dlat PE=1 SV=2	-2.154	0.0006181	1.38297e+06	607410
SYDC_MOUSE	Aspartyl-tRNA synthetase, cytoplasmic OS=Mus musculus GN=Dars PE=2 SV=1	-2.169	1.292e-12	4.176e+06	2.18631e+06
EIF3L_MOUSE	Eukaryotic translation initiation factor 3 subunit L OS=Mus musculus GN=Eif3l PE=1 SV=1	-2.179	1.209e-05	1.51609e+06	695015
SYIM_MOUSE	Isoleucyl-tRNA synthetase, mitochondrial OS=Mus musculus GN=Iars2 PE=2 SV=1	-2.179	5.143e-14	766911	340977
MAVS_MOUSE	Mitochondrial antiviral-signaling protein OS=Mus musculus GN=Mavs PE=1 SV=1	-2.187	0	6.51354e+06	3.05021e+06
CAND1_MOUSE	Cullin-associated NEDD8-dissociated protein 1 OS=Mus musculus GN=Cand1 PE=2 SV=2	-2.197	4.172e-08	3.39955e+06	1.40342e+06
NALP5_MOUSE	Isoform 6 of NACHT, LRR and PYD domains-containing protein 5 OS=Mus musculus GN=Nlrp5	-2.197	0	8.19055e+06	3729727
CPT2_MOUSE	Carnitine O-palmitoyltransferase 2, mitochondrial OS=Mus musculus GN=Cpt2 PE=1 SV=1	-2.2	9.58e-10	923522	397794
EFGM_MOUSE	Elongation factor G, mitochondrial OS=Mus musculus GN=Gfm1 PE=2 SV=1	-2.202	2.094e-13	1.31861e+06	597851
STIP1_MOUSE	Stress-induced-phosphoprotein 1 OS=Mus musculus GN=Stip1 PE=1 SV=1	-2.207	1.554e-09	3.64864e+06	1.64857e+06
ACSL4_MOUSE	Long-chain-fatty-acid--CoA ligase 4 OS=Mus musculus GN=Acsl4 PE=2 SV=1	-2.208	2.786e-05	1.72978e+06	779922
ACTG_MOUSE	Actin, cytoplasmic 1 OS=Mus musculus GN=Actb PE=1 SV=1	-2.209	0	52237272	24210860
TCPH_MOUSE	T-complex protein 1 subunit eta OS=Mus musculus GN=Cct7 PE=1 SV=1	-2.211	1.974e-13	707605	336125
COPG_MOUSE	Coatomer subunit gamma OS=Mus musculus GN=Copg PE=2 SV=1	-2.227	4.036e-19	1.61281e+06	734224
CNOT2_MOUSE	Isoform 2 of CCR4-NOT transcription complex subunit 2 OS=Mus musculus GN=Cnot2	-2.231	1.489e-29	6603000	2.95896e+06
RS2_MOUSE	40S ribosomal protein S2 OS=Mus musculus GN=Rps2 PE=1 SV=3	-2.253	2.587e-14	8729173	4.05102e+06
BGAL_MOUSE	Beta-galactosidase OS=Mus musculus GN=Glb1 PE=2 SV=1	-2.253	6.268e-12	1.22946e+06	545549
NDUAA_MOUSE	NADH dehydrogenase [ubiquinone] 1 alpha subcomplex subunit 10, mitochondrial OS=Mus musculus GN=Ndufa10 PE=1 SV=1	-2.267	0.007	924936	403564
TM168_MOUSE	Transmembrane protein 168 OS=Mus musculus GN=Tmem168 PE=2 SV=1	-2.269	0.002	721965	318160
GBB2_MOUSE	Guanine nucleotide-binding protein G(I)/G(S)/G(T) subunit beta-2 OS=Mus musculus GN=Gnb2 PE=1 SV=3	-2.277	1.831e-27	8038833	3.53001e+06
AIFM1_MOUSE	Apoptosis-inducing factor 1, mitochondrial OS=Mus musculus GN=Aifm1 PE=1 SV=1	-2.279	7.835e-20	2207486	1.01768e+06
CATD_MOUSE	Cathepsin D OS=Mus musculus GN=Ctsd PE=1 SV=1	-2.285	9.995e-21	5980361	2.77052e+06
CYTF_MOUSE	Cystatin-F OS=Mus musculus GN=Cst7 PE=2 SV=1	-2.291	2.939e-30	5.90471e+06	2723530
KPYM_MOUSE	Pyruvate kinase isozymes M1/M2 OS=Mus musculus GN=Pkm2 PE=1 SV=4	-2.299	0	6.82936e+06	2.94979e+06
B4GT7_MOUSE	Beta-1,4-galactosyltransferase 7 OS=Mus musculus GN=B4galt7 PE=2 SV=1	-2.302	9.884e-09	2.08568e+06	899000
THIO_MOUSE	Thioredoxin OS=Mus musculus GN=Txn PE=1 SV=3	-2.311	2.997e-10	8649804	3.76025e+06
ETFA_MOUSE	Electron transfer flavoprotein subunit alpha, mitochondrial OS=Mus musculus GN=Etfa PE=1 SV=2	-2.313	7.224e-14	2384071	1035545
MYH9_MOUSE	Myosin-9 OS=Mus musculus GN=Myh9 PE=1 SV=3	-2.317	3.227e-37	5008007	2158852
COX15_MOUSE	Cytochrome c oxidase assembly protein COX15 homolog OS=Mus musculus GN=Cox15 PE=2 SV=1	-2.319	4.232e-10	5.90293e+06	2.58013e+06
CH60_MOUSE	60 kDa heat shock protein, mitochondrial OS=Mus musculus GN=Hspd1 PE=1 SV=1	-2.326	3.013e-36	3.30642e+06	1.42223e+06
COR1A_MOUSE	Coronin-1A OS=Mus musculus GN=Coro1a PE=1 SV=5	-2.33	2.522e-31	8531976	3658731
TBA4A_MOUSE	Tubulin alpha-4A chain OS=Mus musculus GN=Tuba4a PE=1 SV=1	-2.356	1.249e-32	8798601	3749890
CREG1_MOUSE	Protein CREG1 OS=Mus musculus GN=Creg1 PE=2 SV=1	-2.38	0	2.52506e+06	1.06649e+06
TBA1C_MOUSE	Tubulin alpha-1C chain OS=Mus musculus GN=Tuba1c PE=1 SV=1	-2.38	0	15771074	6344485
HS90A_MOUSE	Heat shock protein HSP 90-alpha OS=Mus musculus GN=Hsp90aa1 PE=1 SV=4	-2.383	7.344e-23	5364989	2.24324e+06
GRPE1_MOUSE	GrpE protein homolog 1, mitochondrial OS=Mus musculus GN=Grpel1 PE=1 SV=1	-2.392	1.762e-08	999093	417458
SYEP_MOUSE	Bifunctional aminoacyl-tRNA synthetase OS=Mus musculus GN=Eprs PE=2 SV=3	-2.392	1.484e-17	938830	392542
PERM_MOUSE	Myeloperoxidase OS=Mus musculus GN=Mpo PE=2 SV=1	-2.397	7.346e-09	4627125	1923222
IF4A2_MOUSE	Isoform 2 of Eukaryotic initiation factor 4A-II OS=Mus musculus GN=Eif4a2	-2.407	0	4536140	1884759
CATZ_MOUSE	Cathepsin Z OS=Mus musculus GN=Ctsz PE=2 SV=1	-2.411	8.92e-26	5912601	2450253
SYRC_MOUSE	Arginyl-tRNA synthetase, cytoplasmic OS=Mus musculus GN=Rars PE=2 SV=2	-2.426	4.471e-27	2.20263e+06	907371
CALR_MOUSE	Calreticulin OS=Mus musculus GN=Calr PE=1 SV=1	-2.459	1.021e-09	2.97858e+06	1.3377e+06
BEND3_MOUSE	BEN domain-containing protein 3 OS=Mus musculus GN=Bend3 PE=2 SV=1	-2.463	6.872e-05	288824	117128
ACOT2_MOUSE	Acyl-coenzyme A thioesterase 2, mitochondrial OS=Mus musculus GN=Acot2 PE=1 SV=1	-2.486	5.01e-12	517681	208240
TALDO_MOUSE	Transaldolase OS=Mus musculus GN=Taldo1 PE=1 SV=2	-2.494	4.884e-06	3518477	1.84983e+06
GGH_MOUSE	Gamma-glutamyl hydrolase OS=Mus musculus GN=Ggh PE=1 SV=1	-2.514	6.179e-06	879228	348463
ACOT8_MOUSE	Acyl-coenzyme A thioesterase 8 OS=Mus musculus GN=Acot8 PE=1 SV=1	-2.538	5.973e-10	3.93975e+06	1.54984e+06
AP2M1_MOUSE	AP-2 complex subunit mu OS=Mus musculus GN=Ap2m1 PE=1 SV=1	-2.561	0	3.00891e+06	1.17534e+06
TCPG_MOUSE	T-complex protein 1 subunit gamma OS=Mus musculus GN=Cct3 PE=1 SV=1	-2.562	1.028e-40	7661512	2.98803e+06
ERGI3_MOUSE	Endoplasmic reticulum-Golgi intermediate compartment protein 3 OS=Mus musculus GN=Ergic3 PE=2 SV=1	-2.6	3.562e-25	2.38648e+06	917944
FRIL1_MOUSE	Ferritin light chain 1 OS=Mus musculus GN=Ftl1 PE=1 SV=2	-2.614	0	9252107	3.541e+06
MPPB_MOUSE	Mitochondrial-processing peptidase subunit beta OS=Mus musculus GN=Pmpcb PE=2 SV=1	-2.635	8.768e-34	4455500	1689866
AL9A1_MOUSE	4-trimethylaminobutyraldehyde dehydrogenase OS=Mus musculus GN=Aldh9a1 PE=1 SV=1	-2.654	0	3614161	1360725
PRRC1_MOUSE	Protein PRRC1 OS=Mus musculus GN=Prrc1 PE=2 SV=1	-2.734	0	11003073	3.88319e+06
CLH_MOUSE	Clathrin heavy chain 1 OS=Mus musculus GN=Cltc PE=1 SV=3	-2.738	2.648e-18	3716193	1.34814e+06
GANAB_MOUSE	Isoform 2 of Neutral alpha-glucosidase AB OS=Mus musculus GN=Ganab	-2.745	3.053e-35	9771147	3.57713e+06
ASAH1_MOUSE	Acid ceramidase OS=Mus musculus GN=Asah1 PE=1 SV=1	-2.75	5.805e-10	2921871	1048317
CARM1_MOUSE	Histone-arginine methyltransferase CARM1 OS=Mus musculus GN=Carm1 PE=1 SV=2	-2.752	0	6855724	2.49032e+06
FRIH_MOUSE	Ferritin heavy chain OS=Mus musculus GN=Fth1 PE=1 SV=2	-2.787	0	7740230	2776792
TPIS_MOUSE	Triosephosphate isomerase OS=Mus musculus GN=Tpi1 PE=1 SV=3	-2.812	8.744e-24	7.5737e+06	2701946
G3P_MOUSE	Glyceraldehyde-3-phosphate dehydrogenase OS=Mus musculus GN=Gapdh PE=1 SV=2	-2.831	1.009e-43	12836817	4.26937e+06
NDKA_MOUSE	Nucleoside diphosphate kinase A OS=Mus musculus GN=Nme1 PE=1 SV=1	-2.839	2.55e-43	4.41761e+06	1.56486e+06
COF1_MOUSE	Cofilin-1 OS=Mus musculus GN=Cfl1 PE=1 SV=3	-2.855	2.023e-06	3.8921e+06	1.24366e+06
IDE_MOUSE	Insulin-degrading enzyme OS=Mus musculus GN=Ide PE=2 SV=1	-2.863	2.009e-12	1.74002e+06	605958
HMGCL_MOUSE	Hydroxymethylglutaryl-CoA lyase, mitochondrial OS=Mus musculus GN=Hmgcl PE=1 SV=1	-2.871	4.287e-06	395754	137458
CP20A_MOUSE	Cytochrome P450 20A1 OS=Mus musculus GN=Cyp20a1 PE=2 SV=1	-2.873	1.705e-18	3.63288e+06	1.26463e+06
AP2B1_MOUSE	AP-2 complex subunit beta OS=Mus musculus GN=Ap2b1 PE=1 SV=1	-2.877	3.219e-31	2.7818e+06	969244
MINP1_MOUSE	Multiple inositol polyphosphate phosphatase 1 OS=Mus musculus GN=Minpp1 PE=1 SV=2	-2.89	3.997e-06	894048	307735
LDHA_MOUSE	L-lactate dehydrogenase A chain OS=Mus musculus GN=Ldha PE=1 SV=3	-2.901	0	11031775	3.88206e+06
QSOX1_MOUSE	Isoform 2 of Sulfhydryl oxidase 1 OS=Mus musculus GN=Qsox1	-2.905	9.603e-08	6428082	2898625
ENOA_MOUSE	Alpha-enolase OS=Mus musculus GN=Eno1 PE=1 SV=3	-2.938	1.223e-12	5357643	1.59083e+06
PPGB_MOUSE	Lysosomal protective protein OS=Mus musculus GN=Ctsa PE=1 SV=1	-3.014	1.213e-05	2486071	815453
PROF1_MOUSE	Profilin-1 OS=Mus musculus GN=Pfn1 PE=1 SV=2	-3.103	5.695e-36	12090274	3.73312e+06
PSA1_MOUSE	Proteasome subunit alpha type-1 OS=Mus musculus GN=Psma1 PE=1 SV=1	-3.117	3.306e-29	6.39089e+06	2.0363e+06
TCPZ_MOUSE	T-complex protein 1 subunit zeta OS=Mus musculus GN=Cct6a PE=1 SV=3	-3.202	2.729e-08	208526	65118.4
PSA4_MOUSE	Proteasome subunit alpha type-4 OS=Mus musculus GN=Psma4 PE=1 SV=1	-3.216	4.374e-10	3.58894e+06	1.11529e+06
TKT_MOUSE	Transketolase OS=Mus musculus GN=Tkt PE=1 SV=1	-3.233	0	6668537	2.05808e+06
CALX_MOUSE	Calnexin OS=Mus musculus GN=Canx PE=1 SV=1	-3.238	1.825e-35	5458033	1.68402e+06
AP2A1_MOUSE	Isoform B of AP-2 complex subunit alpha-1 OS=Mus musculus GN=Ap2a1	-3.245	1.64e-26	1.94902e+06	600857
SRPK1_MOUSE	Serine/threonine-protein kinase SRPK1 OS=Mus musculus GN=Srpk1 PE=1 SV=2	-3.267	1.567e-19	818198	250355
WDR1_MOUSE	WD repeat-containing protein 1 OS=Mus musculus GN=Wdr1 PE=1 SV=3	-3.287	0	3.71495e+06	1.13007e+06
DPOD1_MOUSE	DNA polymerase delta catalytic subunit OS=Mus musculus GN=Pold1 PE=1 SV=1	-3.342	6.074e-31	2.17572e+06	486018
PLSL_MOUSE	Plastin-2 OS=Mus musculus GN=Lcp1 PE=1 SV=4	-3.412	1.615e-25	2190172	584457
TCPD_MOUSE	T-complex protein 1 subunit delta OS=Mus musculus GN=Cct4 PE=1 SV=3	-3.421	4.345e-10	1.34211e+06	333217
MPPA_MOUSE	Mitochondrial-processing peptidase subunit alpha OS=Mus musculus GN=Pmpca PE=1 SV=1	-3.438	7.98e-05	550057	157995
SERA_MOUSE	D-3-phosphoglycerate dehydrogenase OS=Mus musculus GN=Phgdh PE=1 SV=3	-3.439	5.916e-17	1.19828e+06	347250
TCPB_MOUSE	T-complex protein 1 subunit beta OS=Mus musculus GN=Cct2 PE=1 SV=4	-3.484	0.0005168	628398	176303
SAHH_MOUSE	Adenosylhomocysteinase OS=Mus musculus GN=Ahcy PE=1 SV=3	-3.566	0	3.56598e+06	1000049
VPS35_MOUSE	Vacuolar protein sorting-associated protein 35 OS=Mus musculus GN=Vps35 PE=1 SV=1	-3.582	0	3060632	854421
RNT2_MOUSE	Ribonuclease T2 OS=Mus musculus GN=Rnaset2 PE=2 SV=1	-3.62	2.311e-07	5558692	1622121
FPPS_MOUSE	Farnesyl pyrophosphate synthase OS=Mus musculus GN=Fdps PE=2 SV=1	-3.687	2.736e-08	1.22889e+06	330783
YTHD3_MOUSE	Isoform 2 of YTH domain family protein 3 OS=Mus musculus GN=Ythdf3	-3.726	2.138e-13	5609771	1.48951e+06
RT17_MOUSE	28S ribosomal protein S17, mitochondrial OS=Mus musculus GN=Mrps17 PE=2 SV=1	-3.815	0.0005578	1.68329e+06	422023
RT07_MOUSE	28S ribosomal protein S7, mitochondrial OS=Mus musculus GN=Mrps7 PE=2 SV=1	-3.826	6.679e-05	1.38576e+06	362334
NEDD4_MOUSE	E3 ubiquitin-protein ligase NEDD4 OS=Mus musculus GN=Nedd4 PE=1 SV=3	-3.838	2.113e-16	1.91139e+06	496420
UBA1_MOUSE	Ubiquitin-like modifier-activating enzyme 1 OS=Mus musculus GN=Uba1 PE=1 SV=1	-4.076	0	2.44864e+06	576806
PPT1_MOUSE	Palmitoyl-protein thioesterase 1 OS=Mus musculus GN=Ppt1 PE=2 SV=2	-4.231	2.546e-11	2.87964e+06	675111
PGK1_MOUSE	Phosphoglycerate kinase 1 OS=Mus musculus GN=Pgk1 PE=1 SV=4	-4.272	1.357e-29	3.14683e+06	738272
TPP2_MOUSE	Tripeptidyl-peptidase 2 OS=Mus musculus GN=Tpp2 PE=2 SV=3	-4.485	5.026e-39	1.65224e+06	368011
IMPA1_MOUSE	Inositol monophosphatase 1 OS=Mus musculus GN=Impa1 PE=1 SV=1	-5.268	0	2406715	457780
IMDH2_MOUSE	Inosine-5'-monophosphate dehydrogenase 2 OS=Mus musculus GN=Impdh2 PE=1 SV=2	-5.383	2.738e-27	2352203	436363
FAS_MOUSE	Fatty acid synthase OS=Mus musculus GN=Fasn PE=1 SV=2	-5.883	9.073e-27	2461354	606749
K1C10_MOUSE	Isoform 2 of Keratin, type I cytoskeletal 10 OS=Mus musculus GN=Krt10	-25.704	0	147319520	5732025

## Sheet: 15173 Cytoplasm
Primary Protein Name	Protein Description	Fold Change	P-value	Intensity1	Intensity2
IBP4_MOUSE	Insulin-like growth factor-binding protein 4 OS=Mus musculus GN=Igfbp4 PE=2 SV=2	5.674	3.014e-13	630744	3.6236e+06
SRSF1_MOUSE	Isoform 2 of Serine/arginine-rich splicing factor 1 OS=Mus musculus GN=Srsf1	5.359	0	1.36233e+06	7315869
ENTP5_MOUSE	Ectonucleoside triphosphate diphosphohydrolase 5 OS=Mus musculus GN=Entpd5 PE=1 SV=1	4.707	0	864535	4.05201e+06
KDEL1_MOUSE	KDEL motif-containing protein 1 OS=Mus musculus GN=Kdelc1 PE=1 SV=1	4.695	1.644e-10	183782	868020
CTBL1_MOUSE	Beta-catenin-like protein 1 OS=Mus musculus GN=Ctnnbl1 PE=1 SV=1	4.372	3.952e-08	147346	642995
ENPL_MOUSE	Endoplasmin OS=Mus musculus GN=Hsp90b1 PE=1 SV=2	4.226	0	1.79505e+06	7515282
HYOU1_MOUSE	Hypoxia up-regulated protein 1 OS=Mus musculus GN=Hyou1 PE=1 SV=1	4.016	0	886319	3.69248e+06
HSP13_MOUSE	Heat shock 70 kDa protein 13 OS=Mus musculus GN=Hspa13 PE=2 SV=1	3.77	0	1.20221e+06	4711107
ERAP1_MOUSE	Endoplasmic reticulum aminopeptidase 1 OS=Mus musculus GN=Erap1 PE=2 SV=1	3.597	5.829e-24	592578	2211418
PAP21_MOUSE	Protease-associated domain-containing protein of 21 kDa OS=Mus musculus GN=Pap21 PE=2 SV=1	3.522	6.344e-15	536678	1896231
PGH1_MOUSE	Prostaglandin G/H synthase 1 OS=Mus musculus GN=Ptgs1 PE=2 SV=1	3.465	3.681e-13	247922	854743
TWSG1_MOUSE	Twisted gastrulation protein homolog 1 OS=Mus musculus GN=Twsg1 PE=1 SV=1	3.375	0	5.17386e+06	18669628
ERO1B_MOUSE	ERO1-like protein beta OS=Mus musculus GN=Ero1lb PE=2 SV=1	3.292	0	361102	1215132
SIL1_MOUSE	Nucleotide exchange factor SIL1 OS=Mus musculus GN=Sil1 PE=1 SV=2	2.98	3.278e-13	201193	599544
OFUT1_MOUSE	GDP-fucose protein O-fucosyltransferase 1 OS=Mus musculus GN=Pofut1 PE=2 SV=1	2.971	0	1.12316e+06	3.15808e+06
PP2BA_MOUSE	Serine/threonine-protein phosphatase 2B catalytic subunit alpha isoform OS=Mus musculus GN=Ppp3ca PE=1 SV=1	2.887	0.102	3.51907e+06	12822225
TGFB1_MOUSE	Transforming growth factor beta-1 OS=Mus musculus GN=Tgfb1 PE=2 SV=1	2.765	2.048e-06	148220	406952
OFUT2_MOUSE	GDP-fucose protein O-fucosyltransferase 2 OS=Mus musculus GN=Pofut2 PE=2 SV=1	2.431	1.121e-44	2115177	4885715
CYTC_MOUSE	Cystatin-C OS=Mus musculus GN=Cst3 PE=2 SV=2	2.18	4.492e-13	1.79895e+06	3.92681e+06
TXND5_MOUSE	Thioredoxin domain-containing protein 5 OS=Mus musculus GN=Txndc5 PE=1 SV=2	2.172	0	2.08355e+06	4.48359e+06
BTD_MOUSE	Biotinidase OS=Mus musculus GN=Btd PE=1 SV=2	2.049	1.37e-25	1262184	2.61188e+06
NUCB1_MOUSE	Nucleobindin-1 OS=Mus musculus GN=Nucb1 PE=1 SV=2	2.04	0.000924	429408	814728
AMRP_MOUSE	Alpha-2-macroglobulin receptor-associated protein OS=Mus musculus GN=Lrpap1 PE=1 SV=1	2.039	1.401e-44	1.47982e+06	2965562
EIF3B_MOUSE	Eukaryotic translation initiation factor 3 subunit B OS=Mus musculus GN=Eif3b PE=1 SV=1	2.037	2.224e-05	615703	1.25798e+06
PGTB1_MOUSE	Geranylgeranyl transferase type-1 subunit beta OS=Mus musculus GN=Pggt1b PE=2 SV=1	2.008	2.428e-13	2.02669e+06	4084796
GPR56_MOUSE	G-protein coupled receptor 56 OS=Mus musculus GN=Gpr56 PE=2 SV=1	1.97	1.559e-06	839578	1.65885e+06
AIP_MOUSE	AH receptor-interacting protein OS=Mus musculus GN=Aip PE=1 SV=1	1.929	9.865e-09	1.56796e+06	3.02817e+06
UBP15_MOUSE	Ubiquitin carboxyl-terminal hydrolase 15 OS=Mus musculus GN=Usp15 PE=2 SV=1	1.829	0.009	528604	971438
GT251_MOUSE	Procollagen galactosyltransferase 1 OS=Mus musculus GN=Glt25d1 PE=1 SV=2	1.759	4.118e-26	595751	1.05911e+06
CALU_MOUSE	Calumenin OS=Mus musculus GN=Calu PE=1 SV=1	1.702	2.322e-10	2698378	4.70527e+06
SAP_MOUSE	Sulfated glycoprotein 1 OS=Mus musculus GN=Psap PE=1 SV=2	1.59	0.075	4746226	7.70517e+06
PERE_MOUSE	Eosinophil peroxidase OS=Mus musculus GN=Epx PE=1 SV=1	1.551	0.002	327301	507770
UCHL3_MOUSE	Ubiquitin carboxyl-terminal hydrolase isozyme L3 OS=Mus musculus GN=Uchl3 PE=1 SV=2	1.546	0.043	2.49781e+06	3.76997e+06
GLU2B_MOUSE	Glucosidase 2 subunit beta OS=Mus musculus GN=Prkcsh PE=1 SV=1	1.54	0.016	535071	827146
NLE1_MOUSE	Notchless protein homolog 1 OS=Mus musculus GN=Nle1 PE=2 SV=3	1.507	0.012	467762	706381
HDGF_MOUSE	Hepatoma-derived growth factor OS=Mus musculus GN=Hdgf PE=1 SV=2	1.493	9.117e-06	2.41935e+06	3.60035e+06
U119B_MOUSE	Protein unc-119 homolog A OS=Mus musculus GN=Unc119 PE=1 SV=1	1.493	1.45e-07	1.08974e+06	1.62672e+06
GLCM_MOUSE	Glucosylceramidase OS=Mus musculus GN=Gba PE=1 SV=1	1.455	0.0008424	909089	1.32367e+06
FEN1_MOUSE	Flap endonuclease 1 OS=Mus musculus GN=Fen1 PE=1 SV=1	1.441	0.0002807	563708	812418
FA96A_MOUSE	MIP18 family protein FAM96A OS=Mus musculus GN=Fam96a PE=2 SV=1	1.429	0.018	423006	603273
LASP1_MOUSE	LIM and SH3 domain protein 1 OS=Mus musculus GN=Lasp1 PE=1 SV=1	1.417	0.002	3.8063e+06	5131572
FUBP2_MOUSE	Far upstream element-binding protein 2 OS=Mus musculus GN=Khsrp PE=1 SV=1	1.353	0.004	1775761	2385753
MINP1_MOUSE	Multiple inositol polyphosphate phosphatase 1 OS=Mus musculus GN=Minpp1 PE=1 SV=2	1.352	8.945e-06	777079	1.07275e+06
PAFA2_MOUSE	Platelet-activating factor acetylhydrolase 2, cytoplasmic OS=Mus musculus GN=Pafah2 PE=2 SV=1	1.352	0.058	2.45179e+06	2966946
GNS_MOUSE	N-acetylglucosamine-6-sulfatase OS=Mus musculus GN=Gns PE=2 SV=1	1.331	0.204	1.3359e+06	1.90714e+06
ATX1L_MOUSE	Ataxin-1-like OS=Mus musculus GN=Atxn1l PE=1 SV=1	1.329	0.028	721025	965099
CATB_MOUSE	Cathepsin B OS=Mus musculus GN=Ctsb PE=1 SV=2	1.319	0.21	3957397	6322319
CNOT4_MOUSE	Isoform 2 of CCR4-NOT transcription complex subunit 4 OS=Mus musculus GN=Cnot4	1.311	6.485e-07	1.83819e+06	2409358
ZFR_MOUSE	Zinc finger RNA-binding protein OS=Mus musculus GN=Zfr PE=1 SV=2	1.297	0.359	2858959	3.65385e+06
NENF_MOUSE	Neudesin OS=Mus musculus GN=Nenf PE=1 SV=1	1.286	0.035	1.27609e+06	1642676
HN1L_MOUSE	Hematological and neurological expressed 1-like protein OS=Mus musculus GN=Hn1l PE=2 SV=1	1.284	0.05	1.40943e+06	1.8131e+06
GORS2_MOUSE	Golgi reassembly-stacking protein 2 OS=Mus musculus GN=Gorasp2 PE=1 SV=3	1.284	1.122e-09	3814746	4877260
CATZ_MOUSE	Cathepsin Z OS=Mus musculus GN=Ctsz PE=2 SV=1	1.278	0.224	5.58933e+06	7.0466e+06
OCTC_MOUSE	Peroxisomal carnitine O-octanoyltransferase OS=Mus musculus GN=Crot PE=1 SV=1	1.269	0.09	571843	726043
KPCI_MOUSE	Protein kinase C iota type OS=Mus musculus GN=Prkci PE=1 SV=3	1.26	0.143	885918	1.11908e+06
GRN_MOUSE	Granulins OS=Mus musculus GN=Grn PE=1 SV=2	1.26	0.0003784	2.06435e+06	2.67619e+06
PLCC_MOUSE	1-acyl-sn-glycerol-3-phosphate acyltransferase gamma OS=Mus musculus GN=Agpat3 PE=1 SV=2	1.256	3.784e-05	3.97477e+06	4.99624e+06
ERO1A_MOUSE	ERO1-like protein alpha OS=Mus musculus GN=Ero1l PE=1 SV=2	1.256	5.759e-07	3.85e+06	4933365
DBNL_MOUSE	Isoform 2 of Drebrin-like protein OS=Mus musculus GN=Dbnl	1.256	0.018	1.91734e+06	2368617
SP130_MOUSE	Isoform 2 of Histone deacetylase complex subunit SAP130 OS=Mus musculus GN=Sap130	1.252	0.277	1.41022e+06	1.77198e+06
BAX_MOUSE	Apoptosis regulator BAX OS=Mus musculus GN=Bax PE=1 SV=1	1.251	0.006	918545	1.14865e+06
MP2K1_MOUSE	Dual specificity mitogen-activated protein kinase kinase 1 OS=Mus musculus GN=Map2k1 PE=1 SV=2	1.25	0.044	1.37556e+06	1.59654e+06
PURA2_MOUSE	Adenylosuccinate synthetase isozyme 2 OS=Mus musculus GN=Adss PE=1 SV=2	1.246	0.222	770850	964066
RISC_MOUSE	Retinoid-inducible serine carboxypeptidase OS=Mus musculus GN=Scpep1 PE=2 SV=1	1.244	0.051	1.02445e+06	1.27552e+06
OTUB1_MOUSE	Ubiquitin thioesterase OTUB1 OS=Mus musculus GN=Otub1 PE=1 SV=2	1.241	0.207	1.78372e+06	2.07622e+06
MBNL2_MOUSE	Isoform 2 of Muscleblind-like protein 2 OS=Mus musculus GN=Mbnl2	1.236	1.856e-06	4288849	5182883
PLST_MOUSE	Plastin-3 OS=Mus musculus GN=Pls3 PE=1 SV=3	1.227	0.529	9218478	18155648
ARI1A_MOUSE	AT-rich interactive domain-containing protein 1A OS=Mus musculus GN=Arid1a PE=1 SV=1	1.225	0.779	1226477	1.50805e+06
DEST_MOUSE	Destrin OS=Mus musculus GN=Dstn PE=1 SV=3	1.225	0.009	1.2434e+06	1.43414e+06
FAF1_MOUSE	FAS-associated factor 1 OS=Mus musculus GN=Faf1 PE=1 SV=1	1.222	0.051	943745	1.14586e+06
FOXK1_MOUSE	Forkhead box protein K1 OS=Mus musculus GN=Foxk1 PE=1 SV=2	1.219	0.011	1.82056e+06	2.24141e+06
IF6_MOUSE	Eukaryotic translation initiation factor 6 OS=Mus musculus GN=Eif6 PE=1 SV=2	1.213	0.003	3.13089e+06	3.56715e+06
SUMO3_MOUSE	Small ubiquitin-related modifier 2 OS=Mus musculus GN=Sumo2 PE=2 SV=1	1.212	3.172e-06	4279767	5.1902e+06
SESN2_MOUSE	Sestrin-2 OS=Mus musculus GN=Sesn2 PE=2 SV=1	1.211	0.085	503785	611111
AATM_MOUSE	Aspartate aminotransferase, mitochondrial OS=Mus musculus GN=Got2 PE=1 SV=1	1.207	0.0001723	1366551	1.67074e+06
HNRH1_MOUSE	Heterogeneous nuclear ribonucleoprotein H OS=Mus musculus GN=Hnrnph1 PE=1 SV=3	1.206	0.219	1.77649e+06	2.04982e+06
CTBP1_MOUSE	C-terminal-binding protein 1 OS=Mus musculus GN=Ctbp1 PE=1 SV=2	1.202	0.005	3.65488e+06	4293843
MOES_MOUSE	Moesin OS=Mus musculus GN=Msn PE=1 SV=3	1.2	0.001	961654	1.15512e+06
PDIA3_MOUSE	Protein disulfide-isomerase A3 OS=Mus musculus GN=Pdia3 PE=1 SV=2	1.199	0.0005215	2.25553e+06	2.65421e+06
BGAL_MOUSE	Beta-galactosidase OS=Mus musculus GN=Glb1 PE=2 SV=1	1.19	0.003	1.42954e+06	1.6975e+06
PMM2_MOUSE	Phosphomannomutase 2 OS=Mus musculus GN=Pmm2 PE=2 SV=1	1.182	0.002	2776121	3282551
EMAL2_MOUSE	Echinoderm microtubule-associated protein-like 2 OS=Mus musculus GN=Eml2 PE=2 SV=1	1.178	0.485	4.17515e+06	4483749
PDIA6_MOUSE	Protein disulfide-isomerase A6 OS=Mus musculus GN=Pdia6 PE=1 SV=3	1.174	0.052	393022	475866
CALR_MOUSE	Calreticulin OS=Mus musculus GN=Calr PE=1 SV=1	1.173	4.111e-09	7813341	9214438
RHOG_MOUSE	Rho-related GTP-binding protein RhoG OS=Mus musculus GN=Rhog PE=2 SV=1	1.169	0.274	815847	954332
IF5_MOUSE	Eukaryotic translation initiation factor 5 OS=Mus musculus GN=Eif5 PE=1 SV=1	1.168	0.306	2519853	3.68201e+06
HBA_MOUSE	Hemoglobin subunit alpha OS=Mus musculus GN=Hba PE=1 SV=2	1.165	5.785e-05	11964189	13863292
ERH_MOUSE	Enhancer of rudimentary homolog OS=Mus musculus GN=Erh PE=1 SV=1	1.163	0.211	690870	803450
FUCO2_MOUSE	Plasma alpha-L-fucosidase OS=Mus musculus GN=Fuca2 PE=2 SV=1	1.162	0.072	2513936	2.96503e+06
CAN1_MOUSE	Calpain-1 catalytic subunit OS=Mus musculus GN=Capn1 PE=2 SV=1	1.16	0.081	1.10455e+06	1.23308e+06
SK2L2_MOUSE	Superkiller viralicidic activity 2-like 2 OS=Mus musculus GN=Skiv2l2 PE=2 SV=1	1.16	0.012	3.86246e+06	4477578
MTNA_MOUSE	Methylthioribose-1-phosphate isomerase OS=Mus musculus GN=Mri1 PE=2 SV=1	1.157	0.188	2414030	2427249
PPM1G_MOUSE	Protein phosphatase 1G OS=Mus musculus GN=Ppm1g PE=2 SV=3	1.151	0.523	1.67276e+06	2.08524e+06
PPGB_MOUSE	Lysosomal protective protein OS=Mus musculus GN=Ctsa PE=1 SV=1	1.148	0.68	2.0036e+06	2.18354e+06
LYPL1_MOUSE	Lysophospholipase-like protein 1 OS=Mus musculus GN=Lyplal1 PE=1 SV=3	1.148	0.613	585777	673391
IF2A_MOUSE	Eukaryotic translation initiation factor 2 subunit 1 OS=Mus musculus GN=Eif2s1 PE=1 SV=3	1.144	0.313	1.7277e+06	1763536
CCAR1_MOUSE	Isoform 2 of Cell division cycle and apoptosis regulator protein 1 OS=Mus musculus GN=Ccar1	1.143	0.0008625	2890372	3.33938e+06
PDLI7_MOUSE	PDZ and LIM domain protein 7 OS=Mus musculus GN=Pdlim7 PE=2 SV=1	1.143	0.0002906	4531032	5.08784e+06
HBB1_MOUSE	Hemoglobin subunit beta-1 OS=Mus musculus GN=Hbb-b1 PE=1 SV=2	1.138	0.01	7.03236e+06	8045973
ARF1_MOUSE	ADP-ribosylation factor 3 OS=Mus musculus GN=Arf3 PE=2 SV=2	1.136	0.114	1.3005e+06	1.35067e+06
NMRL1_MOUSE	Isoform 2 of NmrA-like family domain-containing protein 1 OS=Mus musculus GN=Nmral1	1.135	0.026	2.61685e+06	2.97046e+06
QRIC1_MOUSE	Glutamine-rich protein 1 OS=Mus musculus GN=Qrich1 PE=2 SV=1	1.135	0.02	1.40609e+06	1.596e+06
DX39B_MOUSE	Spliceosome RNA helicase Ddx39b OS=Mus musculus GN=Ddx39b PE=1 SV=1	1.134	0.056	4.82236e+06	5161053
CREG1_MOUSE	Protein CREG1 OS=Mus musculus GN=Creg1 PE=2 SV=1	1.133	0.084	2.19505e+06	2.47715e+06
PLAP_MOUSE	Phospholipase A-2-activating protein OS=Mus musculus GN=Plaa PE=2 SV=3	1.132	0.166	1809276	1.8958e+06
S10A6_MOUSE	Protein S100-A6 OS=Mus musculus GN=S100a6 PE=1 SV=3	1.132	0.0006401	14928748	16899794
RNF14_MOUSE	E3 ubiquitin-protein ligase RNF14 OS=Mus musculus GN=Rnf14 PE=2 SV=1	1.132	0.637	93207	105531
ADPRH_MOUSE	[Protein ADP-ribosylarginine] hydrolase OS=Mus musculus GN=Adprh PE=2 SV=1	1.13	0.513	1.82872e+06	1.91422e+06
TPD54_MOUSE	Tumor protein D54 OS=Mus musculus GN=Tpd52l2 PE=1 SV=1	1.126	0.001	2.86934e+06	3.19841e+06
MEMO1_MOUSE	Protein MEMO1 OS=Mus musculus GN=Memo1 PE=1 SV=1	1.125	0.066	3.85073e+06	4417930
UCK2_MOUSE	Uridine-cytidine kinase 2 OS=Mus musculus GN=Uck2 PE=1 SV=1	1.125	0.054	1.4507e+06	1.6323e+06
PEF1_MOUSE	Peflin OS=Mus musculus GN=Pef1 PE=2 SV=1	1.12	0.217	1.09975e+06	1.23294e+06
MYO1C_MOUSE	Isoform 2 of Myosin-Ic OS=Mus musculus GN=Myo1c	1.12	0.115	905939	1.01496e+06
GLO2_MOUSE	Hydroxyacylglutathione hydrolase, mitochondrial OS=Mus musculus GN=Hagh PE=2 SV=2	1.119	0.173	4913796	5.28238e+06
CNPY2_MOUSE	Protein canopy homolog 2 OS=Mus musculus GN=Cnpy2 PE=2 SV=1	1.118	0.206	765016	855417
TXD17_MOUSE	Thioredoxin domain-containing protein 17 OS=Mus musculus GN=Txndc17 PE=1 SV=1	1.117	0.596	3.0688e+06	3.28422e+06
CTBP2_MOUSE	C-terminal-binding protein 2 OS=Mus musculus GN=Ctbp2 PE=1 SV=2	1.116	0.083	1.37434e+06	1.53414e+06
KDM3B_MOUSE	Lysine-specific demethylase 3B OS=Mus musculus GN=Kdm3b PE=1 SV=2	1.116	0.561	1.26173e+06	1.47403e+06
PROSC_MOUSE	Proline synthase co-transcribed bacterial homolog protein OS=Mus musculus GN=Prosc PE=1 SV=1	1.114	0.234	1.65932e+06	1.78196e+06
MGDP1_MOUSE	Magnesium-dependent phosphatase 1 OS=Mus musculus GN=Mdp1 PE=1 SV=1	1.114	0.217	914694	1.01707e+06
SNX27_MOUSE	Sorting nexin-27 OS=Mus musculus GN=Snx27 PE=1 SV=2	1.114	0.186	893933	995519
WDR43_MOUSE	WD repeat-containing protein 43 OS=Mus musculus GN=Wdr43 PE=1 SV=2	1.113	0.541	83738.3	92885.3
RBBP7_MOUSE	Histone-binding protein RBBP7 OS=Mus musculus GN=Rbbp7 PE=1 SV=1	1.109	0.286	3.86706e+06	4187968
PICA_MOUSE	Isoform 5 of Phosphatidylinositol-binding clathrin assembly protein OS=Mus musculus GN=Picalm	1.109	3.931e-10	7.94326e+06	8838059
LPXN_MOUSE	Leupaxin OS=Mus musculus GN=Lpxn PE=1 SV=2	1.108	0.618	826081	932478
CATC_MOUSE	Dipeptidyl peptidase 1 OS=Mus musculus GN=Ctsc PE=2 SV=1	1.105	0.47	5.68997e+06	5.44613e+06
PPM1B_MOUSE	Isoform Beta-2 of Protein phosphatase 1B OS=Mus musculus GN=Ppm1b	1.104	0.479	2.08927e+06	2.31133e+06
PEBB_MOUSE	Isoform 2 of Core-binding factor subunit beta OS=Mus musculus GN=Cbfb	1.101	0.395	956521	990434
RTTN_MOUSE	Rotatin OS=Mus musculus GN=Rttn PE=2 SV=2	1.1	0.0009042	19105882	21084148
BAF_MOUSE	Barrier-to-autointegration factor OS=Mus musculus GN=Banf1 PE=1 SV=1	1.1	0.334	489314	538098
LEG1_MOUSE	Galectin-1 OS=Mus musculus GN=Lgals1 PE=1 SV=3	1.1	0.029	26998732	29737036
DOHH_MOUSE	Deoxyhypusine hydroxylase OS=Mus musculus GN=Dohh PE=2 SV=2	1.099	0.374	661574	726553
AN32E_MOUSE	Acidic leucine-rich nuclear phosphoprotein 32 family member E OS=Mus musculus GN=Anp32e PE=1 SV=2	1.098	0.394	1.88007e+06	2100341
MPI_MOUSE	Mannose-6-phosphate isomerase OS=Mus musculus GN=Mpi PE=2 SV=1	1.097	0.375	1.38589e+06	1.52262e+06
GRP78_MOUSE	78 kDa glucose-regulated protein OS=Mus musculus GN=Hspa5 PE=1 SV=3	1.096	0.392	4.42252e+06	5050819
RBM4_MOUSE	Isoform 2 of RNA-binding protein 4 OS=Mus musculus GN=Rbm4	1.091	0.639	557423	609783
RIC8A_MOUSE	Synembryn-A OS=Mus musculus GN=Ric8a PE=1 SV=2	1.088	0.648	256576	279231
NCOA1_MOUSE	Isoform 2 of Nuclear receptor coactivator 1 OS=Mus musculus GN=Ncoa1	1.088	0.586	875913	983016
MYL6_MOUSE	Myosin light polypeptide 6 OS=Mus musculus GN=Myl6 PE=1 SV=3	1.086	0.487	956292	1.03889e+06
PDCD2_MOUSE	Programmed cell death protein 2 OS=Mus musculus GN=Pdcd2 PE=2 SV=2	1.085	0.301	1.9931e+06	2163814
HNRPF_MOUSE	Heterogeneous nuclear ribonucleoprotein F OS=Mus musculus GN=Hnrnpf PE=1 SV=3	1.085	0.0009402	14806495	16367178
BAG4_MOUSE	BAG family molecular chaperone regulator 4 OS=Mus musculus GN=Bag4 PE=1 SV=2	1.085	0.356	1.78914e+06	1.80507e+06
TBCA_MOUSE	Tubulin-specific chaperone A OS=Mus musculus GN=Tbca PE=2 SV=3	1.085	0.483	1.54625e+06	1.67805e+06
CX038_MOUSE	Uncharacterized protein CXorf38 homolog OS=Mus musculus PE=2 SV=1	1.084	0.504	1.30239e+06	1414054
MLKL_MOUSE	Mixed lineage kinase domain-like protein OS=Mus musculus GN=Mlkl PE=2 SV=1	1.083	0.425	1.29788e+06	1.40474e+06
FUCO_MOUSE	Tissue alpha-L-fucosidase OS=Mus musculus GN=Fuca1 PE=2 SV=1	1.081	0.246	1.41324e+06	1.59827e+06
RN126_MOUSE	RING finger protein 126 OS=Mus musculus GN=Rnf126 PE=1 SV=1	1.079	0.331	1.08702e+06	1.17417e+06
ADK_MOUSE	Adenosine kinase OS=Mus musculus GN=Adk PE=1 SV=2	1.079	0.4	2.17115e+06	2.20486e+06
UBAP2_MOUSE	Ubiquitin-associated protein 2 OS=Mus musculus GN=Ubap2 PE=2 SV=1	1.078	0.031	5.44673e+06	5876132
CBX1_MOUSE	Chromobox protein homolog 1 OS=Mus musculus GN=Cbx1 PE=1 SV=1	1.075	0.307	1.60938e+06	1731186
MDHM_MOUSE	Malate dehydrogenase, mitochondrial OS=Mus musculus GN=Mdh2 PE=1 SV=3	1.075	0.482	1.71013e+06	1.77419e+06
GSH1_MOUSE	Glutamate--cysteine ligase catalytic subunit OS=Mus musculus GN=Gclc PE=2 SV=4	1.074	0.591	1.11005e+06	1202896
TFIP8_MOUSE	Tumor necrosis factor alpha-induced protein 8 OS=Mus musculus GN=Tnfaip8 PE=2 SV=1	1.073	0.226	2.10358e+06	2233802
SUGT1_MOUSE	Suppressor of G2 allele of SKP1 homolog OS=Mus musculus GN=Sugt1 PE=2 SV=3	1.073	0.244	453460	487121
VIME_MOUSE	Vimentin OS=Mus musculus GN=Vim PE=1 SV=3	1.072	0.429	1.12063e+06	1.23469e+06
DOPD_MOUSE	D-dopachrome decarboxylase OS=Mus musculus GN=Ddt PE=1 SV=3	1.072	0.605	1.6843e+06	1.80935e+06
CYC_MOUSE	Cytochrome c, somatic OS=Mus musculus GN=Cycs PE=1 SV=2	1.072	0.264	1.87739e+06	2011709
CPNE2_MOUSE	Copine-2 OS=Mus musculus GN=Cpne2 PE=2 SV=1	1.071	0.212	2.41585e+06	2.60255e+06
PTGR2_MOUSE	Prostaglandin reductase 2 OS=Mus musculus GN=Ptgr2 PE=1 SV=2	1.071	0.306	2.15549e+06	2233778
ITPA_MOUSE	Inosine triphosphate pyrophosphatase OS=Mus musculus GN=Itpa PE=2 SV=2	1.07	0.778	636761	635302
SCLY_MOUSE	Selenocysteine lyase OS=Mus musculus GN=Scly PE=1 SV=1	1.069	0.66	1.06968e+06	1.15123e+06
PITC1_MOUSE	Isoform 2 of Cytoplasmic phosphatidylinositol transfer protein 1 OS=Mus musculus GN=Pitpnc1	1.069	0.574	832563	853998
LGMN_MOUSE	Legumain OS=Mus musculus GN=Lgmn PE=1 SV=1	1.066	0.525	695124	734562
CBX3_MOUSE	Chromobox protein homolog 3 OS=Mus musculus GN=Cbx3 PE=1 SV=2	1.066	0.273	1.87701e+06	2.01886e+06
PCNA_MOUSE	Proliferating cell nuclear antigen OS=Mus musculus GN=Pcna PE=1 SV=2	1.065	0.228	9929595	10391613
SYG_MOUSE	Glycyl-tRNA synthetase OS=Mus musculus GN=Gars PE=1 SV=1	1.065	0.639	1.09062e+06	852068
PITH1_MOUSE	PITH domain-containing protein 1 OS=Mus musculus GN=Pithd1 PE=2 SV=1	1.065	0.086	2.31791e+06	2470858
HEM6_MOUSE	Coproporphyrinogen-III oxidase, mitochondrial OS=Mus musculus GN=Cpox PE=1 SV=2	1.063	0.616	1.2749e+06	1.35097e+06
LANC1_MOUSE	LanC-like protein 1 OS=Mus musculus GN=Lancl1 PE=1 SV=1	1.062	0.576	2.13811e+06	2.30582e+06
FNTB_MOUSE	Protein farnesyltransferase subunit beta OS=Mus musculus GN=Fntb PE=2 SV=1	1.062	0.457	2313573	2308856
RPE_MOUSE	Ribulose-phosphate 3-epimerase OS=Mus musculus GN=Rpe PE=2 SV=1	1.062	0.474	1.29771e+06	1382780
FABP5_MOUSE	Fatty acid-binding protein, epidermal OS=Mus musculus GN=Fabp5 PE=1 SV=3	1.062	0.265	14462239	15242550
I10R2_MOUSE	Interleukin-10 receptor subunit beta OS=Mus musculus GN=Il10rb PE=1 SV=1	1.061	0.677	2984886	3.16239e+06
CE110_MOUSE	Centriolin OS=Mus musculus GN=Cep110 PE=2 SV=2	1.061	0.101	6367840	6754133
PDIA1_MOUSE	Protein disulfide-isomerase OS=Mus musculus GN=P4hb PE=1 SV=1	1.061	0.062	2.32561e+06	2.48014e+06
SKP1_MOUSE	S-phase kinase-associated protein 1 OS=Mus musculus GN=Skp1 PE=1 SV=3	1.06	0.44	1.66171e+06	1760685
AGFG1_MOUSE	Isoform 1 of Arf-GAP domain and FG repeats-containing protein 1 OS=Mus musculus GN=Agfg1	1.059	0.043	8919761	9403509
CAPZB_MOUSE	Isoform 2 of F-actin-capping protein subunit beta OS=Mus musculus GN=Capzb	1.059	0.445	4.01229e+06	4313158
HNRL1_MOUSE	Heterogeneous nuclear ribonucleoprotein U-like protein 1 OS=Mus musculus GN=Hnrnpul1 PE=1 SV=1	1.059	0.163	2.43119e+06	2641152
ERP29_MOUSE	Endoplasmic reticulum resident protein 29 OS=Mus musculus GN=Erp29 PE=1 SV=2	1.059	0.724	705872	749664
BTK_MOUSE	Tyrosine-protein kinase BTK OS=Mus musculus GN=Btk PE=1 SV=4	1.058	0.528	1.18662e+06	1270592
ASM_MOUSE	Sphingomyelin phosphodiesterase OS=Mus musculus GN=Smpd1 PE=2 SV=2	1.057	0.715	1.03696e+06	1.0972e+06
GNAI2_MOUSE	Guanine nucleotide-binding protein G(i) subunit alpha-2 OS=Mus musculus GN=Gnai2 PE=1 SV=4	1.054	0.552	1.31407e+06	1.38426e+06
MEX3D_MOUSE	RNA-binding protein MEX3D OS=Mus musculus GN=Mex3d PE=2 SV=2	1.053	0.416	3.37382e+06	3.55464e+06
PPP5_MOUSE	Serine/threonine-protein phosphatase 5 OS=Mus musculus GN=Ppp5c PE=2 SV=2	1.053	0.744	806499	850818
MA2B2_MOUSE	Epididymis-specific alpha-mannosidase OS=Mus musculus GN=Man2b2 PE=2 SV=2	1.052	0.633	1637390	1.64798e+06
NC2B_MOUSE	Protein Dr1 OS=Mus musculus GN=Dr1 PE=2 SV=1	1.052	0.293	2.1049e+06	2.2138e+06
QSOX1_MOUSE	Isoform 2 of Sulfhydryl oxidase 1 OS=Mus musculus GN=Qsox1	1.051	0.365	2.46199e+06	2.5174e+06
CNBP_MOUSE	Isoform 2 of Cellular nucleic acid-binding protein OS=Mus musculus GN=Cnbp	1.05	0.203	12373118	13124435
PTPM1_MOUSE	Protein-tyrosine phosphatase mitochondrial 1 OS=Mus musculus GN=Ptpmt1 PE=1 SV=1	1.048	0.367	8848544	9280118
STRAP_MOUSE	Serine-threonine kinase receptor-associated protein OS=Mus musculus GN=Strap PE=1 SV=2	1.047	0.415	2881928	3.03398e+06
PPIA_MOUSE	Peptidyl-prolyl cis-trans isomerase A OS=Mus musculus GN=Ppia PE=1 SV=2	1.047	0.023	27109748	28721974
TPM3_MOUSE	Isoform 2 of Tropomyosin alpha-3 chain OS=Mus musculus GN=Tpm3	1.046	0.292	8161428	8530048
ATG4B_MOUSE	Cysteine protease ATG4B OS=Mus musculus GN=Atg4b PE=1 SV=2	1.046	0.773	740232	774957
NUCL_MOUSE	Nucleolin OS=Mus musculus GN=Ncl PE=1 SV=2	1.046	0.763	971004	1.00675e+06
ANKY2_MOUSE	Ankyrin repeat and MYND domain-containing protein 2 OS=Mus musculus GN=Ankmy2 PE=1 SV=1	1.045	0.658	1.3098e+06	1369648
K2C73_MOUSE	Keratin, type II cytoskeletal 73 OS=Mus musculus GN=Krt73 PE=1 SV=1	1.045	0.083	31354200	32765500
IF5A1_MOUSE	Eukaryotic translation initiation factor 5A-1 OS=Mus musculus GN=Eif5a PE=1 SV=2	1.045	0.289	6781364	6.97134e+06
ARL1_MOUSE	ADP-ribosylation factor-like protein 1 OS=Mus musculus GN=Arl1 PE=2 SV=1	1.044	0.646	1.14554e+06	1.1941e+06
NRF1_MOUSE	Nuclear respiratory factor 1 OS=Mus musculus GN=Nrf1 PE=2 SV=1	1.043	0.539	1.97792e+06	2.06138e+06
F136A_MOUSE	Protein FAM136A OS=Mus musculus GN=Fam136a PE=1 SV=1	1.043	0.17	6722606	6925196
SH3L1_MOUSE	SH3 domain-binding glutamic acid-rich-like protein OS=Mus musculus GN=Sh3bgrl PE=2 SV=1	1.042	0.295	2.17827e+06	2.2614e+06
NUDC2_MOUSE	NudC domain-containing protein 2 OS=Mus musculus GN=Nudcd2 PE=1 SV=1	1.042	0.558	1.67429e+06	1.76723e+06
ACTG_MOUSE	Actin, cytoplasmic 1 OS=Mus musculus GN=Actb PE=1 SV=1	1.041	0.0003358	58699092	61679484
PICA_MOUSE	Isoform 6 of Phosphatidylinositol-binding clathrin assembly protein OS=Mus musculus GN=Picalm	1.038	0.207	2471623	2.57153e+06
ASNA_MOUSE	ATPase Asna1 OS=Mus musculus GN=Asna1 PE=1 SV=2	1.037	0.446	2303110	2364877
TEBP_MOUSE	Prostaglandin E synthase 3 OS=Mus musculus GN=Ptges3 PE=1 SV=1	1.037	0.626	14727569	15525366
PPID_MOUSE	Peptidyl-prolyl cis-trans isomerase D OS=Mus musculus GN=Ppid PE=1 SV=3	1.036	0.77	1.04659e+06	1.08031e+06
SORCN_MOUSE	Sorcin OS=Mus musculus GN=Sri PE=1 SV=1	1.034	0.096	21402904	22001492
CDK1_MOUSE	Cyclin-dependent kinase 1 OS=Mus musculus GN=Cdk1 PE=1 SV=3	1.034	0.913	3079693	3324936
LICH_MOUSE	Lysosomal acid lipase/cholesteryl ester hydrolase OS=Mus musculus GN=Lipa PE=2 SV=1	1.033	0.83	904878	933459
ACTC_MOUSE	Actin, alpha cardiac muscle 1 OS=Mus musculus GN=Actc1 PE=1 SV=1	1.032	0.066	130027240	134848336
HMGB1_MOUSE	High mobility group protein B1 OS=Mus musculus GN=Hmgb1 PE=1 SV=2	1.032	0.183	7.11737e+06	7.34408e+06
AGAL_MOUSE	Alpha-galactosidase A OS=Mus musculus GN=Gla PE=1 SV=1	1.032	0.574	2726282	2.81311e+06
NEUG_MOUSE	Neurogranin OS=Mus musculus GN=Nrgn PE=1 SV=1	1.031	0.578	1.2039e+06	1.24054e+06
GSH0_MOUSE	Glutamate--cysteine ligase regulatory subunit OS=Mus musculus GN=Gclm PE=2 SV=1	1.031	0.455	6872161	7108589
PLEK_MOUSE	Pleckstrin OS=Mus musculus GN=Plek PE=1 SV=1	1.03	0.644	1.15648e+06	1.19363e+06
TF2AA_MOUSE	Transcription initiation factor IIA subunit 1 OS=Mus musculus GN=Gtf2a1 PE=2 SV=2	1.029	0.527	7.21419e+06	7.42003e+06
IMB1_MOUSE	Importin subunit beta-1 OS=Mus musculus GN=Kpnb1 PE=1 SV=1	1.028	0.849	600686	660508
SMAP1_MOUSE	Stromal membrane-associated protein 1 OS=Mus musculus GN=Smap1 PE=1 SV=1	1.028	0.386	7.06898e+06	7273349
CHRD1_MOUSE	Cysteine and histidine-rich domain-containing protein 1 OS=Mus musculus GN=Chordc1 PE=1 SV=1	1.026	0.652	1.32878e+06	1.34924e+06
COMD3_MOUSE	COMM domain-containing protein 3 OS=Mus musculus GN=Commd3 PE=2 SV=1	1.026	0.8	790096	824011
SRSF3_MOUSE	Serine/arginine-rich splicing factor 3 OS=Mus musculus GN=Srsf3 PE=2 SV=1	1.026	0.776	1282010	1.24493e+06
RAN_MOUSE	GTP-binding nuclear protein Ran OS=Mus musculus GN=Ran PE=1 SV=3	1.025	0.429	12851020	13118037
EWS_MOUSE	RNA-binding protein EWS OS=Mus musculus GN=Ewsr1 PE=1 SV=1	1.025	0.629	6677197	6842202
COF1_MOUSE	Cofilin-1 OS=Mus musculus GN=Cfl1 PE=1 SV=3	1.024	0.647	11624720	11846805
KCY_MOUSE	UMP-CMP kinase OS=Mus musculus GN=Cmpk1 PE=1 SV=1	1.024	0.751	2.83612e+06	2.96727e+06
PRC2C_MOUSE	Isoform 2 of Protein PRRC2C OS=Mus musculus GN=Prrc2c	1.022	0.607	3.20532e+06	3237964
GLOD4_MOUSE	Isoform 2 of Glyoxalase domain-containing protein 4 OS=Mus musculus GN=Glod4	1.022	0.401	8552946	8839805
PAK2_MOUSE	Serine/threonine-protein kinase PAK 2 OS=Mus musculus GN=Pak2 PE=1 SV=1	1.022	0.88	864775	884603
LACB2_MOUSE	Beta-lactamase-like protein 2 OS=Mus musculus GN=Lactb2 PE=1 SV=1	1.021	0.761	2365034	2336375
NTF2_MOUSE	Nuclear transport factor 2 OS=Mus musculus GN=Nutf2 PE=2 SV=1	1.02	0.569	16113116	16436204
STAT3_MOUSE	Isoform Stat3B of Signal transducer and activator of transcription 3 OS=Mus musculus GN=Stat3	1.02	0.79	1.75384e+06	1.78918e+06
SF01_MOUSE	Isoform CW17E of Splicing factor 1 OS=Mus musculus GN=Sf1	1.02	0.614	8911643	9302757
DX39A_MOUSE	ATP-dependent RNA helicase DDX39A OS=Mus musculus GN=Ddx39a PE=2 SV=1	1.019	0.684	2.44581e+06	2422097
NUP62_MOUSE	Nuclear pore glycoprotein p62 OS=Mus musculus GN=Nup62 PE=1 SV=2	1.019	0.525	8.21879e+06	8347950
PAXI_MOUSE	Paxillin OS=Mus musculus GN=Pxn PE=1 SV=1	1.019	0.64	7.59407e+06	7724962
RN181_MOUSE	E3 ubiquitin-protein ligase RNF181 OS=Mus musculus GN=Rnf181 PE=2 SV=1	1.018	0.676	10457398	10656852
FA65A_MOUSE	Protein FAM65A OS=Mus musculus GN=Fam65a PE=1 SV=1	1.018	0.697	2.09594e+06	2.20168e+06
NISCH_MOUSE	Isoform 2 of Nischarin OS=Mus musculus GN=Nisch	1.018	0.833	1.72165e+06	1.75329e+06
PRC2B_MOUSE	Protein PRRC2B OS=Mus musculus GN=Prrc2b PE=1 SV=1	1.018	0.908	1051031	1.06895e+06
TBB5_MOUSE	Tubulin beta-5 chain OS=Mus musculus GN=Tubb5 PE=1 SV=1	1.017	0.359	25230320	25218628
TAGL2_MOUSE	Transgelin-2 OS=Mus musculus GN=Tagln2 PE=1 SV=4	1.017	0.628	4.02988e+06	4206572
PCBP1_MOUSE	Poly(rC)-binding protein 1 OS=Mus musculus GN=Pcbp1 PE=1 SV=1	1.017	0.721	10916797	11291220
ARL3_MOUSE	ADP-ribosylation factor-like protein 3 OS=Mus musculus GN=Arl3 PE=1 SV=1	1.016	0.911	1.00972e+06	1.02776e+06
KAD2_MOUSE	Adenylate kinase 2, mitochondrial OS=Mus musculus GN=Ak2 PE=1 SV=5	1.016	0.706	7352876	7420680
BLVRB_MOUSE	Flavin reductase OS=Mus musculus GN=Blvrb PE=2 SV=3	1.016	0.678	11344438	11411741
TRM2A_MOUSE	tRNA (uracil-5-)-methyltransferase homolog A OS=Mus musculus GN=Trmt2a PE=2 SV=1	1.015	0.845	1.37462e+06	1.39541e+06
ANR17_MOUSE	Ankyrin repeat domain-containing protein 17 OS=Mus musculus GN=Ankrd17 PE=1 SV=2	1.014	0.778	5084977	5.26821e+06
PIMT_MOUSE	Protein-L-isoaspartate(D-aspartate) O-methyltransferase OS=Mus musculus GN=Pcmt1 PE=1 SV=3	1.014	0.762	3.41319e+06	3.39691e+06
KTHY_MOUSE	Thymidylate kinase OS=Mus musculus GN=Dtymk PE=2 SV=2	1.013	0.911	2.73469e+06	2892418
NP1L1_MOUSE	Nucleosome assembly protein 1-like 1 OS=Mus musculus GN=Nap1l1 PE=1 SV=2	1.013	0.895	1.75012e+06	1.77196e+06
APEX1_MOUSE	DNA-(apurinic or apyrimidinic site) lyase OS=Mus musculus GN=Apex1 PE=1 SV=2	1.013	0.891	1.19366e+06	1.26959e+06
WNK1_MOUSE	Isoform 2 of Serine/threonine-protein kinase WNK1 OS=Mus musculus GN=Wnk1	1.012	0.719	4.986e+06	5047856
ARI1_MOUSE	Protein ariadne-1 homolog OS=Mus musculus GN=Arih1 PE=2 SV=3	1.011	0.783	1.45889e+06	1.4788e+06
ZN703_MOUSE	Zinc finger protein 703 OS=Mus musculus GN=Znf703 PE=1 SV=1	1.011	0.951	197494	199750
CO4A3_MOUSE	Collagen alpha-3(IV) chain OS=Mus musculus GN=Col4a3 PE=1 SV=2	1.011	0.842	9051368	9152771
WDR1_MOUSE	WD repeat-containing protein 1 OS=Mus musculus GN=Wdr1 PE=1 SV=3	1.011	0.714	9204262	9287182
1433E_MOUSE	14-3-3 protein epsilon - Mus musculus (Mouse)	1.011	0.784	9800057	9990775
HCFC1_MOUSE	Host cell factor 1 OS=Mus musculus GN=Hcfc1 PE=1 SV=1	1.01	0.774	15778442	15618564
GGA3_MOUSE	ADP-ribosylation factor-binding protein GGA3 OS=Mus musculus GN=Gga3 PE=2 SV=1	1.01	0.949	1.76946e+06	1.90481e+06
TBA1B_MOUSE	Tubulin alpha-1B chain OS=Mus musculus GN=Tuba1b PE=1 SV=2	1.01	0.642	47048492	46689908
CPIN1_MOUSE	Anamorsin OS=Mus musculus GN=Ciapin1 PE=2 SV=1	1.01	0.87	2.00647e+06	1.6026e+06
BPNT1_MOUSE	3'(2'),5'-bisphosphate nucleotidase 1 OS=Mus musculus GN=Bpnt1 PE=1 SV=2	1.009	0.966	814395	875331
RAC2_MOUSE	Ras-related C3 botulinum toxin substrate 2 OS=Mus musculus GN=Rac2 PE=2 SV=1	1.009	0.773	10458803	10622081
FKB1A_MOUSE	Peptidyl-prolyl cis-trans isomerase FKBP1A OS=Mus musculus GN=Fkbp1a PE=2 SV=2	1.009	0.822	9494796	9572684
PEBP1_MOUSE	Phosphatidylethanolamine-binding protein 1 OS=Mus musculus GN=Pebp1 PE=1 SV=3	1.008	0.812	25898414	26101424
SNX6_MOUSE	Sorting nexin-6 OS=Mus musculus GN=Snx6 PE=1 SV=1	1.008	0.959	1126089	1.13502e+06
HNRPK_MOUSE	Isoform 2 of Heterogeneous nuclear ribonucleoprotein K OS=Mus musculus GN=Hnrnpk	1.007	0.915	923814	935008
PROF1_MOUSE	Profilin-1 OS=Mus musculus GN=Pfn1 PE=1 SV=2	1.006	0.892	15295500	15510396
PRRC1_MOUSE	Protein PRRC1 OS=Mus musculus GN=Prrc1 PE=2 SV=1	1.005	0.793	24932472	25367436
SMYD5_MOUSE	SET and MYND domain-containing protein 5 OS=Mus musculus GN=Smyd5 PE=2 SV=2	1.005	0.924	4.01149e+06	3.98293e+06
EYA3_MOUSE	Eyes absent homolog 3 OS=Mus musculus GN=Eya3 PE=1 SV=1	1.005	0.879	5486551	5556647
RN114_MOUSE	RING finger protein 114 OS=Mus musculus GN=Rnf114 PE=2 SV=2	1.004	0.9	4344664	4318259
GLRX3_MOUSE	Glutaredoxin-3 OS=Mus musculus GN=Glrx3 PE=1 SV=1	1.004	0.96	3057408	3.18515e+06
MGAT3_MOUSE	Beta-1,4-mannosyl-glycoprotein 4-beta-N-acetylglucosaminyltransferase OS=Mus musculus GN=Mgat3 PE=1 SV=2	1.004	0.948	5195038	5222649
ERG_MOUSE	Isoform 2 of Transcriptional regulator ERG OS=Mus musculus GN=Erg	1.003	0.977	2.30845e+06	2214620
MIF_MOUSE	Macrophage migration inhibitory factor OS=Mus musculus GN=Mif PE=1 SV=2	1.003	0.821	56123528	56336380
HSP7C_MOUSE	Heat shock cognate 71 kDa protein OS=Mus musculus GN=Hspa8 PE=1 SV=1	1.003	0.938	6243133	6153257
RINI_MOUSE	Ribonuclease inhibitor OS=Mus musculus GN=Rnh1 PE=1 SV=1	1.002	0.959	3140649	3119079
PUR6_MOUSE	Multifunctional protein ADE2 OS=Mus musculus GN=Paics PE=1 SV=3	1.001	0.993	1.80302e+06	1812758
CDC42_MOUSE	Cell division control protein 42 homolog OS=Mus musculus GN=Cdc42 PE=1 SV=2	1	0.994	2659439	2.61185e+06
RHOA_MOUSE	Transforming protein RhoA OS=Mus musculus GN=Rhoa PE=1 SV=1	-1	0.999	2.68933e+06	2.69408e+06
F10A1_MOUSE	Hsc70-interacting protein OS=Mus musculus GN=St13 PE=2 SV=1	-1	0.995	2094534	2.07679e+06
CRKL_MOUSE	Crk-like protein OS=Mus musculus GN=Crkl PE=1 SV=2	-1.001	0.985	1.94408e+06	1.92692e+06
ATOX1_MOUSE	Copper transport protein ATOX1 OS=Mus musculus GN=Atox1 PE=2 SV=1	-1.002	0.933	5945648	5923838
CAZA1_MOUSE	F-actin-capping protein subunit alpha-1 OS=Mus musculus GN=Capza1 PE=1 SV=4	-1.003	0.964	3.45073e+06	3355198
MT2_MOUSE	Metallothionein-2 OS=Mus musculus GN=Mt2 PE=1 SV=2	-1.003	0.909	6.53043e+06	6.46893e+06
COR1A_MOUSE	Coronin-1A OS=Mus musculus GN=Coro1a PE=1 SV=5	-1.003	0.845	6193514	6.18927e+06
FRPD4_MOUSE	Isoform 2 of FERM and PDZ domain-containing protein 4 OS=Mus musculus GN=Frmpd4	-1.004	0.963	3.38088e+06	3.26078e+06
PGK1_MOUSE	Phosphoglycerate kinase 1 OS=Mus musculus GN=Pgk1 PE=1 SV=4	-1.004	0.913	16861704	17095856
1433Z_MOUSE	14-3-3 protein zeta/delta - Mus musculus (Mouse)	-1.004	0.873	13602091	13646235
THIO_MOUSE	Thioredoxin OS=Mus musculus GN=Txn PE=1 SV=3	-1.005	0.823	49215884	49142980
CLIC1_MOUSE	Chloride intracellular channel protein 1 OS=Mus musculus GN=Clic1 PE=1 SV=3	-1.005	0.881	11567468	11693237
STMN1_MOUSE	Stathmin OS=Mus musculus GN=Stmn1 PE=1 SV=2	-1.006	0.936	2.59902e+06	2457191
ALDR_MOUSE	Aldose reductase OS=Mus musculus GN=Akr1b1 PE=1 SV=3	-1.006	0.791	12482581	12523572
RANG_MOUSE	Ran-specific GTPase-activating protein OS=Mus musculus GN=Ranbp1 PE=1 SV=2	-1.006	0.88	7424730	7.30095e+06
UBP2L_MOUSE	Isoform 5 of Ubiquitin-associated protein 2-like OS=Mus musculus GN=Ubap2l	-1.006	0.796	5333339	5.41483e+06
PPAC_MOUSE	Low molecular weight phosphotyrosine protein phosphatase OS=Mus musculus GN=Acp1 PE=2 SV=3	-1.006	0.945	12014838	12091750
NCOAT_MOUSE	Bifunctional protein NCOAT OS=Mus musculus GN=Mgea5 PE=1 SV=2	-1.007	0.898	3.41016e+06	3.34935e+06
CAPG_MOUSE	Macrophage-capping protein OS=Mus musculus GN=Capg PE=1 SV=2	-1.007	0.957	1.62605e+06	1.61322e+06
IF4A1_MOUSE	Eukaryotic initiation factor 4A-I OS=Mus musculus GN=Eif4a1 PE=2 SV=1	-1.007	0.825	11827871	11703857
SYCC_MOUSE	Cysteinyl-tRNA synthetase, cytoplasmic OS=Mus musculus GN=Cars PE=1 SV=2	-1.008	0.873	5213410	5176838
GABPA_MOUSE	GA-binding protein alpha chain OS=Mus musculus GN=Gabpa PE=1 SV=1	-1.008	0.848	3.11239e+06	3.1645e+06
IQCH_MOUSE	IQ domain-containing protein H OS=Mus musculus GN=Iqch PE=2 SV=2	-1.008	0.901	1279047	1.26847e+06
TAB1_MOUSE	TGF-beta-activated kinase 1 and MAP3K7-binding protein 1 OS=Mus musculus GN=Tab1 PE=1 SV=2	-1.009	0.888	1213027	1.24708e+06
NUPL1_MOUSE	Isoform 2 of Nucleoporin p58/p45 OS=Mus musculus GN=Nupl1	-1.009	0.933	3318196	3090009
TBB2B_MOUSE	Tubulin beta-2B chain OS=Mus musculus GN=Tubb2b PE=1 SV=1	-1.009	0.813	8.08437e+06	7918463
UBE2N_MOUSE	Ubiquitin-conjugating enzyme E2 N OS=Mus musculus GN=Ube2n PE=1 SV=1	-1.01	0.81	2.25561e+06	2.22771e+06
GDIR1_MOUSE	Rho GDP-dissociation inhibitor 1 OS=Mus musculus GN=Arhgdia PE=1 SV=3	-1.011	0.773	6868684	6.83939e+06
SAE2_MOUSE	SUMO-activating enzyme subunit 2 OS=Mus musculus GN=Uba2 PE=2 SV=1	-1.011	0.79	1.42661e+06	1407648
UBR7_MOUSE	Putative E3 ubiquitin-protein ligase UBR7 OS=Mus musculus GN=Ubr7 PE=2 SV=1	-1.011	0.836	2.7311e+06	2.68246e+06
RANB3_MOUSE	Ran-binding protein 3 OS=Mus musculus GN=Ranbp3 PE=1 SV=2	-1.012	0.93	934097	864613
PRDX2_MOUSE	Peroxiredoxin-2 OS=Mus musculus GN=Prdx2 PE=1 SV=3	-1.012	0.955	2.31498e+06	2.6382e+06
UB2L3_MOUSE	Ubiquitin-conjugating enzyme E2 L3 OS=Mus musculus GN=Ube2l3 PE=2 SV=1	-1.012	0.775	5.25561e+06	5.11147e+06
HEM3_MOUSE	Porphobilinogen deaminase OS=Mus musculus GN=Hmbs PE=2 SV=1	-1.012	0.896	1.17963e+06	1.15845e+06
PUR2_MOUSE	Trifunctional purine biosynthetic protein adenosine-3 OS=Mus musculus GN=Gart PE=2 SV=2	-1.012	0.775	1736985	1715864
BROX_MOUSE	BRO1 domain-containing protein BROX OS=Mus musculus GN=Brox PE=2 SV=1	-1.012	0.758	2.24552e+06	2.19027e+06
1433F_MOUSE	14-3-3 protein eta OS=Mus musculus GN=Ywhah PE=1 SV=2	-1.012	0.825	4.27526e+06	4.01732e+06
SPRE_MOUSE	Sepiapterin reductase OS=Mus musculus GN=Spr PE=1 SV=1	-1.013	0.863	1.10354e+06	1.02939e+06
URP2_MOUSE	Fermitin family homolog 3 OS=Mus musculus GN=Fermt3 PE=1 SV=1	-1.013	0.855	1.72396e+06	1.70299e+06
TTL12_MOUSE	Tubulin--tyrosine ligase-like protein 12 OS=Mus musculus GN=Ttll12 PE=1 SV=1	-1.015	0.831	1.54436e+06	1.5092e+06
DCPS_MOUSE	Scavenger mRNA-decapping enzyme DcpS OS=Mus musculus GN=Dcps PE=1 SV=1	-1.016	0.625	2767217	2.67586e+06
AKT2_MOUSE	RAC-beta serine/threonine-protein kinase OS=Mus musculus GN=Akt2 PE=2 SV=1	-1.017	0.913	505513	487884
PTPA_MOUSE	Serine/threonine-protein phosphatase 2A activator OS=Mus musculus GN=Ppp2r4 PE=1 SV=1	-1.017	0.562	5729406	5.59523e+06
ELOB_MOUSE	Transcription elongation factor B polypeptide 2 OS=Mus musculus GN=Tceb2 PE=1 SV=1	-1.017	0.914	993620	978433
ERF3A_MOUSE	Eukaryotic peptide chain release factor GTP-binding subunit ERF3A OS=Mus musculus GN=Gspt1 PE=1 SV=1	-1.018	0.649	5278568	5.46232e+06
2AAA_MOUSE	Serine/threonine-protein phosphatase 2A 65 kDa regulatory subunit A alpha isoform OS=Mus musculus GN=Ppp2r1a PE=1 SV=3	-1.018	0.753	1.68459e+06	1.62182e+06
ACY1_MOUSE	Aminoacylase-1 OS=Mus musculus GN=Acy1 PE=1 SV=1	-1.018	0.83	2274025	2580887
EF1A1_MOUSE	Elongation factor 1-alpha 1 OS=Mus musculus GN=Eef1a1 PE=1 SV=3	-1.018	0.456	10447400	10187289
HNRPU_MOUSE	Heterogeneous nuclear ribonucleoprotein U OS=Mus musculus GN=Hnrnpu PE=1 SV=1	-1.018	0.905	1.32513e+06	1.40928e+06
SBNO1_MOUSE	Protein strawberry notch homolog 1 OS=Mus musculus GN=Sbno1 PE=1 SV=2	-1.02	0.865	1.37498e+06	1.43459e+06
AK1CD_MOUSE	Aldo-keto reductase family 1 member C13 OS=Mus musculus GN=Akr1c13 PE=1 SV=2	-1.02	0.455	9189435	9178956
RBM27_MOUSE	RNA-binding protein 27 OS=Mus musculus GN=Rbm27 PE=2 SV=2	-1.02	0.849	647264	635820
CSK_MOUSE	Tyrosine-protein kinase CSK OS=Mus musculus GN=Csk PE=1 SV=1	-1.02	0.754	2.85733e+06	2.7167e+06
AMPM1_MOUSE	Methionine aminopeptidase 1 OS=Mus musculus GN=Metap1 PE=2 SV=1	-1.021	0.922	254430	249289
ZC3HA_MOUSE	Zinc finger CCCH domain-containing protein 10 OS=Mus musculus GN=Zc3h10 PE=2 SV=1	-1.021	0.93	1.18444e+06	1.24752e+06
COTL1_MOUSE	Coactosin-like protein OS=Mus musculus GN=Cotl1 PE=1 SV=3	-1.021	0.782	2.16068e+06	2123557
PRDX6_MOUSE	Peroxiredoxin-6 OS=Mus musculus GN=Prdx6 PE=1 SV=3	-1.021	0.569	3.94046e+06	3.78472e+06
PTER_MOUSE	Phosphotriesterase-related protein OS=Mus musculus GN=Pter PE=2 SV=1	-1.022	0.741	1.66318e+06	1.70411e+06
NUBP2_MOUSE	Cytosolic Fe-S cluster assembly factor NUBP2 OS=Mus musculus GN=Nubp2 PE=1 SV=1	-1.022	0.841	661692	643130
CATO_MOUSE	Cathepsin O OS=Mus musculus GN=Ctso PE=2 SV=1	-1.022	0.893	723669	708499
PRPS1_MOUSE	Ribose-phosphate pyrophosphokinase 1 OS=Mus musculus GN=Prps1 PE=1 SV=3	-1.023	0.662	2683570	2.60094e+06
HINT1_MOUSE	Histidine triad nucleotide-binding protein 1 OS=Mus musculus GN=Hint1 PE=1 SV=3	-1.023	0.661	18738560	18332908
PRUNE_MOUSE	Protein prune homolog OS=Mus musculus GN=Prune PE=2 SV=1	-1.024	0.706	1539528	1.45734e+06
1433G_MOUSE	14-3-3 protein gamma - Mus musculus (Mouse)	-1.024	0.88	7.11269e+06	7.10824e+06
GSTO1_MOUSE	Glutathione S-transferase omega-1 OS=Mus musculus GN=Gsto1 PE=2 SV=2	-1.025	0.627	4102127	4168704
PWP1_MOUSE	Periodic tryptophan protein 1 homolog OS=Mus musculus GN=Pwp1 PE=1 SV=1	-1.025	0.78	843587	823262
TBA4A_MOUSE	Tubulin alpha-4A chain OS=Mus musculus GN=Tuba4a PE=1 SV=1	-1.025	0.484	15603859	15424382
UFC1_MOUSE	Ubiquitin-fold modifier-conjugating enzyme 1 OS=Mus musculus GN=Ufc1 PE=2 SV=1	-1.025	0.789	2.76807e+06	2.7038e+06
LYPA1_MOUSE	Acyl-protein thioesterase 1 OS=Mus musculus GN=Lypla1 PE=1 SV=1	-1.025	0.34	9468557	9320767
RBM12_MOUSE	RNA-binding protein 12 OS=Mus musculus GN=Rbm12 PE=1 SV=3	-1.025	0.48	5.78801e+06	5.59747e+06
KPCD_MOUSE	Isoform 2 of Protein kinase C delta type OS=Mus musculus GN=Prkcd	-1.025	0.564	1.98733e+06	1.95058e+06
PCP_MOUSE	Lysosomal Pro-X carboxypeptidase OS=Mus musculus GN=Prcp PE=2 SV=2	-1.026	0.836	277302	270403
CASP2_MOUSE	Caspase-2 OS=Mus musculus GN=Casp2 PE=1 SV=5	-1.026	0.887	951041	952243
STIP1_MOUSE	Stress-induced-phosphoprotein 1 OS=Mus musculus GN=Stip1 PE=1 SV=1	-1.026	0.624	1.41937e+06	1.35329e+06
UAP1L_MOUSE	UDP-N-acetylhexosamine pyrophosphorylase-like protein 1 OS=Mus musculus GN=Uap1l1 PE=2 SV=1	-1.027	0.647	2.77915e+06	2.63827e+06
ANXA5_MOUSE	Annexin A5 OS=Mus musculus GN=Anxa5 PE=1 SV=1	-1.027	0.669	2.11326e+06	2.05248e+06
ADH1_MOUSE	Alcohol dehydrogenase 1 OS=Mus musculus GN=Adh1 PE=2 SV=2	-1.027	0.623	18453184	17971134
ATX10_MOUSE	Ataxin-10 OS=Mus musculus GN=Atxn10 PE=1 SV=2	-1.027	0.398	1.87892e+06	1.84467e+06
1433B_MOUSE	14-3-3 protein beta/alpha OS=Mus musculus GN=Ywhab PE=1 SV=3	-1.027	0.747	11377775	11176392
DDI2_MOUSE	Protein DDI1 homolog 2 OS=Mus musculus GN=Ddi2 PE=1 SV=1	-1.027	0.813	851027	827480
DAPP1_MOUSE	Dual adapter for phosphotyrosine and 3-phosphotyrosine and 3-phosphoinositide OS=Mus musculus GN=Dapp1 PE=1 SV=1	-1.027	0.828	911898	887666
1433T_MOUSE	14-3-3 protein theta OS=Mus musculus GN=Ywhaq PE=1 SV=1	-1.029	0.454	3.73187e+06	3.6292e+06
CDC37_MOUSE	Hsp90 co-chaperone Cdc37 OS=Mus musculus GN=Cdc37 PE=2 SV=1	-1.029	0.568	3.26235e+06	3.21265e+06
PDLI5_MOUSE	PDZ and LIM domain protein 5 OS=Mus musculus GN=Pdlim5 PE=1 SV=3	-1.03	0.107	11943644	11547447
ACL6A_MOUSE	Actin-like protein 6A OS=Mus musculus GN=Actl6a PE=1 SV=2	-1.031	0.588	2.89795e+06	2.92169e+06
AN32A_MOUSE	Acidic leucine-rich nuclear phosphoprotein 32 family member A OS=Mus musculus GN=Anp32a PE=1 SV=1	-1.031	0.6	3.15099e+06	3.06914e+06
SMAP2_MOUSE	Stromal membrane-associated protein 2 OS=Mus musculus GN=Smap2 PE=1 SV=1	-1.031	0.502	3385124	3.17492e+06
ARSB_MOUSE	Arylsulfatase B OS=Mus musculus GN=Arsb PE=2 SV=3	-1.032	0.283	2.88264e+06	2791913
HPBP1_MOUSE	Hsp70-binding protein 1 OS=Mus musculus GN=Hspbp1 PE=2 SV=1	-1.033	0.643	1.40632e+06	1.36163e+06
TBB2C_MOUSE	Tubulin beta-2C chain OS=Mus musculus GN=Tubb2c PE=1 SV=1	-1.033	0.126	17558124	17043060
HSP74_MOUSE	Heat shock 70 kDa protein 4 OS=Mus musculus GN=Hspa4 PE=1 SV=1	-1.033	0.721	1888457	1.74612e+06
LGUL_MOUSE	Lactoylglutathione lyase OS=Mus musculus GN=Glo1 PE=1 SV=3	-1.033	0.216	15402592	15015017
MT1_MOUSE	Metallothionein-1 OS=Mus musculus GN=Mt1 PE=1 SV=1	-1.033	0.527	3981845	3855182
OSGEP_MOUSE	Probable O-sialoglycoprotein endopeptidase OS=Mus musculus GN=Osgep PE=2 SV=2	-1.033	0.561	374011	361867
UBC_MOUSE	Polyubiquitin-B OS=Mus musculus GN=Ubb PE=1 SV=1	-1.033	0.081	14107094	13591852
NAA50_MOUSE	Isoform 3 of N-alpha-acetyltransferase 50, NatE catalytic subunit OS=Mus musculus GN=Naa50	-1.034	0.562	720943	695405
PUF60_MOUSE	Isoform 2 of Poly(U)-binding-splicing factor PUF60 OS=Mus musculus GN=Puf60	-1.034	0.829	987866	1.02422e+06
PPM1A_MOUSE	Protein phosphatase 1A OS=Mus musculus GN=Ppm1a PE=1 SV=1	-1.035	0.578	2680777	2.58881e+06
TCTP_MOUSE	Translationally-controlled tumor protein OS=Mus musculus GN=Tpt1 PE=1 SV=1	-1.035	0.629	3.51659e+06	3533833
ACTN4_MOUSE	Alpha-actinin-4 OS=Mus musculus GN=Actn4 PE=1 SV=1	-1.035	0.563	1581776	1.49048e+06
NAAA_MOUSE	N-acylethanolamine-hydrolyzing acid amidase OS=Mus musculus GN=Naaa PE=2 SV=2	-1.037	0.756	1.21181e+06	1.17908e+06
SPEE_MOUSE	Spermidine synthase OS=Mus musculus GN=Srm PE=2 SV=1	-1.038	0.077	17913690	17243248
TPIS_MOUSE	Triosephosphate isomerase OS=Mus musculus GN=Tpi1 PE=1 SV=3	-1.038	0.081	25848822	25022258
QOR_MOUSE	Quinone oxidoreductase OS=Mus musculus GN=Cryz PE=2 SV=1	-1.039	0.691	775640	754225
DYR_MOUSE	Dihydrofolate reductase OS=Mus musculus GN=Dhfr PE=1 SV=3	-1.04	0.624	1.3949e+06	1357750
MTAP_MOUSE	S-methyl-5'-thioadenosine phosphorylase OS=Mus musculus GN=Mtap PE=2 SV=1	-1.041	0.561	2.61058e+06	2477672
CF115_MOUSE	Costars family protein C6orf115 homolog OS=Mus musculus PE=2 SV=1	-1.041	0.428	7.01723e+06	6.74161e+06
PMVK_MOUSE	Phosphomevalonate kinase OS=Mus musculus GN=Pmvk PE=2 SV=3	-1.041	0.783	1.43213e+06	1.37706e+06
AMPM2_MOUSE	Methionine aminopeptidase 2 OS=Mus musculus GN=Metap2 PE=1 SV=1	-1.042	0.544	1.94302e+06	1.76511e+06
AHSA1_MOUSE	Activator of 90 kDa heat shock protein ATPase homolog 1 OS=Mus musculus GN=Ahsa1 PE=2 SV=2	-1.043	0.107	3.39788e+06	3.27488e+06
IMPA1_MOUSE	Inositol monophosphatase 1 OS=Mus musculus GN=Impa1 PE=1 SV=1	-1.043	0.145	11133878	10460216
NPC2_MOUSE	Epididymal secretory protein E1 OS=Mus musculus GN=Npc2 PE=2 SV=1	-1.043	0.283	7.03132e+06	6.76598e+06
SERA_MOUSE	D-3-phosphoglycerate dehydrogenase OS=Mus musculus GN=Phgdh PE=1 SV=3	-1.043	0.056	11450648	10796870
NPM_MOUSE	Nucleophosmin OS=Mus musculus GN=Npm1 PE=1 SV=1	-1.044	0.537	2.69712e+06	2651886
PAG15_MOUSE	Group XV phospholipase A2 OS=Mus musculus GN=Pla2g15 PE=1 SV=1	-1.044	0.412	1.61797e+06	1524437
PEX7_MOUSE	Peroxisomal targeting signal 2 receptor OS=Mus musculus GN=Pex7 PE=2 SV=1	-1.045	0.771	696755	666728
UBQL1_MOUSE	Ubiquilin-1 OS=Mus musculus GN=Ubqln1 PE=1 SV=1	-1.045	0.25	7.93756e+06	7440346
PGM2L_MOUSE	Glucose 1,6-bisphosphate synthase OS=Mus musculus GN=Pgm2l1 PE=1 SV=1	-1.046	0.376	849949	817305
ARI2_MOUSE	E3 ubiquitin-protein ligase ARIH2 OS=Mus musculus GN=Arih2 PE=2 SV=1	-1.047	0.587	1.19895e+06	1.14424e+06
CLIC4_MOUSE	Chloride intracellular channel protein 4 OS=Mus musculus GN=Clic4 PE=1 SV=3	-1.047	0.538	1.67505e+06	1.58161e+06
6PGL_MOUSE	6-phosphogluconolactonase OS=Mus musculus GN=Pgls PE=2 SV=1	-1.047	0.111	4719096	4551672
PCID2_MOUSE	PCI domain-containing protein 2 OS=Mus musculus GN=Pcid2 PE=2 SV=1	-1.048	0.853	847814	822939
ZYX_MOUSE	Zyxin OS=Mus musculus GN=Zyx PE=1 SV=1	-1.048	0.17	12831303	12224814
HGS_MOUSE	Hepatocyte growth factor-regulated tyrosine kinase substrate OS=Mus musculus GN=Hgs PE=1 SV=2	-1.048	0.216	4.18902e+06	3.93255e+06
GANAB_MOUSE	Isoform 2 of Neutral alpha-glucosidase AB OS=Mus musculus GN=Ganab	-1.048	0.402	3939708	3.82812e+06
WDR12_MOUSE	Ribosome biogenesis protein WDR12 OS=Mus musculus GN=Wdr12 PE=2 SV=1	-1.049	0.376	4465428	4511975
S10A4_MOUSE	Protein S100-A4 OS=Mus musculus GN=S100a4 PE=1 SV=1	-1.049	0.489	2.24937e+06	2.32572e+06
TALDO_MOUSE	Transaldolase OS=Mus musculus GN=Taldo1 PE=1 SV=2	-1.05	0.042	7686637	7417645
VPS29_MOUSE	Vacuolar protein sorting-associated protein 29 OS=Mus musculus GN=Vps29 PE=1 SV=1	-1.051	0.549	3480303	3.32534e+06
CASP6_MOUSE	Caspase-6 OS=Mus musculus GN=Casp6 PE=2 SV=1	-1.051	0.701	3.35006e+06	2.71583e+06
SELH_MOUSE	Selenoprotein H OS=Mus musculus GN=Selh PE=2 SV=2	-1.051	0.34	2.35274e+06	2238072
PDLI1_MOUSE	PDZ and LIM domain protein 1 OS=Mus musculus GN=Pdlim1 PE=2 SV=4	-1.051	0.325	2.45469e+06	2.33478e+06
TSSC1_MOUSE	Protein TSSC1 OS=Mus musculus GN=Tssc1 PE=1 SV=1	-1.052	0.411	1.68712e+06	1598438
CD123_MOUSE	Cell division cycle protein 123 homolog OS=Mus musculus GN=Cdc123 PE=2 SV=2	-1.054	0.386	1.73012e+06	1.59027e+06
AL9A1_MOUSE	4-trimethylaminobutyraldehyde dehydrogenase OS=Mus musculus GN=Aldh9a1 PE=1 SV=1	-1.054	0.209	5071258	4.72729e+06
OSBL2_MOUSE	Oxysterol-binding protein-related protein 2 OS=Mus musculus GN=Osbpl2 PE=2 SV=1	-1.054	0.817	564998	537057
ATBD4_MOUSE	Isoform 2 of ATP-binding domain-containing protein 4 OS=Mus musculus GN=Atpbd4	-1.054	0.435	1.16007e+06	1100902
GDIB_MOUSE	Rab GDP dissociation inhibitor beta OS=Mus musculus GN=Gdi2 PE=1 SV=1	-1.054	0.349	3849789	3.73354e+06
AMPB_MOUSE	Aminopeptidase B OS=Mus musculus GN=Rnpep PE=2 SV=1	-1.055	0.239	1800645	1.72413e+06
FHL3_MOUSE	Four and a half LIM domains protein 3 OS=Mus musculus GN=Fhl3 PE=2 SV=1	-1.055	0.152	5.41505e+06	5.37609e+06
NMT2_MOUSE	Glycylpeptide N-tetradecanoyltransferase 2 OS=Mus musculus GN=Nmt2 PE=1 SV=1	-1.056	0.672	1.64117e+06	1.55586e+06
PP1B_MOUSE	Serine/threonine-protein phosphatase PP1-beta catalytic subunit OS=Mus musculus GN=Ppp1cb PE=1 SV=3	-1.056	0.0006354	3.57164e+06	3.42838e+06
ESTD_MOUSE	S-formylglutathione hydrolase OS=Mus musculus GN=Esd PE=2 SV=1	-1.056	0.136	8.17155e+06	7.85259e+06
PCBP2_MOUSE	Poly(rC)-binding protein 2 OS=Mus musculus GN=Pcbp2 PE=1 SV=1	-1.056	0.334	4.94965e+06	4.72982e+06
MAPK2_MOUSE	MAP kinase-activated protein kinase 2 OS=Mus musculus GN=Mapkapk2 PE=1 SV=2	-1.056	0.721	1.41308e+06	1.3215e+06
SERC_MOUSE	Phosphoserine aminotransferase OS=Mus musculus GN=Psat1 PE=1 SV=1	-1.056	0.036	6583455	6.24682e+06
OSTF1_MOUSE	Osteoclast-stimulating factor 1 OS=Mus musculus GN=Ostf1 PE=1 SV=2	-1.057	0.007	2.53466e+06	2.38309e+06
UBE2K_MOUSE	Ubiquitin-conjugating enzyme E2 K OS=Mus musculus GN=Ube2k PE=1 SV=3	-1.058	0.183	3.43242e+06	3.27881e+06
ZPR1_MOUSE	Zinc finger protein ZPR1 OS=Mus musculus GN=Znf259 PE=1 SV=1	-1.059	0.443	2.49061e+06	2.19697e+06
CSK21_MOUSE	Casein kinase II subunit alpha OS=Mus musculus GN=Csnk2a1 PE=2 SV=1	-1.059	0.132	6.58945e+06	6235640
YTHD1_MOUSE	YTH domain family protein 1 OS=Mus musculus GN=Ythdf1 PE=2 SV=1	-1.06	0.154	1.11238e+06	1.05482e+06
FKBP4_MOUSE	Peptidyl-prolyl cis-trans isomerase FKBP4 OS=Mus musculus GN=Fkbp4 PE=1 SV=5	-1.06	0.651	5.12092e+06	4616614
TXNL1_MOUSE	Thioredoxin-like protein 1 OS=Mus musculus GN=Txnl1 PE=1 SV=3	-1.06	0.087	7499468	7.05074e+06
5NT3_MOUSE	Cytosolic 5'-nucleotidase 3 OS=Mus musculus GN=Nt5c3 PE=1 SV=4	-1.061	0.13	3.95111e+06	3.642e+06
MK14_MOUSE	Isoform 2 of Mitogen-activated protein kinase 14 OS=Mus musculus GN=Mapk14	-1.062	0.638	1.11263e+06	1048813
RAB10_MOUSE	Ras-related protein Rab-10 OS=Mus musculus GN=Rab10 PE=1 SV=1	-1.062	0.387	560316	526510
TBA8_MOUSE	Tubulin alpha-8 chain OS=Mus musculus GN=Tuba8 PE=1 SV=1	-1.062	0.09	4.4877e+06	4.17577e+06
ASGL1_MOUSE	L-asparaginase OS=Mus musculus GN=Asrgl1 PE=1 SV=1	-1.062	0.39	1.5135e+06	1.4245e+06
NQO2_MOUSE	Ribosyldihydronicotinamide dehydrogenase [quinone] OS=Mus musculus GN=Nqo2 PE=2 SV=3	-1.064	0.265	924581	863241
ARF5_MOUSE	ADP-ribosylation factor 5 OS=Mus musculus GN=Arf5 PE=2 SV=2	-1.064	0.078	7126038	6.8402e+06
RD23B_MOUSE	UV excision repair protein RAD23 homolog B OS=Mus musculus GN=Rad23b PE=1 SV=1	-1.064	0.102	10677628	10205530
PLSL_MOUSE	Plastin-2 OS=Mus musculus GN=Lcp1 PE=1 SV=4	-1.064	0.035	7.92803e+06	7539501
SRSF4_MOUSE	Serine/arginine-rich splicing factor 4 OS=Mus musculus GN=Srsf4 PE=2 SV=1	-1.064	0.361	2.5431e+06	2.38817e+06
UBXN7_MOUSE	UBX domain-containing protein 7 OS=Mus musculus GN=Ubxn7 PE=1 SV=2	-1.065	0.623	895607	841426
EMAL4_MOUSE	Isoform 2 of Echinoderm microtubule-associated protein-like 4 OS=Mus musculus GN=Eml4	-1.065	0.042	9435440	8862100
CX4NB_MOUSE	Neighbor of COX4 OS=Mus musculus GN=Cox4nb PE=1 SV=1	-1.065	0.371	1.91335e+06	1.80513e+06
GALK1_MOUSE	Galactokinase OS=Mus musculus GN=Galk1 PE=2 SV=1	-1.065	0.372	4.40496e+06	4137504
VAV_MOUSE	Proto-oncogene vav OS=Mus musculus GN=Vav1 PE=1 SV=1	-1.065	0.303	1.22216e+06	1.21689e+06
SARM1_MOUSE	Isoform 2 of Sterile alpha and TIR motif-containing protein 1 OS=Mus musculus GN=Sarm1	-1.066	0.227	5918277	5257985
TES_MOUSE	Testin OS=Mus musculus GN=Tes PE=2 SV=1	-1.067	0.116	3.75052e+06	3503121
ANX11_MOUSE	Annexin A11 OS=Mus musculus GN=Anxa11 PE=1 SV=1	-1.067	0.367	1.42051e+06	1.33055e+06
AP4A_MOUSE	Bis(5'-nucleosyl)-tetraphosphatase [asymmetrical] OS=Mus musculus GN=Nudt2 PE=1 SV=3	-1.067	0.215	2.26427e+06	2110540
GRB2_MOUSE	Growth factor receptor-bound protein 2 OS=Mus musculus GN=Grb2 PE=1 SV=1	-1.068	0.692	7944417	7.08532e+06
GPX1_MOUSE	Glutathione peroxidase 1 OS=Mus musculus GN=Gpx1 PE=1 SV=2	-1.069	0.01	6.5251e+06	6.17776e+06
EF2_MOUSE	Elongation factor 2 OS=Mus musculus GN=Eef2 PE=1 SV=2	-1.069	0.17	8100489	7494426
STAM1_MOUSE	Signal transducing adapter molecule 1 OS=Mus musculus GN=Stam PE=2 SV=3	-1.07	0.492	2.12339e+06	1.98041e+06
PLIN3_MOUSE	Perilipin-3 OS=Mus musculus GN=Plin3 PE=1 SV=1	-1.071	0.752	2.03798e+06	2.15694e+06
UBP5_MOUSE	Ubiquitin carboxyl-terminal hydrolase 5 OS=Mus musculus GN=Usp5 PE=1 SV=1	-1.071	0.143	1.482e+06	1.37536e+06
CC138_MOUSE	Coiled-coil domain-containing protein 138 OS=Mus musculus GN=Ccdc138 PE=2 SV=1	-1.071	0.553	1.0798e+06	1006981
SNX5_MOUSE	Sorting nexin-5 OS=Mus musculus GN=Snx5 PE=1 SV=1	-1.071	0.565	974893	910806
RIR1_MOUSE	Ribonucleoside-diphosphate reductase large subunit OS=Mus musculus GN=Rrm1 PE=1 SV=1	-1.071	0.522	1.69879e+06	1.59042e+06
PPCE_MOUSE	Prolyl endopeptidase OS=Mus musculus GN=Prep PE=2 SV=1	-1.071	0.062	5474331	5087581
PRDX5_MOUSE	Peroxiredoxin-5, mitochondrial OS=Mus musculus GN=Prdx5 PE=1 SV=2	-1.072	0.1	3790696	3.54748e+06
5NT3L_MOUSE	Cytosolic 5'-nucleotidase III-like protein OS=Mus musculus GN=Nt5c3l PE=2 SV=2	-1.073	0.061	2.7371e+06	2.56351e+06
CASP8_MOUSE	Caspase-8 OS=Mus musculus GN=Casp8 PE=1 SV=1	-1.073	0.459	2.10657e+06	1.89233e+06
GUAA_MOUSE	GMP synthase [glutamine-hydrolyzing] OS=Mus musculus GN=Gmps PE=1 SV=2	-1.073	0.145	1.74785e+06	1572235
NCOA2_MOUSE	Nuclear receptor coactivator 2 OS=Mus musculus GN=Ncoa2 PE=1 SV=2	-1.073	0.368	1359453	1.21708e+06
KAPCB_MOUSE	Isoform 2 of cAMP-dependent protein kinase catalytic subunit beta OS=Mus musculus GN=Prkacb	-1.073	0.584	506770	471876
ORN_MOUSE	Oligoribonuclease, mitochondrial OS=Mus musculus GN=Rexo2 PE=1 SV=2	-1.074	0.094	2983768	2.79061e+06
PP4C_MOUSE	Serine/threonine-protein phosphatase 4 catalytic subunit OS=Mus musculus GN=Ppp4c PE=1 SV=2	-1.074	0.094	2778740	2585448
PEPD_MOUSE	Xaa-Pro dipeptidase OS=Mus musculus GN=Pepd PE=2 SV=3	-1.076	0.079	4.14262e+06	3812602
CASP3_MOUSE	Caspase-3 OS=Mus musculus GN=Casp3 PE=1 SV=1	-1.076	0.143	9392443	9255268
FLI1_MOUSE	Friend leukemia integration 1 transcription factor OS=Mus musculus GN=Fli1 PE=1 SV=1	-1.076	0.358	1.07835e+06	996351
SETD7_MOUSE	Histone-lysine N-methyltransferase SETD7 OS=Mus musculus GN=Setd7 PE=2 SV=2	-1.076	0.159	1935133	1.80989e+06
NCF2_MOUSE	Neutrophil cytosol factor 2 OS=Mus musculus GN=Ncf2 PE=2 SV=1	-1.077	0.208	1.62639e+06	1.50957e+06
NU214_MOUSE	Nuclear pore complex protein Nup214 OS=Mus musculus GN=Nup214 PE=1 SV=2	-1.078	0.18	1.15961e+06	1.1009e+06
LKHA4_MOUSE	Leukotriene A-4 hydrolase OS=Mus musculus GN=Lta4h PE=1 SV=3	-1.079	0.097	4827143	4.48459e+06
AEDO_MOUSE	2-aminoethanethiol dioxygenase OS=Mus musculus GN=Ado PE=1 SV=2	-1.079	0.264	1.8032e+06	1.67905e+06
PPP6_MOUSE	Serine/threonine-protein phosphatase 6 catalytic subunit OS=Mus musculus GN=Ppp6c PE=2 SV=1	-1.079	0.369	928005	899254
SAE1_MOUSE	SUMO-activating enzyme subunit 1 OS=Mus musculus GN=Sae1 PE=2 SV=1	-1.08	0.046	2.51652e+06	2.32249e+06
ATF1_MOUSE	Cyclic AMP-dependent transcription factor ATF-1 OS=Mus musculus GN=Atf1 PE=2 SV=1	-1.08	0.807	886334	818970
AK1A1_MOUSE	Alcohol dehydrogenase [NADP+] OS=Mus musculus GN=Akr1a1 PE=1 SV=3	-1.08	0.219	4017012	3.82722e+06
PA1B2_MOUSE	Platelet-activating factor acetylhydrolase IB subunit beta OS=Mus musculus GN=Pafah1b2 PE=1 SV=2	-1.081	0.368	4.04067e+06	3.88736e+06
PP1A_MOUSE	Serine/threonine-protein phosphatase PP1-alpha catalytic subunit OS=Mus musculus GN=Ppp1ca PE=1 SV=1	-1.081	0.339	4.45819e+06	4.20371e+06
VPS4B_MOUSE	Vacuolar protein sorting-associated protein 4B OS=Mus musculus GN=Vps4b PE=1 SV=2	-1.081	0.415	1.42942e+06	1.209e+06
AN32B_MOUSE	Acidic leucine-rich nuclear phosphoprotein 32 family member B OS=Mus musculus GN=Anp32b PE=1 SV=1	-1.082	0.039	4.3109e+06	4.04357e+06
PCY2_MOUSE	Ethanolamine-phosphate cytidylyltransferase OS=Mus musculus GN=Pcyt2 PE=1 SV=1	-1.083	0.513	1849025	1.71151e+06
BACH_MOUSE	Isoform A of Cytosolic acyl coenzyme A thioester hydrolase OS=Mus musculus GN=Acot7	-1.084	0.19	1.76842e+06	1631979
BIEA_MOUSE	Biliverdin reductase A OS=Mus musculus GN=Blvra PE=2 SV=1	-1.084	0.092	1.2796e+06	1.1857e+06
SBP1_MOUSE	Selenium-binding protein 1 OS=Mus musculus GN=Selenbp1 PE=1 SV=2	-1.084	0.141	3.41773e+06	3180253
MYG1_MOUSE	UPF0160 protein MYG1, mitochondrial OS=Mus musculus GN=Myg1 PE=2 SV=1	-1.084	0.449	1762060	1.60504e+06
RCC2_MOUSE	Protein RCC2 OS=Mus musculus GN=Rcc2 PE=2 SV=1	-1.084	0.385	752107	693662
PDC6I_MOUSE	Programmed cell death 6-interacting protein OS=Mus musculus GN=Pdcd6ip PE=1 SV=2	-1.084	0.013	3.01339e+06	2.8275e+06
PRPS2_MOUSE	Ribose-phosphate pyrophosphokinase 2 OS=Mus musculus GN=Prps2 PE=1 SV=4	-1.085	0.065	7593648	7036616
SMAP_MOUSE	Small acidic protein OS=Mus musculus GN=Smap PE=1 SV=1	-1.085	0.239	2.63309e+06	2.43449e+06
CRLF3_MOUSE	Cytokine receptor-like factor 3 OS=Mus musculus GN=Crlf3 PE=2 SV=1	-1.085	0.238	1.30236e+06	1.19991e+06
TOPK_MOUSE	Lymphokine-activated killer T-cell-originated protein kinase OS=Mus musculus GN=Pbk PE=2 SV=1	-1.087	0.163	3.68355e+06	3.36933e+06
MSTO1_MOUSE	Protein misato homolog 1 OS=Mus musculus GN=Msto1 PE=2 SV=1	-1.087	0.346	809627	698400
PUR9_MOUSE	Bifunctional purine biosynthesis protein PURH OS=Mus musculus GN=Atic PE=1 SV=2	-1.088	0.688	2.72263e+06	3.08853e+06
DRG2_MOUSE	Developmentally-regulated GTP-binding protein 2 OS=Mus musculus GN=Drg2 PE=1 SV=1	-1.088	0.037	1.80278e+06	1.66728e+06
FTO_MOUSE	Isoform 2 of Alpha-ketoglutarate-dependent dioxygenase FTO OS=Mus musculus GN=Fto	-1.088	0.103	567127	521782
LSM2_MOUSE	U6 snRNA-associated Sm-like protein LSm2 OS=Mus musculus GN=Lsm2 PE=2 SV=1	-1.088	0.432	1.29765e+06	1.21665e+06
GGH_MOUSE	Gamma-glutamyl hydrolase OS=Mus musculus GN=Ggh PE=1 SV=1	-1.089	0.496	1.37666e+06	1.25128e+06
TIF1B_MOUSE	Transcription intermediary factor 1-beta OS=Mus musculus GN=Trim28 PE=1 SV=3	-1.09	0.163	2.43449e+06	2.28801e+06
HS90B_MOUSE	Heat shock protein HSP 90-beta OS=Mus musculus GN=Hsp90ab1 PE=1 SV=2	-1.091	0.19	11989949	11124074
ENOA_MOUSE	Alpha-enolase OS=Mus musculus GN=Eno1 PE=1 SV=3	-1.091	1.688e-06	36012700	33323622
CE048_MOUSE	Uncharacterized protein C5orf48 homolog OS=Mus musculus PE=2 SV=2	-1.091	0.035	13377456	12249028
TYSY_MOUSE	Thymidylate synthase OS=Mus musculus GN=Tyms PE=1 SV=1	-1.092	0.014	6401574	5838037
PLBL2_MOUSE	Putative phospholipase B-like 2 OS=Mus musculus GN=Plbd2 PE=1 SV=2	-1.093	0.000312	3455139	3.16028e+06
AGM1_MOUSE	Phosphoacetylglucosamine mutase OS=Mus musculus GN=Pgm3 PE=1 SV=1	-1.093	0.323	2.22378e+06	2.03822e+06
THOP1_MOUSE	Thimet oligopeptidase OS=Mus musculus GN=Thop1 PE=1 SV=1	-1.093	0.008	3.87941e+06	3520459
RBM26_MOUSE	Isoform 2 of RNA-binding protein 26 OS=Mus musculus GN=Rbm26	-1.094	0.006	1.23258e+06	1.12551e+06
ADA_MOUSE	Adenosine deaminase OS=Mus musculus GN=Ada PE=1 SV=3	-1.095	0.26	3329610	2.9551e+06
DNM1L_MOUSE	Isoform 2 of Dynamin-1-like protein OS=Mus musculus GN=Dnm1l	-1.095	0.617	310745	283560
UBQL2_MOUSE	Ubiquilin-2 OS=Mus musculus GN=Ubqln2 PE=1 SV=1	-1.095	0.007	12518591	11515144
GAB2_MOUSE	GRB2-associated-binding protein 2 OS=Mus musculus GN=Gab2 PE=1 SV=2	-1.096	0.439	768746	764032
PNPH_MOUSE	Purine nucleoside phosphorylase OS=Mus musculus GN=Pnp PE=1 SV=2	-1.097	0.049	6750532	6.13845e+06
PIPNA_MOUSE	Phosphatidylinositol transfer protein alpha isoform OS=Mus musculus GN=Pitpna PE=1 SV=2	-1.097	0.037	3.26469e+06	2.97611e+06
PRDX1_MOUSE	Peroxiredoxin-1 OS=Mus musculus GN=Prdx1 PE=1 SV=1	-1.098	0.029	6624746	6029777
ANR10_MOUSE	Ankyrin repeat domain-containing protein 10 OS=Mus musculus GN=Ankrd10 PE=2 SV=1	-1.098	0.341	2.91296e+06	2.65478e+06
TS101_MOUSE	Tumor susceptibility gene 101 protein OS=Mus musculus GN=Tsg101 PE=1 SV=2	-1.099	0.162	2582423	2484605
GPX42_MOUSE	Isoform Cytoplasmic of Phospholipid hydroperoxide glutathione peroxidase, mitochondrial OS=Mus musculus GN=Gpx4	-1.099	0.008	4344554	3.98864e+06
SMUF1_MOUSE	E3 ubiquitin-protein ligase SMURF1 OS=Mus musculus GN=Smurf1 PE=1 SV=2	-1.1	0.013	6.61196e+06	6014294
PYR5_MOUSE	Uridine 5'-monophosphate synthase OS=Mus musculus GN=Umps PE=2 SV=3	-1.1	0.01	2.57614e+06	2365394
GDIR2_MOUSE	Rho GDP-dissociation inhibitor 2 OS=Mus musculus GN=Arhgdib PE=1 SV=3	-1.1	0.179	3.33439e+06	3035952
NASP_MOUSE	Nuclear autoantigenic sperm protein OS=Mus musculus GN=Nasp PE=1 SV=2	-1.101	0.046	3.08466e+06	2.83663e+06
RRAGD_MOUSE	Ras-related GTP-binding protein C OS=Mus musculus GN=Rragc PE=2 SV=1	-1.101	0.191	1.54557e+06	1.40383e+06
SRA1_MOUSE	Steroid receptor RNA activator 1 OS=Mus musculus GN=Sra1 PE=1 SV=2	-1.102	0.095	1.99684e+06	1.80204e+06
NDRG3_MOUSE	Protein NDRG3 OS=Mus musculus GN=Ndrg3 PE=1 SV=1	-1.102	0.023	4333952	3.96945e+06
TRXR1_MOUSE	Thioredoxin reductase 1, cytoplasmic OS=Mus musculus GN=Txnrd1 PE=1 SV=3	-1.102	2.788e-05	10410452	9508366
PYRG1_MOUSE	CTP synthase 1 OS=Mus musculus GN=Ctps PE=1 SV=2	-1.102	0.037	1.78058e+06	1.61572e+06
STXB2_MOUSE	Syntaxin-binding protein 2 OS=Mus musculus GN=Stxbp2 PE=2 SV=1	-1.103	0.028	2115580	1857765
MOB2_MOUSE	Mps one binder kinase activator-like 2 OS=Mus musculus GN=Mob2 PE=2 SV=1	-1.105	0.238	913975	827301
PARK7_MOUSE	Protein DJ-1 OS=Mus musculus GN=Park7 PE=1 SV=1	-1.105	0.04	2.66766e+06	2351801
ADHX_MOUSE	Alcohol dehydrogenase class-3 OS=Mus musculus GN=Adh5 PE=1 SV=3	-1.105	0.038	5687849	5270814
PGM2_MOUSE	Phosphoglucomutase-2 OS=Mus musculus GN=Pgm2 PE=1 SV=1	-1.108	0.006	2.93701e+06	2.65695e+06
DD19A_MOUSE	ATP-dependent RNA helicase DDX19A OS=Mus musculus GN=Ddx19a PE=1 SV=1	-1.109	0.343	687898	620238
RBM8A_MOUSE	RNA-binding protein 8A OS=Mus musculus GN=Rbm8a PE=1 SV=3	-1.11	0.36	2.84227e+06	2387973
FA49B_MOUSE	Protein FAM49B OS=Mus musculus GN=Fam49b PE=2 SV=1	-1.11	0.107	2.15524e+06	2.16012e+06
HS90A_MOUSE	Heat shock protein HSP 90-alpha OS=Mus musculus GN=Hsp90aa1 PE=1 SV=4	-1.11	0.011	8.10166e+06	7.33305e+06
CA163_MOUSE	Hcp beta-lactamase-like protein C1orf163 homolog OS=Mus musculus PE=1 SV=1	-1.11	0.219	452819	404429
MK01_MOUSE	Mitogen-activated protein kinase 1 OS=Mus musculus GN=Mapk1 PE=1 SV=3	-1.111	0.148	1.87764e+06	1.77286e+06
ZWINT_MOUSE	ZW10 interactor OS=Mus musculus GN=Zwint PE=2 SV=1	-1.111	0.153	1.63602e+06	1.47584e+06
PDXK_MOUSE	Pyridoxal kinase OS=Mus musculus GN=Pdxk PE=1 SV=1	-1.111	0.025	3.43983e+06	3006430
ENOPH_MOUSE	Enolase-phosphatase E1 OS=Mus musculus GN=Enoph1 PE=2 SV=1	-1.111	0.547	739136	616885
SPAG5_MOUSE	Sperm-associated antigen 5 OS=Mus musculus GN=Spag5 PE=1 SV=1	-1.111	0.741	5.3447e+06	4799710
IMPA2_MOUSE	Inositol monophosphatase 2 OS=Mus musculus GN=Impa2 PE=1 SV=1	-1.112	0.114	3059110	2794511
TNPO1_MOUSE	Transportin-1 OS=Mus musculus GN=Tnpo1 PE=1 SV=2	-1.112	0.206	1.53727e+06	1.34984e+06
DYST_MOUSE	Isoform 3 of Dystonin OS=Mus musculus GN=Dst	-1.113	0.048	20714744	18615928
CCS_MOUSE	Copper chaperone for superoxide dismutase OS=Mus musculus GN=Ccs PE=1 SV=1	-1.113	0.011	5140921	4618366
SHLB1_MOUSE	Endophilin-B1 OS=Mus musculus GN=Sh3glb1 PE=1 SV=1	-1.114	0.628	230911	207996
NANP_MOUSE	N-acylneuraminate-9-phosphatase OS=Mus musculus GN=Nanp PE=1 SV=1	-1.114	0.02	1.94874e+06	1.75099e+06
IMA3_MOUSE	Importin subunit alpha-3 OS=Mus musculus GN=Kpna3 PE=1 SV=1	-1.114	0.352	1.02587e+06	921259
XPO1_MOUSE	Exportin-1 OS=Mus musculus GN=Xpo1 PE=1 SV=1	-1.115	0.08	2116957	1.98662e+06
PKHA2_MOUSE	Pleckstrin homology domain-containing family A member 2 OS=Mus musculus GN=Plekha2 PE=1 SV=1	-1.115	0.011	2.16018e+06	1.91592e+06
PHP14_MOUSE	14 kDa phosphohistidine phosphatase OS=Mus musculus GN=Phpt1 PE=1 SV=1	-1.116	0.042	4970132	4.42807e+06
PXDC2_MOUSE	Plexin domain-containing protein 2 OS=Mus musculus GN=Plxdc2 PE=1 SV=1	-1.116	0.692	3.18918e+06	2.49086e+06
NEUL_MOUSE	Neurolysin, mitochondrial OS=Mus musculus GN=Nln PE=2 SV=1	-1.116	0.056	1.40847e+06	1.26294e+06
DBR1_MOUSE	Lariat debranching enzyme OS=Mus musculus GN=Dbr1 PE=1 SV=2	-1.116	0.149	1.0529e+06	916352
UAP1_MOUSE	Isoform AGX1 of UDP-N-acetylhexosamine pyrophosphorylase OS=Mus musculus GN=Uap1	-1.117	0.557	184670	165258
XPO2_MOUSE	Exportin-2 OS=Mus musculus GN=Cse1l PE=2 SV=1	-1.117	0.073	1.41521e+06	1.26625e+06
ANXA2_MOUSE	Annexin A2 OS=Mus musculus GN=Anxa2 PE=1 SV=2	-1.118	0.056	3.52765e+06	3177365
CF211_MOUSE	Isoform 2 of UPF0364 protein C6orf211 homolog OS=Mus musculus	-1.119	0.091	1.87754e+06	1.67897e+06
ALDOA_MOUSE	Fructose-bisphosphate aldolase A OS=Mus musculus GN=Aldoa PE=1 SV=2	-1.119	5.996e-05	9107113	8025906
STA5A_MOUSE	Signal transducer and activator of transcription 5A OS=Mus musculus GN=Stat5a PE=1 SV=1	-1.121	0.604	842339	746661
MOL1A_MOUSE	Mps one binder kinase activator-like 1B OS=Mus musculus GN=Mobkl1b PE=1 SV=3	-1.124	0.0001997	2.64066e+06	2.35063e+06
TBCEL_MOUSE	Tubulin-specific chaperone cofactor E-like protein OS=Mus musculus GN=Tbcel PE=1 SV=1	-1.124	0.35	543848	447412
PA24A_MOUSE	Cytosolic phospholipase A2 OS=Mus musculus GN=Pla2g4a PE=1 SV=1	-1.124	0.063	594906	523539
NEDD4_MOUSE	E3 ubiquitin-protein ligase NEDD4 OS=Mus musculus GN=Nedd4 PE=1 SV=3	-1.125	0.026	2.56597e+06	2308748
HTF4_MOUSE	Transcription factor 12 OS=Mus musculus GN=Tcf12 PE=1 SV=1	-1.125	0.513	1.67929e+06	1.4932e+06
ASNS_MOUSE	Asparagine synthetase [glutamine-hydrolyzing] OS=Mus musculus GN=Asns PE=2 SV=3	-1.127	1.704e-05	2.75858e+06	2.47822e+06
RIR2_MOUSE	Ribonucleoside-diphosphate reductase subunit M2 OS=Mus musculus GN=Rrm2 PE=1 SV=1	-1.127	0.066	1.36059e+06	1.22484e+06
GRHPR_MOUSE	Glyoxylate reductase/hydroxypyruvate reductase OS=Mus musculus GN=Grhpr PE=1 SV=1	-1.127	0.051	2.32793e+06	2131218
SLAP2_MOUSE	Src-like-adapter 2 OS=Mus musculus GN=Sla2 PE=1 SV=3	-1.129	0.013	1.24282e+06	1.10819e+06
IPYR_MOUSE	Inorganic pyrophosphatase OS=Mus musculus GN=Ppa1 PE=1 SV=1	-1.129	0.004	6.42714e+06	5788696
DCUP_MOUSE	Uroporphyrinogen decarboxylase OS=Mus musculus GN=Urod PE=1 SV=2	-1.129	0.195	705112	624282
PP2AA_MOUSE	Serine/threonine-protein phosphatase 2A catalytic subunit alpha isoform OS=Mus musculus GN=Ppp2ca PE=1 SV=1	-1.13	0.009	4668590	4.17286e+06
NUP54_MOUSE	Nuclear pore complex protein Nup54 OS=Mus musculus GN=Nup54 PE=1 SV=1	-1.131	0.025	2.11135e+06	1.88535e+06
UBA1_MOUSE	Ubiquitin-like modifier-activating enzyme 1 OS=Mus musculus GN=Uba1 PE=1 SV=1	-1.131	1.728e-05	5.23226e+06	4570082
UB2D2_MOUSE	Ubiquitin-conjugating enzyme E2 D2 OS=Mus musculus GN=Ube2d2 PE=1 SV=1	-1.132	0.38	800423	808610
CO4B_MOUSE	Complement C4-B OS=Mus musculus GN=C4b PE=1 SV=2	-1.132	0.279	1.27423e+06	1.12372e+06
CT027_MOUSE	UPF0687 protein C20orf27 homolog OS=Mus musculus PE=2 SV=3	-1.132	0.022	2.33584e+06	2.06343e+06
NDKB_MOUSE	Nucleoside diphosphate kinase B OS=Mus musculus GN=Nme2 PE=1 SV=1	-1.134	1.06e-05	9741334	8552968
SAR1B_MOUSE	GTP-binding protein SAR1b OS=Mus musculus GN=Sar1b PE=1 SV=1	-1.135	0.19	5268733	4910017
SNX12_MOUSE	Sorting nexin-12 OS=Mus musculus GN=Snx12 PE=2 SV=1	-1.135	0.163	968668	858938
PSA5_MOUSE	Proteasome subunit alpha type-5 OS=Mus musculus GN=Psma5 PE=1 SV=1	-1.137	0.296	1.03705e+06	911622
YKT6_MOUSE	Synaptobrevin homolog YKT6 OS=Mus musculus GN=Ykt6 PE=2 SV=1	-1.137	0.415	1.8315e+06	1.60895e+06
IPO5_MOUSE	Importin-5 OS=Mus musculus GN=Ipo5 PE=1 SV=3	-1.137	0.027	2.42395e+06	2.04093e+06
IGBP1_MOUSE	Immunoglobulin-binding protein 1 OS=Mus musculus GN=Igbp1 PE=2 SV=1	-1.138	0.002	1.28369e+06	1.1485e+06
KPYM_MOUSE	Pyruvate kinase isozymes M1/M2 OS=Mus musculus GN=Pkm2 PE=1 SV=4	-1.139	0.0002461	10184737	9051241
NDKA_MOUSE	Nucleoside diphosphate kinase A OS=Mus musculus GN=Nme1 PE=1 SV=1	-1.139	0.175	3.40847e+06	2883193
PSMD5_MOUSE	26S proteasome non-ATPase regulatory subunit 5 OS=Mus musculus GN=Psmd5 PE=2 SV=4	-1.141	0.185	1.25475e+06	1.06869e+06
SHLB2_MOUSE	Isoform 1 of Endophilin-B2 OS=Mus musculus GN=Sh3glb2	-1.142	0.015	3308733	2.87798e+06
ICLN_MOUSE	Methylosome subunit pICln OS=Mus musculus GN=Clns1a PE=1 SV=1	-1.144	0.003	4123432	3605445
UBP4_MOUSE	Ubiquitin carboxyl-terminal hydrolase 4 OS=Mus musculus GN=Usp4 PE=1 SV=2	-1.144	0.503	878502	717125
PTN23_MOUSE	Tyrosine-protein phosphatase non-receptor type 23 OS=Mus musculus GN=Ptpn23 PE=1 SV=2	-1.144	0.009	3.13588e+06	2.78708e+06
RAC1_MOUSE	Ras-related C3 botulinum toxin substrate 1 OS=Mus musculus GN=Rac1 PE=1 SV=1	-1.144	0.137	3.41125e+06	2.85027e+06
KLDC4_MOUSE	Kelch domain-containing protein 4 OS=Mus musculus GN=Klhdc4 PE=2 SV=2	-1.145	0.96	1.01461e+06	871133
AACS_MOUSE	Acetoacetyl-CoA synthetase OS=Mus musculus GN=Aacs PE=1 SV=1	-1.146	0.002	4996111	4402337
FCL_MOUSE	GDP-L-fucose synthase OS=Mus musculus GN=Tsta3 PE=2 SV=3	-1.146	0.008	4.17065e+06	3637416
RHG01_MOUSE	Rho GTPase-activating protein 1 OS=Mus musculus GN=Arhgap1 PE=1 SV=1	-1.147	0.027	3615404	3.18599e+06
GABP1_MOUSE	Isoform 2 of GA-binding protein subunit beta-1 OS=Mus musculus GN=Gabpb1	-1.149	0.131	1115160	970056
UN13D_MOUSE	Protein unc-13 homolog D OS=Mus musculus GN=Unc13d PE=1 SV=2	-1.15	0.051	1.05212e+06	853706
CHSP1_MOUSE	Calcium-regulated heat stable protein 1 OS=Mus musculus GN=Carhsp1 PE=1 SV=1	-1.154	0.447	799141	692548
S23IP_MOUSE	SEC23-interacting protein OS=Mus musculus GN=Sec23ip PE=1 SV=2	-1.154	0.002	3.03358e+06	2.62453e+06
ACTN1_MOUSE	Alpha-actinin-1 OS=Mus musculus GN=Actn1 PE=2 SV=1	-1.155	0.112	2.2855e+06	2.10908e+06
H2AZ_MOUSE	Histone H2A.V OS=Mus musculus GN=H2afv PE=1 SV=3	-1.156	0.029	2377611	2112587
SYMC_MOUSE	Methionyl-tRNA synthetase, cytoplasmic OS=Mus musculus GN=Mars PE=2 SV=1	-1.156	0.047	1.03011e+06	890737
MTPN_MOUSE	Myotrophin OS=Mus musculus GN=Mtpn PE=1 SV=2	-1.157	0.001	4389497	3.80498e+06
PGAM1_MOUSE	Phosphoglycerate mutase 1 OS=Mus musculus GN=Pgam1 PE=1 SV=3	-1.157	0.001	8.04579e+06	6.9547e+06
TR112_MOUSE	tRNA methyltransferase 112 homolog OS=Mus musculus GN=Trmt112 PE=2 SV=1	-1.157	0.01	2214460	1.91309e+06
RNT2_MOUSE	Ribonuclease T2 OS=Mus musculus GN=Rnaset2 PE=2 SV=1	-1.159	6.932e-06	6.52851e+06	5.63689e+06
HPRT_MOUSE	Hypoxanthine-guanine phosphoribosyltransferase OS=Mus musculus GN=Hprt1 PE=1 SV=3	-1.162	0.003	4560684	4014645
G3P_MOUSE	Glyceraldehyde-3-phosphate dehydrogenase OS=Mus musculus GN=Gapdh PE=1 SV=2	-1.162	8.044e-17	18378340	15993970
LDHA_MOUSE	L-lactate dehydrogenase A chain OS=Mus musculus GN=Ldha PE=1 SV=3	-1.162	2.51e-05	15603573	13498986
LTOR3_MOUSE	Ragulator complex protein LAMTOR3 OS=Mus musculus GN=Lamtor3 PE=1 SV=1	-1.163	0.202	330056	283772
TCPQ_MOUSE	T-complex protein 1 subunit theta OS=Mus musculus GN=Cct8 PE=1 SV=3	-1.163	0.106	1.32959e+06	1212885
ARK72_MOUSE	Aflatoxin B1 aldehyde reductase member 2 OS=Mus musculus GN=Akr7a2 PE=1 SV=2	-1.165	0.085	2.0132e+06	1.72814e+06
PSME1_MOUSE	Proteasome activator complex subunit 1 OS=Mus musculus GN=Psme1 PE=2 SV=2	-1.165	0.091	931903	805552
IF4H_MOUSE	Eukaryotic translation initiation factor 4H OS=Mus musculus GN=Eif4h PE=1 SV=3	-1.166	0.048	2228776	1.4615e+06
G6PI_MOUSE	Glucose-6-phosphate isomerase OS=Mus musculus GN=Gpi PE=1 SV=4	-1.169	5.824e-11	6104405	5237767
GLGB_MOUSE	1,4-alpha-glucan-branching enzyme OS=Mus musculus GN=Gbe1 PE=2 SV=1	-1.169	0.622	386159	331354
TBCC_MOUSE	Tubulin-specific chaperone C OS=Mus musculus GN=Tbcc PE=2 SV=1	-1.17	0.027	638545	551127
HS105_MOUSE	Heat shock protein 105 kDa OS=Mus musculus GN=Hsph1 PE=1 SV=2	-1.17	0.089	1732452	1.53981e+06
LRRK1_MOUSE	Uncharacterized protein KIAA0753 OS=Mus musculus GN=Kiaa0753 PE=2 SV=2	-1.17	0.012	4515115	3.85731e+06
NT5D1_MOUSE	Isoform 2 of 5'-nucleotidase domain-containing protein 1 OS=Mus musculus GN=Nt5dc1	-1.171	0.041	771014	649743
RPIA_MOUSE	Ribose-5-phosphate isomerase OS=Mus musculus GN=Rpia PE=2 SV=2	-1.171	0.024	2.0875e+06	1.75654e+06
NUDT3_MOUSE	Diphosphoinositol polyphosphate phosphohydrolase 1 OS=Mus musculus GN=Nudt3 PE=1 SV=1	-1.171	0.314	6.86631e+06	6232793
ZFN2B_MOUSE	AN1-type zinc finger protein 2B OS=Mus musculus GN=Zfand2b PE=1 SV=1	-1.173	0.05	854021	728321
MINK1_MOUSE	Isoform 2 of Traf2 and NCK-interacting protein kinase OS=Mus musculus GN=Tnik	-1.174	2.089e-08	21856834	18620754
AATC_MOUSE	Aspartate aminotransferase, cytoplasmic OS=Mus musculus GN=Got1 PE=1 SV=2	-1.174	0.061	3.33873e+06	2.92591e+06
VPP2_MOUSE	V-type proton ATPase 116 kDa subunit a isoform 2 OS=Mus musculus GN=Atp6v0a2 PE=1 SV=2	-1.174	0.023	2608434	2.22038e+06
TKT_MOUSE	Transketolase OS=Mus musculus GN=Tkt PE=1 SV=1	-1.175	4.418e-15	14837152	12737044
COX17_MOUSE	Cytochrome c oxidase copper chaperone OS=Mus musculus GN=Cox17 PE=2 SV=2	-1.176	0.204	1.37442e+06	1169240
CDK6_MOUSE	Cyclin-dependent kinase 6 OS=Mus musculus GN=Cdk6 PE=2 SV=2	-1.177	0.003	2.10293e+06	1.78452e+06
I2BPL_MOUSE	Interferon regulatory factor 2-binding protein-like OS=Mus musculus GN=Irf2bpl PE=1 SV=1	-1.177	0.011	518895	444268
ACSA_MOUSE	Acetyl-coenzyme A synthetase, cytoplasmic OS=Mus musculus GN=Acss2 PE=1 SV=1	-1.177	0.012	5116571	4.46495e+06
OLA1_MOUSE	Obg-like ATPase 1 OS=Mus musculus GN=Ola1 PE=1 SV=1	-1.177	9.552e-05	1.85257e+06	1.55257e+06
FGD5_MOUSE	FYVE, RhoGEF and PH domain-containing protein 5 OS=Mus musculus GN=Fgd5 PE=1 SV=2	-1.178	0.006	6.14804e+06	5217565
PGM1_MOUSE	Phosphoglucomutase-1 OS=Mus musculus GN=Pgm1 PE=1 SV=3	-1.178	0.248	841602	642498
NT5C_MOUSE	5'(3')-deoxyribonucleotidase, cytosolic type OS=Mus musculus GN=Nt5c PE=1 SV=1	-1.179	0.009	1368901	1161419
PP1R7_MOUSE	Protein phosphatase 1 regulatory subunit 7 OS=Mus musculus GN=Ppp1r7 PE=1 SV=2	-1.179	0.037	877683	772149
APT_MOUSE	Adenine phosphoribosyltransferase OS=Mus musculus GN=Aprt PE=2 SV=1	-1.181	0.000283	3.92612e+06	3.25201e+06
MGN_MOUSE	Protein mago nashi homolog 1-related OS=Mus musculus GN=Magoh-rs1 PE=2 SV=1	-1.181	0.378	2.01899e+06	1710674
GSHR_MOUSE	Glutathione reductase, mitochondrial OS=Mus musculus GN=Gsr PE=2 SV=3	-1.182	0.0008038	4408639	3.8401e+06
ODO1_MOUSE	Isoform 2 of 2-oxoglutarate dehydrogenase, mitochondrial OS=Mus musculus GN=Ogdh	-1.182	0.025	5.57028e+06	4725675
KAP3_MOUSE	cAMP-dependent protein kinase type II-beta regulatory subunit OS=Mus musculus GN=Prkar2b PE=1 SV=3	-1.186	0.0003363	2.7701e+06	2.35234e+06
GALK2_MOUSE	N-acetylgalactosamine kinase OS=Mus musculus GN=Galk2 PE=1 SV=1	-1.186	4.291e-05	3.7543e+06	3119478
AKT1_MOUSE	RAC-alpha serine/threonine-protein kinase OS=Mus musculus GN=Akt1 PE=1 SV=1	-1.187	0.001	1.7577e+06	1.54284e+06
PCX3_MOUSE	Pecanex-like protein 3 OS=Mus musculus GN=Pcnxl3 PE=1 SV=2	-1.19	0.156	2.15693e+06	1.8121e+06
MAVS_MOUSE	Mitochondrial antiviral-signaling protein OS=Mus musculus GN=Mavs PE=1 SV=1	-1.19	0.046	873144	733411
SAAL1_MOUSE	Protein SAAL1 OS=Mus musculus GN=Saal1 PE=1 SV=1	-1.194	0.346	206185	172695
WDR73_MOUSE	Isoform 2 of WD repeat-containing protein 73 OS=Mus musculus GN=Wdr73	-1.195	0.018	2.2869e+06	1.99485e+06
VPS35_MOUSE	Vacuolar protein sorting-associated protein 35 OS=Mus musculus GN=Vps35 PE=1 SV=1	-1.195	0.196	1.29062e+06	1.17149e+06
UBE2Z_MOUSE	Ubiquitin-conjugating enzyme E2 Z OS=Mus musculus GN=Ube2z PE=1 SV=2	-1.195	0.149	1.54316e+06	1525120
ATN1_MOUSE	Atrophin-1 OS=Mus musculus GN=Atn1 PE=1 SV=1	-1.199	2.576e-06	2.1101e+06	1734160
SYWC_MOUSE	Tryptophanyl-tRNA synthetase, cytoplasmic OS=Mus musculus GN=Wars PE=1 SV=2	-1.2	0.398	722498	602703
IDI1_MOUSE	Isopentenyl-diphosphate Delta-isomerase 1 OS=Mus musculus GN=Idi1 PE=2 SV=1	-1.2	3.194e-11	16901574	14355466
ARNT_MOUSE	Aryl hydrocarbon receptor nuclear translocator OS=Mus musculus GN=Arnt PE=1 SV=2	-1.2	0.077	1.46057e+06	1.3695e+06
IRAK3_MOUSE	Interleukin-1 receptor-associated kinase 3 OS=Mus musculus GN=Irak3 PE=1 SV=2	-1.2	0.042	1.48542e+06	1.23646e+06
REL_MOUSE	Proto-oncogene c-Rel OS=Mus musculus GN=Rel PE=1 SV=2	-1.201	0.048	2.21905e+06	1.91801e+06
ANXA6_MOUSE	Annexin A6 OS=Mus musculus GN=Anxa6 PE=1 SV=2	-1.203	0.004	1.07849e+06	894483
MICA1_MOUSE	NEDD9-interacting protein with calponin homology and LIM domains OS=Mus musculus GN=Mical1 PE=1 SV=1	-1.204	0.002	1.58114e+06	1.27206e+06
ATG3_MOUSE	Ubiquitin-like-conjugating enzyme ATG3 OS=Mus musculus GN=Atg3 PE=1 SV=1	-1.205	0.006	2.34554e+06	1.91164e+06
RIFK_MOUSE	Riboflavin kinase OS=Mus musculus GN=Rfk PE=2 SV=2	-1.206	0.146	378321	313802
NIT2_MOUSE	Omega-amidase NIT2 OS=Mus musculus GN=Nit2 PE=1 SV=1	-1.206	0.01	1.06533e+06	883296
CARM1_MOUSE	Histone-arginine methyltransferase CARM1 OS=Mus musculus GN=Carm1 PE=1 SV=2	-1.206	0.0001483	4282867	3.5288e+06
FNTA_MOUSE	Protein farnesyltransferase/geranylgeranyltransferase type-1 subunit alpha OS=Mus musculus GN=Fnta PE=2 SV=1	-1.207	0.209	264214	218997
FPPS_MOUSE	Farnesyl pyrophosphate synthase OS=Mus musculus GN=Fdps PE=2 SV=1	-1.209	4.777e-10	8921647	7437439
MEF2A_MOUSE	Isoform 2 of Myocyte-specific enhancer factor 2A OS=Mus musculus GN=Mef2a	-1.21	0.049	1.7075e+06	1.5578e+06
EF2K_MOUSE	Eukaryotic elongation factor 2 kinase OS=Mus musculus GN=Eef2k PE=1 SV=1	-1.212	0.04	1.92957e+06	1.57752e+06
HXK2_MOUSE	Hexokinase-2 OS=Mus musculus GN=Hk2 PE=1 SV=1	-1.214	0.082	530910	444958
UBA6_MOUSE	Ubiquitin-like modifier-activating enzyme 6 OS=Mus musculus GN=Uba6 PE=1 SV=1	-1.219	0.018	933962	760371
RRAGA_MOUSE	Ras-related GTP-binding protein A OS=Mus musculus GN=Rraga PE=2 SV=1	-1.219	0.337	203837	158703
RBBP4_MOUSE	Histone-binding protein RBBP4 OS=Mus musculus GN=Rbbp4 PE=1 SV=4	-1.22	0.107	1262470	1.03129e+06
DHX15_MOUSE	Putative pre-mRNA-splicing factor ATP-dependent RNA helicase DHX15 OS=Mus musculus GN=Dhx15 PE=2 SV=2	-1.22	0.081	986559	818569
6PGD_MOUSE	6-phosphogluconate dehydrogenase, decarboxylating OS=Mus musculus GN=Pgd PE=2 SV=3	-1.221	0.002	3.36349e+06	2.84303e+06
ZMIZ1_MOUSE	Zinc finger MIZ domain-containing protein 1 OS=Mus musculus GN=Zmiz1 PE=2 SV=1	-1.221	4.455e-05	2.40247e+06	1.96808e+06
S30BP_MOUSE	SAP30-binding protein OS=Mus musculus GN=Sap30bp PE=2 SV=2	-1.222	0.001	5.62389e+06	4697871
CPNE1_MOUSE	Copine-1 OS=Mus musculus GN=Cpne1 PE=1 SV=1	-1.223	0.076	1860992	1.52165e+06
CPPED_MOUSE	Calcineurin-like phosphoesterase domain-containing protein 1 OS=Mus musculus GN=Cpped1 PE=2 SV=1	-1.223	0.0007674	4942284	4671407
WBP2_MOUSE	WW domain-binding protein 2 OS=Mus musculus GN=Wbp2 PE=1 SV=1	-1.224	0.111	3886565	3549175
OGFR_MOUSE	Opioid growth factor receptor OS=Mus musculus GN=Ogfr PE=2 SV=1	-1.225	0.04	2.14566e+06	1.75729e+06
TPP1_MOUSE	Tripeptidyl-peptidase 1 OS=Mus musculus GN=Tpp1 PE=1 SV=2	-1.225	0.0006221	2856400	2.24381e+06
FXYD5_MOUSE	FXYD domain-containing ion transport regulator 5 OS=Mus musculus GN=Fxyd5 PE=1 SV=3	-1.226	0.006	2.47477e+06	2020526
K2C5_MOUSE	Keratin, type II cytoskeletal 5 OS=Mus musculus GN=Krt5 PE=1 SV=1	-1.226	3.96e-06	20906342	17043828
ANM7_MOUSE	Protein arginine N-methyltransferase 7 OS=Mus musculus GN=Prmt7 PE=1 SV=1	-1.227	0.042	1.64299e+06	1.3389e+06
CNDP2_MOUSE	Cytosolic non-specific dipeptidase OS=Mus musculus GN=Cndp2 PE=1 SV=1	-1.228	0.005	3.23996e+06	2.62506e+06
DPP3_MOUSE	Dipeptidyl peptidase 3 OS=Mus musculus GN=Dpp3 PE=2 SV=1	-1.229	0.053	921835	731602
PSA_MOUSE	Puromycin-sensitive aminopeptidase OS=Mus musculus GN=Npepps PE=1 SV=2	-1.232	0.009	1.21069e+06	997144
CSRP1_MOUSE	Cysteine and glycine-rich protein 1 OS=Mus musculus GN=Csrp1 PE=1 SV=3	-1.233	0.102	1.49244e+06	1.07386e+06
PPT1_MOUSE	Palmitoyl-protein thioesterase 1 OS=Mus musculus GN=Ppt1 PE=2 SV=2	-1.236	0.000218	3.56898e+06	2894947
XPP1_MOUSE	Xaa-Pro aminopeptidase 1 OS=Mus musculus GN=Xpnpep1 PE=2 SV=1	-1.237	5.342e-11	2.84872e+06	2347252
WDR85_MOUSE	WD repeat-containing protein 85 OS=Mus musculus GN=Wdr85 PE=2 SV=1	-1.238	0.004	1.40339e+06	1.11275e+06
CDD_MOUSE	Cytidine deaminase OS=Mus musculus GN=Cda PE=1 SV=2	-1.24	0.103	996789	804128
RSU1_MOUSE	Ras suppressor protein 1 OS=Mus musculus GN=Rsu1 PE=2 SV=3	-1.24	0.03	1.3235e+06	1.10101e+06
PHAR4_MOUSE	Isoform 2 of Phosphatase and actin regulator 4 OS=Mus musculus GN=Phactr4	-1.24	0.061	1.69647e+06	1.38523e+06
MLTK_MOUSE	Isoform 2 of Mitogen-activated protein kinase kinase kinase MLT OS=Mus musculus GN=Mltk	-1.244	0.054	1.28322e+06	1.03144e+06
NRBP_MOUSE	Nuclear receptor-binding protein OS=Mus musculus GN=Nrbp1 PE=1 SV=1	-1.244	0.028	380132	301612
COBA1_MOUSE	Collagen alpha-1(XI) chain OS=Mus musculus GN=Col11a1 PE=1 SV=1	-1.244	0.013	5.59971e+06	4499823
CK054_MOUSE	Ester hydrolase C11orf54 homolog OS=Mus musculus PE=2 SV=1	-1.248	0.283	555736	445372
CLH_MOUSE	Clathrin heavy chain 1 OS=Mus musculus GN=Cltc PE=1 SV=3	-1.248	0.303	833289	668353
CAZA2_MOUSE	F-actin-capping protein subunit alpha-2 OS=Mus musculus GN=Capza2 PE=1 SV=3	-1.249	0.417	682910	542797
CRTC2_MOUSE	CREB-regulated transcription coactivator 2 OS=Mus musculus GN=Crtc2 PE=1 SV=2	-1.249	0.046	1.72481e+06	1.29111e+06
ADSV_MOUSE	Adseverin OS=Mus musculus GN=Scin PE=1 SV=2	-1.249	5.455e-09	3.64307e+06	2923407
MANBA_MOUSE	Beta-mannosidase OS=Mus musculus GN=Manba PE=2 SV=1	-1.252	0.02	558711	446129
CPNE3_MOUSE	Copine-3 OS=Mus musculus GN=Cpne3 PE=1 SV=2	-1.254	0.002	3.75479e+06	3.1052e+06
ZMIZ2_MOUSE	Isoform 2 of Zinc finger MIZ domain-containing protein 2 OS=Mus musculus GN=Zmiz2	-1.256	0.021	3.85701e+06	3.19345e+06
TAB2_MOUSE	TGF-beta-activated kinase 1 and MAP3K7-binding protein 2 OS=Mus musculus GN=Tab2 PE=1 SV=1	-1.257	0.061	2.62599e+06	1920759
MDHC_MOUSE	Malate dehydrogenase, cytoplasmic OS=Mus musculus GN=Mdh1 PE=1 SV=3	-1.259	0.028	3.12209e+06	2707829
CI041_MOUSE	UPF0586 protein C9orf41 homolog OS=Mus musculus PE=2 SV=1	-1.259	0.16	455985	361584
VINC_MOUSE	Vinculin OS=Mus musculus GN=Vcl PE=1 SV=4	-1.262	0.183	313784	248612
CRTC1_MOUSE	CREB-regulated transcription coactivator 1 OS=Mus musculus GN=Crtc1 PE=2 SV=1	-1.262	0.029	2566995	2.02901e+06
NAA40_MOUSE	N-alpha-acetyltransferase 40, NatD catalytic subunit OS=Mus musculus GN=Naa40 PE=2 SV=1	-1.263	0.01	1.17382e+06	929642
NEUR1_MOUSE	Sialidase-1 OS=Mus musculus GN=Neu1 PE=2 SV=1	-1.264	0.1	2.02517e+06	1598844
CAND1_MOUSE	Cullin-associated NEDD8-dissociated protein 1 OS=Mus musculus GN=Cand1 PE=2 SV=2	-1.264	0.0008365	677428	537035
CA123_MOUSE	UPF0587 protein C1orf123 homolog OS=Mus musculus PE=2 SV=1	-1.267	0.0003628	2.02793e+06	1.59396e+06
GSTP1_MOUSE	Glutathione S-transferase P 2 OS=Mus musculus GN=Gstp2 PE=2 SV=2	-1.272	0.118	1.48651e+06	1.18916e+06
GPD1L_MOUSE	Glycerol-3-phosphate dehydrogenase 1-like protein OS=Mus musculus GN=Gpd1l PE=1 SV=2	-1.275	0.028	936941	734662
G6PD1_MOUSE	Glucose-6-phosphate 1-dehydrogenase X OS=Mus musculus GN=G6pdx PE=1 SV=3	-1.277	2.522e-05	2.2179e+06	1.73421e+06
ANXA4_MOUSE	Annexin A4 OS=Mus musculus GN=Anxa4 PE=2 SV=3	-1.278	0.059	429586	336272
ANXA3_MOUSE	Annexin A3 OS=Mus musculus GN=Anxa3 PE=1 SV=3	-1.279	3.883e-08	5.3256e+06	4.19181e+06
PAOX_MOUSE	Peroxisomal N(1)-acetyl-spermine/spermidine oxidase OS=Mus musculus GN=Paox PE=1 SV=3	-1.291	0.05	767559	596424
GBRL1_MOUSE	Gamma-aminobutyric acid receptor-associated protein OS=Mus musculus GN=Gabarap PE=1 SV=2	-1.291	0.464	148007	114432
VP13A_MOUSE	Vacuolar protein sorting-associated protein 13A OS=Mus musculus GN=Vps13a PE=1 SV=1	-1.297	0.001	1.72137e+06	1.3275e+06
CATD_MOUSE	Cathepsin D OS=Mus musculus GN=Ctsd PE=1 SV=1	-1.306	2.132e-13	10071775	7.64356e+06
PTBP1_MOUSE	Polypyrimidine tract-binding protein 1 OS=Mus musculus GN=Ptbp1 PE=1 SV=2	-1.306	0.029	517082	395886
ISOC1_MOUSE	Isochorismatase domain-containing protein 1 OS=Mus musculus GN=Isoc1 PE=2 SV=1	-1.307	0.095	359281	267192
AES_MOUSE	Amino-terminal enhancer of split OS=Mus musculus GN=Aes PE=1 SV=1	-1.308	6.581e-05	2.40405e+06	1.72509e+06
EPN4_MOUSE	Clathrin interactor 1 OS=Mus musculus GN=Clint1 PE=1 SV=2	-1.316	0.051	2.12533e+06	1.58957e+06
OSBL9_MOUSE	Oxysterol-binding protein-related protein 9 OS=Mus musculus GN=Osbpl9 PE=1 SV=1	-1.321	0.147	622275	470442
RENBP_MOUSE	N-acylglucosamine 2-epimerase OS=Mus musculus GN=Renbp PE=2 SV=3	-1.326	0.003	902562	680538
NSUN2_MOUSE	tRNA (cytosine-5-)-methyltransferase NSUN2 OS=Mus musculus GN=Nsun2 PE=1 SV=2	-1.331	0.0004827	1.20536e+06	910345
METK2_MOUSE	S-adenosylmethionine synthase isoform type-2 OS=Mus musculus GN=Mat2a PE=2 SV=2	-1.331	0.0005318	2.70871e+06	1904014
SC31A_MOUSE	Protein transport protein Sec31A OS=Mus musculus GN=Sec31a PE=1 SV=2	-1.334	0.142	761144	568155
VP37C_MOUSE	Vacuolar protein sorting-associated protein 37C OS=Mus musculus GN=Vps37c PE=2 SV=1	-1.334	0.289	1.40202e+06	1.05382e+06
ANXA7_MOUSE	Annexin A7 OS=Mus musculus GN=Anxa7 PE=2 SV=1	-1.339	0.035	1.83069e+06	1.44646e+06
CAB39_MOUSE	Calcium-binding protein 39 OS=Mus musculus GN=Cab39 PE=1 SV=1	-1.344	0.003	930063	640408
STAM2_MOUSE	Signal transducing adapter molecule 2 OS=Mus musculus GN=Stam2 PE=1 SV=1	-1.346	0.166	773960	667124
PSMG1_MOUSE	Proteasome assembly chaperone 1 OS=Mus musculus GN=Psmg1 PE=1 SV=1	-1.348	5.208e-05	999815	749147
EKI1_MOUSE	Ethanolamine kinase 1 (Fragment) OS=Mus musculus GN=Etnk1 PE=2 SV=1	-1.359	0.013	1033269	759830
COMD2_MOUSE	COMM domain-containing protein 2 OS=Mus musculus GN=Commd2 PE=1 SV=1	-1.359	0.07	561203	412639
RNZ2_MOUSE	Zinc phosphodiesterase ELAC protein 2 OS=Mus musculus GN=Elac2 PE=1 SV=1	-1.361	0.063	902631	663696
NAMPT_MOUSE	Nicotinamide phosphoribosyltransferase OS=Mus musculus GN=Nampt PE=1 SV=1	-1.375	1.446e-08	2.75911e+06	2.00721e+06
SDSL_MOUSE	Serine dehydratase-like OS=Mus musculus GN=Sdsl PE=2 SV=1	-1.376	8.234e-07	3419066	2.48443e+06
VTA1_MOUSE	Vacuolar protein sorting-associated protein VTA1 homolog OS=Mus musculus GN=Vta1 PE=1 SV=1	-1.381	1.044e-06	4.11364e+06	2977358
IDE_MOUSE	Insulin-degrading enzyme OS=Mus musculus GN=Ide PE=2 SV=1	-1.384	0.028	817584	637192
ZCCHV_MOUSE	Zinc finger CCCH-type antiviral protein 1 OS=Mus musculus GN=Zc3hav1 PE=1 SV=1	-1.398	0.058	1.32152e+06	947952
ARIP4_MOUSE	Helicase ARIP4 OS=Mus musculus GN=Rad54l2 PE=1 SV=1	-1.416	0.312	1.02275e+06	714469
F168A_MOUSE	Protein FAM168A OS=Mus musculus GN=Fam168a PE=2 SV=1	-1.426	0.003	1.6378e+06	1.14745e+06
ATE1_MOUSE	Arginyl-tRNA--protein transferase 1 OS=Mus musculus GN=Ate1 PE=1 SV=1	-1.427	0.018	492712	345330
HMCS1_MOUSE	Hydroxymethylglutaryl-CoA synthase, cytoplasmic OS=Mus musculus GN=Hmgcs1 PE=1 SV=1	-1.439	1.913e-08	2871155	2.03413e+06
SODC_MOUSE	Superoxide dismutase [Cu-Zn] OS=Mus musculus GN=Sod1 PE=1 SV=2	-1.447	0.002	1.12712e+06	778640
WSDU1_MOUSE	WD repeat, SAM and U-box domain-containing protein 1 OS=Mus musculus GN=Wdsub1 PE=2 SV=1	-1.447	0.055	531036	364433
AIBP_MOUSE	Apolipoprotein A-I-binding protein OS=Mus musculus GN=Apoa1bp PE=1 SV=1	-1.456	0.0007633	2.30332e+06	1582441
MSS4_MOUSE	Guanine nucleotide exchange factor MSS4 OS=Mus musculus GN=Rabif PE=2 SV=1	-1.458	3.645e-07	2242678	1.58716e+06
MAT1_MOUSE	CDK-activating kinase assembly factor MAT1 OS=Mus musculus GN=Mnat1 PE=2 SV=2	-1.458	0.0003925	1.0101e+06	708567
MISSL_MOUSE	MAPK-interacting and spindle-stabilizing protein-like OS=Mus musculus GN=Mapk1ip1l PE=2 SV=3	-1.464	1.433e-09	4605171	3144676
OXSR1_MOUSE	Serine/threonine-protein kinase OSR1 OS=Mus musculus GN=Oxsr1 PE=1 SV=1	-1.498	0.0006622	2.06179e+06	1.53263e+06
GELS_MOUSE	Gelsolin OS=Mus musculus GN=Gsn PE=1 SV=3	-1.499	0.0003499	1.52192e+06	1.0146e+06
UBP14_MOUSE	Ubiquitin carboxyl-terminal hydrolase 14 OS=Mus musculus GN=Usp14 PE=1 SV=3	-1.508	0.0003058	712972	488840
H2A1F_MOUSE	Histone H2A type 2-C OS=Mus musculus GN=Hist2h2ac PE=1 SV=3	-1.521	0.0004314	606436	398683
SAHH_MOUSE	Adenosylhomocysteinase OS=Mus musculus GN=Ahcy PE=1 SV=3	-1.527	6.068e-07	4459668	2.98525e+06
SAR1A_MOUSE	GTP-binding protein SAR1a OS=Mus musculus GN=Sar1a PE=2 SV=1	-1.529	0.099	339027	221034
DNS2A_MOUSE	Deoxyribonuclease-2-alpha OS=Mus musculus GN=Dnase2 PE=2 SV=1	-1.531	3.462e-09	1370416	865448
TFE2_MOUSE	Transcription factor E2-alpha OS=Mus musculus GN=Tcf3 PE=1 SV=2	-1.572	0.042	1.74922e+06	1.30582e+06
TCPZ_MOUSE	T-complex protein 1 subunit zeta OS=Mus musculus GN=Cct6a PE=1 SV=3	-1.595	0.095	135563	85001.2
ENOB_MOUSE	Beta-enolase OS=Mus musculus GN=Eno3 PE=1 SV=3	-1.605	0.0003508	1.80382e+06	1.12408e+06
NUDT5_MOUSE	ADP-sugar pyrophosphatase OS=Mus musculus GN=Nudt5 PE=1 SV=1	-1.62	0.0007962	4.10806e+06	3.22714e+06
SH3L3_MOUSE	SH3 domain-binding glutamic acid-rich-like protein 3 OS=Mus musculus GN=Sh3bgrl3 PE=1 SV=1	-1.64	9.351e-05	993144	605644
PLCG2_MOUSE	1-phosphatidylinositol-4,5-bisphosphate phosphodiesterase gamma-2 OS=Mus musculus GN=Plcg2 PE=1 SV=1	-1.641	1.864e-05	582439	354952
LA_MOUSE	Lupus La protein homolog OS=Mus musculus GN=Ssb PE=2 SV=1	-1.692	0.112	482464	277919
DHSO_MOUSE	Sorbitol dehydrogenase OS=Mus musculus GN=Sord PE=2 SV=3	-1.704	0.007	542547	315164
STT3A_MOUSE	Dolichyl-diphosphooligosaccharide--protein glycosyltransferase subunit STT3A OS=Mus musculus GN=Stt3a PE=1 SV=1	-1.738	0.000628	352729	202764
TLE4_MOUSE	Transducin-like enhancer protein 4 OS=Mus musculus GN=Tle4 PE=1 SV=4	-1.765	1.23e-13	2557066	1.45986e+06
DVL2_MOUSE	Segment polarity protein dishevelled homolog DVL-2 OS=Mus musculus GN=Dvl2 PE=1 SV=1	-1.785	0.022	448702	250836
CRLF2_MOUSE	Isoform 2 of Cytokine receptor-like factor 2 OS=Mus musculus GN=Crlf2	-1.787	0.002	1.18365e+06	664856
HAT1_MOUSE	Histone acetyltransferase type B catalytic subunit OS=Mus musculus GN=Hat1 PE=2 SV=1	-1.812	0.008	276985	152756
PUR4_MOUSE	Phosphoribosylformylglycinamidine synthase OS=Mus musculus GN=Pfas PE=2 SV=1	-1.816	1.438e-13	1.46011e+06	803595
OSBP1_MOUSE	Oxysterol-binding protein 1 OS=Mus musculus GN=Osbp PE=1 SV=2	-1.855	0.0001608	872803	469346
LDLR_MOUSE	Low-density lipoprotein receptor OS=Mus musculus GN=Ldlr PE=1 SV=1	-1.923	0.0007752	786003	403242
SRBP2_MOUSE	Sterol regulatory element-binding protein 2 OS=Mus musculus GN=Srebf2 PE=1 SV=2	-1.953	0.003	444923	227405
LXN_MOUSE	Latexin OS=Mus musculus GN=Lxn PE=1 SV=2	-1.966	0.065	1912810	1.2185e+06
PACS1_MOUSE	Phosphofurin acidic cluster sorting protein 1 OS=Mus musculus GN=Pacs1 PE=1 SV=2	-2.512	1.347e-06	536834	213285
FRRS1_MOUSE	Ferric-chelate reductase 1 OS=Mus musculus GN=FRRS1 PE=1 SV=1	-2.732	1.335e-06	2656665	971109
MCMBP_MOUSE	Mini-chromosome maintenance complex-binding protein OS=Mus musculus GN=Mcmbp PE=2 SV=1	-2.895	1.082e-15	1.56081e+06	538462
LYAG_MOUSE	Lysosomal alpha-glucosidase OS=Mus musculus GN=Gaa PE=1 SV=2	-2.969	8.427e-23	1.0975e+06	369548
FBX3_MOUSE	Isoform 2 of F-box only protein 3 OS=Mus musculus GN=Fbxo3	-6.473	0	5286567	816365
CCD86_MOUSE	Coiled-coil domain-containing protein 86 OS=Mus musculus GN=Ccdc86 PE=1 SV=2	-8.526	1.787e-06	2.06562e+06	461413
CAPS2_MOUSE	Isoform 2 of Calcium-dependent secretion activator 2 OS=Mus musculus GN=Cadps2	-14.708	0	3.61385e+06	245453

## Sheet: 18940 Nuclear
Primary Protein Name	Protein Description	Fold Change	P-value	Intensity1	Intensity2
ERF3A_MOUSE	Eukaryotic peptide chain release factor GTP-binding subunit ERF3A OS=Mus musculus GN=Gspt1 PE=1 SV=1	11.44	1.077e-09	116876	1.36755e+06
PUR6_MOUSE	Multifunctional protein ADE2 OS=Mus musculus GN=Paics PE=1 SV=3	9.836	6.582e-14	150303	1484026
APEH_MOUSE	Acylamino-acid-releasing enzyme OS=Mus musculus GN=Apeh PE=2 SV=2	7.207	2.28e-19	125754	908608
AK1CD_MOUSE	Aldo-keto reductase family 1 member C13 OS=Mus musculus GN=Akr1c13 PE=1 SV=2	6.889	2.971e-21	864783	4751666
WNK1_MOUSE	Isoform 2 of Serine/threonine-protein kinase WNK1 OS=Mus musculus GN=Wnk1	6.859	0	450516	3.06359e+06
ACACA_MOUSE	Acetyl-CoA carboxylase 1 OS=Mus musculus GN=Acaca PE=1 SV=1	6.558	0	197577	1.29512e+06
ELP2_MOUSE	Elongator complex protein 2 OS=Mus musculus GN=Elp2 PE=1 SV=1	6.1	6.767e-34	276102	1.68464e+06
PRDX6_MOUSE	Peroxiredoxin-6 OS=Mus musculus GN=Prdx6 PE=1 SV=3	5.995	2.484e-11	199460	1.20381e+06
MKL2_MOUSE	MKL/myocardin-like protein 2 OS=Mus musculus GN=Mkl2 PE=1 SV=1	5.931	0	362492	2.14974e+06
ELP3_MOUSE	Elongator complex protein 3 OS=Mus musculus GN=Elp3 PE=2 SV=1	5.758	9.294e-05	203315	1.21084e+06
EMAL2_MOUSE	Echinoderm microtubule-associated protein-like 2 OS=Mus musculus GN=Eml2 PE=2 SV=1	5.75	0	698657	3.99917e+06
MGAT3_MOUSE	Beta-1,4-mannosyl-glycoprotein 4-beta-N-acetylglucosaminyltransferase OS=Mus musculus GN=Mgat3 PE=1 SV=2	5.648	7.358e-19	209230	1184446
DCPS_MOUSE	Scavenger mRNA-decapping enzyme DcpS OS=Mus musculus GN=Dcps PE=1 SV=1	5.531	3.88e-32	353186	1.95518e+06
UBQL1_MOUSE	Ubiquilin-1 OS=Mus musculus GN=Ubqln1 PE=1 SV=1	5.492	0	1.38445e+06	7639954
RD23B_MOUSE	UV excision repair protein RAD23 homolog B OS=Mus musculus GN=Rad23b PE=1 SV=1	5.311	2.237e-15	625234	3.15579e+06
KCY_MOUSE	UMP-CMP kinase OS=Mus musculus GN=Cmpk1 PE=1 SV=1	5.311	5.636e-13	99570.3	529003
ADH1_MOUSE	Alcohol dehydrogenase 1 OS=Mus musculus GN=Adh1 PE=2 SV=2	5.137	0	625865	3.14008e+06
HSP74_MOUSE	Heat shock 70 kDa protein 4 OS=Mus musculus GN=Hspa4 PE=1 SV=1	5.059	5.54e-11	423471	2.15054e+06
HECD1_MOUSE	E3 ubiquitin-protein ligase HECTD1 OS=Mus musculus GN=Hectd1 PE=1 SV=2	5.041	0	974322	4914440
PAXI_MOUSE	Paxillin OS=Mus musculus GN=Pxn PE=1 SV=1	4.942	0	1.02551e+06	5.06852e+06
EIF3C_MOUSE	Eukaryotic translation initiation factor 3 subunit C OS=Mus musculus GN=Eif3c PE=1 SV=1	4.878	4.204e-09	984240	3.65681e+06
PEPD_MOUSE	Xaa-Pro dipeptidase OS=Mus musculus GN=Pepd PE=2 SV=3	4.835	9.167e-10	517307	2.81049e+06
HGS_MOUSE	Hepatocyte growth factor-regulated tyrosine kinase substrate OS=Mus musculus GN=Hgs PE=1 SV=2	4.667	7.563e-18	661788	3.1039e+06
ACSA_MOUSE	Acetyl-coenzyme A synthetase, cytoplasmic OS=Mus musculus GN=Acss2 PE=1 SV=1	4.638	0	1.02793e+06	4766859
AATC_MOUSE	Aspartate aminotransferase, cytoplasmic OS=Mus musculus GN=Got1 PE=1 SV=2	4.63	1.179e-10	153347	711204
MAT2B_MOUSE	Methionine adenosyltransferase 2 subunit beta OS=Mus musculus GN=Mat2b PE=2 SV=1	4.504	2.738e-40	624610	2.71416e+06
PSB6_MOUSE	Proteasome subunit beta type-6 OS=Mus musculus GN=Psmb6 PE=1 SV=3	4.432	0	3.05893e+06	13510539
USP9X_MOUSE	Probable ubiquitin carboxyl-terminal hydrolase FAF-X OS=Mus musculus GN=Usp9x PE=1 SV=1	4.362	1.542e-08	159597	699431
HINT1_MOUSE	Histidine triad nucleotide-binding protein 1 OS=Mus musculus GN=Hint1 PE=1 SV=3	4.361	3.503e-43	2221326	9710790
MDHC_MOUSE	Malate dehydrogenase, cytoplasmic OS=Mus musculus GN=Mdh1 PE=1 SV=3	4.343	3.852e-35	815780	3.18754e+06
PPAC_MOUSE	Low molecular weight phosphotyrosine protein phosphatase OS=Mus musculus GN=Acp1 PE=2 SV=3	4.318	1.135e-14	1.03754e+06	4493995
TYSY_MOUSE	Thymidylate synthase OS=Mus musculus GN=Tyms PE=1 SV=1	4.147	7.719e-14	329890	1.37127e+06
PSA2_MOUSE	Proteasome subunit alpha type-2 OS=Mus musculus GN=Psma2 PE=1 SV=2	4.13	1.043e-41	648178	2567417
ANM1_MOUSE	Isoform 2 of Protein arginine N-methyltransferase 1 OS=Mus musculus GN=Prmt1	4.11	0	1.11673e+06	4.46516e+06
CD041_MOUSE	UPF0636 protein C4orf41 homolog OS=Mus musculus PE=2 SV=1	4.11	2.528e-08	170329	702548
MK01_MOUSE	Mitogen-activated protein kinase 1 OS=Mus musculus GN=Mapk1 PE=1 SV=3	4.105	5.64e-20	561939	2314595
SYK_MOUSE	Lysyl-tRNA synthetase OS=Mus musculus GN=Kars PE=1 SV=1	4.087	8.255e-28	827782	3.27344e+06
CASP6_MOUSE	Caspase-6 OS=Mus musculus GN=Casp6 PE=2 SV=1	4.08	3.388e-26	490341	2.0008e+06
TALDO_MOUSE	Transaldolase OS=Mus musculus GN=Taldo1 PE=1 SV=2	4.011	2.382e-44	901608	3.61964e+06
SAHH_MOUSE	Adenosylhomocysteinase OS=Mus musculus GN=Ahcy PE=1 SV=3	4.01	0	3170603	12487251
DPOD2_MOUSE	DNA polymerase delta subunit 2 OS=Mus musculus GN=Pold2 PE=2 SV=1	3.98	5.126e-07	336713	1.37439e+06
TXNL1_MOUSE	Thioredoxin-like protein 1 OS=Mus musculus GN=Txnl1 PE=1 SV=3	3.978	0	751910	2.98316e+06
SMUF1_MOUSE	E3 ubiquitin-protein ligase SMURF1 OS=Mus musculus GN=Smurf1 PE=1 SV=2	3.933	9.85e-42	498723	1.96227e+06
SCYL2_MOUSE	SCY1-like protein 2 OS=Mus musculus GN=Scyl2 PE=1 SV=1	3.908	0	840802	3.55374e+06
LGUL_MOUSE	Lactoylglutathione lyase OS=Mus musculus GN=Glo1 PE=1 SV=3	3.905	0	1.83739e+06	7.17636e+06
MINK1_MOUSE	Isoform 2 of Traf2 and NCK-interacting protein kinase OS=Mus musculus GN=Tnik	3.903	0	2.66657e+06	10403599
PRS10_MOUSE	26S protease regulatory subunit 10B OS=Mus musculus GN=Psmc6 PE=1 SV=1	3.899	1.176e-23	256749	1002483
HPRT_MOUSE	Hypoxanthine-guanine phosphoribosyltransferase OS=Mus musculus GN=Hprt1 PE=1 SV=3	3.895	0	1.56273e+06	6099152
PSB2_MOUSE	Proteasome subunit beta type-2 OS=Mus musculus GN=Psmb2 PE=1 SV=1	3.894	8.027e-08	78319.9	305773
SERA_MOUSE	D-3-phosphoglycerate dehydrogenase OS=Mus musculus GN=Phgdh PE=1 SV=3	3.886	0	2.38227e+06	9535623
METK2_MOUSE	S-adenosylmethionine synthase isoform type-2 OS=Mus musculus GN=Mat2a PE=2 SV=2	3.883	0	974196	3767003
STIP1_MOUSE	Stress-induced-phosphoprotein 1 OS=Mus musculus GN=Stip1 PE=1 SV=1	3.867	0	2286436	8840918
UBP5_MOUSE	Ubiquitin carboxyl-terminal hydrolase 5 OS=Mus musculus GN=Usp5 PE=1 SV=1	3.864	2.831e-17	272104	1.05187e+06
KCTD9_MOUSE	BTB/POZ domain-containing protein KCTD9 OS=Mus musculus GN=Kctd9 PE=2 SV=1	3.847	2.337e-10	393464	1.52113e+06
PTPA_MOUSE	Serine/threonine-protein phosphatase 2A activator OS=Mus musculus GN=Ppp2r4 PE=1 SV=1	3.842	0	896393	3.4482e+06
MIF_MOUSE	Macrophage migration inhibitory factor OS=Mus musculus GN=Mif PE=1 SV=2	3.839	0	4.75218e+06	18279704
ADHX_MOUSE	Alcohol dehydrogenase class-3 OS=Mus musculus GN=Adh5 PE=1 SV=3	3.838	0	1.02984e+06	3793850
TCPA_MOUSE	T-complex protein 1 subunit alpha OS=Mus musculus GN=Tcp1 PE=1 SV=3	3.834	0	902943	3471454
CDK6_MOUSE	Cyclin-dependent kinase 6 OS=Mus musculus GN=Cdk6 PE=2 SV=2	3.811	0	266481	1.01819e+06
THOP1_MOUSE	Thimet oligopeptidase OS=Mus musculus GN=Thop1 PE=1 SV=1	3.808	1.314e-11	582310	1.82615e+06
TYW1_MOUSE	tRNA wybutosine-synthesizing protein 1 homolog OS=Mus musculus GN=Tyw1 PE=1 SV=1	3.787	2.158e-28	210182	795973
K6PL_MOUSE	6-phosphofructokinase, liver type OS=Mus musculus GN=Pfkl PE=1 SV=3	3.781	2.326e-43	1.83523e+06	7.35225e+06
TGM2_MOUSE	Protein-glutamine gamma-glutamyltransferase 2 OS=Mus musculus GN=Tgm2 PE=1 SV=4	3.774	7.883e-11	764568	2.58173e+06
ZYX_MOUSE	Zyxin OS=Mus musculus GN=Zyx PE=1 SV=1	3.77	0	2.33107e+06	8833896
DPP9_MOUSE	Dipeptidyl peptidase 9 OS=Mus musculus GN=Dpp9 PE=2 SV=2	3.748	0	428523	1.60645e+06
PSD13_MOUSE	26S proteasome non-ATPase regulatory subunit 13 OS=Mus musculus GN=Psmd13 PE=1 SV=1	3.74	0	1.58313e+06	6013143
PPP6_MOUSE	Serine/threonine-protein phosphatase 6 catalytic subunit OS=Mus musculus GN=Ppp6c PE=2 SV=1	3.736	1.193e-18	658038	2447071
PROF1_MOUSE	Profilin-1 OS=Mus musculus GN=Pfn1 PE=1 SV=2	3.73	0	5448839	20562646
PGK1_MOUSE	Phosphoglycerate kinase 1 OS=Mus musculus GN=Pgk1 PE=1 SV=4	3.727	0	2.40614e+06	8859200
PSA6_MOUSE	Proteasome subunit alpha type-6 OS=Mus musculus GN=Psma6 PE=1 SV=1	3.724	0	1.50176e+06	5.46053e+06
ENOA_MOUSE	Alpha-enolase OS=Mus musculus GN=Eno1 PE=1 SV=3	3.679	5.605e-45	5009763	17650370
COFA1_MOUSE	Collagen alpha-1(XV) chain OS=Mus musculus GN=Col15a1 PE=1 SV=2	3.679	0	3120860	11479188
PUR4_MOUSE	Phosphoribosylformylglycinamidine synthase OS=Mus musculus GN=Pfas PE=2 SV=1	3.669	0	484063	1.7596e+06
S23IP_MOUSE	SEC23-interacting protein OS=Mus musculus GN=Sec23ip PE=1 SV=2	3.661	1.534e-12	2.05895e+06	8105999
UBA1_MOUSE	Ubiquitin-like modifier-activating enzyme 1 OS=Mus musculus GN=Uba1 PE=1 SV=1	3.659	0	2.13747e+06	8785374
6PGD_MOUSE	6-phosphogluconate dehydrogenase, decarboxylating OS=Mus musculus GN=Pgd PE=2 SV=3	3.658	1.401e-45	981278	3671095
IF4E_MOUSE	Eukaryotic translation initiation factor 4E OS=Mus musculus GN=Eif4e PE=1 SV=1	3.657	4.531e-10	690233	2.49435e+06
ECM29_MOUSE	Proteasome-associated protein ECM29 homolog OS=Mus musculus GN=Ecm29 PE=1 SV=2	3.651	0	142432	526037
CARM1_MOUSE	Histone-arginine methyltransferase CARM1 OS=Mus musculus GN=Carm1 PE=1 SV=2	3.649	0	3.40219e+06	12286797
HS90A_MOUSE	Heat shock protein HSP 90-alpha OS=Mus musculus GN=Hsp90aa1 PE=1 SV=4	3.645	0	1.22322e+06	4678682
VP13C_MOUSE	Isoform 2 of Vacuolar protein sorting-associated protein 13C OS=Mus musculus GN=Vps13c	3.642	1.071e-08	62895.6	229170
RIR1_MOUSE	Ribonucleoside-diphosphate reductase large subunit OS=Mus musculus GN=Rrm1 PE=1 SV=1	3.631	3.09e-21	1.71032e+06	7.76297e+06
DCUP_MOUSE	Uroporphyrinogen decarboxylase OS=Mus musculus GN=Urod PE=1 SV=2	3.624	4.872e-06	78482.6	285234
MAOX_MOUSE	NADP-dependent malic enzyme OS=Mus musculus GN=Me1 PE=1 SV=1	3.617	1.825e-19	274750	994252
TRXR1_MOUSE	Thioredoxin reductase 1, cytoplasmic OS=Mus musculus GN=Txnrd1 PE=1 SV=3	3.598	0	1.91919e+06	6.85422e+06
AMPD2_MOUSE	AMP deaminase 2 OS=Mus musculus GN=Ampd2 PE=1 SV=1	3.598	7.995e-15	460460	1.6592e+06
LDHA_MOUSE	L-lactate dehydrogenase A chain OS=Mus musculus GN=Ldha PE=1 SV=3	3.589	0	10094888	36224752
GSTO1_MOUSE	Glutathione S-transferase omega-1 OS=Mus musculus GN=Gsto1 PE=2 SV=2	3.584	5.137e-19	371595	1.334e+06
CAP1_MOUSE	Adenylyl cyclase-associated protein 1 OS=Mus musculus GN=Cap1 PE=1 SV=3	3.579	0	714510	2.76198e+06
KPYM_MOUSE	Isoform M1 of Pyruvate kinase isozymes M1/M2 OS=Mus musculus GN=Pkm2	3.578	0	4.76991e+06	16150987
TKT_MOUSE	Transketolase OS=Mus musculus GN=Tkt PE=1 SV=1	3.573	0	5639506	19361296
PA1B2_MOUSE	Platelet-activating factor acetylhydrolase IB subunit beta OS=Mus musculus GN=Pafah1b2 PE=1 SV=2	3.568	3.308e-14	418175	1.49915e+06
HEM2_MOUSE	Delta-aminolevulinic acid dehydratase OS=Mus musculus GN=Alad PE=1 SV=1	3.552	0	1.36194e+06	4844873
IMPA1_MOUSE	Inositol monophosphatase 1 OS=Mus musculus GN=Impa1 PE=1 SV=1	3.549	0	1.53688e+06	5452679
PP4C_MOUSE	Serine/threonine-protein phosphatase 4 catalytic subunit OS=Mus musculus GN=Ppp4c PE=1 SV=2	3.546	6.526e-23	349081	1238880
SYG_MOUSE	Glycyl-tRNA synthetase OS=Mus musculus GN=Gars PE=1 SV=1	3.533	6.989e-18	355752	1257394
PLAP_MOUSE	Phospholipase A-2-activating protein OS=Mus musculus GN=Plaa PE=2 SV=3	3.53	8.738e-09	760738	2776988
TAXB1_MOUSE	Tax1-binding protein 1 homolog OS=Mus musculus GN=Tax1bp1 PE=1 SV=2	3.525	1.816e-17	1.20519e+06	4246562
IPO4_MOUSE	Importin-4 OS=Mus musculus GN=Ipo4 PE=1 SV=1	3.517	5.793e-08	211395	748218
CLIC1_MOUSE	Chloride intracellular channel protein 1 OS=Mus musculus GN=Clic1 PE=1 SV=3	3.514	0	1.09084e+06	3.83383e+06
HEM3_MOUSE	Porphobilinogen deaminase OS=Mus musculus GN=Hmbs PE=2 SV=1	3.508	1.995e-17	191590	672146
TPIS_MOUSE	Triosephosphate isomerase OS=Mus musculus GN=Tpi1 PE=1 SV=3	3.506	0	8.10709e+06	28789788
CPNE3_MOUSE	Copine-3 OS=Mus musculus GN=Cpne3 PE=1 SV=2	3.502	2.133e-22	442917	1.55123e+06
TCPQ_MOUSE	T-complex protein 1 subunit theta OS=Mus musculus GN=Cct8 PE=1 SV=3	3.492	0	2383139	8.19645e+06
DNPEP_MOUSE	Aspartyl aminopeptidase OS=Mus musculus GN=Dnpep PE=2 SV=1	3.487	8.108e-05	644632	1.70526e+06
TLN1_MOUSE	Talin-1 OS=Mus musculus GN=Tln1 PE=1 SV=1	3.487	0	865907	2.98609e+06
PSB3_MOUSE	Proteasome subunit beta type-3 OS=Mus musculus GN=Psmb3 PE=1 SV=1	3.473	2.416e-05	426303	1.49952e+06
G3P_MOUSE	Glyceraldehyde-3-phosphate dehydrogenase OS=Mus musculus GN=Gapdh PE=1 SV=2	3.47	0	8572001	30321072
PPCE_MOUSE	Prolyl endopeptidase OS=Mus musculus GN=Prep PE=2 SV=1	3.469	2.793e-10	1319606	4965126
6PGL_MOUSE	6-phosphogluconolactonase OS=Mus musculus GN=Pgls PE=2 SV=1	3.466	1.667e-21	1.02115e+06	3520716
G6PI_MOUSE	Glucose-6-phosphate isomerase OS=Mus musculus GN=Gpi PE=1 SV=4	3.463	0	3045927	10216825
PSMD8_MOUSE	26S proteasome non-ATPase regulatory subunit 8 OS=Mus musculus GN=Psmd8 PE=2 SV=2	3.463	4.816e-30	700257	2.42434e+06
PYRG1_MOUSE	CTP synthase 1 OS=Mus musculus GN=Ctps PE=1 SV=2	3.446	5.137e-20	310041	1.06798e+06
TAB1_MOUSE	TGF-beta-activated kinase 1 and MAP3K7-binding protein 1 OS=Mus musculus GN=Tab1 PE=1 SV=2	3.442	2.239e-26	609157	2.19796e+06
SBP1_MOUSE	Selenium-binding protein 1 OS=Mus musculus GN=Selenbp1 PE=1 SV=2	3.441	9.317e-25	835044	2.73561e+06
TBB2C_MOUSE	Tubulin beta-2C chain OS=Mus musculus GN=Tubb2c PE=1 SV=1	3.438	0	2.99036e+06	10062118
TCPB_MOUSE	T-complex protein 1 subunit beta OS=Mus musculus GN=Cct2 PE=1 SV=4	3.428	6.211e-30	1.03473e+06	3.85672e+06
MYO5A_MOUSE	Isoform 3 of Myosin-Vb OS=Mus musculus GN=Myo5b	3.422	0.000321	61422.3	210705
PSMD2_MOUSE	26S proteasome non-ATPase regulatory subunit 2 OS=Mus musculus GN=Psmd2 PE=1 SV=1	3.422	3.587e-29	637264	2.10953e+06
TCPG_MOUSE	T-complex protein 1 subunit gamma OS=Mus musculus GN=Cct3 PE=1 SV=1	3.419	0	2.14093e+06	7.36459e+06
PSA1_MOUSE	Proteasome subunit alpha type-1 OS=Mus musculus GN=Psma1 PE=1 SV=1	3.413	4.144e-09	4.57261e+06	15523478
PSD12_MOUSE	26S proteasome non-ATPase regulatory subunit 12 OS=Mus musculus GN=Psmd12 PE=2 SV=3	3.412	0	824377	2.81341e+06
1433B_MOUSE	14-3-3 protein beta/alpha OS=Mus musculus GN=Ywhab PE=1 SV=3	3.398	0	10279982	34935928
SERC_MOUSE	Phosphoserine aminotransferase OS=Mus musculus GN=Psat1 PE=1 SV=1	3.396	0	672494	2367212
XPO2_MOUSE	Exportin-2 OS=Mus musculus GN=Cse1l PE=2 SV=1	3.389	0	897695	3067495
PRRC1_MOUSE	Protein PRRC1 OS=Mus musculus GN=Prrc1 PE=2 SV=1	3.378	5.06e-40	2.34402e+06	8.14029e+06
MMS19_MOUSE	MMS19 nucleotide excision repair protein homolog OS=Mus musculus GN=Mms19 PE=1 SV=1	3.376	1.136e-09	104119	351756
GALK1_MOUSE	Galactokinase OS=Mus musculus GN=Galk1 PE=2 SV=1	3.374	0	732892	2.47244e+06
BACH_MOUSE	Isoform A of Cytosolic acyl coenzyme A thioester hydrolase OS=Mus musculus GN=Acot7	3.372	0	342746	1.15384e+06
ALDOA_MOUSE	Fructose-bisphosphate aldolase A OS=Mus musculus GN=Aldoa PE=1 SV=2	3.371	0	11394255	38258404
XPP1_MOUSE	Xaa-Pro aminopeptidase 1 OS=Mus musculus GN=Xpnpep1 PE=2 SV=1	3.363	0	1.13836e+06	3.62355e+06
WDR1_MOUSE	WD repeat-containing protein 1 OS=Mus musculus GN=Wdr1 PE=1 SV=3	3.36	0	2.15781e+06	7.07001e+06
PEBP1_MOUSE	Phosphatidylethanolamine-binding protein 1 OS=Mus musculus GN=Pebp1 PE=1 SV=3	3.354	0	3.05469e+06	10245842
TBA4A_MOUSE	Tubulin alpha-4A chain OS=Mus musculus GN=Tuba4a PE=1 SV=1	3.348	0	4.3841e+06	14036312
OLA1_MOUSE	Obg-like ATPase 1 OS=Mus musculus GN=Ola1 PE=1 SV=1	3.346	7.604e-36	491914	1.77157e+06
TCPZ_MOUSE	T-complex protein 1 subunit zeta OS=Mus musculus GN=Cct6a PE=1 SV=3	3.345	0	886284	3.01231e+06
1433T_MOUSE	14-3-3 protein theta OS=Mus musculus GN=Ywhaq PE=1 SV=1	3.334	0	2802185	9354532
DRG2_MOUSE	Developmentally-regulated GTP-binding protein 2 OS=Mus musculus GN=Drg2 PE=1 SV=1	3.322	5.308e-08	123049	408857
PRC2B_MOUSE	Protein PRRC2B OS=Mus musculus GN=Prrc2b PE=1 SV=1	3.321	2.837e-35	545130	1.78602e+06
NDKB_MOUSE	Nucleoside diphosphate kinase B OS=Mus musculus GN=Nme2 PE=1 SV=1	3.32	0	2.41062e+06	8099724
HUWE1_MOUSE	E3 ubiquitin-protein ligase HUWE1 OS=Mus musculus GN=Huwe1 PE=1 SV=4	3.317	0	1.48566e+06	4.9277e+06
PNPH_MOUSE	Purine nucleoside phosphorylase OS=Mus musculus GN=Pnp PE=1 SV=2	3.317	0	1.53504e+06	5.09979e+06
CSK_MOUSE	Tyrosine-protein kinase CSK OS=Mus musculus GN=Csk PE=1 SV=1	3.312	0	490705	1.62527e+06
K6PP_MOUSE	6-phosphofructokinase type C OS=Mus musculus GN=Pfkp PE=1 SV=1	3.31	0	2.00862e+06	7030170
TPP2_MOUSE	Isoform Short of Tripeptidyl-peptidase 2 OS=Mus musculus GN=Tpp2	3.303	1.401e-45	1317744	4.32822e+06
CNDP2_MOUSE	Cytosolic non-specific dipeptidase OS=Mus musculus GN=Cndp2 PE=1 SV=1	3.296	0	502508	1656005
IPO5_MOUSE	Importin-5 OS=Mus musculus GN=Ipo5 PE=1 SV=3	3.292	8.521e-35	1.48174e+06	5152805
EIF3E_MOUSE	Eukaryotic translation initiation factor 3 subunit E OS=Mus musculus GN=Eif3e PE=1 SV=1	3.284	0	2.84685e+06	9489024
MYL6_MOUSE	Myosin light polypeptide 6 OS=Mus musculus GN=Myl6 PE=1 SV=3	3.28	0	3106184	10200014
COPB2_MOUSE	Coatomer subunit beta' OS=Mus musculus GN=Copb2 PE=2 SV=2	3.278	1.101e-21	1.02194e+06	3.12148e+06
PSA_MOUSE	Puromycin-sensitive aminopeptidase OS=Mus musculus GN=Npepps PE=1 SV=2	3.276	2.032e-41	286031	955889
KAP3_MOUSE	cAMP-dependent protein kinase type II-beta regulatory subunit OS=Mus musculus GN=Prkar2b PE=1 SV=3	3.259	4.689e-39	844488	2.75174e+06
EIF3A_MOUSE	Eukaryotic translation initiation factor 3 subunit A OS=Mus musculus GN=Eif3a PE=1 SV=4	3.255	0	749762	2.47266e+06
SC31A_MOUSE	Protein transport protein Sec31A OS=Mus musculus GN=Sec31a PE=1 SV=2	3.252	0	2.59526e+06	8435510
SYEP_MOUSE	Bifunctional aminoacyl-tRNA synthetase OS=Mus musculus GN=Eprs PE=2 SV=3	3.238	8.688e-44	1.29628e+06	4.24532e+06
PSB8_MOUSE	Proteasome subunit beta type-8 OS=Mus musculus GN=Psmb8 PE=1 SV=2	3.231	0	1.057e+06	3.30379e+06
UN13D_MOUSE	Protein unc-13 homolog D OS=Mus musculus GN=Unc13d PE=1 SV=2	3.216	3.569e-06	127843	347279
TBB5_MOUSE	Tubulin beta-5 chain OS=Mus musculus GN=Tubb5 PE=1 SV=1	3.213	0	5286948	17060180
ACSF2_MOUSE	Acyl-CoA synthetase family member 2, mitochondrial OS=Mus musculus GN=Acsf2 PE=2 SV=1	3.211	1.182e-05	66106.9	212431
PUR9_MOUSE	Bifunctional purine biosynthesis protein PURH OS=Mus musculus GN=Atic PE=1 SV=2	3.207	1.169e-41	983846	3.06515e+06
FAS_MOUSE	Fatty acid synthase OS=Mus musculus GN=Fasn PE=1 SV=2	3.206	3.128e-21	1.48499e+06	4974752
SPEE_MOUSE	Spermidine synthase OS=Mus musculus GN=Srm PE=2 SV=1	3.193	0	1.54782e+06	5107106
PRPS1_MOUSE	Ribose-phosphate pyrophosphokinase 1 OS=Mus musculus GN=Prps1 PE=1 SV=3	3.178	0	2.61588e+06	8314336
ANXA2_MOUSE	Annexin A2 OS=Mus musculus GN=Anxa2 PE=1 SV=2	3.178	1.358e-18	1272786	4051935
TBA1B_MOUSE	Tubulin alpha-1B chain OS=Mus musculus GN=Tuba1b PE=1 SV=2	3.178	0	8860989	27577800
HMHA1_MOUSE	Minor histocompatibility protein HA-1 OS=Mus musculus GN=Hmha1 PE=1 SV=2	3.176	2.349e-27	219583	697299
CAZA1_MOUSE	F-actin-capping protein subunit alpha-1 OS=Mus musculus GN=Capza1 PE=1 SV=4	3.175	9.59e-07	356033	1.13766e+06
PUR2_MOUSE	Trifunctional purine biosynthetic protein adenosine-3 OS=Mus musculus GN=Gart PE=2 SV=2	3.175	2.23e-06	203589	692035
STXB5_MOUSE	Syntaxin-binding protein 5 OS=Mus musculus GN=Stxbp5 PE=1 SV=2	3.17	1.824e-40	458288	1452614
LIS1_MOUSE	Platelet-activating factor acetylhydrolase IB subunit alpha OS=Mus musculus GN=Pafah1b1 PE=1 SV=2	3.162	2.824e-26	976318	3.08212e+06
CAPR1_MOUSE	Caprin-1 OS=Mus musculus GN=Caprin1 PE=1 SV=2	3.152	4.532e-28	545437	1.81635e+06
PGAM1_MOUSE	Phosphoglycerate mutase 1 OS=Mus musculus GN=Pgam1 PE=1 SV=3	3.151	0	1.21023e+06	3.9102e+06
SYLC_MOUSE	Leucyl-tRNA synthetase, cytoplasmic OS=Mus musculus GN=Lars PE=2 SV=2	3.145	0.0001818	210764	665406
ARAP3_MOUSE	Arf-GAP with Rho-GAP domain, ANK repeat and PH domain-containing protein 3 OS=Mus musculus GN=Arap3 PE=1 SV=2	3.141	1.384e-09	102595	322182
GTPB1_MOUSE	GTP-binding protein 1 OS=Mus musculus GN=Gtpbp1 PE=1 SV=2	3.134	1.666e-34	286108	896787
1433F_MOUSE	14-3-3 protein eta OS=Mus musculus GN=Ywhah PE=1 SV=2	3.134	2.756e-36	1.43096e+06	4.48547e+06
EF2_MOUSE	Elongation factor 2 OS=Mus musculus GN=Eef2 PE=1 SV=2	3.112	0	3.85455e+06	12389776
NCOAT_MOUSE	Bifunctional protein NCOAT OS=Mus musculus GN=Mgea5 PE=1 SV=2	3.111	0	788461	2478090
TCPD_MOUSE	T-complex protein 1 subunit delta OS=Mus musculus GN=Cct4 PE=1 SV=3	3.1	0	829334	2.66598e+06
DNM1L_MOUSE	Isoform 2 of Dynamin-1-like protein OS=Mus musculus GN=Dnm1l	3.099	0	406926	1.28708e+06
NB5R3_MOUSE	NADH-cytochrome b5 reductase 3 OS=Mus musculus GN=Cyb5r3 PE=1 SV=3	3.096	0.0002917	2005719	7043472
PSA4_MOUSE	Proteasome subunit alpha type-4 OS=Mus musculus GN=Psma4 PE=1 SV=1	3.095	0	1.33685e+06	4.12949e+06
TCPH_MOUSE	T-complex protein 1 subunit eta OS=Mus musculus GN=Cct7 PE=1 SV=1	3.074	3.362e-39	713429	2.34498e+06
NEDD4_MOUSE	E3 ubiquitin-protein ligase NEDD4 OS=Mus musculus GN=Nedd4 PE=1 SV=3	3.058	5.186e-21	887388	2714361
KAT3_MOUSE	Kynurenine--oxoglutarate transaminase 3 OS=Mus musculus GN=Ccbl2 PE=1 SV=1	3.056	1.08e-07	210642	635342
PSA5_MOUSE	Proteasome subunit alpha type-5 OS=Mus musculus GN=Psma5 PE=1 SV=1	3.051	4.533e-31	313999	958017
SCFD1_MOUSE	Isoform 2 of Sec1 family domain-containing protein 1 OS=Mus musculus GN=Scfd1	3.037	2.662e-19	194283	590166
IDI1_MOUSE	Isopentenyl-diphosphate Delta-isomerase 1 OS=Mus musculus GN=Idi1 PE=2 SV=1	3.035	2.215e-10	895653	2.74483e+06
APAF_MOUSE	Apoptotic protease-activating factor 1 OS=Mus musculus GN=Apaf1 PE=1 SV=2	3.027	1.365e-09	87266.1	264111
1433Z_MOUSE	14-3-3 protein zeta/delta - Mus musculus (Mouse)	3.022	0	2.34082e+06	7.18367e+06
GDIB_MOUSE	Rab GDP dissociation inhibitor beta OS=Mus musculus GN=Gdi2 PE=1 SV=1	3.007	9.325e-05	773276	2.68459e+06
MYH9_MOUSE	Myosin-9 OS=Mus musculus GN=Myh9 PE=1 SV=3	3.002	3.969e-36	924188	2.73156e+06
RBM12_MOUSE	RNA-binding protein 12 OS=Mus musculus GN=Rbm12 PE=1 SV=3	2.993	1.359e-13	947453	3095535
NUCB1_MOUSE	Nucleobindin-1 OS=Mus musculus GN=Nucb1 PE=1 SV=2	2.983	0	937463	2.63022e+06
AP1G1_MOUSE	AP-1 complex subunit gamma-1 OS=Mus musculus GN=Ap1g1 PE=1 SV=3	2.981	2.298e-43	481437	1.43519e+06
TAB2_MOUSE	TGF-beta-activated kinase 1 and MAP3K7-binding protein 2 OS=Mus musculus GN=Tab2 PE=1 SV=1	2.966	6.414e-09	485925	1.4078e+06
IQGA1_MOUSE	Ras GTPase-activating-like protein IQGAP1 OS=Mus musculus GN=Iqgap1 PE=1 SV=1	2.963	1.045e-25	258780	766836
PLSL_MOUSE	Plastin-2 OS=Mus musculus GN=Lcp1 PE=1 SV=4	2.961	0	1826714	5516923
SYAC_MOUSE	Alanyl-tRNA synthetase, cytoplasmic OS=Mus musculus GN=Aars PE=1 SV=1	2.953	8.719e-13	433610	1.20039e+06
PSMD6_MOUSE	26S proteasome non-ATPase regulatory subunit 6 OS=Mus musculus GN=Psmd6 PE=2 SV=1	2.951	4.467e-17	1.44039e+06	5270813
LEG1_MOUSE	Galectin-1 OS=Mus musculus GN=Lgals1 PE=1 SV=3	2.938	0	4447416	13062098
EIF3G_MOUSE	Eukaryotic translation initiation factor 3 subunit G OS=Mus musculus GN=Eif3g PE=1 SV=2	2.935	3.383e-12	152972	448994
TET2_MOUSE	Methylcytosine dioxygenase TET2 OS=Mus musculus GN=Tet2 PE=1 SV=3	2.924	6.467e-05	32494.5	103267
SDCB1_MOUSE	Syntenin-1 OS=Mus musculus GN=Sdcbp PE=1 SV=1	2.923	6.87e-14	199065	581894
KPYM_MOUSE	Pyruvate kinase isozymes M1/M2 OS=Mus musculus GN=Pkm2 PE=1 SV=4	2.905	0	4.09236e+06	12284548
UBQL2_MOUSE	Ubiquilin-2 OS=Mus musculus GN=Ubqln2 PE=1 SV=1	2.9	6.029e-16	1.43009e+06	3.58178e+06
1433G_MOUSE	14-3-3 protein gamma - Mus musculus (Mouse)	2.897	7.84e-14	204844	593457
SYRC_MOUSE	Arginyl-tRNA synthetase, cytoplasmic OS=Mus musculus GN=Rars PE=2 SV=2	2.89	2.54e-22	948342	2625386
SAR1B_MOUSE	GTP-binding protein SAR1b OS=Mus musculus GN=Sar1b PE=1 SV=1	2.886	4.834e-18	696623	2.0129e+06
UBR4_MOUSE	Isoform 3 of E3 ubiquitin-protein ligase UBR4 OS=Mus musculus GN=Ubr4	2.886	2.149e-10	123288	393422
EIF3L_MOUSE	Eukaryotic translation initiation factor 3 subunit L OS=Mus musculus GN=Eif3l PE=1 SV=1	2.885	0	905426	2.74271e+06
NEUL_MOUSE	Neurolysin, mitochondrial OS=Mus musculus GN=Nln PE=2 SV=1	2.883	4.938e-06	212937	615483
INO1_MOUSE	Inositol-3-phosphate synthase 1 OS=Mus musculus GN=Isyna1 PE=2 SV=1	2.869	0.0002258	148628	426741
SMG7_MOUSE	Isoform 2 of Protein SMG7 OS=Mus musculus GN=Smg7	2.862	3.165e-37	507789	1.44089e+06
PRDX1_MOUSE	Peroxiredoxin-1 OS=Mus musculus GN=Prdx1 PE=1 SV=1	2.851	5.504e-17	2062914	5.24827e+06
COPB_MOUSE	Coatomer subunit beta OS=Mus musculus GN=Copb1 PE=1 SV=1	2.85	0	831388	2.36069e+06
SYHC_MOUSE	Histidyl-tRNA synthetase, cytoplasmic OS=Mus musculus GN=Hars PE=2 SV=1	2.845	0.002	316382	922173
PTN23_MOUSE	Tyrosine-protein phosphatase non-receptor type 23 OS=Mus musculus GN=Ptpn23 PE=1 SV=2	2.829	8.57e-17	1.77571e+06	4.89684e+06
BMP2K_MOUSE	BMP-2-inducible protein kinase OS=Mus musculus GN=Bmp2k PE=1 SV=1	2.823	6.782e-20	1.32906e+06	3.75213e+06
FPPS_MOUSE	Farnesyl pyrophosphate synthase OS=Mus musculus GN=Fdps PE=2 SV=1	2.818	1.248e-06	1.19721e+06	2.25371e+06
ASNS_MOUSE	Asparagine synthetase [glutamine-hydrolyzing] OS=Mus musculus GN=Asns PE=2 SV=3	2.807	1.842e-08	170841	516835
PICA_MOUSE	Isoform 6 of Phosphatidylinositol-binding clathrin assembly protein OS=Mus musculus GN=Picalm	2.805	0	1.23441e+06	3463372
PDLI5_MOUSE	PDZ and LIM domain protein 5 OS=Mus musculus GN=Pdlim5 PE=1 SV=3	2.804	0	5144800	14691904
TNPO2_MOUSE	Transportin-2 OS=Mus musculus GN=Tnpo2 PE=2 SV=1	2.795	0	1521910	4027445
SCFD2_MOUSE	Isoform 2 of Sec1 family domain-containing protein 2 OS=Mus musculus GN=Scfd2	2.775	2.686e-12	386872	1.07361e+06
THIO_MOUSE	Thioredoxin OS=Mus musculus GN=Txn PE=1 SV=3	2.774	0	4.04455e+06	11272558
SYWC_MOUSE	Tryptophanyl-tRNA synthetase, cytoplasmic OS=Mus musculus GN=Wars PE=1 SV=2	2.774	0	1.01923e+06	2.82697e+06
CSN4_MOUSE	COP9 signalosome complex subunit 4 OS=Mus musculus GN=Cops4 PE=1 SV=1	2.769	1.215e-16	321433	897716
HS90B_MOUSE	Heat shock protein HSP 90-beta OS=Mus musculus GN=Hsp90ab1 PE=1 SV=2	2.768	3.59e-06	2.30492e+06	6.65399e+06
KAD2_MOUSE	Adenylate kinase 2, mitochondrial OS=Mus musculus GN=Ak2 PE=1 SV=5	2.762	0	2369921	6552046
NDKA_MOUSE	Nucleoside diphosphate kinase A OS=Mus musculus GN=Nme1 PE=1 SV=1	2.76	1.648e-28	542485	1.49738e+06
IPO9_MOUSE	Importin-9 OS=Mus musculus GN=Ipo9 PE=1 SV=3	2.76	1.338e-08	533369	1.37485e+06
PPIA_MOUSE	Peptidyl-prolyl cis-trans isomerase A OS=Mus musculus GN=Ppia PE=1 SV=2	2.749	0	4.2257e+06	11734936
HIRP3_MOUSE	HIRA-interacting protein 3 OS=Mus musculus GN=Hirip3 PE=1 SV=1	2.748	1.951e-10	140779	386980
RENT1_MOUSE	Regulator of nonsense transcripts 1 OS=Mus musculus GN=Upf1 PE=1 SV=2	2.735	0	822146	2.24863e+06
SYSC_MOUSE	Seryl-tRNA synthetase, cytoplasmic OS=Mus musculus GN=Sars PE=2 SV=3	2.735	0	564467	1.54196e+06
IF5_MOUSE	Eukaryotic translation initiation factor 5 OS=Mus musculus GN=Eif5 PE=1 SV=1	2.728	6.21e-08	223827	610801
XPO5_MOUSE	Exportin-5 OS=Mus musculus GN=Xpo5 PE=2 SV=1	2.725	4.044e-07	171886	468904
ANR17_MOUSE	Ankyrin repeat domain-containing protein 17 OS=Mus musculus GN=Ankrd17 PE=1 SV=2	2.718	0	2.10674e+06	5747237
KC1A_MOUSE	Casein kinase I isoform alpha OS=Mus musculus GN=Csnk1a1 PE=2 SV=2	2.705	1.387e-05	461807	1.25146e+06
SYIC_MOUSE	Isoleucyl-tRNA synthetase, cytoplasmic OS=Mus musculus GN=Iars PE=2 SV=1	2.702	8.402e-29	1.24522e+06	3.26691e+06
AIMP2_MOUSE	Aminoacyl tRNA synthase complex-interacting multifunctional protein 2 OS=Mus musculus GN=Aimp2 PE=1 SV=1	2.696	3.036e-15	320921	865503
PRD16_MOUSE	Isoform 2 of PR domain zinc finger protein 16 OS=Mus musculus GN=Prdm16	2.685	0	3.43548e+06	9222860
AL9A1_MOUSE	4-trimethylaminobutyraldehyde dehydrogenase OS=Mus musculus GN=Aldh9a1 PE=1 SV=1	2.681	0	2.56709e+06	6.69716e+06
COF1_MOUSE	Cofilin-1 OS=Mus musculus GN=Cfl1 PE=1 SV=3	2.679	1.521e-22	2.56678e+06	6831224
TCTP_MOUSE	Translationally-controlled tumor protein OS=Mus musculus GN=Tpt1 PE=1 SV=1	2.673	0	6149318	16433034
ARBK2_MOUSE	Beta-adrenergic receptor kinase 1 OS=Mus musculus GN=Adrbk1 PE=2 SV=2	2.672	1.273e-06	406979	1.08586e+06
EIF3H_MOUSE	Eukaryotic translation initiation factor 3 subunit H OS=Mus musculus GN=Eif3h PE=1 SV=1	2.669	1.44e-21	2.18374e+06	5.82457e+06
FRIH_MOUSE	Ferritin heavy chain OS=Mus musculus GN=Fth1 PE=1 SV=2	2.666	0	6497777	17263410
IDE_MOUSE	Insulin-degrading enzyme OS=Mus musculus GN=Ide PE=2 SV=1	2.665	5.845e-25	1.29481e+06	3.6519e+06
TNPO3_MOUSE	Transportin-3 OS=Mus musculus GN=Tnpo3 PE=1 SV=1	2.653	1.697e-07	168381	447095
LRC40_MOUSE	Leucine-rich repeat-containing protein 40 OS=Mus musculus GN=Lrrc40 PE=2 SV=2	2.643	6.111e-20	125843	332459
ANM5_MOUSE	Protein arginine N-methyltransferase 5 OS=Mus musculus GN=Prmt5 PE=1 SV=3	2.64	9.307e-18	715070	1.89061e+06
DCP1A_MOUSE	mRNA-decapping enzyme 1A OS=Mus musculus GN=Dcp1a PE=1 SV=1	2.638	2.86e-16	509888	1.34508e+06
1433E_MOUSE	14-3-3 protein epsilon - Mus musculus (Mouse)	2.607	1.121e-11	601980	1546379
AP2B1_MOUSE	AP-2 complex subunit beta OS=Mus musculus GN=Ap2b1 PE=1 SV=1	2.605	2.751e-10	1.3271e+06	3.35766e+06
RRBP1_MOUSE	Ribosome-binding protein 1 OS=Mus musculus GN=Rrbp1 PE=2 SV=2	2.597	0.0002518	149001	387165
SMAP1_MOUSE	Stromal membrane-associated protein 1 OS=Mus musculus GN=Smap1 PE=1 SV=1	2.595	0	3.73983e+06	9705980
UNKL_MOUSE	RING finger protein unkempt-like OS=Mus musculus GN=Unkl PE=2 SV=2	2.592	4.612e-06	184477	478794
ITSN2_MOUSE	Intersectin-2 OS=Mus musculus GN=Itsn2 PE=1 SV=2	2.591	3.979e-23	575583	1.48888e+06
DRG1_MOUSE	Developmentally-regulated GTP-binding protein 1 OS=Mus musculus GN=Drg1 PE=1 SV=1	2.59	6.594e-27	682415	1766725
MOES_MOUSE	Moesin OS=Mus musculus GN=Msn PE=1 SV=3	2.587	3.022e-13	559295	1.47069e+06
TTI1_MOUSE	TEL2-interacting protein 1 homolog OS=Mus musculus GN=Tti1 PE=1 SV=1	2.587	1.854e-05	65649.4	169851
ABCF2_MOUSE	ATP-binding cassette sub-family F member 2 OS=Mus musculus GN=Abcf2 PE=2 SV=1	2.573	0	1.2027e+06	3.03044e+06
IPO7_MOUSE	Importin-7 OS=Mus musculus GN=Ipo7 PE=1 SV=2	2.573	1.615e-09	607409	1.43736e+06
RL32_MOUSE	60S ribosomal protein L32 OS=Mus musculus GN=Rpl32 PE=2 SV=2	2.564	1.662e-27	2.31963e+06	5678078
RL38_MOUSE	60S ribosomal protein L38 OS=Mus musculus GN=Rpl38 PE=2 SV=3	2.558	3.209e-21	499115	1.27752e+06
PABP1_MOUSE	Polyadenylate-binding protein 1 OS=Mus musculus GN=Pabpc1 PE=1 SV=1	2.54	1.401e-43	1.51058e+06	3.96868e+06
RM38_MOUSE	39S ribosomal protein L38, mitochondrial OS=Mus musculus GN=Mrpl38 PE=2 SV=2	2.539	1.401e-25	2.61215e+06	6649469
SYFA_MOUSE	Phenylalanyl-tRNA synthetase alpha chain OS=Mus musculus GN=Farsa PE=2 SV=1	2.527	2.045e-33	749030	1.8931e+06
CAND1_MOUSE	Cullin-associated NEDD8-dissociated protein 1 OS=Mus musculus GN=Cand1 PE=2 SV=2	2.527	4.359e-38	2.13731e+06	5.0342e+06
ACTS_MOUSE	Actin, alpha cardiac muscle 1 OS=Mus musculus GN=Actc1 PE=1 SV=1	2.51	0	36468408	89347968
PDC6I_MOUSE	Isoform 3 of Programmed cell death 6-interacting protein OS=Mus musculus GN=Pdcd6ip	2.505	1.592e-19	407849	1.01811e+06
PSMD1_MOUSE	26S proteasome non-ATPase regulatory subunit 1 OS=Mus musculus GN=Psmd1 PE=1 SV=1	2.505	3.599e-33	711785	1.78293e+06
S30BP_MOUSE	SAP30-binding protein OS=Mus musculus GN=Sap30bp PE=2 SV=2	2.5	0	5175222	12938594
UBP7_MOUSE	Isoform 2 of Ubiquitin carboxyl-terminal hydrolase 7 OS=Mus musculus GN=Usp7	2.488	1.085e-05	140979	351145
MOV10_MOUSE	Putative helicase MOV-10 OS=Mus musculus GN=Mov10 PE=1 SV=2	2.481	0.0001256	306395	762618
KDM1A_MOUSE	Lysine-specific histone demethylase 1A OS=Mus musculus GN=Kdm1a PE=1 SV=2	2.462	3.874e-06	133083	327467
RL37A_MOUSE	60S ribosomal protein L37a OS=Mus musculus GN=Rpl37a PE=2 SV=2	2.46	3.303e-19	1.91888e+06	4728006
SH3L1_MOUSE	SH3 domain-binding glutamic acid-rich-like protein OS=Mus musculus GN=Sh3bgrl PE=2 SV=1	2.445	9.79e-07	80165	196020
FRIL1_MOUSE	Ferritin light chain 1 OS=Mus musculus GN=Ftl1 PE=1 SV=2	2.44	0	13055980	31780262
FANCI_MOUSE	Fanconi anemia group I protein homolog OS=Mus musculus GN=Fanci PE=1 SV=2	2.435	3.266e-22	1.42508e+06	3.55375e+06
VPS35_MOUSE	Vacuolar protein sorting-associated protein 35 OS=Mus musculus GN=Vps35 PE=1 SV=1	2.412	0	1.43785e+06	3.57789e+06
NMT1_MOUSE	Glycylpeptide N-tetradecanoyltransferase 1 OS=Mus musculus GN=Nmt1 PE=1 SV=1	2.411	5.665e-30	1.89822e+06	4.70611e+06
ATX2L_MOUSE	Isoform 2 of Ataxin-2-like protein OS=Mus musculus GN=Atxn2l	2.408	3.653e-33	1.79294e+06	4550682
RS15A_MOUSE	40S ribosomal protein S15a OS=Mus musculus GN=Rps15a PE=2 SV=2	2.397	6.078e-16	4.12325e+06	9499004
TCPE_MOUSE	T-complex protein 1 subunit epsilon OS=Mus musculus GN=Cct5 PE=1 SV=1	2.396	1.827e-09	876522	2222255
GPX42_MOUSE	Isoform Cytoplasmic of Phospholipid hydroperoxide glutathione peroxidase, mitochondrial OS=Mus musculus GN=Gpx4	2.39	4.069e-11	1.49562e+06	3.42001e+06
ACTN1_MOUSE	Alpha-actinin-1 OS=Mus musculus GN=Actn1 PE=2 SV=1	2.383	1.333e-39	1.33642e+06	3.34456e+06
ACTG_MOUSE	Actin, cytoplasmic 1 OS=Mus musculus GN=Actb PE=1 SV=1	2.381	0	14238560	34051728
ARC1B_MOUSE	Actin-related protein 2/3 complex subunit 1B OS=Mus musculus GN=Arpc1b PE=1 SV=3	2.379	2.592e-41	3202127	7.44452e+06
PRDX2_MOUSE	Peroxiredoxin-2 OS=Mus musculus GN=Prdx2 PE=1 SV=3	2.374	0.007	500608	1.1623e+06
PKHA2_MOUSE	Pleckstrin homology domain-containing family A member 2 OS=Mus musculus GN=Plekha2 PE=1 SV=1	2.37	1.057e-38	1.21041e+06	2821387
CTC1_MOUSE	CST complex subunit CTC1 OS=Mus musculus GN=Ctc1 PE=1 SV=2	2.368	0.0006334	162869	383385
BGLR_MOUSE	Beta-glucuronidase OS=Mus musculus GN=Gusb PE=2 SV=1	2.366	9.193e-06	1.47969e+06	3.26831e+06
RS7_MOUSE	40S ribosomal protein S7 OS=Mus musculus GN=Rps7 PE=2 SV=1	2.364	0.001	157118	372225
RS10_MOUSE	40S ribosomal protein S10 OS=Mus musculus GN=Rps10 PE=1 SV=1	2.358	0	1.18657e+06	2797778
NEDD1_MOUSE	Protein NEDD1 OS=Mus musculus GN=Nedd1 PE=2 SV=2	2.358	1.661e-09	196298	462953
CABL1_MOUSE	CDK5 and ABL1 enzyme substrate 1 OS=Mus musculus GN=Cables1 PE=1 SV=1	2.357	0	25349272	59784468
UBP2L_MOUSE	Ubiquitin-associated protein 2-like OS=Mus musculus GN=Ubap2l PE=1 SV=1	2.346	0	7.28584e+06	16873278
PP2BA_MOUSE	Serine/threonine-protein phosphatase 2B catalytic subunit alpha isoform OS=Mus musculus GN=Ppp3ca PE=1 SV=1	2.34	0	2.43679e+06	5700907
ABCE1_MOUSE	ATP-binding cassette sub-family E member 1 OS=Mus musculus GN=Abce1 PE=2 SV=1	2.335	0	1586560	3703814
DYHC1_MOUSE	Cytoplasmic dynein 1 heavy chain 1 OS=Mus musculus GN=Dync1h1 PE=1 SV=1	2.325	2.515e-09	247422	581401
GALT6_MOUSE	Polypeptide N-acetylgalactosaminyltransferase 6 OS=Mus musculus GN=Galnt6 PE=2 SV=1	2.324	6.365e-19	2.26615e+06	5265336
IF4A1_MOUSE	Eukaryotic initiation factor 4A-I OS=Mus musculus GN=Eif4a1 PE=2 SV=1	2.321	1.232e-17	3.55136e+06	8101315
SRP68_MOUSE	Signal recognition particle 68 kDa protein OS=Mus musculus GN=Srp68 PE=2 SV=1	2.318	0	1.45008e+06	3.42398e+06
GLOD4_MOUSE	Isoform 2 of Glyoxalase domain-containing protein 4 OS=Mus musculus GN=Glod4	2.316	6.319e-06	1.39577e+06	3.17779e+06
SPNS3_MOUSE	Protein spinster homolog 3 OS=Mus musculus GN=Spns3 PE=2 SV=1	2.31	0.003	120615	278514
RL37_MOUSE	60S ribosomal protein L37 OS=Mus musculus GN=Rpl37 PE=2 SV=3	2.297	2.511e-05	3.19393e+06	6499551
SYTC_MOUSE	Threonyl-tRNA synthetase, cytoplasmic OS=Mus musculus GN=Tars PE=1 SV=2	2.293	0	1485300	3.34053e+06
UBAP2_MOUSE	Ubiquitin-associated protein 2 OS=Mus musculus GN=Ubap2 PE=2 SV=1	2.286	8.119e-39	9307172	21018174
NOTC2_MOUSE	Neurogenic locus notch homolog protein 2 OS=Mus musculus GN=Notch2 PE=1 SV=1	2.278	0.0001226	673039	1.5442e+06
RS20_MOUSE	40S ribosomal protein S20 OS=Mus musculus GN=Rps20 PE=1 SV=1	2.277	0	3.30043e+06	7.48633e+06
MFTC_MOUSE	Mitochondrial folate transporter/carrier OS=Mus musculus GN=Slc25a32 PE=2 SV=1	2.275	0.024	54071.4	123117
EIF2A_MOUSE	Eukaryotic translation initiation factor 2A OS=Mus musculus GN=Eif2a PE=2 SV=2	2.27	0	1.32223e+06	3.00179e+06
TNPO1_MOUSE	Transportin-1 OS=Mus musculus GN=Tnpo1 PE=1 SV=2	2.268	1.603e-24	2.15663e+06	4820478
RLA1_MOUSE	60S acidic ribosomal protein P1 OS=Mus musculus GN=Rplp1 PE=1 SV=1	2.268	0	2.26652e+06	5143944
REL_MOUSE	Proto-oncogene c-Rel OS=Mus musculus GN=Rel PE=1 SV=2	2.267	0.01	833873	1.92645e+06
ARNT_MOUSE	Aryl hydrocarbon receptor nuclear translocator OS=Mus musculus GN=Arnt PE=1 SV=2	2.261	5.405e-29	823956	1.8621e+06
PAIRB_MOUSE	Isoform 2 of Plasminogen activator inhibitor 1 RNA-binding protein OS=Mus musculus GN=Serbp1	2.258	5.094e-18	369215	833640
PA2G4_MOUSE	Proliferation-associated protein 2G4 OS=Mus musculus GN=Pa2g4 PE=1 SV=3	2.255	0	3.88672e+06	8594208
HSP7C_MOUSE	Heat shock cognate 71 kDa protein OS=Mus musculus GN=Hspa8 PE=1 SV=1	2.251	4.409e-29	5942160	13120614
ZW10_MOUSE	Centromere/kinetochore protein zw10 homolog OS=Mus musculus GN=Zw10 PE=2 SV=3	2.244	2.154e-22	343670	759207
CBLN4_MOUSE	Cerebellin-4 OS=Mus musculus GN=Cbln4 PE=1 SV=1	2.242	0	25808392	57878296
DNJA1_MOUSE	DnaJ homolog subfamily A member 1 OS=Mus musculus GN=Dnaja1 PE=1 SV=1	2.24	1.244e-23	867438	1.97723e+06
AP2A1_MOUSE	Isoform B of AP-2 complex subunit alpha-1 OS=Mus musculus GN=Ap2a1	2.231	2.527e-23	636861	1.41553e+06
YTHD3_MOUSE	Isoform 2 of YTH domain family protein 3 OS=Mus musculus GN=Ythdf3	2.224	2.57e-26	1.54267e+06	3419189
RS2_MOUSE	40S ribosomal protein S2 OS=Mus musculus GN=Rps2 PE=1 SV=3	2.214	0	3.95092e+06	9007802
TBA8_MOUSE	Tubulin alpha-8 chain OS=Mus musculus GN=Tuba8 PE=1 SV=1	2.213	4.553e-19	1.83565e+06	4.06779e+06
NAA15_MOUSE	N-alpha-acetyltransferase 15, NatA auxiliary subunit OS=Mus musculus GN=Naa15 PE=1 SV=1	2.209	8.686e-21	1.52885e+06	3.4682e+06
CNBP_MOUSE	Isoform 2 of Cellular nucleic acid-binding protein OS=Mus musculus GN=Cnbp	2.209	0	6.06146e+06	13440445
NAA25_MOUSE	N-alpha-acetyltransferase 25, NatB auxiliary subunit OS=Mus musculus GN=Naa25 PE=1 SV=1	2.204	2.431e-09	186443	426130
ARHG1_MOUSE	Isoform 2 of Rho guanine nucleotide exchange factor 1 OS=Mus musculus GN=Arhgef1	2.199	0.281	30547.8	68592.8
CLH_MOUSE	Clathrin heavy chain 1 OS=Mus musculus GN=Cltc PE=1 SV=3	2.195	0.000147	2.07336e+06	5288039
TOE1_MOUSE	Target of EGR1 protein 1 OS=Mus musculus GN=Toe1 PE=2 SV=1	2.195	6.008e-07	106249	231696
PLK1_MOUSE	Serine/threonine-protein kinase PLK1 OS=Mus musculus GN=Plk1 PE=1 SV=2	2.195	0.082	149526	338440
TM186_MOUSE	Transmembrane protein 186 OS=Mus musculus GN=Tmem186 PE=2 SV=2	2.193	2.606e-05	320334	702268
MIA3_MOUSE	Melanoma inhibitory activity protein 3 OS=Mus musculus GN=Mia3 PE=1 SV=2	2.193	0.0001536	649181	1.42583e+06
ATLA2_MOUSE	Atlastin-2 OS=Mus musculus GN=Atl2 PE=1 SV=1	2.187	6.687e-35	221226	485360
WDHD1_MOUSE	WD repeat and HMG-box DNA-binding protein 1 OS=Mus musculus GN=Wdhd1 PE=1 SV=2	2.186	1.746e-35	1.29776e+06	2836637
ENASE_MOUSE	Cytosolic endo-beta-N-acetylglucosaminidase OS=Mus musculus GN=Engase PE=2 SV=1	2.182	0.011	156030	341016
RS11_MOUSE	40S ribosomal protein S11 OS=Mus musculus GN=Rps11 PE=2 SV=3	2.181	0	3.91766e+06	8.37972e+06
IF5A1_MOUSE	Eukaryotic translation initiation factor 5A-1 OS=Mus musculus GN=Eif5a PE=1 SV=2	2.18	2.56e-26	2.58259e+06	5494265
SPTB2_MOUSE	Spectrin beta chain, brain 1 OS=Mus musculus GN=Sptbn1 PE=1 SV=2	2.179	2.5e-15	1.26615e+06	2.76011e+06
PSD11_MOUSE	26S proteasome non-ATPase regulatory subunit 11 OS=Mus musculus GN=Psmd11 PE=1 SV=3	2.176	1.282e-22	510079	1.10978e+06
AP2M1_MOUSE	AP-2 complex subunit mu OS=Mus musculus GN=Ap2m1 PE=1 SV=1	2.173	1.914e-10	1.7711e+06	3.86634e+06
RS27_MOUSE	40S ribosomal protein S27 OS=Mus musculus GN=Rps27 PE=1 SV=3	2.171	0	16971404	36871128
RS6_MOUSE	40S ribosomal protein S6 OS=Mus musculus GN=Rps6 PE=1 SV=1	2.171	0	8.37491e+06	18040674
LKHA4_MOUSE	Leukotriene A-4 hydrolase OS=Mus musculus GN=Lta4h PE=1 SV=3	2.169	3.426e-22	1025460	2.18717e+06
ARK72_MOUSE	Aflatoxin B1 aldehyde reductase member 2 OS=Mus musculus GN=Akr7a2 PE=1 SV=2	2.164	2.119e-12	498193	1078027
RS3_MOUSE	40S ribosomal protein S3 OS=Mus musculus GN=Rps3 PE=1 SV=1	2.163	5.91e-10	3.3702e+06	6.27029e+06
COJA1_MOUSE	Collagen alpha-1(XIX) chain OS=Mus musculus GN=Col19a1 PE=2 SV=2	2.16	0	8143884	17596624
NDUS5_MOUSE	NADH dehydrogenase [ubiquinone] iron-sulfur protein 5 OS=Mus musculus GN=Ndufs5 PE=1 SV=3	2.16	4.658e-13	1407772	3.0425e+06
RS30_MOUSE	40S ribosomal protein S30 OS=Mus spicilegus GN=Fau PE=3 SV=1	2.157	9.108e-18	1.72047e+06	3.71279e+06
RS16_MOUSE	40S ribosomal protein S16 OS=Mus musculus GN=Rps16 PE=2 SV=4	2.156	5.269e-43	2912238	6405237
RS23_MOUSE	40S ribosomal protein S23 OS=Mus musculus GN=Rps23 PE=2 SV=3	2.153	6.868e-37	5754337	12575410
AP2A2_MOUSE	AP-2 complex subunit alpha-2 OS=Mus musculus GN=Ap2a2 PE=1 SV=1	2.15	1.827e-05	246929	602933
YTHD1_MOUSE	YTH domain family protein 1 OS=Mus musculus GN=Ythdf1 PE=2 SV=1	2.148	1.192e-14	2.8217e+06	5.55252e+06
RL22_MOUSE	60S ribosomal protein L22 OS=Mus musculus GN=Rpl22 PE=2 SV=2	2.147	0	3244066	6.91393e+06
RAC2_MOUSE	Ras-related C3 botulinum toxin substrate 2 OS=Mus musculus GN=Rac2 PE=2 SV=1	2.141	1.64e-43	3.90031e+06	8.3393e+06
ESTD_MOUSE	S-formylglutathione hydrolase OS=Mus musculus GN=Esd PE=2 SV=1	2.141	0.043	1.35234e+06	3142390
RSH3A_MOUSE	Radial spoke head protein 3 homolog B OS=Mus musculus GN=Rsph3b PE=2 SV=1	2.139	0	746215	1.65373e+06
ANK2_MOUSE	Isoform 2 of Ankyrin-2 OS=Mus musculus GN=Ank2	2.138	0.0005392	133232	317771
EDC3_MOUSE	Enhancer of mRNA-decapping protein 3 OS=Mus musculus GN=Edc3 PE=1 SV=1	2.138	0.000738	192871	412196
MTL13_MOUSE	Methyltransferase-like protein 13 OS=Mus musculus GN=Mettl13 PE=1 SV=1	2.129	0.0008337	157339	334800
SYDC_MOUSE	Aspartyl-tRNA synthetase, cytoplasmic OS=Mus musculus GN=Dars PE=2 SV=1	2.126	3.847e-08	2.51866e+06	5046816
IQEC3_MOUSE	IQ motif and SEC7 domain-containing protein 3 OS=Mus musculus GN=Iqsec3 PE=1 SV=1	2.119	2.273e-05	201896	428684
PRC2C_MOUSE	Isoform 2 of Protein PRRC2C OS=Mus musculus GN=Prrc2c	2.115	0	5.72226e+06	11947261
PCNA_MOUSE	Proliferating cell nuclear antigen OS=Mus musculus GN=Pcna PE=1 SV=2	2.114	6.806e-10	3353699	7.23838e+06
WWP2_MOUSE	NEDD4-like E3 ubiquitin-protein ligase WWP2 OS=Mus musculus GN=Wwp2 PE=1 SV=1	2.111	0.004	51328.8	108377
RL10_MOUSE	60S ribosomal protein L10 OS=Mus musculus GN=Rpl10 PE=2 SV=3	2.11	0	13752751	29134556
IF4H_MOUSE	Eukaryotic translation initiation factor 4H OS=Mus musculus GN=Eif4h PE=1 SV=3	2.108	1.832e-07	222206	468339
RL36A_MOUSE	60S ribosomal protein L36a OS=Mus musculus GN=Rpl36a PE=3 SV=2	2.105	0	6310590	12852568
CSK21_MOUSE	Casein kinase II subunit alpha OS=Mus musculus GN=Csnk2a1 PE=2 SV=1	2.105	3.338e-33	4060082	8484913
SLAP2_MOUSE	Src-like-adapter 2 OS=Mus musculus GN=Sla2 PE=1 SV=3	2.103	3.169e-13	322275	677817
ARPC4_MOUSE	Actin-related protein 2/3 complex subunit 4 OS=Mus musculus GN=Arpc4 PE=1 SV=3	2.101	5.281e-35	1.62345e+06	3.4899e+06
DPOLA_MOUSE	DNA polymerase alpha catalytic subunit OS=Mus musculus GN=Pola1 PE=1 SV=2	2.098	4.075e-12	1853661	3.90001e+06
TERA_MOUSE	Transitional endoplasmic reticulum ATPase OS=Mus musculus GN=Vcp PE=1 SV=4	2.092	7.67e-22	1.5791e+06	3.39299e+06
CKLF7_MOUSE	CKLF-like MARVEL transmembrane domain-containing protein 7 OS=Mus musculus GN=Cmtm7 PE=2 SV=1	2.089	4.008e-09	1.10971e+06	2.07235e+06
RL12_MOUSE	60S ribosomal protein L12 OS=Mus musculus GN=Rpl12 PE=1 SV=2	2.088	0	4454381	8758095
RS5_MOUSE	40S ribosomal protein S5 OS=Mus musculus GN=Rps5 PE=2 SV=3	2.084	1.59e-18	3.81419e+06	7.83448e+06
HS105_MOUSE	Heat shock protein 105 kDa OS=Mus musculus GN=Hsph1 PE=1 SV=2	2.083	1.638e-11	1.20103e+06	2.47586e+06
COPA_MOUSE	Coatomer subunit alpha OS=Mus musculus GN=Copa PE=1 SV=1	2.082	0	1.99011e+06	4.16539e+06
PRI2_MOUSE	DNA primase large subunit OS=Mus musculus GN=Prim2 PE=1 SV=1	2.081	7.162e-14	366557	762804
COPG_MOUSE	Coatomer subunit gamma OS=Mus musculus GN=Copg PE=2 SV=1	2.078	0.014	1.48037e+06	2.11719e+06
CDK1_MOUSE	Cyclin-dependent kinase 1 OS=Mus musculus GN=Cdk1 PE=1 SV=3	2.077	1.871e-07	811837	1.56515e+06
TR112_MOUSE	tRNA methyltransferase 112 homolog OS=Mus musculus GN=Trmt112 PE=2 SV=1	2.076	7.762e-07	455850	948330
GBLP_MOUSE	Guanine nucleotide-binding protein subunit beta-2-like 1 OS=Mus musculus GN=Gnb2l1 PE=1 SV=3	2.076	0	8179347	17262082
CNOT1_MOUSE	Isoform 2 of CCR4-NOT transcription complex subunit 1 OS=Mus musculus GN=Cnot1	2.074	4.652e-31	2.15795e+06	4.01015e+06
RS12_MOUSE	40S ribosomal protein S12 OS=Mus musculus GN=Rps12 PE=1 SV=2	2.073	0	3.731e+06	7.70158e+06
RS14_MOUSE	40S ribosomal protein S14 OS=Mus musculus GN=Rps14 PE=2 SV=3	2.072	2.602e-37	4761509	9975867
XPO7_MOUSE	Exportin-7 OS=Mus musculus GN=Xpo7 PE=2 SV=3	2.07	1.903e-10	419080	867830
TS101_MOUSE	Tumor susceptibility gene 101 protein OS=Mus musculus GN=Tsg101 PE=1 SV=2	2.063	8.458e-26	517052	1.08596e+06
CNOT2_MOUSE	Isoform 2 of CCR4-NOT transcription complex subunit 2 OS=Mus musculus GN=Cnot2	2.063	0	4275724	8818944
PSB5_MOUSE	Proteasome subunit beta type-5 OS=Mus musculus GN=Psmb5 PE=1 SV=3	2.062	1.092e-32	2.31284e+06	4771958
DPOD1_MOUSE	DNA polymerase delta catalytic subunit OS=Mus musculus GN=Pold1 PE=1 SV=1	2.059	1.687e-12	499295	1.01959e+06
XPO1_MOUSE	Exportin-1 OS=Mus musculus GN=Xpo1 PE=1 SV=1	2.059	6.852e-41	2748061	5.57901e+06
TMX4_MOUSE	Thioredoxin-related transmembrane protein 4 OS=Mus musculus GN=Tmx4 PE=1 SV=2	2.057	8.79e-06	120773	267579
RS4X_MOUSE	40S ribosomal protein S4, X isoform OS=Mus musculus GN=Rps4x PE=2 SV=2	2.056	0	7906331	16533255
AP2S1_MOUSE	AP-2 complex subunit sigma OS=Mus musculus GN=Ap2s1 PE=1 SV=1	2.052	8.381e-13	1.73961e+06	3572220
RL24_MOUSE	60S ribosomal protein L24 OS=Mus musculus GN=Rpl24 PE=2 SV=2	2.05	0	2.1431e+06	4.50706e+06
RL7_MOUSE	60S ribosomal protein L7 OS=Mus musculus GN=Rpl7 PE=2 SV=2	2.049	0	7.99154e+06	15933359
NDUV2_MOUSE	NADH dehydrogenase [ubiquinone] flavoprotein 2, mitochondrial OS=Mus musculus GN=Ndufv2 PE=1 SV=2	2.049	3.508e-13	454309	930795
UB2D2_MOUSE	Ubiquitin-conjugating enzyme E2 D2 OS=Mus musculus GN=Ube2d2 PE=1 SV=1	2.046	1.44e-41	1300527	2.66147e+06
SMAD2_MOUSE	Isoform Short of Mothers against decapentaplegic homolog 2 OS=Mus musculus GN=Smad2	2.043	1.874e-17	368894	757041
RLA0_MOUSE	60S acidic ribosomal protein P0 OS=Mus musculus GN=Rplp0 PE=1 SV=3	2.042	3.806e-26	2.26646e+06	4498997
LMAN1_MOUSE	Protein ERGIC-53 OS=Mus musculus GN=Lman1 PE=2 SV=1	2.039	0.07	1.28193e+06	2594406
AGFG1_MOUSE	Isoform 1 of Arf-GAP domain and FG repeats-containing protein 1 OS=Mus musculus GN=Agfg1	2.038	1.665e-32	3.84923e+06	7.87224e+06
TRA2B_MOUSE	Transformer-2 protein homolog beta OS=Mus musculus GN=Tra2b PE=1 SV=1	2.032	5.616e-15	942972	1.91629e+06
RS8_MOUSE	40S ribosomal protein S8 OS=Mus musculus GN=Rps8 PE=1 SV=2	2.031	0	9492030	19323578
RL13A_MOUSE	60S ribosomal protein L13a OS=Mus musculus GN=Rpl13a PE=1 SV=4	2.03	1.401e-45	5.48653e+06	11001226
SYFB_MOUSE	Phenylalanyl-tRNA synthetase beta chain OS=Mus musculus GN=Farsb PE=2 SV=1	2.029	1.761e-41	997518	2.05802e+06
LRC58_MOUSE	Leucine-rich repeat-containing protein 58 OS=Mus musculus GN=Lrrc58 PE=2 SV=1	2.027	0	10613896	21542862
ZDH13_MOUSE	Palmitoyltransferase ZDHHC13 OS=Mus musculus GN=Zdhhc13 PE=1 SV=2	2.027	6.002e-19	683697	1385926
RL5_MOUSE	60S ribosomal protein L5 OS=Mus musculus GN=Rpl5 PE=1 SV=3	2.025	1.825e-31	6031735	12571703
S61A1_MOUSE	Protein transport protein Sec61 subunit alpha isoform 1 OS=Mus musculus GN=Sec61a1 PE=2 SV=2	2.021	9.076e-12	5218523	10266673
COR1C_MOUSE	Coronin-1C OS=Mus musculus GN=Coro1c PE=1 SV=2	2.021	1.013e-12	1.62098e+06	3.35303e+06
RL17_MOUSE	60S ribosomal protein L17 OS=Mus musculus GN=Rpl17 PE=2 SV=3	2.021	2.795e-28	6796353	13583921
COR1A_MOUSE	Coronin-1A OS=Mus musculus GN=Coro1a PE=1 SV=5	2.019	0	7755775	15613007
RL19_MOUSE	60S ribosomal protein L19 OS=Mus musculus GN=Rpl19 PE=1 SV=1	2.019	0	11820536	24088988
RS25_MOUSE	40S ribosomal protein S25 OS=Mus musculus GN=Rps25 PE=2 SV=1	2.017	0	2899633	5846701
PICA_MOUSE	Isoform 5 of Phosphatidylinositol-binding clathrin assembly protein OS=Mus musculus GN=Picalm	2.016	1.534e-07	3136485	7519395
TXNIP_MOUSE	Thioredoxin-interacting protein OS=Mus musculus GN=Txnip PE=1 SV=1	2.013	1.005e-13	617400	1.25109e+06
HEM6_MOUSE	Coproporphyrinogen-III oxidase, mitochondrial OS=Mus musculus GN=Cpox PE=1 SV=2	2.011	1.288e-07	749821	1.46399e+06
RL11_MOUSE	60S ribosomal protein L11 OS=Mus musculus GN=Rpl11 PE=1 SV=4	2.005	0	6377817	12769473
RL10A_MOUSE	60S ribosomal protein L10a OS=Mus musculus GN=Rpl10a PE=1 SV=3	2	8.93e-42	3.80829e+06	7669393
WAHS7_MOUSE	WASH complex subunit 7 OS=Mus musculus GN=Kiaa1033 PE=2 SV=2	1.998	0.001	642425	1.17772e+06
ARP3_MOUSE	Actin-related protein 3 OS=Mus musculus GN=Actr3 PE=1 SV=3	1.992	5.129e-35	185777	369941
RL15_MOUSE	60S ribosomal protein L15 OS=Mus musculus GN=Rpl15 PE=2 SV=4	1.987	1.158e-09	12971137	26195488
NMT2_MOUSE	Glycylpeptide N-tetradecanoyltransferase 2 OS=Mus musculus GN=Nmt2 PE=1 SV=1	1.986	3.29e-06	327365	650240
IMDH2_MOUSE	Inosine-5'-monophosphate dehydrogenase 2 OS=Mus musculus GN=Impdh2 PE=1 SV=2	1.985	0.003	2.82586e+06	6.42496e+06
RS9_MOUSE	40S ribosomal protein S9 OS=Mus musculus GN=Rps9 PE=2 SV=3	1.983	0	4.42391e+06	8681146
GSH0_MOUSE	Glutamate--cysteine ligase regulatory subunit OS=Mus musculus GN=Gclm PE=2 SV=1	1.979	3.619e-25	2.41223e+06	4772578
PDK1_MOUSE	[Pyruvate dehydrogenase [lipoamide]] kinase isozyme 1, mitochondrial OS=Mus musculus GN=Pdk1 PE=2 SV=1	1.978	8.726e-10	586507	1159289
RAB8B_MOUSE	Ras-related protein Rab-8B OS=Mus musculus GN=Rab8b PE=1 SV=1	1.975	1.207e-13	1.7732e+06	3502391
XPO4_MOUSE	Exportin-4 OS=Mus musculus GN=Xpo4 PE=1 SV=1	1.975	5.82e-16	635121	1.25428e+06
PRDX5_MOUSE	Peroxiredoxin-5, mitochondrial OS=Mus musculus GN=Prdx5 PE=1 SV=2	1.972	0.001	217868	399765
RAC1_MOUSE	Ras-related C3 botulinum toxin substrate 1 OS=Mus musculus GN=Rac1 PE=1 SV=1	1.968	1.06e-26	2.12182e+06	4177722
PUM1_MOUSE	Isoform 3 of Pumilio homolog 1 OS=Mus musculus GN=Pum1	1.965	0	3.00849e+06	6045901
RL6_MOUSE	60S ribosomal protein L6 OS=Mus musculus GN=Rpl6 PE=1 SV=3	1.965	0	8752121	17302858
MYPT1_MOUSE	Protein phosphatase 1 regulatory subunit 12A OS=Mus musculus GN=Ppp1r12a PE=1 SV=2	1.964	6.485e-21	2.08171e+06	4.06695e+06
RS13_MOUSE	40S ribosomal protein S13 OS=Mus musculus GN=Rps13 PE=1 SV=2	1.961	1.049e-34	4.06107e+06	7.70265e+06
RHOG_MOUSE	Rho-related GTP-binding protein RhoG OS=Mus musculus GN=Rhog PE=2 SV=1	1.956	5.975e-25	1054420	2063955
SI1L1_MOUSE	Signal-induced proliferation-associated 1-like protein 1 OS=Mus musculus GN=Sipa1l1 PE=1 SV=2	1.953	0.0006551	356707	731407
BZW2_MUSMM	Basic leucine zipper and W2 domain-containing protein 2 OS=Mus musculus GN=Bzw2 PE=1 SV=1	1.95	4.664e-16	770021	1501925
RL3_MOUSE	60S ribosomal protein L3 OS=Mus musculus GN=Rpl3 PE=2 SV=2	1.95	0	12772078	24972360
RL29_MOUSE	60S ribosomal protein L29 OS=Mus musculus GN=Rpl29 PE=2 SV=2	1.947	0	22670282	45212348
GALT7_MOUSE	N-acetylgalactosaminyltransferase 7 OS=Mus musculus GN=Galnt7 PE=2 SV=2	1.946	9.319e-17	3024242	5.89875e+06
IF2A_MOUSE	Eukaryotic translation initiation factor 2 subunit 1 OS=Mus musculus GN=Eif2s1 PE=1 SV=3	1.944	1.491e-08	2.10419e+06	4.18027e+06
CKP2L_MOUSE	Cytoskeleton-associated protein 2-like OS=Mus musculus GN=Ckap2l PE=2 SV=1	1.944	0.025	67149.2	130554
RNZ2_MOUSE	Zinc phosphodiesterase ELAC protein 2 OS=Mus musculus GN=Elac2 PE=1 SV=1	1.943	6.627e-09	628970	1.19425e+06
RS18_MOUSE	40S ribosomal protein S18 OS=Mus musculus GN=Rps18 PE=2 SV=3	1.943	0.002	753482	1.48879e+06
ITPR3_MOUSE	Inositol 1,4,5-trisphosphate receptor type 3 OS=Mus musculus GN=Itpr3 PE=1 SV=3	1.936	9.374e-28	3109159	6021992
RL27A_MOUSE	60S ribosomal protein L27a OS=Mus musculus GN=Rpl27a PE=2 SV=5	1.927	0	19153028	36733672
NDRG3_MOUSE	Protein NDRG3 OS=Mus musculus GN=Ndrg3 PE=1 SV=1	1.923	5.128e-14	1730057	3331723
EF1A1_MOUSE	Elongation factor 1-alpha 1 OS=Mus musculus GN=Eef1a1 PE=1 SV=3	1.917	0	20745146	39775836
RS3A_MOUSE	40S ribosomal protein S3a OS=Mus musculus GN=Rps3a PE=1 SV=3	1.916	1.407e-06	2508390	5370592
NSUN2_MOUSE	tRNA (cytosine-5-)-methyltransferase NSUN2 OS=Mus musculus GN=Nsun2 PE=1 SV=2	1.913	1.022e-12	779544	1.30237e+06
DEND3_MOUSE	DENN domain-containing protein 3 OS=Mus musculus GN=Dennd3 PE=2 SV=2	1.912	0.012	103727	198331
TRI33_MOUSE	Isoform Beta of E3 ubiquitin-protein ligase TRIM33 OS=Mus musculus GN=Trim33	1.91	3.721e-14	2.43757e+06	4604485
RL21_MOUSE	60S ribosomal protein L21 OS=Mus musculus GN=Rpl21 PE=2 SV=3	1.91	5.712e-27	12706660	23257110
FXL20_MOUSE	Isoform 3 of F-box/LRR-repeat protein 20 OS=Mus musculus GN=Fbxl20	1.907	3.502e-10	270423	540402
IL4RA_MOUSE	Interleukin-4 receptor subunit alpha OS=Mus musculus GN=Il4r PE=1 SV=1	1.902	1.904e-05	63555.8	117895
RL8_MOUSE	60S ribosomal protein L8 OS=Mus musculus GN=Rpl8 PE=2 SV=2	1.902	0	15021277	27580114
RL36_MOUSE	60S ribosomal protein L36 OS=Mus musculus GN=Rpl36 PE=2 SV=2	1.9	8.483e-33	8941036	16998794
RL30_MOUSE	60S ribosomal protein L30 OS=Mus musculus GN=Rpl30 PE=2 SV=2	1.897	3.853e-36	2844210	5394184
I2BPL_MOUSE	Interferon regulatory factor 2-binding protein-like OS=Mus musculus GN=Irf2bpl PE=1 SV=1	1.895	9.532e-21	1.54872e+06	3.02313e+06
RL35A_MOUSE	60S ribosomal protein L35a OS=Mus musculus GN=Rpl35a PE=2 SV=2	1.89	3.484e-06	7.56198e+06	13305759
GALNS_MOUSE	N-acetylgalactosamine-6-sulfatase OS=Mus musculus GN=Galns PE=2 SV=2	1.889	0.02	115168	217603
GCP4_MOUSE	Gamma-tubulin complex component 4 OS=Mus musculus GN=Tubgcp4 PE=2 SV=2	1.888	2.904e-10	775412	1.46329e+06
NPL4_MOUSE	Nuclear protein localization protein 4 homolog OS=Mus musculus GN=Nploc4 PE=1 SV=3	1.886	0.073	218885	412588
SUCA_MOUSE	Succinyl-CoA ligase [GDP-forming] subunit alpha, mitochondrial OS=Mus musculus GN=Suclg1 PE=1 SV=4	1.885	5.251e-10	4261492	6987090
RL7A_MOUSE	60S ribosomal protein L7a OS=Mus musculus GN=Rpl7a PE=2 SV=2	1.885	0	8639372	15880278
SEPT6_MOUSE	Isoform I of Septin-6 OS=Mus musculus GN=Sept6	1.884	1.21e-19	1.46416e+06	2.75879e+06
RTCB_MOUSE	tRNA-splicing ligase RtcB homolog OS=Mus musculus GN=D10Wsu52e PE=2 SV=1	1.883	2.803e-45	1.51382e+06	2843727
EFGM_MOUSE	Elongation factor G, mitochondrial OS=Mus musculus GN=Gfm1 PE=2 SV=1	1.882	2.68e-11	614040	1.12001e+06
RL9_MOUSE	60S ribosomal protein L9 OS=Mus musculus GN=Rpl9 PE=2 SV=2	1.882	1.362e-08	1.99902e+06	3.8133e+06
AMPL_MOUSE	Cytosol aminopeptidase OS=Mus musculus GN=Lap3 PE=1 SV=3	1.878	3.744e-20	1.29652e+06	2.43619e+06
IMA4_MOUSE	Importin subunit alpha-4 OS=Mus musculus GN=Kpna4 PE=2 SV=1	1.874	4.017e-29	2.62753e+06	4799835
XRN1_MOUSE	Isoform 2 of 5'-3' exoribonuclease 1 OS=Mus musculus GN=Xrn1	1.861	0.0002683	254609	473095
CLN5_MOUSE	Ceroid-lipofuscinosis neuronal protein 5 homolog OS=Mus musculus GN=Cln5 PE=2 SV=1	1.86	5.843e-14	614208	1.14255e+06
PDLI7_MOUSE	PDZ and LIM domain protein 7 OS=Mus musculus GN=Pdlim7 PE=2 SV=1	1.859	0	5168565	9718134
CP20A_MOUSE	Cytochrome P450 20A1 OS=Mus musculus GN=Cyp20a1 PE=2 SV=1	1.858	1.629e-13	627703	1.12669e+06
COX5A_MOUSE	Cytochrome c oxidase subunit 5A, mitochondrial OS=Mus musculus GN=Cox5a PE=1 SV=2	1.856	1.899e-05	1.59385e+06	2947029
ZN598_MOUSE	Isoform 3 of Zinc finger protein 598 OS=Mus musculus GN=Znf598	1.856	6.848e-09	759085	1.39646e+06
RL18A_MOUSE	60S ribosomal protein L18a OS=Mus musculus GN=Rpl18a PE=1 SV=1	1.855	0	15154774	28606406
COX5B_MOUSE	Cytochrome c oxidase subunit 5B, mitochondrial OS=Mus musculus GN=Cox5b PE=1 SV=1	1.854	3.399e-23	3.10129e+06	5750664
CPNE2_MOUSE	Copine-2 OS=Mus musculus GN=Cpne2 PE=2 SV=1	1.851	2.473e-06	829493	1.53754e+06
GANAB_MOUSE	Isoform 2 of Neutral alpha-glucosidase AB OS=Mus musculus GN=Ganab	1.847	0	3.22338e+06	5.8197e+06
GSE1_MOUSE	Isoform 2 of Genetic suppressor element 1 OS=Mus musculus GN=Gse1	1.843	5.03e-27	1668390	3.10484e+06
VDAC1_MOUSE	Voltage-dependent anion-selective channel protein 1 OS=Mus musculus GN=Vdac1 PE=1 SV=3	1.84	5.154e-09	1.63771e+06	3012139
MYO1C_MOUSE	Isoform 2 of Myosin-Ic OS=Mus musculus GN=Myo1c	1.84	1.42e-09	977843	1795662
RL18_MOUSE	60S ribosomal protein L18 OS=Mus musculus GN=Rpl18 PE=2 SV=3	1.839	7.646e-34	15633496	28783962
RL13_MOUSE	60S ribosomal protein L13 OS=Mus musculus GN=Rpl13 PE=2 SV=3	1.838	6.109e-14	6485320	11893007
EDC4_MOUSE	Enhancer of mRNA-decapping protein 4 OS=Mus musculus GN=Edc4 PE=1 SV=2	1.838	1.406e-07	328283	603382
RL4_MOUSE	60S ribosomal protein L4 OS=Mus musculus GN=Rpl4 PE=1 SV=3	1.837	0	8288360	15187792
GNAI2_MOUSE	Guanine nucleotide-binding protein G(i) subunit alpha-2 OS=Mus musculus GN=Gnai2 PE=1 SV=4	1.833	2.822e-07	1.95419e+06	3.51693e+06
UBP3_MOUSE	Ubiquitin carboxyl-terminal hydrolase 3 OS=Mus musculus GN=Usp3 PE=2 SV=1	1.831	0.285	262600	357451
CATD_MOUSE	Cathepsin D OS=Mus musculus GN=Ctsd PE=1 SV=1	1.828	5.588e-36	3.81775e+06	6982271
NDUV3_MOUSE	NADH dehydrogenase [ubiquinone] flavoprotein 3, mitochondrial OS=Mus musculus GN=Ndufv3 PE=2 SV=1	1.825	1.419e-05	448745	819591
MPPB_MOUSE	Mitochondrial-processing peptidase subunit beta OS=Mus musculus GN=Pmpcb PE=2 SV=1	1.823	1.27e-15	2.46535e+06	4109253
MYO1G_MOUSE	Unconventional myosin-Ig OS=Mus musculus GN=Myo1g PE=1 SV=1	1.822	2.605e-12	602542	1.06354e+06
RHOA_MOUSE	Transforming protein RhoA OS=Mus musculus GN=Rhoa PE=1 SV=1	1.819	3.724e-05	740508	1346384
FACE1_MOUSE	CAAX prenyl protease 1 homolog OS=Mus musculus GN=Zmpste24 PE=1 SV=2	1.816	2.163e-09	4737661	6.69881e+06
ODB2_MOUSE	Lipoamide acyltransferase component of branched-chain alpha-keto acid dehydrogenase complex, mitochondrial OS=Mus musculus GN=Dbt PE=2 SV=1	1.816	0.0005692	1.21396e+06	1.9387e+06
THS7A_MOUSE	Thrombospondin type-1 domain-containing protein 7A OS=Mus musculus GN=Thsd7a PE=2 SV=2	1.809	1.419e-12	1377480	2.49197e+06
RAB10_MOUSE	Ras-related protein Rab-10 OS=Mus musculus GN=Rab10 PE=1 SV=1	1.809	3.437e-29	3042095	5503495
STRBP_MOUSE	Spermatid perinuclear RNA-binding protein OS=Mus musculus GN=Strbp PE=1 SV=1	1.807	0.0006118	1.49205e+06	2.68661e+06
2AAA_MOUSE	Serine/threonine-protein phosphatase 2A 65 kDa regulatory subunit A alpha isoform OS=Mus musculus GN=Ppp2r1a PE=1 SV=3	1.806	1.28e-20	2.97207e+06	5365265
MTX2_MOUSE	Metaxin-2 OS=Mus musculus GN=Mtx2 PE=1 SV=1	1.805	8.441e-05	233399	421426
TIF1A_MOUSE	Transcription intermediary factor 1-alpha OS=Mus musculus GN=Trim24 PE=1 SV=1	1.803	0.021	485520	881498
PDK3_MOUSE	[Pyruvate dehydrogenase [lipoamide]] kinase isozyme 3, mitochondrial OS=Mus musculus GN=Pdk3 PE=2 SV=1	1.801	0.0002977	1.05679e+06	2.20982e+06
GSHR_MOUSE	Glutathione reductase, mitochondrial OS=Mus musculus GN=Gsr PE=2 SV=3	1.799	0.0007556	3.2192e+06	7060851
CND1_MOUSE	Condensin complex subunit 1 OS=Mus musculus GN=Ncapd2 PE=1 SV=2	1.797	1.56e-19	673805	1216028
PRP17_MOUSE	Pre-mRNA-processing factor 17 OS=Mus musculus GN=Cdc40 PE=1 SV=1	1.797	1.008e-05	730106	1287298
PP2AA_MOUSE	Serine/threonine-protein phosphatase 2A catalytic subunit alpha isoform OS=Mus musculus GN=Ppp2ca PE=1 SV=1	1.791	0	5.35635e+06	9837742
MSH6_MOUSE	DNA mismatch repair protein Msh6 OS=Mus musculus GN=Msh6 PE=1 SV=2	1.79	4.303e-12	1621645	2.80011e+06
NDUV1_MOUSE	NADH dehydrogenase [ubiquinone] flavoprotein 1, mitochondrial OS=Mus musculus GN=Ndufv1 PE=1 SV=1	1.786	0.003	916551	1.63031e+06
2A5G_MOUSE	Isoform 1 of Serine/threonine-protein phosphatase 2A 56 kDa regulatory subunit gamma isoform OS=Mus musculus GN=Ppp2r5c	1.777	0.019	615994	1088747
MINP1_MOUSE	Multiple inositol polyphosphate phosphatase 1 OS=Mus musculus GN=Minpp1 PE=1 SV=2	1.774	0.004	211056	374328
ZC3H4_MOUSE	Zinc finger CCCH domain-containing protein 4 OS=Mus musculus GN=Zc3h4 PE=1 SV=2	1.773	0.004	259674	460291
RL23_MOUSE	60S ribosomal protein L23 OS=Mus musculus GN=Rpl23 PE=1 SV=1	1.773	1.302e-13	4369726	7.85634e+06
ETHE1_MOUSE	Protein ETHE1, mitochondrial OS=Mus musculus GN=Ethe1 PE=1 SV=2	1.772	3.775e-07	894720	1753130
SND1_MOUSE	Staphylococcal nuclease domain-containing protein 1 OS=Mus musculus GN=Snd1 PE=1 SV=1	1.768	9.114e-13	881763	1.50626e+06
OCTC_MOUSE	Peroxisomal carnitine O-octanoyltransferase OS=Mus musculus GN=Crot PE=1 SV=1	1.765	2.998e-06	601127	921734
MMAA_MOUSE	Methylmalonic aciduria type A homolog, mitochondrial OS=Mus musculus GN=Mmaa PE=2 SV=1	1.765	0	7.32429e+06	12927554
ABH15_MOUSE	Abhydrolase domain-containing protein 15 OS=Mus musculus GN=Abhd15 PE=2 SV=1	1.763	0.018	115506	203667
RBM47_MOUSE	RNA-binding protein 47 OS=Mus musculus GN=Rbm47 PE=2 SV=1	1.762	2.213e-05	228549	409850
VRK2_MOUSE	Serine/threonine-protein kinase VRK2 OS=Mus musculus GN=Vrk2 PE=2 SV=2	1.758	6.665e-05	263934	463918
CPSF2_MOUSE	Cleavage and polyadenylation specificity factor subunit 2 OS=Mus musculus GN=Cpsf2 PE=1 SV=1	1.748	5.994e-17	394714	693374
HMGB1_MOUSE	High mobility group protein B1 OS=Mus musculus GN=Hmgb1 PE=1 SV=2	1.748	0	9627738	16570729
SRBP2_MOUSE	Sterol regulatory element-binding protein 2 OS=Mus musculus GN=Srebf2 PE=1 SV=2	1.745	5.78e-06	966612	1.52951e+06
SGPL1_MOUSE	Sphingosine-1-phosphate lyase 1 OS=Mus musculus GN=Sgpl1 PE=2 SV=1	1.745	0.01	316841	551383
VIGLN_MOUSE	Vigilin OS=Mus musculus GN=Hdlbp PE=1 SV=1	1.744	0.0001912	692024	1.20624e+06
DDB1_MOUSE	DNA damage-binding protein 1 OS=Mus musculus GN=Ddb1 PE=1 SV=2	1.743	6.443e-36	2.86235e+06	4966318
ARM10_MOUSE	Armadillo repeat-containing protein 10 OS=Mus musculus GN=Armc10 PE=1 SV=1	1.742	0.008	307527	603855
HNRL1_MOUSE	Heterogeneous nuclear ribonucleoprotein U-like protein 1 OS=Mus musculus GN=Hnrnpul1 PE=1 SV=1	1.741	1.999e-13	3.47177e+06	6433155
OXA1L_MOUSE	Mitochondrial inner membrane protein OXA1L OS=Mus musculus GN=Oxa1l PE=2 SV=1	1.74	4.828e-05	359921	626275
MCAF1_MOUSE	Activating transcription factor 7-interacting protein 1 OS=Mus musculus GN=Atf7ip PE=1 SV=1	1.738	0	3431725	6035112
PCBP1_MOUSE	Poly(rC)-binding protein 1 OS=Mus musculus GN=Pcbp1 PE=1 SV=1	1.732	1.771e-31	6.18761e+06	11030126
MET10_MOUSE	Putative methyltransferase METT10D OS=Mus musculus GN=Mett10d PE=1 SV=1	1.731	8.697e-11	1.03682e+06	1.79569e+06
IMA3_MOUSE	Importin subunit alpha-3 OS=Mus musculus GN=Kpna3 PE=1 SV=1	1.731	4.575e-22	1.34167e+06	2.35718e+06
ACOT9_MOUSE	Acyl-coenzyme A thioesterase 9, mitochondrial OS=Mus musculus GN=Acot9 PE=1 SV=1	1.73	0.0007316	832473	1.32563e+06
RS26_MOUSE	40S ribosomal protein S26 OS=Mus musculus GN=Rps26 PE=2 SV=3	1.727	7.356e-07	8940618	16349163
SYYM_MOUSE	Tyrosyl-tRNA synthetase, mitochondrial OS=Mus musculus GN=Yars2 PE=2 SV=2	1.723	0.0003149	193841	333894
SYIM_MOUSE	Isoleucyl-tRNA synthetase, mitochondrial OS=Mus musculus GN=Iars2 PE=2 SV=1	1.715	1.191e-10	1.20309e+06	2.20469e+06
DCAF7_MOUSE	DDB1- and CUL4-associated factor 7 OS=Mus musculus GN=Dcaf7 PE=2 SV=1	1.714	5.341e-05	530730	908196
IF2H_MOUSE	Eukaryotic translation initiation factor 2 subunit 3, Y-linked OS=Mus musculus GN=Eif2s3y PE=2 SV=2	1.714	4.884e-12	1.16049e+06	2.08773e+06
AP3D1_MOUSE	AP-3 complex subunit delta-1 OS=Mus musculus GN=Ap3d1 PE=1 SV=1	1.711	1.868e-06	283544	485082
IMA1_MOUSE	Importin subunit alpha-1 OS=Mus musculus GN=Kpna1 PE=1 SV=2	1.708	1.293e-05	1.1361e+06	1.9436e+06
SEPT2_MOUSE	Septin-2 OS=Mus musculus GN=Sept2 PE=1 SV=2	1.705	3.552e-20	2.18928e+06	3.77788e+06
M2OM_MOUSE	Mitochondrial 2-oxoglutarate/malate carrier protein OS=Mus musculus GN=Slc25a11 PE=1 SV=3	1.701	1.877e-10	1.02919e+06	1.72155e+06
RL28_MOUSE	60S ribosomal protein L28 OS=Mus musculus GN=Rpl28 PE=1 SV=2	1.701	0.088	12815717	16934020
RAN_MOUSE	GTP-binding nuclear protein Ran OS=Mus musculus GN=Ran PE=1 SV=3	1.689	2.381e-18	9884848	15758995
RL23A_MOUSE	60S ribosomal protein L23a OS=Mus musculus GN=Rpl23a PE=1 SV=1	1.689	7.083e-09	2.45654e+06	4.14909e+06
NELFB_MOUSE	Negative elongation factor B OS=Mus musculus GN=Cobra1 PE=2 SV=2	1.687	0.025	175184	295467
NELFD_MOUSE	Negative elongation factor D OS=Mus musculus GN=Th1l PE=2 SV=2	1.686	0.019	156729	264298
RAB1A_MOUSE	Ras-related protein Rab-1A OS=Mus musculus GN=Rab1A PE=1 SV=3	1.681	2.192e-12	946138	1.59062e+06
EYA3_MOUSE	Eyes absent homolog 3 OS=Mus musculus GN=Eya3 PE=1 SV=1	1.681	0	3.03024e+06	5050618
F120A_MOUSE	Constitutive coactivator of PPAR-gamma-like protein 1 OS=Mus musculus GN=FAM120A PE=1 SV=2	1.68	5.5e-08	721950	1.23164e+06
ARPC2_MOUSE	Actin-related protein 2/3 complex subunit 2 OS=Mus musculus GN=Arpc2 PE=1 SV=3	1.68	1.679e-10	1432891	2.40677e+06
QSOX2_MOUSE	Isoform 2 of Sulfhydryl oxidase 2 OS=Mus musculus GN=Qsox2	1.679	0.002	177212	297501
ADAS_MOUSE	Alkyldihydroxyacetonephosphate synthase, peroxisomal OS=Mus musculus GN=Agps PE=1 SV=1	1.673	2.819e-16	1.03405e+06	1.66917e+06
RL14_MOUSE	60S ribosomal protein L14 OS=Mus musculus GN=Rpl14 PE=2 SV=3	1.67	3.854e-05	4.11808e+06	6.36385e+06
LETM1_MOUSE	LETM1 and EF-hand domain-containing protein 1, mitochondrial OS=Mus musculus GN=Letm1 PE=2 SV=1	1.669	1.011e-08	467426	779990
LIMS1_MOUSE	LIM and senescent cell antigen-like-containing domain protein 1 OS=Mus musculus GN=Lims1 PE=1 SV=3	1.668	3.445e-36	6.35781e+06	9683845
CYFP2_MOUSE	Cytoplasmic FMR1-interacting protein 2 OS=Mus musculus GN=Cyfip2 PE=1 SV=2	1.668	3.19e-20	3.14237e+06	5.31835e+06
LYRIC_MOUSE	Protein LYRIC OS=Mus musculus GN=Mtdh PE=1 SV=1	1.668	0.0002943	394725	692823
DNJC2_MOUSE	DnaJ homolog subfamily C member 2 OS=Mus musculus GN=Dnajc2 PE=1 SV=2	1.663	0.05	187659	311534
CPSF5_MOUSE	Cleavage and polyadenylation specificity factor subunit 5 OS=Mus musculus GN=Nudt21 PE=2 SV=1	1.662	3.507e-05	556414	924865
TSN14_MOUSE	Tetraspanin-14 OS=Mus musculus GN=Tspan14 PE=1 SV=1	1.658	8.269e-09	2.51752e+06	4.17133e+06
DOC11_MOUSE	Dedicator of cytokinesis protein 11 OS=Mus musculus GN=Dock11 PE=1 SV=1	1.654	0.0001295	273074	451567
ISC2A_MOUSE	Isochorismatase domain-containing protein 2A, mitochondrial OS=Mus musculus GN=Isoc2a PE=3 SV=1	1.653	4.071e-07	536810	887450
GNAS1_MOUSE	Isoform Gnas-2 of Guanine nucleotide-binding protein G(s) subunit alpha isoforms short OS=Mus musculus GN=Gnas	1.652	6.788e-06	1.39617e+06	2.30145e+06
STK25_MOUSE	Serine/threonine-protein kinase MST4 OS=Mus musculus GN=Mst4 PE=2 SV=1	1.65	7.83e-06	769901	1.27053e+06
RFA1_MOUSE	Replication protein A 70 kDa DNA-binding subunit OS=Mus musculus GN=Rpa1 PE=2 SV=1	1.649	0.001	419479	691406
TEX2_MOUSE	Testis-expressed sequence 2 protein OS=Mus musculus GN=Tex2 PE=1 SV=2	1.649	8.07e-06	275818	454814
S35B2_MOUSE	Adenosine 3'-phospho 5'-phosphosulfate transporter 1 OS=Mus musculus GN=Slc35b2 PE=2 SV=1	1.647	0.001	1.31289e+06	2.1651e+06
GNAI3_MOUSE	Guanine nucleotide-binding protein G(k) subunit alpha OS=Mus musculus GN=Gnai3 PE=1 SV=3	1.645	8.954e-14	2.08938e+06	3438435
SYVC_MOUSE	Valyl-tRNA synthetase OS=Mus musculus GN=Vars PE=2 SV=1	1.64	2.371e-16	3258778	5433234
THIL_MOUSE	Acetyl-CoA acetyltransferase, mitochondrial OS=Mus musculus GN=Acat1 PE=1 SV=1	1.635	1.453e-27	981372	1614586
RSPRY_MOUSE	RING finger and SPRY domain-containing protein 1 OS=Mus musculus GN=Rspry1 PE=2 SV=1	1.634	0.009	252277	412028
DDX1_MOUSE	ATP-dependent RNA helicase DDX1 OS=Mus musculus GN=Ddx1 PE=1 SV=1	1.634	2.874e-08	1.89922e+06	3.31645e+06
NU1M_MOUSE	NADH-ubiquinone oxidoreductase chain 1 OS=Mus musculus GN=Mtnd1 PE=1 SV=3	1.632	0.12	326128	545454
APOOL_MOUSE	Apolipoprotein O-like OS=Mus musculus GN=Apool PE=2 SV=1	1.631	2.103e-10	759911	1.22691e+06
GGH_MOUSE	Gamma-glutamyl hydrolase OS=Mus musculus GN=Ggh PE=1 SV=1	1.63	3.429e-26	5.75482e+06	9321835
IL3B2_MOUSE	Interleukin-3 receptor class 2 subunit beta OS=Mus musculus GN=Csf2rb2 PE=2 SV=1	1.629	0.0006026	1.06239e+06	1.73217e+06
MOSC2_MOUSE	MOSC domain-containing protein 2, mitochondrial OS=Mus musculus GN=Mosc2 PE=1 SV=1	1.626	2.173e-34	2.13709e+06	3.49661e+06
ERGI2_MOUSE	Endoplasmic reticulum-Golgi intermediate compartment protein 2 OS=Mus musculus GN=Ergic2 PE=2 SV=1	1.625	1.288e-06	557997	906488
STML2_MOUSE	Stomatin-like protein 2 OS=Mus musculus GN=Stoml2 PE=1 SV=1	1.621	9.889e-06	192072	308977
STON2_MOUSE	Stonin-2 OS=Mus musculus GN=Ston2 PE=1 SV=1	1.615	7.569e-05	665168	1.07669e+06
DNLI1_MOUSE	DNA ligase 1 OS=Mus musculus GN=Lig1 PE=1 SV=2	1.612	0	968997	1.54998e+06
AMPM1_MOUSE	Methionine aminopeptidase 1 OS=Mus musculus GN=Metap1 PE=2 SV=1	1.611	9.364e-10	2.69113e+06	4.55882e+06
SODM_MOUSE	Superoxide dismutase [Mn], mitochondrial OS=Mus musculus GN=Sod2 PE=1 SV=3	1.604	1.555e-13	3.55644e+06	5370660
ZN182_MOUSE	Zinc finger protein 182 OS=Mus musculus GN=Znf182 PE=2 SV=1	1.604	1.182e-22	2.17572e+06	3489110
AIFM1_MOUSE	Apoptosis-inducing factor 1, mitochondrial OS=Mus musculus GN=Aifm1 PE=1 SV=1	1.604	0.003	966602	1.55213e+06
RT27_MOUSE	28S ribosomal protein S27, mitochondrial OS=Mus musculus GN=Mrps27 PE=2 SV=1	1.603	0.032	183573	294290
RRP44_MOUSE	Exosome complex exonuclease RRP44 OS=Mus musculus GN=Dis3 PE=2 SV=4	1.602	5.751e-10	477566	773509
D3D2_MOUSE	3,2-trans-enoyl-CoA isomerase, mitochondrial OS=Mus musculus GN=Dci PE=2 SV=1	1.598	4.623e-20	2.31761e+06	3.57731e+06
THIM_MOUSE	3-ketoacyl-CoA thiolase, mitochondrial OS=Mus musculus GN=Acaa2 PE=1 SV=2	1.598	4.846e-16	2154901	3447978
MCAR1_MOUSE	Mitochondrial carrier triple repeat protein 1 OS=Mus musculus GN=Mcart1 PE=2 SV=1	1.595	3.321e-06	353885	564562
C1TC_MOUSE	C-1-tetrahydrofolate synthase, cytoplasmic OS=Mus musculus GN=Mthfd1 PE=1 SV=3	1.595	0.253	3184487	3.72054e+06
RT07_MOUSE	28S ribosomal protein S7, mitochondrial OS=Mus musculus GN=Mrps7 PE=2 SV=1	1.594	0.0001597	443143	706242
GBB2_MOUSE	Guanine nucleotide-binding protein G(I)/G(S)/G(T) subunit beta-2 OS=Mus musculus GN=Gnb2 PE=1 SV=3	1.591	7.759e-07	4.72499e+06	7463988
MAVS_MOUSE	Mitochondrial antiviral-signaling protein OS=Mus musculus GN=Mavs PE=1 SV=1	1.591	5.441e-08	5.65509e+06	8823876
RM09_MOUSE	39S ribosomal protein L9, mitochondrial OS=Mus musculus GN=Mrpl9 PE=2 SV=2	1.591	0.062	777331	1.24611e+06
GCP3_MOUSE	Gamma-tubulin complex component 3 OS=Mus musculus GN=Tubgcp3 PE=2 SV=2	1.59	8.634e-05	771458	1.34648e+06
LIMC1_MOUSE	Isoform 2 of LIM and calponin homology domains-containing protein 1 OS=Mus musculus GN=Limch1	1.583	0.0001097	377454	597549
RT05_MOUSE	28S ribosomal protein S5, mitochondrial OS=Mus musculus GN=Mrps5 PE=2 SV=1	1.58	0.000731	513242	810885
MPPA_MOUSE	Mitochondrial-processing peptidase subunit alpha OS=Mus musculus GN=Pmpca PE=1 SV=1	1.58	3.506e-05	1124725	1.77619e+06
GCSH_MOUSE	Glycine cleavage system H protein, mitochondrial OS=Mus musculus GN=Gcsh PE=1 SV=1	1.577	1.006e-09	1.38016e+06	2.17642e+06
AMPM2_MOUSE	Methionine aminopeptidase 2 OS=Mus musculus GN=Metap2 PE=1 SV=1	1.577	0.011	1.8108e+06	3.03708e+06
SMC2_MOUSE	Structural maintenance of chromosomes protein 2 OS=Mus musculus GN=Smc2 PE=1 SV=1	1.576	8.462e-10	825989	1478922
ILVBL_MOUSE	Isoform 2 of Acetolactate synthase-like protein OS=Mus musculus GN=Ilvbl	1.575	0.033	174573	274916
ATX2_MOUSE	Isoform 2 of Ataxin-2 OS=Mus musculus GN=Atxn2	1.574	0.115	3.23334e+06	3.48754e+06
CMC1_MOUSE	Calcium-binding mitochondrial carrier protein Aralar1 OS=Mus musculus GN=Slc25a12 PE=1 SV=1	1.574	1.563e-14	1.17178e+06	1.87797e+06
DOCK2_MOUSE	Dedicator of cytokinesis protein 2 OS=Mus musculus GN=Dock2 PE=1 SV=2	1.574	6.111e-15	1.14009e+06	1.90477e+06
NU4M_MOUSE	NADH-ubiquinone oxidoreductase chain 4 OS=Mus musculus GN=Mtnd4 PE=1 SV=1	1.573	0.032	463104	727882
DNJC9_MOUSE	DnaJ homolog subfamily C member 9 OS=Mus musculus GN=Dnajc9 PE=2 SV=2	1.568	2.977e-18	1.08941e+06	1.70094e+06
MILK1_MOUSE	MICAL-like protein 1 OS=Mus musculus GN=Micall1 PE=1 SV=2	1.556	2.379e-11	1.45304e+06	2.2611e+06
ETFD_MOUSE	Electron transfer flavoprotein-ubiquinone oxidoreductase, mitochondrial OS=Mus musculus GN=Etfdh PE=1 SV=1	1.554	9.718e-08	2.42624e+06	3795634
ODPB_MOUSE	Pyruvate dehydrogenase E1 component subunit beta, mitochondrial OS=Mus musculus GN=Pdhb PE=1 SV=1	1.553	0.037	1.19071e+06	1.89837e+06
CYC_MOUSE	Cytochrome c, somatic OS=Mus musculus GN=Cycs PE=1 SV=2	1.553	9.083e-05	1.91771e+06	2.95303e+06
KDM5B_MOUSE	Lysine-specific demethylase 5B OS=Mus musculus GN=Kdm5b PE=1 SV=1	1.552	0.095	73857.2	113855
SEPT7_MOUSE	Septin-7 OS=Mus musculus GN=Sept7 PE=1 SV=1	1.551	1.164e-20	2.67805e+06	4.20851e+06
PK3CD_MOUSE	Phosphatidylinositol-4,5-bisphosphate 3-kinase catalytic subunit delta isoform OS=Mus musculus GN=Pik3cd PE=1 SV=1	1.547	0.1	182149	281277
URP2_MOUSE	Fermitin family homolog 3 OS=Mus musculus GN=Fermt3 PE=1 SV=1	1.547	5.365e-32	5.76178e+06	8870135
BCAT2_MOUSE	Branched-chain-amino-acid aminotransferase, mitochondrial OS=Mus musculus GN=Bcat2 PE=2 SV=2	1.546	1.774e-19	2.25205e+06	3.39773e+06
GRP78_MOUSE	78 kDa glucose-regulated protein OS=Mus musculus GN=Hspa5 PE=1 SV=3	1.546	0.006	4300614	6572480
C1TM_MOUSE	Monofunctional C1-tetrahydrofolate synthase, mitochondrial OS=Mus musculus GN=Mthfd1l PE=1 SV=2	1.545	3.152e-24	2.27237e+06	3525299
PRDX3_MOUSE	Thioredoxin-dependent peroxide reductase, mitochondrial OS=Mus musculus GN=Prdx3 PE=1 SV=1	1.542	1.756e-10	4309469	6256576
ETFB_MOUSE	Electron transfer flavoprotein subunit beta OS=Mus musculus GN=Etfb PE=1 SV=3	1.542	1.044e-37	1.93186e+06	3.02642e+06
UCRI_MOUSE	Cytochrome b-c1 complex subunit Rieske, mitochondrial OS=Mus musculus GN=Uqcrfs1 PE=1 SV=1	1.539	0.0005891	2.03027e+06	3.10192e+06
ODP2_MOUSE	Dihydrolipoyllysine-residue acetyltransferase component of pyruvate dehydrogenase complex, mitochondrial OS=Mus musculus GN=Dlat PE=1 SV=2	1.539	4.632e-27	1.3867e+06	2.12233e+06
IPYR2_MOUSE	Inorganic pyrophosphatase 2, mitochondrial OS=Mus musculus GN=Ppa2 PE=2 SV=1	1.538	7.434e-15	1.45031e+06	2.21354e+06
VAPA_MOUSE	Vesicle-associated membrane protein-associated protein A OS=Mus musculus GN=Vapa PE=1 SV=2	1.534	2.29e-07	5.40566e+06	8518119
PHB_MOUSE	Prohibitin OS=Mus musculus GN=Phb PE=1 SV=1	1.534	2.873e-12	2.14255e+06	3361778
SUCB1_MOUSE	Succinyl-CoA ligase [ADP-forming] subunit beta, mitochondrial OS=Mus musculus GN=Sucla2 PE=1 SV=2	1.532	0.197	297143	452650
P5CS_MOUSE	Delta-1-pyrroline-5-carboxylate synthase OS=Mus musculus GN=Aldh18a1 PE=2 SV=1	1.529	4.885e-20	1.71635e+06	2.64899e+06
FUMH_MOUSE	Fumarate hydratase, mitochondrial OS=Mus musculus GN=Fh PE=1 SV=2	1.527	0.002	249943	381730
ERP44_MOUSE	Endoplasmic reticulum resident protein 44 OS=Mus musculus GN=Erp44 PE=1 SV=1	1.526	6.327e-09	2.42435e+06	3.55489e+06
EED_MOUSE	Isoform 2 of Polycomb protein EED OS=Mus musculus GN=Eed	1.525	3.301e-05	2.11252e+06	3.07881e+06
COX15_MOUSE	Cytochrome c oxidase assembly protein COX15 homolog OS=Mus musculus GN=Cox15 PE=2 SV=1	1.523	1.867e-12	1.41637e+06	2156713
MTCH2_MOUSE	Mitochondrial carrier homolog 2 OS=Mus musculus GN=Mtch2 PE=1 SV=1	1.522	5.416e-14	3.44396e+06	5.15674e+06
GL8D1_MOUSE	Glycosyltransferase 8 domain-containing protein 1 OS=Mus musculus GN=Glt8d1 PE=2 SV=1	1.521	0.006	366643	557504
ACD11_MOUSE	Acyl-CoA dehydrogenase family member 11 OS=Mus musculus GN=Acad11 PE=1 SV=2	1.52	0.011	1.32805e+06	2018726
RT29_MOUSE	28S ribosomal protein S29, mitochondrial OS=Mus musculus GN=Dap3 PE=2 SV=1	1.519	2.401e-06	462830	714756
SYTM_MOUSE	Threonyl-tRNA synthetase, mitochondrial OS=Mus musculus GN=Tars2 PE=2 SV=1	1.518	3.752e-05	1.32139e+06	1.91886e+06
CM023_MOUSE	Uncharacterized protein C13orf23 homolog OS=Mus musculus PE=2 SV=1	1.517	0.0006693	285815	433540
TRAP1_MOUSE	Heat shock protein 75 kDa, mitochondrial OS=Mus musculus GN=Trap1 PE=1 SV=1	1.517	1.745e-07	1.11726e+06	1.74554e+06
HXK2_MOUSE	Hexokinase-2 OS=Mus musculus GN=Hk2 PE=1 SV=1	1.516	4.04e-10	2817193	4.07722e+06
DHB4_MOUSE	Peroxisomal multifunctional enzyme type 2 OS=Mus musculus GN=Hsd17b4 PE=1 SV=3	1.516	3.995e-14	1.35e+06	2.11445e+06
TBRG4_MOUSE	Protein TBRG4 OS=Mus musculus GN=Tbrg4 PE=2 SV=1	1.514	9.665e-09	1.30835e+06	1.99733e+06
SNW1_MOUSE	SNW domain-containing protein 1 OS=Mus musculus GN=Snw1 PE=1 SV=3	1.512	0.0008811	1.05394e+06	1582736
ECHB_MOUSE	Trifunctional enzyme subunit beta, mitochondrial OS=Mus musculus GN=Hadhb PE=1 SV=1	1.512	1.788e-06	2869709	4.14098e+06
PLBL2_MOUSE	Putative phospholipase B-like 2 OS=Mus musculus GN=Plbd2 PE=1 SV=2	1.511	5.174e-12	1.7697e+06	2.67492e+06
GORS2_MOUSE	Golgi reassembly-stacking protein 2 OS=Mus musculus GN=Gorasp2 PE=1 SV=3	1.51	1.788e-10	4899581	7.12219e+06
CDC23_MOUSE	Cell division cycle protein 23 homolog OS=Mus musculus GN=Cdc23 PE=1 SV=2	1.51	0.006	2.51081e+06	4.41622e+06
GRPE1_MOUSE	GrpE protein homolog 1, mitochondrial OS=Mus musculus GN=Grpel1 PE=1 SV=1	1.509	0.0001318	1.24084e+06	1734979
F162A_MOUSE	Protein FAM162A OS=Mus musculus GN=Fam162a PE=2 SV=1	1.508	3.064e-07	2.14432e+06	3232094
ACOT2_MOUSE	Acyl-coenzyme A thioesterase 2, mitochondrial OS=Mus musculus GN=Acot2 PE=1 SV=1	1.507	0.006	514125	774878
RAP1B_MOUSE	Ras-related protein Rap-1b OS=Mus musculus GN=Rap1b PE=2 SV=2	1.507	5.621e-11	3.71972e+06	5.53623e+06
TM9S4_MOUSE	Transmembrane 9 superfamily member 4 OS=Mus musculus GN=Tm9sf4 PE=2 SV=1	1.506	2.478e-11	542342	818746
TM9S3_MOUSE	Transmembrane 9 superfamily member 3 OS=Mus musculus GN=Tm9sf3 PE=1 SV=1	1.504	4.082e-21	7467682	10899225
CH60_MOUSE	60 kDa heat shock protein, mitochondrial OS=Mus musculus GN=Hspd1 PE=1 SV=1	1.504	8.532e-08	1.76964e+06	2.7754e+06
PACS1_MOUSE	Phosphofurin acidic cluster sorting protein 1 OS=Mus musculus GN=Pacs1 PE=1 SV=2	1.504	7.613e-07	830823	1.18923e+06
LONM_MOUSE	Lon protease homolog, mitochondrial OS=Mus musculus GN=Lonp1 PE=1 SV=2	1.504	1.001e-05	775144	1188234
OAT_MOUSE	Ornithine aminotransferase, mitochondrial OS=Mus musculus GN=Oat PE=1 SV=1	1.502	3.594e-16	1.81425e+06	2.66136e+06
K0907_MOUSE	Isoform 2 of UPF0469 protein KIAA0907 OS=Mus musculus GN=Kiaa0907	1.493	1.329e-05	668254	997844
CPT2_MOUSE	Carnitine O-palmitoyltransferase 2, mitochondrial OS=Mus musculus GN=Cpt2 PE=1 SV=1	1.491	0.002	1.04494e+06	1.70844e+06
ODPA_MOUSE	Pyruvate dehydrogenase E1 component subunit alpha, somatic form, mitochondrial OS=Mus musculus GN=Pdha1 PE=1 SV=1	1.49	1.578e-09	4423509	6.41715e+06
MAOM_MOUSE	NAD-dependent malic enzyme, mitochondrial OS=Mus musculus GN=Me2 PE=2 SV=1	1.489	0.0008093	931792	1.19718e+06
TIM50_MOUSE	Mitochondrial import inner membrane translocase subunit TIM50 OS=Mus musculus GN=Timm50 PE=1 SV=1	1.488	5.219e-07	625073	930308
NNTM_MOUSE	NAD(P) transhydrogenase, mitochondrial OS=Mus musculus GN=Nnt PE=1 SV=2	1.488	0	2.33962e+06	3486762
ABD12_MOUSE	Monoacylglycerol lipase ABHD12 OS=Mus musculus GN=Abhd12 PE=1 SV=2	1.485	0.019	259201	425866
ETFA_MOUSE	Electron transfer flavoprotein subunit alpha, mitochondrial OS=Mus musculus GN=Etfa PE=1 SV=2	1.485	8.037e-09	3109832	4.85703e+06
IDHG1_MOUSE	Isocitrate dehydrogenase [NAD] subunit gamma 1, mitochondrial OS=Mus musculus GN=Idh3g PE=1 SV=1	1.484	8.799e-25	4.8016e+06	7.0264e+06
HMGCL_MOUSE	Hydroxymethylglutaryl-CoA lyase, mitochondrial OS=Mus musculus GN=Hmgcl PE=1 SV=1	1.483	0.0004117	343700	509817
DJC10_MOUSE	DnaJ homolog subfamily C member 10 OS=Mus musculus GN=Dnajc10 PE=1 SV=1	1.482	0.0001534	1.24456e+06	1.84568e+06
ELMO1_MOUSE	Engulfment and cell motility protein 1 OS=Mus musculus GN=Elmo1 PE=1 SV=2	1.481	4.702e-11	738263	1.07627e+06
NU5M_MOUSE	NADH-ubiquinone oxidoreductase chain 5 OS=Mus musculus GN=Mtnd5 PE=2 SV=2	1.48	0.258	111356	164650
ATF7_MOUSE	Cyclic AMP-dependent transcription factor ATF-7 OS=Mus musculus GN=Atf7 PE=1 SV=1	1.48	0.003	1.29302e+06	1.90356e+06
SEP11_MOUSE	Isoform 2 of Septin-11 OS=Mus musculus GN=Sept11	1.48	0.0006644	2.63531e+06	3.89388e+06
DDX42_MOUSE	ATP-dependent RNA helicase DDX42 OS=Mus musculus GN=Ddx42 PE=1 SV=3	1.479	0.003	699198	1035436
DHX36_MOUSE	Probable ATP-dependent RNA helicase DHX36 OS=Mus musculus GN=Dhx36 PE=2 SV=1	1.478	0.002	276560	397763
TFE2_MOUSE	Transcription factor E2-alpha OS=Mus musculus GN=Tcf3 PE=1 SV=2	1.476	2.741e-09	3.69848e+06	5190817
CDK2_MOUSE	Cyclin-dependent kinase 2 OS=Mus musculus GN=Cdk2 PE=1 SV=2	1.476	6.508e-08	1.03616e+06	1.58492e+06
MPCP_MOUSE	Phosphate carrier protein, mitochondrial OS=Mus musculus GN=Slc25a3 PE=1 SV=1	1.475	0	13287348	19494440
ATN1_MOUSE	Atrophin-1 OS=Mus musculus GN=Atn1 PE=1 SV=1	1.475	6.784e-31	2492849	3658163
DLDH_MOUSE	Dihydrolipoyl dehydrogenase, mitochondrial OS=Mus musculus GN=Dld PE=1 SV=2	1.474	9.107e-12	4241028	6.34642e+06
RM37_MOUSE	39S ribosomal protein L37, mitochondrial OS=Mus musculus GN=Mrpl37 PE=2 SV=1	1.473	0.0008789	1.51817e+06	2179476
NDUAA_MOUSE	NADH dehydrogenase [ubiquinone] 1 alpha subcomplex subunit 10, mitochondrial OS=Mus musculus GN=Ndufa10 PE=1 SV=1	1.473	6.109e-06	1.18044e+06	1.82226e+06
ACOT8_MOUSE	Acyl-coenzyme A thioesterase 8 OS=Mus musculus GN=Acot8 PE=1 SV=1	1.472	5.941e-10	1.29241e+06	1.98687e+06
LTMD1_MOUSE	Isoform 2 of LETM1 domain-containing protein 1 OS=Mus musculus GN=Letmd1	1.472	9.038e-10	2880809	4.2398e+06
RAB7A_MOUSE	Ras-related protein Rab-7a OS=Mus musculus GN=Rab7a PE=1 SV=2	1.472	9.635e-15	1.56368e+06	2286653
NEDD8_MOUSE	NEDD8 OS=Mus musculus GN=Nedd8 PE=1 SV=2	1.471	3.37e-07	2.84821e+06	4192555
IF4G1_MOUSE	Eukaryotic translation initiation factor 4 gamma 1 OS=Mus musculus GN=Eif4g1 PE=1 SV=1	1.471	1.335e-20	2534875	3734764
HAUS4_MOUSE	HAUS augmin-like complex subunit 4 OS=Mus musculus GN=Haus4 PE=2 SV=1	1.469	0.002	330849	486153
RM04_MOUSE	39S ribosomal protein L4, mitochondrial OS=Mus musculus GN=Mrpl4 PE=2 SV=1	1.468	5.165e-07	936200	1.37415e+06
PCCB_MOUSE	Propionyl-CoA carboxylase beta chain, mitochondrial OS=Mus musculus GN=Pccb PE=1 SV=1	1.468	0.011	1.00144e+06	1.48367e+06
ADT1_MOUSE	ADP/ATP translocase 1 OS=Mus musculus GN=Slc25a4 PE=1 SV=4	1.468	9.954e-21	20638062	30503952
PRTN3_MOUSE	Myeloblastin OS=Mus musculus GN=Prtn3 PE=2 SV=2	1.467	0.000483	525634	771032
STRN3_MOUSE	Striatin-3 OS=Mus musculus GN=Strn3 PE=1 SV=1	1.467	0.099	656649	969271
DIC_MOUSE	Mitochondrial dicarboxylate carrier OS=Mus musculus GN=Slc25a10 PE=2 SV=2	1.463	0.004	743621	1.06797e+06
P5CR2_MOUSE	Pyrroline-5-carboxylate reductase 1, mitochondrial OS=Mus musculus GN=Pycr1 PE=1 SV=1	1.462	0.002	1.56529e+06	2.28534e+06
SYMM_MOUSE	Methionyl-tRNA synthetase, mitochondrial OS=Mus musculus GN=Mars2 PE=2 SV=2	1.462	0.081	367733	536269
FOXK1_MOUSE	Forkhead box protein K1 OS=Mus musculus GN=Foxk1 PE=1 SV=2	1.459	4.216e-12	5960495	8447394
QCR1_MOUSE	Cytochrome b-c1 complex subunit 1, mitochondrial OS=Mus musculus GN=Uqcrc1 PE=1 SV=1	1.458	6.637e-08	3266001	4777958
GRWD1_MOUSE	Glutamate-rich WD repeat-containing protein 1 OS=Mus musculus GN=Grwd1 PE=2 SV=1	1.457	0.011	223484	325724
MTCH1_MOUSE	Mitochondrial carrier homolog 1 OS=Mus musculus GN=Mtch1 PE=1 SV=1	1.452	4.849e-05	1.02681e+06	1490655
MDHM_MOUSE	Malate dehydrogenase, mitochondrial OS=Mus musculus GN=Mdh2 PE=1 SV=3	1.451	0	16829978	24168684
ATPA_MOUSE	ATP synthase subunit alpha, mitochondrial OS=Mus musculus GN=Atp5a1 PE=1 SV=1	1.448	2.696e-36	5.43069e+06	8.00001e+06
ACON_MOUSE	Aconitate hydratase, mitochondrial OS=Mus musculus GN=Aco2 PE=1 SV=1	1.448	2.988e-10	3.55131e+06	5320686
SCAM3_MOUSE	Secretory carrier-associated membrane protein 3 OS=Mus musculus GN=Scamp3 PE=1 SV=2	1.447	0.0008523	1.67221e+06	2.42653e+06
LPPRC_MOUSE	Leucine-rich PPR motif-containing protein, mitochondrial OS=Mus musculus GN=Lrpprc PE=1 SV=2	1.447	9.277e-20	1.47375e+06	2.14789e+06
DHSB_MOUSE	Succinate dehydrogenase [ubiquinone] iron-sulfur subunit, mitochondrial OS=Mus musculus GN=Sdhb PE=1 SV=1	1.447	1.475e-05	4920425	6.67033e+06
NALP5_MOUSE	Isoform 6 of NACHT, LRR and PYD domains-containing protein 5 OS=Mus musculus GN=Nlrp5	1.446	2.279e-14	5152941	7448924
REEP5_MOUSE	Receptor expression-enhancing protein 5 OS=Mus musculus GN=Reep5 PE=1 SV=1	1.443	0.000159	5906118	8507802
EFTU_MOUSE	Elongation factor Tu, mitochondrial OS=Mus musculus GN=Tufm PE=1 SV=1	1.442	7.236e-08	3.09221e+06	4.72048e+06
IF6_MOUSE	Eukaryotic translation initiation factor 6 OS=Mus musculus GN=Eif6 PE=1 SV=2	1.441	2.191e-16	3.32557e+06	4.86058e+06
VAT1_MOUSE	Synaptic vesicle membrane protein VAT-1 homolog OS=Mus musculus GN=Vat1 PE=1 SV=3	1.44	3.708e-10	1.2974e+06	1.86865e+06
CREG1_MOUSE	Protein CREG1 OS=Mus musculus GN=Creg1 PE=2 SV=1	1.44	0.0003725	522747	752666
MA2A1_MOUSE	Alpha-mannosidase 2 OS=Mus musculus GN=Man2a1 PE=1 SV=1	1.439	7.609e-43	2161835	3108656
ESCO2_MOUSE	N-acetyltransferase ESCO2 OS=Mus musculus GN=Esco2 PE=2 SV=3	1.437	4.884e-05	1.04361e+06	1.50002e+06
IDHP_MOUSE	Isocitrate dehydrogenase [NADP], mitochondrial OS=Mus musculus GN=Idh2 PE=1 SV=3	1.43	8.117e-15	3.15298e+06	4.57929e+06
NAA40_MOUSE	N-alpha-acetyltransferase 40, NatD catalytic subunit OS=Mus musculus GN=Naa40 PE=2 SV=1	1.43	0.002	718678	1027953
HXK1_MOUSE	Isoform HK1 of Hexokinase-1 OS=Mus musculus GN=Hk1	1.43	1.161e-08	2.51293e+06	3.68854e+06
ALDH2_MOUSE	Aldehyde dehydrogenase, mitochondrial OS=Mus musculus GN=Aldh2 PE=1 SV=1	1.427	0	18782166	26491446
ATF6B_MOUSE	Cyclic AMP-dependent transcription factor ATF-6 beta OS=Mus musculus GN=Atf6b PE=2 SV=1	1.426	1.806e-06	399436	569928
VDAC2_MOUSE	Voltage-dependent anion-selective channel protein 2 OS=Mus musculus GN=Vdac2 PE=1 SV=2	1.426	1.878e-10	6701100	9609273
PELP1_MOUSE	Proline-, glutamic acid- and leucine-rich protein 1 OS=Mus musculus GN=Pelp1 PE=1 SV=2	1.426	0.037	177852	253574
ODO1_MOUSE	Isoform 3 of 2-oxoglutarate dehydrogenase, mitochondrial OS=Mus musculus GN=Ogdh	1.425	3.772e-14	4.12848e+06	5.91546e+06
PCBP2_MOUSE	Isoform 2 of Poly(rC)-binding protein 2 OS=Mus musculus GN=Pcbp2	1.424	8.794e-07	7.2207e+06	10839641
SC23B_MOUSE	Protein transport protein Sec23B OS=Mus musculus GN=Sec23b PE=2 SV=1	1.422	0.159	204391	289978
AL1A1_MOUSE	Retinal dehydrogenase 1 OS=Mus musculus GN=Aldh1a1 PE=1 SV=5	1.421	6.645e-05	8537313	12066907
SELH_MOUSE	Selenoprotein H OS=Mus musculus GN=Selh PE=2 SV=2	1.42	0.027	2392430	3399463
MIRO1_MOUSE	Isoform 2 of Mitochondrial Rho GTPase 1 OS=Mus musculus GN=Rhot1	1.42	0.006	573404	778145
RPA43_MOUSE	DNA-directed RNA polymerase I subunit RPA43 OS=Mus musculus GN=Twistnb PE=1 SV=1	1.42	0.004	345675	490828
S39AA_MOUSE	Zinc transporter ZIP10 OS=Mus musculus GN=Slc39a10 PE=1 SV=1	1.42	0.002	683598	970302
FADS2_MOUSE	Fatty acid desaturase 2 OS=Mus musculus GN=Fads2 PE=2 SV=1	1.419	1.653e-05	1.92129e+06	2.53532e+06
TAOK3_MOUSE	Serine/threonine-protein kinase TAO3 OS=Mus musculus GN=Taok3 PE=1 SV=2	1.419	7.913e-08	1.32798e+06	1.88421e+06
DHSA_MOUSE	Succinate dehydrogenase [ubiquinone] flavoprotein subunit, mitochondrial OS=Mus musculus GN=Sdha PE=1 SV=1	1.417	1.426e-11	7532390	10852235
NDUS1_MOUSE	NADH-ubiquinone oxidoreductase 75 kDa subunit, mitochondrial OS=Mus musculus GN=Ndufs1 PE=1 SV=1	1.417	5.418e-13	1413756	1.99891e+06
IMB1_MOUSE	Importin subunit beta-1 OS=Mus musculus GN=Kpnb1 PE=1 SV=1	1.415	3.538e-23	5844611	8.05306e+06
TAP2_MOUSE	Antigen peptide transporter 2 OS=Mus musculus GN=Tap2 PE=2 SV=1	1.415	0.025	331463	490499
IDH3A_MOUSE	Isocitrate dehydrogenase [NAD] subunit alpha, mitochondrial OS=Mus musculus GN=Idh3a PE=1 SV=1	1.415	6.48e-09	4.83404e+06	7313633
DHE3_MOUSE	Glutamate dehydrogenase 1, mitochondrial OS=Mus musculus GN=Glud1 PE=1 SV=1	1.412	0.0007283	3.1207e+06	4976384
GLYC_MOUSE	Serine hydroxymethyltransferase, cytosolic OS=Mus musculus GN=Shmt1 PE=1 SV=2	1.409	0.004	456892	643496
AATM_MOUSE	Aspartate aminotransferase, mitochondrial OS=Mus musculus GN=Got2 PE=1 SV=1	1.408	8.537e-25	6.38147e+06	8983113
TM168_MOUSE	Transmembrane protein 168 OS=Mus musculus GN=Tmem168 PE=2 SV=1	1.406	0.007	677994	953494
SPATL_MOUSE	Isoform 3 of Protein SPATIAL OS=Mus musculus GN=Spatial	1.406	7.401e-07	6988920	9822448
KDM3A_MOUSE	Lysine-specific demethylase 3A OS=Mus musculus GN=Kdm3a PE=1 SV=1	1.406	0.003	293651	412796
ATR_MOUSE	Serine/threonine-protein kinase ATR OS=Mus musculus GN=Atr PE=1 SV=2	1.405	1.688e-05	160786	229464
KPCD_MOUSE	Isoform 2 of Protein kinase C delta type OS=Mus musculus GN=Prkcd	1.405	1.098e-11	7137551	10030152
GSTM4_MOUSE	Glutathione S-transferase Mu 3 OS=Mus musculus GN=Gstm3 PE=1 SV=2	1.404	1.414e-07	11101681	15614135
PCKGM_MOUSE	Phosphoenolpyruvate carboxykinase [GTP], mitochondrial OS=Mus musculus GN=Pck2 PE=2 SV=1	1.403	2.907e-08	801907	1.12854e+06
CALU_MOUSE	Calumenin OS=Mus musculus GN=Calu PE=1 SV=1	1.403	0.018	2.46504e+06	3.57395e+06
ES1_MOUSE	ES1 protein homolog, mitochondrial OS=Mus musculus GN=D10Jhu81e PE=1 SV=1	1.402	7.026e-08	1.73934e+06	2.43962e+06
PAPD1_MOUSE	Poly(A) RNA polymerase, mitochondrial OS=Mus musculus GN=Mtpap PE=2 SV=1	1.401	0.013	365114	511657
TPSN_MOUSE	Tapasin OS=Mus musculus GN=Tapbp PE=2 SV=2	1.401	0.0009813	1.74122e+06	2.85525e+06
NCBP1_MOUSE	Nuclear cap-binding protein subunit 1 OS=Mus musculus GN=Ncbp1 PE=1 SV=2	1.401	2.387e-21	4.70573e+06	6.55904e+06
GPDM_MOUSE	Glycerol-3-phosphate dehydrogenase, mitochondrial OS=Mus musculus GN=Gpd2 PE=1 SV=2	1.4	1.887e-06	1707718	2.37026e+06
GCFC1_MOUSE	GC-rich sequence DNA-binding factor 1 OS=Mus musculus GN=Gcfc1 PE=1 SV=2	1.399	0.014	295419	413277
RBM27_MOUSE	RNA-binding protein 27 OS=Mus musculus GN=Rbm27 PE=2 SV=2	1.395	5.773e-13	5.63562e+06	7725052
CCNK_MOUSE	Cyclin-K OS=Mus musculus GN=Ccnk PE=1 SV=2	1.393	2.285e-07	1.55166e+06	2.12516e+06
PROD_MOUSE	Proline dehydrogenase 1, mitochondrial OS=Mus musculus GN=Prodh PE=2 SV=2	1.392	3.025e-07	2243560	3.18469e+06
RBM26_MOUSE	Isoform 2 of RNA-binding protein 26 OS=Mus musculus GN=Rbm26	1.392	1.599e-06	5610749	8176902
DYL1_MOUSE	Dynein light chain 1, cytoplasmic OS=Mus musculus GN=Dynll1 PE=1 SV=1	1.39	0.036	3.99717e+06	7806527
COMT_MOUSE	Catechol O-methyltransferase OS=Mus musculus GN=Comt PE=1 SV=1	1.389	0.0004766	482760	670651
FADS1_MOUSE	Fatty acid desaturase 1 OS=Mus musculus GN=Fads1 PE=2 SV=1	1.389	2.002e-12	4269746	6010877
SCOT1_MOUSE	Succinyl-CoA:3-ketoacid-coenzyme A transferase 1, mitochondrial OS=Mus musculus GN=Oxct1 PE=1 SV=1	1.389	0.0001247	252606	353284
HEXA_MOUSE	Beta-hexosaminidase subunit alpha OS=Mus musculus GN=Hexa PE=2 SV=1	1.389	4.855e-22	965911	1.34051e+06
PTH2_MOUSE	Peptidyl-tRNA hydrolase 2, mitochondrial OS=Mus musculus GN=Ptrh2 PE=2 SV=1	1.389	3.069e-32	1.30789e+06	1.81975e+06
ESYT1_MOUSE	Extended synaptotagmin-1 OS=Mus musculus GN=Esyt1 PE=2 SV=2	1.388	2.774e-26	2.71064e+06	3.74873e+06
ALG2_MOUSE	Alpha-1,3-mannosyltransferase ALG2 OS=Mus musculus GN=Alg2 PE=2 SV=2	1.388	0.0002072	1708036	2.40907e+06
ERG7_MOUSE	Lanosterol synthase OS=Mus musculus GN=Lss PE=2 SV=2	1.385	0.032	1.69197e+06	2230542
ODO2_MOUSE	Dihydrolipoyllysine-residue succinyltransferase component of 2-oxoglutarate dehydrogenase complex, mitochondrial OS=Mus musculus GN=Dlst PE=1 SV=1	1.385	1.974e-12	2.67976e+06	3703702
SPT6H_MOUSE	Transcription elongation factor SPT6 OS=Mus musculus GN=Supt6h PE=1 SV=2	1.385	0.0001563	1.30642e+06	1809161
AT1A1_MOUSE	Sodium/potassium-transporting ATPase subunit alpha-1 OS=Mus musculus GN=Atp1a1 PE=1 SV=1	1.384	1.41e-11	5.09408e+06	7120361
SEPT9_MOUSE	Septin-9 OS=Mus musculus GN=Sept9 PE=1 SV=1	1.382	1.202e-05	2.03403e+06	2856849
BEGIN_MOUSE	Brain-enriched guanylate kinase-associated protein OS=Mus musculus GN=Begain PE=1 SV=2	1.381	1.185e-07	6596850	9110998
LSM2_MOUSE	U6 snRNA-associated Sm-like protein LSm2 OS=Mus musculus GN=Lsm2 PE=2 SV=1	1.381	0.001	1.12542e+06	1.5748e+06
TRXR2_MOUSE	Isoform 2 of Thioredoxin reductase 2, mitochondrial OS=Mus musculus GN=Txnrd2	1.38	8.253e-20	3.57824e+06	4894583
ATAD5_MOUSE	ATPase family AAA domain-containing protein 5 OS=Mus musculus GN=Atad5 PE=1 SV=1	1.378	0.033	370956	510686
SC6A6_MOUSE	Sodium- and chloride-dependent taurine transporter OS=Mus musculus GN=Slc6a6 PE=1 SV=2	1.374	4.89e-07	3.09322e+06	4.25551e+06
KAISO_MOUSE	Transcriptional regulator Kaiso OS=Mus musculus GN=Zbtb33 PE=1 SV=1	1.37	0.05	483116	662278
CISY_MOUSE	Citrate synthase, mitochondrial OS=Mus musculus GN=Cs PE=1 SV=1	1.37	1.212e-06	7.36987e+06	10326179
EWS_MOUSE	RNA-binding protein EWS OS=Mus musculus GN=Ewsr1 PE=1 SV=1	1.369	1.894e-16	17205792	23527966
COX2_MOUSE	Cytochrome c oxidase subunit 2 OS=Mus musculus GN=Mtco2 PE=1 SV=1	1.369	2.428e-10	4721072	6.70824e+06
GPAA1_MOUSE	Glycosylphosphatidylinositol anchor attachment 1 protein OS=Mus musculus GN=Gpaa1 PE=1 SV=3	1.368	0.005	1458742	2.00318e+06
SCRB2_MOUSE	Lysosome membrane protein 2 OS=Mus musculus GN=Scarb2 PE=1 SV=3	1.367	5.81e-05	1.35646e+06	1854643
BRE_MOUSE	BRCA1-A complex subunit BRE OS=Mus musculus GN=Bre PE=1 SV=2	1.366	0.001	539453	736659
TAF5L_MOUSE	TAF5-like RNA polymerase II p300/CBP-associated factor-associated factor 65 kDa subunit 5L OS=Mus musculus GN=Taf5l PE=2 SV=1	1.365	0.236	84808.5	115737
ATLA3_MOUSE	Atlastin-3 OS=Mus musculus GN=Atl3 PE=2 SV=1	1.364	1.27e-06	1.88639e+06	2.56829e+06
AMFR_MOUSE	E3 ubiquitin-protein ligase AMFR OS=Mus musculus GN=Amfr PE=1 SV=2	1.363	0.804	375762	510636
VPP2_MOUSE	V-type proton ATPase 116 kDa subunit a isoform 2 OS=Mus musculus GN=Atp6v0a2 PE=1 SV=2	1.363	0.018	2.63577e+06	3.24586e+06
LYAR_MOUSE	Cell growth-regulating nucleolar protein OS=Mus musculus GN=Lyar PE=1 SV=2	1.362	0.036	772134	1.05028e+06
3HIDH_MOUSE	3-hydroxyisobutyrate dehydrogenase, mitochondrial OS=Mus musculus GN=Hibadh PE=2 SV=1	1.362	0.013	1.37836e+06	1.87784e+06
RS17_MOUSE	40S ribosomal protein S17 OS=Mus musculus GN=Rps17 PE=1 SV=2	1.361	0.004	638130	867770
SEC13_MOUSE	Protein SEC13 homolog OS=Mus musculus GN=Sec13 PE=2 SV=3	1.36	0.007	1327907	1818269
ENV2_MOUSE	Retrovirus-related Env polyprotein from Fv-4 locus OS=Mus musculus GN=Fv4 PE=1 SV=2	1.36	2.136e-07	10610688	14422448
VA0D1_MOUSE	V-type proton ATPase subunit d 1 OS=Mus musculus GN=Atp6v0d1 PE=1 SV=2	1.36	4.531e-07	1.99899e+06	2.7188e+06
ABCD3_MOUSE	ATP-binding cassette sub-family D member 3 OS=Mus musculus GN=Abcd3 PE=1 SV=1	1.358	0.0001522	1.17391e+06	1.64635e+06
YIPF3_MOUSE	Protein YIPF3 OS=Mus musculus GN=Yipf3 PE=1 SV=1	1.357	2.745e-18	5809701	7886057
GMEB1_MOUSE	Glucocorticoid modulatory element-binding protein 1 OS=Mus musculus GN=Gmeb1 PE=2 SV=2	1.357	0.004	562049	763153
GRP75_MOUSE	Stress-70 protein, mitochondrial OS=Mus musculus GN=Hspa9 PE=1 SV=2	1.357	0.0003255	2.40159e+06	3271094
SYMPK_MOUSE	Symplekin OS=Mus musculus GN=Sympk PE=1 SV=1	1.356	0.071	2.02111e+06	2577351
GABPA_MOUSE	GA-binding protein alpha chain OS=Mus musculus GN=Gabpa PE=1 SV=1	1.353	1.194e-09	3.59109e+06	4726283
DOCK8_MOUSE	Dedicator of cytokinesis protein 8 OS=Mus musculus GN=Dock8 PE=2 SV=4	1.351	0.042	1.08879e+06	1.43127e+06
H13_MOUSE	Histone H1.3 OS=Mus musculus GN=Hist1h1d PE=1 SV=2	1.351	0.008	1.59615e+06	2.15776e+06
TBL1R_MOUSE	F-box-like/WD repeat-containing protein TBL1XR1 OS=Mus musculus GN=Tbl1xr1 PE=2 SV=1	1.35	0.0003253	911328	1300901
MOBL3_MOUSE	Mps one binder kinase activator-like 3 OS=Mus musculus GN=Mobkl3 PE=1 SV=1	1.348	9.651e-08	1.64709e+06	2.2209e+06
ZNT6_MOUSE	Zinc transporter 6 OS=Mus musculus GN=Slc30a6 PE=1 SV=1	1.348	0.021	1.16264e+06	1.56595e+06
HNRPF_MOUSE	Heterogeneous nuclear ribonucleoprotein F OS=Mus musculus GN=Hnrnpf PE=1 SV=3	1.348	0	10186378	13767220
BGAL_MOUSE	Beta-galactosidase OS=Mus musculus GN=Glb1 PE=2 SV=1	1.348	0.005	298597	395739
RUVB1_MOUSE	RuvB-like 1 OS=Mus musculus GN=Ruvbl1 PE=1 SV=1	1.347	0.002	1.94138e+06	2.57754e+06
MCM3_MOUSE	DNA replication licensing factor MCM3 OS=Mus musculus GN=Mcm3 PE=1 SV=2	1.346	1.471e-07	2.66387e+06	3.50526e+06
RAB18_MOUSE	Ras-related protein Rab-18 OS=Mus musculus GN=Rab18 PE=2 SV=2	1.346	0.0003144	1.16288e+06	1564987
PDIA3_MOUSE	Protein disulfide-isomerase A3 OS=Mus musculus GN=Pdia3 PE=1 SV=2	1.345	8.307e-11	3288527	4519877
CN021_MOUSE	Pumilio domain-containing protein C14orf21 homolog OS=Mus musculus PE=2 SV=1	1.345	1.291e-05	971230	1.22015e+06
PDIA1_MOUSE	Protein disulfide-isomerase OS=Mus musculus GN=P4hb PE=1 SV=1	1.344	1.681e-14	1.92486e+06	2.55205e+06
PTN6_MOUSE	Isoform 2 of Tyrosine-protein phosphatase non-receptor type 6 OS=Mus musculus GN=Ptpn6	1.344	4.514e-05	1.82716e+06	2390152
OSTC_MOUSE	Oligosaccharyltransferase complex subunit OSTC OS=Mus musculus GN=Ostc PE=2 SV=1	1.342	3.581e-06	4.24413e+06	5694262
ZCCHV_MOUSE	Zinc finger CCCH-type antiviral protein 1 OS=Mus musculus GN=Zc3hav1 PE=1 SV=1	1.341	0.005	2.92347e+06	4.30032e+06
PDE3B_MOUSE	cGMP-inhibited 3',5'-cyclic phosphodiesterase B OS=Mus musculus GN=Pde3b PE=1 SV=2	1.341	0.218	483674	646107
DDX3X_MOUSE	ATP-dependent RNA helicase DDX3X OS=Mus musculus GN=Ddx3x PE=1 SV=3	1.34	9.661e-05	3.91227e+06	5234803
PARL_MOUSE	Presenilins-associated rhomboid-like protein, mitochondrial OS=Mus musculus GN=Parl PE=1 SV=1	1.338	0.48	210423	278633
FAAH1_MOUSE	Fatty-acid amide hydrolase 1 OS=Mus musculus GN=Faah PE=2 SV=1	1.338	0.014	450641	602875
MANBA_MOUSE	Beta-mannosidase OS=Mus musculus GN=Manba PE=2 SV=1	1.337	0.034	2339034	2.87201e+06
CATZ_MOUSE	Cathepsin Z OS=Mus musculus GN=Ctsz PE=2 SV=1	1.335	1.298e-08	5328868	7119459
CBP_MOUSE	CREB-binding protein OS=Mus musculus GN=Crebbp PE=1 SV=2	1.335	0.001	1.94009e+06	2537145
E2F8_MOUSE	Transcription factor E2F8 OS=Mus musculus GN=E2f8 PE=1 SV=1	1.335	0.189	160247	213790
WLS_MOUSE	Protein wntless homolog OS=Mus musculus GN=Wls PE=1 SV=1	1.333	0.406	1.57626e+06	2.1446e+06
RL27_MOUSE	60S ribosomal protein L27 OS=Mus musculus GN=Rpl27 PE=2 SV=2	1.331	0.0001355	4.57041e+06	6078467
FACR1_MOUSE	Isoform 3 of Fatty acyl-CoA reductase 1 OS=Mus musculus GN=Far1	1.33	7.078e-05	4.50455e+06	6036714
VDAC3_MOUSE	Voltage-dependent anion-selective channel protein 3 OS=Mus musculus GN=Vdac3 PE=1 SV=1	1.328	1.993e-16	6040513	7.96539e+06
UBC_MOUSE	Polyubiquitin-B OS=Mus musculus GN=Ubb PE=1 SV=1	1.327	0.063	18562264	24661736
KIF2C_MOUSE	Kinesin-like protein KIF2C OS=Mus musculus GN=Kif2c PE=1 SV=1	1.327	0.33	170586	225692
ARHG2_MOUSE	Isoform 4 of Rho guanine nucleotide exchange factor 2 OS=Mus musculus GN=Arhgef2	1.327	6.767e-16	2661797	3.61348e+06
TM131_MOUSE	Transmembrane protein 131 OS=Mus musculus GN=Tmem131 PE=1 SV=2	1.326	9.425e-08	1.48962e+06	1.97974e+06
ABHGA_MOUSE	Abhydrolase domain-containing protein 16A OS=Mus musculus GN=Abhd16a PE=1 SV=3	1.326	0.0006472	1.33604e+06	1.8405e+06
KDM3B_MOUSE	Lysine-specific demethylase 3B OS=Mus musculus GN=Kdm3b PE=1 SV=2	1.325	1.945e-20	2.66892e+06	3548667
BUD31_MOUSE	Protein BUD31 homolog OS=Mus musculus GN=Bud31 PE=2 SV=1	1.325	1.64e-09	1.4684e+06	1.94853e+06
CLC2D_MOUSE	C-type lectin domain family 2 member D OS=Mus musculus GN=Clec2d PE=1 SV=1	1.324	2.754e-06	1671243	2.21369e+06
ATAD2_MOUSE	ATPase family AAA domain-containing protein 2 OS=Mus musculus GN=Atad2 PE=1 SV=1	1.324	0.115	515285	681824
CTR9_MOUSE	Isoform 2 of RNA polymerase-associated protein CTR9 homolog OS=Mus musculus GN=Ctr9	1.324	0.005	2.22211e+06	2.94079e+06
VIP2_MOUSE	Inositol hexakisphosphate and diphosphoinositol-pentakisphosphate kinase 2 OS=Mus musculus GN=Ppip5k2 PE=1 SV=2	1.32	0.034	626975	827915
RFA2_MOUSE	Replication protein A 32 kDa subunit OS=Mus musculus GN=Rpa2 PE=1 SV=1	1.32	0.045	334746	441684
TIA1_MOUSE	Nucleolysin TIA-1 OS=Mus musculus GN=Tia1 PE=1 SV=1	1.319	2.206e-14	1.35185e+06	1.78506e+06
MOT1_MOUSE	Monocarboxylate transporter 1 OS=Mus musculus GN=Slc16a1 PE=1 SV=1	1.317	5.293e-09	10226665	13145418
MGAT2_MOUSE	Alpha-1,6-mannosyl-glycoprotein 2-beta-N-acetylglucosaminyltransferase OS=Mus musculus GN=Mgat2 PE=2 SV=1	1.314	1.371e-05	2642943	3404343
ADT2_MOUSE	ADP/ATP translocase 2 OS=Mus musculus GN=Slc25a5 PE=1 SV=3	1.314	3.485e-10	6.54845e+06	8516545
LMAN2_MOUSE	Vesicular integral-membrane protein VIP36 OS=Mus musculus GN=Lman2 PE=2 SV=1	1.312	2.351e-27	9650282	12703117
PP1A_MOUSE	Serine/threonine-protein phosphatase PP1-alpha catalytic subunit OS=Mus musculus GN=Ppp1ca PE=1 SV=1	1.31	3.733e-31	10183818	13334471
LCMT2_MOUSE	Leucine carboxyl methyltransferase 2 OS=Mus musculus GN=Lcmt2 PE=2 SV=3	1.31	0.128	249217	325915
SK2L2_MOUSE	Superkiller viralicidic activity 2-like 2 OS=Mus musculus GN=Skiv2l2 PE=2 SV=1	1.309	1.404e-10	826791	1.05916e+06
ACADL_MOUSE	Long-chain specific acyl-CoA dehydrogenase, mitochondrial OS=Mus musculus GN=Acadl PE=2 SV=2	1.309	3.09e-07	3.93471e+06	5.18265e+06
EXOS7_MOUSE	Exosome complex exonuclease RRP42 OS=Mus musculus GN=Exosc7 PE=2 SV=1	1.307	0.364	120653	157587
CKAP5_MOUSE	Isoform 2 of Cytoskeleton-associated protein 5 OS=Mus musculus GN=Ckap5	1.307	0.125	2.20965e+06	2.60554e+06
LRCH1_MOUSE	Leucine-rich repeat and calponin homology domain-containing protein 1 OS=Mus musculus GN=Lrch1 PE=1 SV=1	1.306	0.205	192169	250913
TPP1_MOUSE	Tripeptidyl-peptidase 1 OS=Mus musculus GN=Tpp1 PE=1 SV=2	1.305	0.012	1.03526e+06	1.36585e+06
LRC8C_MOUSE	Leucine-rich repeat-containing protein 8C OS=Mus musculus GN=Lrrc8c PE=1 SV=1	1.305	6.452e-06	1.82449e+06	2380692
LRC41_MOUSE	Leucine-rich repeat-containing protein 41 OS=Mus musculus GN=Lrrc41 PE=1 SV=3	1.305	0.013	318016	414955
YIF1B_MOUSE	Protein YIF1B OS=Mus musculus GN=Yif1b PE=2 SV=2	1.304	1.798e-08	4.18831e+06	5460946
THA11_MOUSE	THAP domain-containing protein 11 OS=Mus musculus GN=Thap11 PE=1 SV=1	1.303	3.859e-05	1.31341e+06	1.71167e+06
SPERT_MOUSE	Spermatid-associated protein OS=Mus musculus GN=Spert PE=1 SV=2	1.302	1.092e-10	5918220	7706755
NUP54_MOUSE	Nuclear pore complex protein Nup54 OS=Mus musculus GN=Nup54 PE=1 SV=1	1.301	6.392e-09	4.1191e+06	5.37087e+06
RIF1_MOUSE	Isoform 2 of Telomere-associated protein RIF1 OS=Mus musculus GN=Rif1	1.301	0.0003327	403240	529180
MED1_MOUSE	Mediator of RNA polymerase II transcription subunit 1 OS=Mus musculus GN=Med1 PE=1 SV=2	1.301	0.0002635	1.26239e+06	1.7179e+06
TOM70_MOUSE	Mitochondrial import receptor subunit TOM70 OS=Mus musculus GN=Tomm70a PE=1 SV=1	1.301	0.004	1.78736e+06	2.20292e+06
PLCB3_MOUSE	1-phosphatidylinositol-4,5-bisphosphate phosphodiesterase beta-3 OS=Mus musculus GN=Plcb3 PE=2 SV=1	1.3	0.517	40680	52849.7
SAM50_MOUSE	Sorting and assembly machinery component 50 homolog OS=Mus musculus GN=Samm50 PE=1 SV=1	1.298	1.519e-22	1.50261e+06	1.94999e+06
RPAC1_MOUSE	DNA-directed RNA polymerases I and III subunit RPAC1 OS=Mus musculus GN=Polr1c PE=1 SV=3	1.298	0.007	1.16167e+06	1.50711e+06
NPM_MOUSE	Nucleophosmin OS=Mus musculus GN=Npm1 PE=1 SV=1	1.297	1.882e-15	15446708	19802674
LSG1_MOUSE	Large subunit GTPase 1 homolog OS=Mus musculus GN=Lsg1 PE=2 SV=2	1.296	0.043	267093	356721
VKOR1_MOUSE	Vitamin K epoxide reductase complex subunit 1 OS=Mus musculus GN=Vkorc1 PE=2 SV=1	1.296	0.006	2130150	2.75885e+06
ACSL5_MOUSE	Long-chain-fatty-acid--CoA ligase 5 OS=Mus musculus GN=Acsl5 PE=2 SV=1	1.296	0.0005047	1.15302e+06	1.48008e+06
HNRPQ_MOUSE	Heterogeneous nuclear ribonucleoprotein Q OS=Mus musculus GN=Syncrip PE=1 SV=2	1.296	0.0001838	3.03096e+06	4.06054e+06
TM7S3_MOUSE	Transmembrane 7 superfamily member 3 OS=Mus musculus GN=Tm7sf3 PE=2 SV=2	1.295	0.194	350332	452060
ZNT5_MOUSE	Zinc transporter 5 OS=Mus musculus GN=Slc30a5 PE=2 SV=1	1.293	0.0009423	2.94444e+06	3.81055e+06
EF1G_MOUSE	Elongation factor 1-gamma OS=Mus musculus GN=Eef1g PE=1 SV=3	1.292	6.536e-09	12660552	16368692
XRN2_MOUSE	5'-3' exoribonuclease 2 OS=Mus musculus GN=Xrn2 PE=1 SV=1	1.288	8.542e-07	2522640	3252890
SFXN1_MOUSE	Sideroflexin-1 OS=Mus musculus GN=Sfxn1 PE=1 SV=3	1.285	0.023	3597203	4397995
CTL2_MOUSE	Choline transporter-like protein 2 OS=Mus musculus GN=Slc44a2 PE=1 SV=1	1.285	0.01	2.82008e+06	3.8929e+06
WDR82_MOUSE	WD repeat-containing protein 82 OS=Mus musculus GN=Wdr82 PE=1 SV=1	1.285	0.117	1.16409e+06	1.49278e+06
PP1B_MOUSE	Serine/threonine-protein phosphatase PP1-beta catalytic subunit OS=Mus musculus GN=Ppp1cb PE=1 SV=3	1.284	1.977e-14	6.44056e+06	8.08909e+06
MAGT1_MOUSE	Isoform 2 of Magnesium transporter protein 1 OS=Mus musculus GN=Magt1	1.284	0.027	3.19215e+06	4.08204e+06
CGBP1_MOUSE	CGG triplet repeat-binding protein 1 OS=Mus musculus GN=Cggbp1 PE=2 SV=1	1.283	0.0004011	1663365	2.1332e+06
TM9S2_MOUSE	Transmembrane 9 superfamily member 2 OS=Mus musculus GN=Tm9sf2 PE=2 SV=1	1.28	3.774e-08	4.87713e+06	6374369
SSRD_MOUSE	Translocon-associated protein subunit delta OS=Mus musculus GN=Ssr4 PE=2 SV=1	1.279	4.721e-11	1.9226e+06	2448260
EF1B_MOUSE	Elongation factor 1-beta OS=Mus musculus GN=Eef1b PE=1 SV=5	1.278	1.469e-07	4.67411e+06	6.18068e+06
EMAL3_MOUSE	Echinoderm microtubule-associated protein-like 3 OS=Mus musculus GN=Eml3 PE=2 SV=1	1.278	0.089	1.5546e+06	1.65428e+06
SF01_MOUSE	Isoform CW17E of Splicing factor 1 OS=Mus musculus GN=Sf1	1.278	6.792e-27	18793078	23920308
MBNL1_MOUSE	Muscleblind-like protein 1 OS=Mus musculus GN=Mbnl1 PE=1 SV=1	1.278	3.015e-10	13209530	16882684
ACSL3_MOUSE	Long-chain-fatty-acid--CoA ligase 3 OS=Mus musculus GN=Acsl3 PE=2 SV=1	1.277	0.002	2.45105e+06	3.66445e+06
NCOR1_MOUSE	Nuclear receptor corepressor 1 OS=Mus musculus GN=Ncor1 PE=1 SV=1	1.277	0.024	2.25172e+06	2.835e+06
STAU1_MOUSE	Double-stranded RNA-binding protein Staufen homolog 1 OS=Mus musculus GN=Stau1 PE=2 SV=1	1.277	0.007	2993041	3.82578e+06
USMG5_MOUSE	Up-regulated during skeletal muscle growth protein 5 OS=Mus musculus GN=Usmg5 PE=1 SV=1	1.276	0.036	1528802	1.94943e+06
ATPB_MOUSE	ATP synthase subunit beta, mitochondrial OS=Mus musculus GN=Atp5b PE=1 SV=2	1.275	0.091	841287	1.0995e+06
NUCL_MOUSE	Nucleolin OS=Mus musculus GN=Ncl PE=1 SV=2	1.274	0.022	1.1904e+06	1518524
ERG_MOUSE	Transcriptional regulator ERG OS=Mus musculus GN=Erg PE=1 SV=2	1.273	0.0001062	7167387	8935971
SLIRP_MOUSE	SRA stem-loop-interacting RNA-binding protein, mitochondrial OS=Mus musculus GN=Slirp PE=1 SV=2	1.271	0.003	2.48431e+06	3155444
ERO1A_MOUSE	ERO1-like protein alpha OS=Mus musculus GN=Ero1l PE=1 SV=2	1.27	9.97e-07	2.04532e+06	2.58204e+06
GALT1_MOUSE	Polypeptide N-acetylgalactosaminyltransferase 1 OS=Mus musculus GN=Galnt1 PE=1 SV=1	1.27	0.439	1319756	1.33254e+06
VAS1_MOUSE	V-type proton ATPase subunit S1 OS=Mus musculus GN=Atp6ap1 PE=1 SV=1	1.27	4.11e-14	1083683	1.37554e+06
KI18B_MOUSE	Kinesin-like protein KIF18B OS=Mus musculus GN=Kif18b PE=2 SV=2	1.27	0.211	235071	298134
HTF4_MOUSE	Transcription factor 12 OS=Mus musculus GN=Tcf12 PE=1 SV=1	1.269	0.0002642	3260881	4.18365e+06
ORN_MOUSE	Oligoribonuclease, mitochondrial OS=Mus musculus GN=Rexo2 PE=1 SV=2	1.269	0.225	205142	260164
GLPK_MOUSE	Isoform 1 of Glycerol kinase OS=Mus musculus GN=Gk	1.268	0.039	1.9161e+06	2.78439e+06
ECHA_MOUSE	Trifunctional enzyme subunit alpha, mitochondrial OS=Mus musculus GN=Hadha PE=1 SV=1	1.268	0.205	1.74051e+06	2.01981e+06
PUF60_MOUSE	Isoform 2 of Poly(U)-binding-splicing factor PUF60 OS=Mus musculus GN=Puf60	1.268	0.141	3.29773e+06	4078384
CTGE5_MOUSE	cTAGE family member 5 OS=Mus musculus GN=Ctage5 PE=1 SV=1	1.262	0.001	389437	490473
PREP_MOUSE	Presequence protease, mitochondrial OS=Mus musculus GN=Pitrm1 PE=2 SV=1	1.262	0.004	2053909	2680031
LYAG_MOUSE	Lysosomal alpha-glucosidase OS=Mus musculus GN=Gaa PE=1 SV=2	1.261	0.014	586087	747443
WDR18_MOUSE	WD repeat-containing protein 18 OS=Mus musculus GN=Wdr18 PE=2 SV=1	1.261	0.002	1.95893e+06	2.61358e+06
GABP1_MOUSE	Isoform 3 of GA-binding protein subunit beta-1 OS=Mus musculus GN=Gabpb1	1.26	0.0009577	3.79201e+06	4785271
SNUT2_MOUSE	U4/U6.U5 tri-snRNP-associated protein 2 OS=Mus musculus GN=Usp39 PE=2 SV=2	1.259	0.002	914168	1.14217e+06
MTG16_MOUSE	Isoform 2 of Protein CBFA2T3 OS=Mus musculus GN=Cbfa2t3	1.259	0.0002093	5.55283e+06	6985357
NOP2_MOUSE	Putative ribosomal RNA methyltransferase NOP2 OS=Mus musculus GN=Nop2 PE=2 SV=1	1.258	0.013	999175	1225852
ZN787_MOUSE	Zinc finger protein 787 OS=Mus musculus GN=Znf787 PE=2 SV=2	1.256	0.036	882625	1.10843e+06
AGK_MOUSE	Acylglycerol kinase, mitochondrial OS=Mus musculus GN=Agk PE=1 SV=1	1.255	0.159	490171	614802
SYF1_MOUSE	Pre-mRNA-splicing factor SYF1 OS=Mus musculus GN=Xab2 PE=2 SV=1	1.255	0.102	687965	859834
CP51A_MOUSE	Lanosterol 14-alpha demethylase OS=Mus musculus GN=Cyp51a1 PE=2 SV=1	1.253	0.036	583188	743023
AT131_MOUSE	Probable cation-transporting ATPase 13A1 OS=Mus musculus GN=Atp13a1 PE=1 SV=1	1.253	0.284	2.63862e+06	4645789
CY1_MOUSE	Cytochrome c1, heme protein, mitochondrial OS=Mus musculus GN=Cyc1 PE=1 SV=1	1.253	9.282e-13	4156811	5241018
MCM6_MOUSE	DNA replication licensing factor MCM6 OS=Mus musculus GN=Mcm6 PE=1 SV=1	1.251	5.945e-08	3553737	4.38165e+06
MLXIP_MOUSE	MLX-interacting protein OS=Mus musculus GN=Mlxip PE=1 SV=1	1.251	1.389e-10	4056345	5.12908e+06
SAC1_MOUSE	Phosphatidylinositide phosphatase SAC1 OS=Mus musculus GN=Sacm1l PE=2 SV=1	1.25	6.879e-07	4149523	5.16168e+06
TMM11_MOUSE	Transmembrane protein 11, mitochondrial OS=Mus musculus GN=Tmem11 PE=2 SV=1	1.25	0.011	2.33746e+06	2.83858e+06
KISHA_MOUSE	Protein kish-A OS=Mus musculus GN=Tmem167a PE=2 SV=1	1.25	5.282e-05	4.99192e+06	6244909
K0090_MOUSE	Uncharacterized protein KIAA0090 OS=Mus musculus GN=Kiaa0090 PE=1 SV=1	1.249	0.035	1.18035e+06	1.51217e+06
GNL3_MOUSE	Guanine nucleotide-binding protein-like 3 OS=Mus musculus GN=Gnl3 PE=1 SV=2	1.249	0.138	253730	295153
CX4NB_MOUSE	Neighbor of COX4 OS=Mus musculus GN=Cox4nb PE=1 SV=1	1.249	0.027	3.84151e+06	4781480
DOPP1_MOUSE	Dolichyldiphosphatase 1 OS=Mus musculus GN=Dolpp1 PE=2 SV=1	1.248	0.124	298417	372430
CATA_MOUSE	Catalase OS=Mus musculus GN=Cat PE=1 SV=3	1.248	3.562e-07	2.54456e+06	3148465
RECQ1_MOUSE	ATP-dependent DNA helicase Q1 OS=Mus musculus GN=Recql PE=1 SV=1	1.246	0.175	968555	1.21086e+06
PIGN_MOUSE	Isoform 2 of GPI ethanolamine phosphate transferase 1 OS=Mus musculus GN=Pign	1.246	8.224e-06	1.36736e+06	1.69503e+06
SR140_MOUSE	Isoform 2 of U2 snRNP-associated SURP motif-containing protein OS=Mus musculus GN=U2surp	1.245	0.0008596	3.11695e+06	3875657
B4GN1_MOUSE	Beta-1,4 N-acetylgalactosaminyltransferase 1 OS=Mus musculus GN=B4galnt1 PE=2 SV=1	1.245	0.01	655530	815843
U5S1_MOUSE	116 kDa U5 small nuclear ribonucleoprotein component OS=Mus musculus GN=Eftud2 PE=2 SV=1	1.243	1.52e-05	1.7259e+06	2.13499e+06
NACC1_MOUSE	Nucleus accumbens-associated protein 1 OS=Mus musculus GN=Nacc1 PE=2 SV=1	1.243	0.037	819180	1.0489e+06
STT3B_MOUSE	Dolichyl-diphosphooligosaccharide--protein glycosyltransferase subunit STT3B OS=Mus musculus GN=Stt3b PE=1 SV=2	1.242	4.287e-16	9262051	11440910
TSN31_MOUSE	Tetraspanin-31 OS=Mus musculus GN=Tspan31 PE=1 SV=1	1.242	0.0001307	5.27679e+06	6551508
RFC2_MOUSE	Replication factor C subunit 2 OS=Mus musculus GN=Rfc2 PE=2 SV=1	1.24	0.016	3626221	4316428
ACLY_MOUSE	ATP-citrate synthase OS=Mus musculus GN=Acly PE=1 SV=1	1.237	0.703	2.44821e+06	1.77659e+06
PLRG1_MOUSE	Pleiotropic regulator 1 OS=Mus musculus GN=Plrg1 PE=2 SV=1	1.236	0.0007065	4633442	5.61271e+06
APEX1_MOUSE	DNA-(apurinic or apyrimidinic site) lyase OS=Mus musculus GN=Apex1 PE=1 SV=2	1.235	6.463e-12	4.86761e+06	6064257
S23A2_MOUSE	Solute carrier family 23 member 2 OS=Mus musculus GN=Slc23a2 PE=1 SV=2	1.235	0.213	223131	274796
SPTC2_MOUSE	Serine palmitoyltransferase 2 OS=Mus musculus GN=Sptlc2 PE=2 SV=2	1.232	0.0009079	1.14649e+06	1.36924e+06
NOM1_MOUSE	Nucleolar MIF4G domain-containing protein 1 OS=Mus musculus GN=Nom1 PE=2 SV=1	1.231	0.089	857342	1.05689e+06
CDKA1_MOUSE	Cyclin-dependent kinase 2-associated protein 1 OS=Mus musculus GN=Cdk2ap1 PE=3 SV=2	1.231	0.18	223003	274415
SURF4_MOUSE	Surfeit locus protein 4 OS=Mus musculus GN=Surf4 PE=2 SV=1	1.229	0.173	559320	687405
NSDHL_MOUSE	Sterol-4-alpha-carboxylate 3-dehydrogenase, decarboxylating OS=Mus musculus GN=Nsdhl PE=2 SV=1	1.227	0.0001413	994865	1.2421e+06
FAM3C_MOUSE	Protein FAM3C OS=Mus musculus GN=Fam3c PE=1 SV=1	1.226	0.005	4724130	5801874
NOL9_MOUSE	Isoform 2 of Polynucleotide 5'-hydroxyl-kinase NOL9 OS=Mus musculus GN=Nol9	1.224	0.18	258208	316079
PHF12_MOUSE	PHD finger protein 12 OS=Mus musculus GN=Phf12 PE=2 SV=1	1.224	0.062	2.52176e+06	3.08492e+06
ENV1_MOUSE	MLV-related proviral Env polyprotein OS=Mus musculus PE=2 SV=3	1.224	0.089	6.76506e+06	8257085
ACTN4_MOUSE	Alpha-actinin-4 OS=Mus musculus GN=Actn4 PE=1 SV=1	1.223	0.075	1.7152e+06	2648611
RPR1B_MOUSE	Regulation of nuclear pre-mRNA domain-containing protein 1B OS=Mus musculus GN=Rprd1b PE=2 SV=2	1.222	0.068	669613	818034
SRSF1_MOUSE	Isoform 2 of Serine/arginine-rich splicing factor 1 OS=Mus musculus GN=Srsf1	1.22	0.013	2.7697e+06	3416150
OST48_MOUSE	Dolichyl-diphosphooligosaccharide--protein glycosyltransferase 48 kDa subunit OS=Mus musculus GN=Ddost PE=1 SV=1	1.219	1.126e-06	2.61277e+06	3.17581e+06
PK1IP_MOUSE	p21-activated protein kinase-interacting protein 1 OS=Mus musculus GN=Pak1ip1 PE=2 SV=2	1.218	8.23e-06	3460744	4214336
HMGB2_MOUSE	High mobility group protein B2 OS=Mus musculus GN=Hmgb2 PE=1 SV=3	1.217	5.807e-06	9814288	12119512
FLI1_MOUSE	Friend leukemia integration 1 transcription factor OS=Mus musculus GN=Fli1 PE=1 SV=1	1.216	0.046	3516619	4.18827e+06
TIF1B_MOUSE	Transcription intermediary factor 1-beta OS=Mus musculus GN=Trim28 PE=1 SV=3	1.215	8.645e-09	6493183	7847751
MUTA_MOUSE	Methylmalonyl-CoA mutase, mitochondrial OS=Mus musculus GN=Mut PE=2 SV=1	1.213	0.132	1.24308e+06	1.42911e+06
CAMLG_MOUSE	Calcium signal-modulating cyclophilin ligand OS=Mus musculus GN=Camlg PE=1 SV=2	1.211	0.243	194892	235919
SMD3_MOUSE	Small nuclear ribonucleoprotein Sm D3 OS=Mus musculus GN=Snrpd3 PE=1 SV=1	1.21	9.499e-10	7399398	8987308
LA_MOUSE	Lupus La protein homolog OS=Mus musculus GN=Ssb PE=2 SV=1	1.21	7.326e-06	957069	1.15042e+06
MCM2_MOUSE	DNA replication licensing factor MCM2 OS=Mus musculus GN=Mcm2 PE=1 SV=3	1.208	6.739e-07	3.04519e+06	3.59519e+06
SF3A1_MOUSE	Splicing factor 3A subunit 1 OS=Mus musculus GN=Sf3a1 PE=1 SV=1	1.208	1.291e-08	6.98519e+06	8395638
DHC24_MOUSE	Delta(24)-sterol reductase OS=Mus musculus GN=Dhcr24 PE=2 SV=1	1.206	1.809e-06	7.22145e+06	8579764
MCM5_MOUSE	DNA replication licensing factor MCM5 OS=Mus musculus GN=Mcm5 PE=2 SV=1	1.206	0.0003274	4.3895e+06	5375935
MOGS_MOUSE	Mannosyl-oligosaccharide glucosidase OS=Mus musculus GN=Mogs PE=2 SV=1	1.206	0.0002355	5056146	6292640
RLGPB_MOUSE	Ral GTPase-activating protein subunit beta OS=Mus musculus GN=Ralgapb PE=1 SV=2	1.205	0.41	121311	146124
CISD2_MOUSE	CDGSH iron-sulfur domain-containing protein 2 OS=Mus musculus GN=Cisd2 PE=1 SV=1	1.204	8.889e-10	2425681	2.90004e+06
CSTF1_MOUSE	Cleavage stimulation factor subunit 1 OS=Mus musculus GN=Cstf1 PE=2 SV=1	1.201	1.027e-05	3.06693e+06	3674973
RFC4_MOUSE	Replication factor C subunit 4 OS=Mus musculus GN=Rfc4 PE=1 SV=1	1.201	0.0002208	595844	720066
ZADH2_MOUSE	Zinc-binding alcohol dehydrogenase domain-containing protein 2 OS=Mus musculus GN=Zadh2 PE=2 SV=1	1.2	0.226	1.43167e+06	1.71549e+06
PTN1_MOUSE	Tyrosine-protein phosphatase non-receptor type 1 OS=Mus musculus GN=Ptpn1 PE=1 SV=2	1.199	0.003	1.72987e+06	2.07317e+06
DHX15_MOUSE	Putative pre-mRNA-splicing factor ATP-dependent RNA helicase DHX15 OS=Mus musculus GN=Dhx15 PE=2 SV=2	1.198	1.643e-12	5.3957e+06	6509504
ERH_MOUSE	Enhancer of rudimentary homolog OS=Mus musculus GN=Erh PE=1 SV=1	1.198	2.823e-06	2686138	3201790
SLAI1_MOUSE	SLAIN motif-containing protein 1 OS=Mus musculus GN=Slain1 PE=2 SV=1	1.197	0.079	2.12355e+06	2548167
EF1D_MOUSE	Isoform 3 of Elongation factor 1-delta OS=Mus musculus GN=Eef1d	1.196	0.012	2.63715e+06	3.21886e+06
STT3A_MOUSE	Dolichyl-diphosphooligosaccharide--protein glycosyltransferase subunit STT3A OS=Mus musculus GN=Stt3a PE=1 SV=1	1.193	1.836e-05	9476810	11249308
3BP1_MOUSE	SH3 domain-binding protein 1 OS=Mus musculus GN=Sh3bp1 PE=1 SV=1	1.192	0.038	1150155	1.37127e+06
VIME_MOUSE	Vimentin OS=Mus musculus GN=Vim PE=1 SV=3	1.192	0.007	3.41303e+06	3.89433e+06
BLVRB_MOUSE	Flavin reductase OS=Mus musculus GN=Blvrb PE=2 SV=3	1.192	0.393	920346	1.09128e+06
NUPL2_MOUSE	Nucleoporin-like protein 2 OS=Mus musculus GN=Nupl2 PE=2 SV=1	1.192	0.066	817365	974296
RU17_MOUSE	U1 small nuclear ribonucleoprotein 70 kDa OS=Mus musculus GN=Snrnp70 PE=1 SV=2	1.191	9.602e-06	3182408	3761750
EMSY_MOUSE	Isoform 2 of Protein EMSY OS=Mus musculus GN=Emsy	1.191	0.036	928988	1.10604e+06
PRP4_MOUSE	U4/U6 small nuclear ribonucleoprotein Prp4 OS=Mus musculus GN=Prpf4 PE=2 SV=1	1.191	0.002	2.35454e+06	2.70652e+06
HASP_MOUSE	Serine/threonine-protein kinase haspin OS=Mus musculus GN=Gsg2 PE=1 SV=3	1.189	0.339	155438	184841
TF3C1_MOUSE	General transcription factor 3C polypeptide 1 OS=Mus musculus GN=Gtf3c1 PE=2 SV=2	1.189	0.2	1.14774e+06	1.25371e+06
RAGP1_MOUSE	Ran GTPase-activating protein 1 OS=Mus musculus GN=Rangap1 PE=1 SV=1	1.187	0.117	678272	775400
SF3A3_MOUSE	Splicing factor 3A subunit 3 OS=Mus musculus GN=Sf3a3 PE=2 SV=2	1.187	0.058	2.42895e+06	2.77942e+06
SYMC_MOUSE	Methionyl-tRNA synthetase, cytoplasmic OS=Mus musculus GN=Mars PE=2 SV=1	1.187	0.696	1.72938e+06	2.52816e+06
UBF1_MOUSE	Nucleolar transcription factor 1 OS=Mus musculus GN=Ubtf PE=1 SV=1	1.187	0.234	517552	614024
SMD1_MOUSE	Small nuclear ribonucleoprotein Sm D1 OS=Mus musculus GN=Snrpd1 PE=2 SV=1	1.186	6.329e-08	762418	904539
ACINU_MOUSE	Isoform 2 of Apoptotic chromatin condensation inducer in the nucleus OS=Mus musculus GN=Acin1	1.186	0.27	256714	304290
ITF2_MOUSE	Isoform 1 of Transcription factor 4 OS=Mus musculus GN=Tcf4	1.185	0.013	1.92922e+06	2.28618e+06
RAB5C_MOUSE	Ras-related protein Rab-5C OS=Mus musculus GN=Rab5c PE=1 SV=2	1.185	0.016	3.54531e+06	4365576
WAC_MOUSE	WW domain-containing adapter protein with coiled-coil OS=Mus musculus GN=Wac PE=1 SV=2	1.185	0.0001532	7.58555e+06	9154066
VIR_MOUSE	Protein virilizer homolog OS=Mus musculus GN=Kiaa1429 PE=1 SV=1	1.185	0.157	628393	744259
SSBP2_MOUSE	Single-stranded DNA-binding protein 2 OS=Mus musculus GN=Ssbp2 PE=2 SV=1	1.185	0.087	4271478	4792823
SMC4_MOUSE	Structural maintenance of chromosomes protein 4 OS=Mus musculus GN=Smc4 PE=2 SV=1	1.184	0.015	1.85768e+06	2198416
DHB12_MOUSE	Estradiol 17-beta-dehydrogenase 12 OS=Mus musculus GN=Hsd17b12 PE=2 SV=1	1.184	7.368e-06	4284970	5.07365e+06
ERGI1_MOUSE	Endoplasmic reticulum-Golgi intermediate compartment protein 1 OS=Mus musculus GN=Ergic1 PE=1 SV=1	1.183	0.053	963756	1.13982e+06
FNBP4_MOUSE	Formin-binding protein 4 OS=Mus musculus GN=Fnbp4 PE=1 SV=2	1.183	0.134	691167	818528
HAGHL_MOUSE	Hydroxyacylglutathione hydrolase-like protein OS=Mus musculus GN=Haghl PE=2 SV=1	1.182	0.096	14491924	17161546
MCM7_MOUSE	DNA replication licensing factor MCM7 OS=Mus musculus GN=Mcm7 PE=2 SV=1	1.181	0.0006803	3070336	3531931
CPSF6_MOUSE	Cleavage and polyadenylation specificity factor subunit 6 OS=Mus musculus GN=Cpsf6 PE=1 SV=1	1.181	0.339	1.20543e+06	1.39151e+06
CPSF3_MOUSE	Cleavage and polyadenylation specificity factor subunit 3 OS=Mus musculus GN=Cpsf3 PE=2 SV=1	1.179	0.002	1.17711e+06	1.37448e+06
RDH11_MOUSE	Retinol dehydrogenase 11 OS=Mus musculus GN=Rdh11 PE=2 SV=2	1.179	1.385e-07	6856126	8112971
TTF2_MOUSE	Transcription termination factor 2 OS=Mus musculus GN=Ttf2 PE=1 SV=2	1.179	0.245	221590	256985
TEX10_MOUSE	Testis-expressed sequence 10 protein OS=Mus musculus GN=Tex10 PE=2 SV=1	1.178	0.111	419300	494125
SSRP1_MOUSE	FACT complex subunit SSRP1 OS=Mus musculus GN=Ssrp1 PE=1 SV=2	1.175	0.021	1.55252e+06	1824635
FUT8_MOUSE	Alpha-(1,6)-fucosyltransferase OS=Mus musculus GN=Fut8 PE=2 SV=1	1.175	0.21	2.87551e+06	3.16297e+06
GP125_MOUSE	Probable G-protein coupled receptor 125 OS=Mus musculus GN=Gpr125 PE=2 SV=2	1.173	0.178	558635	676198
TMM33_MOUSE	Transmembrane protein 33 OS=Mus musculus GN=Tmem33 PE=2 SV=1	1.17	1.714e-05	5300076	6201701
RSMN_MOUSE	Small nuclear ribonucleoprotein-associated protein N OS=Mus musculus GN=Snrpn PE=2 SV=1	1.17	4.786e-10	9080668	10578520
CLAP1_MOUSE	Isoform 2 of CLIP-associating protein 1 OS=Mus musculus GN=Clasp1	1.168	0.322	373754	435782
THOC5_MOUSE	THO complex subunit 5 homolog OS=Mus musculus GN=Thoc5 PE=1 SV=2	1.167	0.079	1.00159e+06	1.14767e+06
LRC59_MOUSE	Leucine-rich repeat-containing protein 59 OS=Mus musculus GN=Lrrc59 PE=2 SV=1	1.166	4.316e-06	3.35724e+06	3.87101e+06
DPOA2_MOUSE	DNA polymerase alpha subunit B OS=Mus musculus GN=Pola2 PE=1 SV=2	1.166	0.001	17005824	19827988
S39A7_MOUSE	Zinc transporter SLC39A7 OS=Mus musculus GN=Slc39a7 PE=1 SV=2	1.166	0.002	5001015	5863907
NFYB_MOUSE	Nuclear transcription factor Y subunit beta OS=Mus musculus GN=Nfyb PE=1 SV=1	1.165	0.396	141424	164723
PIAS1_MOUSE	E3 SUMO-protein ligase PIAS1 OS=Mus musculus GN=Pias1 PE=1 SV=2	1.165	0.0001305	2266880	2.65763e+06
AT2A3_MOUSE	Sarcoplasmic/endoplasmic reticulum calcium ATPase 3 OS=Mus musculus GN=Atp2a3 PE=2 SV=2	1.164	4.377e-06	4765502	5718877
SF3B1_MOUSE	Splicing factor 3B subunit 1 OS=Mus musculus GN=Sf3b1 PE=1 SV=1	1.163	0.0009719	5.0788e+06	5.97279e+06
EMIL2_MOUSE	EMILIN-2 OS=Mus musculus GN=Emilin2 PE=1 SV=1	1.163	0.074	3.9728e+06	4.86682e+06
ITM2C_MOUSE	Integral membrane protein 2C OS=Mus musculus GN=Itm2c PE=1 SV=2	1.163	0.312	776871	902188
DAD1_MOUSE	Dolichyl-diphosphooligosaccharide--protein glycosyltransferase subunit DAD1 OS=Mus musculus GN=Dad1 PE=2 SV=3	1.162	0.002	6999276	8.22856e+06
TM214_MOUSE	Transmembrane protein 214 OS=Mus musculus GN=Tmem214 PE=2 SV=1	1.162	0.293	2321416	2.4303e+06
PREB_MOUSE	Prolactin regulatory element-binding protein OS=Mus musculus GN=Preb PE=1 SV=1	1.159	0.436	1.14658e+06	1.41286e+06
MBOA7_MOUSE	Lysophospholipid acyltransferase 7 OS=Mus musculus GN=Mboat7 PE=2 SV=1	1.159	0.001	2.60446e+06	2.99479e+06
FIP1_MOUSE	Pre-mRNA 3'-end-processing factor FIP1 OS=Mus musculus GN=Fip1l1 PE=1 SV=1	1.159	0.002	7.60228e+06	8432457
CPSF1_MOUSE	Cleavage and polyadenylation specificity factor subunit 1 OS=Mus musculus GN=Cpsf1 PE=1 SV=1	1.157	0.12	1.11955e+06	1.28466e+06
CH055_MOUSE	UPF0670 protein C8orf55 homolog OS=Mus musculus PE=2 SV=1	1.157	0.001	3916957	4494280
CIC_MOUSE	Protein capicua homolog OS=Mus musculus GN=Cic PE=1 SV=2	1.157	0.009	3548568	4.10116e+06
SPTC1_MOUSE	Serine palmitoyltransferase 1 OS=Mus musculus GN=Sptlc1 PE=2 SV=1	1.157	0.169	1.43237e+06	1.65258e+06
GTF2I_MOUSE	Isoform 2 of General transcription factor II-I OS=Mus musculus GN=Gtf2i	1.156	0.192	474117	548041
CDC16_MOUSE	Cell division cycle protein 16 homolog OS=Mus musculus GN=Cdc16 PE=2 SV=1	1.155	0.009	1954888	2255933
WDR12_MOUSE	Ribosome biogenesis protein WDR12 OS=Mus musculus GN=Wdr12 PE=2 SV=1	1.154	0.009	2.82493e+06	3201649
PRP19_MOUSE	Isoform 2 of Pre-mRNA-processing factor 19 OS=Mus musculus GN=Prpf19	1.152	4.379e-09	9379335	10675856
PP1G_MOUSE	Serine/threonine-protein phosphatase PP1-gamma catalytic subunit OS=Mus musculus GN=Ppp1cc PE=1 SV=1	1.152	4.745e-05	5680677	6.54379e+06
SP16H_MOUSE	FACT complex subunit SPT16 OS=Mus musculus GN=Supt16h PE=1 SV=2	1.152	0.029	2.94493e+06	3.15801e+06
ECH1_MOUSE	Delta(3,5)-Delta(2,4)-dienoyl-CoA isomerase, mitochondrial OS=Mus musculus GN=Ech1 PE=2 SV=1	1.15	0.113	1.36698e+06	1.57188e+06
CNDD3_MOUSE	Condensin-2 complex subunit D3 OS=Mus musculus GN=Ncapd3 PE=1 SV=2	1.15	0.192	658616	781762
FUBP1_MOUSE	Far upstream element-binding protein 1 OS=Mus musculus GN=Fubp1 PE=1 SV=1	1.15	0.114	5426640	6.05775e+06
MEF2D_MOUSE	Myocyte-specific enhancer factor 2D OS=Mus musculus GN=Mef2d PE=1 SV=1	1.149	0.036	8.12814e+06	8971365
ATF2_MOUSE	Isoform 2 of Cyclic AMP-dependent transcription factor ATF-2 OS=Mus musculus GN=Atf2	1.149	0.081	2060019	2.36708e+06
PRP8_MOUSE	Pre-mRNA-processing-splicing factor 8 OS=Mus musculus GN=Prpf8 PE=1 SV=2	1.148	3.899e-07	5.24154e+06	5966895
PIGU_MOUSE	Phosphatidylinositol glycan anchor biosynthesis class U protein OS=Mus musculus GN=Pigu PE=2 SV=4	1.147	0.0003084	1.13571e+06	1.3042e+06
BOP1_MOUSE	Ribosome biogenesis protein BOP1 OS=Mus musculus GN=Bop1 PE=1 SV=1	1.147	0.0007608	2348189	2674422
DHCR7_MOUSE	7-dehydrocholesterol reductase OS=Mus musculus GN=Dhcr7 PE=2 SV=1	1.144	2.489e-06	7.32895e+06	8417911
MCM4_MOUSE	DNA replication licensing factor MCM4 OS=Mus musculus GN=Mcm4 PE=2 SV=1	1.143	0.027	2099646	2623742
CPSF7_MOUSE	Cleavage and polyadenylation specificity factor subunit 7 OS=Mus musculus GN=Cpsf7 PE=1 SV=2	1.142	0.005	1.55831e+06	1.78191e+06
TCRG1_MOUSE	Transcription elongation regulator 1 OS=Mus musculus GN=Tcerg1 PE=1 SV=2	1.141	0.0001571	5285861	6.09717e+06
HDAC6_MOUSE	Histone deacetylase 6 OS=Mus musculus GN=Hdac6 PE=1 SV=2	1.14	0.145	471779	537801
TECR_MOUSE	Trans-2,3-enoyl-CoA reductase OS=Mus musculus GN=Tecr PE=1 SV=1	1.14	0.005	6.35912e+06	7238475
NFE2_MOUSE	Transcription factor NF-E2 45 kDa subunit OS=Mus musculus GN=Nfe2 PE=1 SV=1	1.139	0.008	2347191	2.67461e+06
CDC5L_MOUSE	Cell division cycle 5-related protein OS=Mus musculus GN=Cdc5l PE=1 SV=2	1.137	0.039	1.34464e+06	1550559
NCOA5_MOUSE	Nuclear receptor coactivator 5 OS=Mus musculus GN=Ncoa5 PE=1 SV=1	1.137	0.005	1.99227e+06	2.26308e+06
NUP93_MOUSE	Nuclear pore complex protein Nup93 OS=Mus musculus GN=Nup93 PE=2 SV=1	1.137	0.035	4.0764e+06	4586006
ASH2L_MOUSE	Set1/Ash2 histone methyltransferase complex subunit ASH2 OS=Mus musculus GN=Ash2l PE=1 SV=1	1.136	0.172	594290	661118
TOIP1_MOUSE	Torsin-1A-interacting protein 1 OS=Mus musculus GN=Tor1aip1 PE=1 SV=1	1.135	0.086	2.06249e+06	2.34139e+06
DDX56_MOUSE	Probable ATP-dependent RNA helicase DDX56 OS=Mus musculus GN=Ddx56 PE=2 SV=1	1.134	0.003	1.69738e+06	1.88614e+06
SIL1_MOUSE	Nucleotide exchange factor SIL1 OS=Mus musculus GN=Sil1 PE=1 SV=2	1.133	0.531	901270	1.3069e+06
NUP62_MOUSE	Nuclear pore glycoprotein p62 OS=Mus musculus GN=Nup62 PE=1 SV=2	1.132	1.625e-07	11530325	13172289
PTBP1_MOUSE	Polypyrimidine tract-binding protein 1 OS=Mus musculus GN=Ptbp1 PE=1 SV=2	1.131	0.021	8530859	9414156
TMCO1_MOUSE	Transmembrane and coiled-coil domain-containing protein 1 OS=Mus musculus GN=Tmco1 PE=2 SV=1	1.129	0.302	2.96401e+06	3.70049e+06
CNNM3_MOUSE	Metal transporter CNNM3 OS=Mus musculus GN=Cnnm3 PE=1 SV=2	1.129	0.619	187813	211578
INCE_MOUSE	Inner centromere protein OS=Mus musculus GN=Incenp PE=1 SV=2	1.128	0.275	395826	446665
CATB_MOUSE	Cathepsin B OS=Mus musculus GN=Ctsb PE=1 SV=2	1.128	0.437	2.97093e+06	3.53758e+06
ZEP2_MOUSE	Transcription factor HIVEP2 OS=Mus musculus GN=Hivep2 PE=1 SV=1	1.128	0.319	1.52194e+06	1.71871e+06
PRAF2_MOUSE	PRA1 family protein 2 OS=Mus musculus GN=Praf2 PE=2 SV=1	1.128	0.035	2.02415e+06	2.28361e+06
ACADS_MOUSE	Short-chain specific acyl-CoA dehydrogenase, mitochondrial OS=Mus musculus GN=Acads PE=2 SV=1	1.127	0.2	1.36114e+06	1.59575e+06
ZMYM4_MOUSE	Zinc finger MYM-type protein 4 OS=Mus musculus GN=Zmym4 PE=1 SV=1	1.126	0.097	2.98897e+06	3.4999e+06
TRI33_MOUSE	E3 ubiquitin-protein ligase TRIM33 OS=Mus musculus GN=Trim33 PE=2 SV=2	1.126	0.679	2.10535e+06	2.35315e+06
BUB3_MOUSE	Mitotic checkpoint protein BUB3 OS=Mus musculus GN=Bub3 PE=2 SV=1	1.125	0.009	8.04805e+06	8856794
SCAF8_MOUSE	Protein SCAF8 OS=Mus musculus GN=Scaf8 PE=1 SV=1	1.125	0.011	4.44124e+06	4.94271e+06
PTSS1_MOUSE	Phosphatidylserine synthase 1 OS=Mus musculus GN=Ptdss1 PE=2 SV=1	1.124	0.082	1.88324e+06	2.1171e+06
INT10_MOUSE	Integrator complex subunit 10 OS=Mus musculus GN=Ints10 PE=1 SV=3	1.124	0.058	1614879	1.81508e+06
ZHX2_MOUSE	Zinc fingers and homeoboxes protein 2 OS=Mus musculus GN=Zhx2 PE=1 SV=1	1.124	0.006	3.82962e+06	4.32212e+06
RBM10_MOUSE	Isoform 2 of RNA-binding protein 10 OS=Mus musculus GN=Rbm10	1.122	0.083	2159950	2.42236e+06
PSL1_MOUSE	Signal peptide peptidase-like 2B OS=Mus musculus GN=Sppl2b PE=2 SV=2	1.121	0.526	224480	251817
HIBCH_MOUSE	3-hydroxyisobutyryl-CoA hydrolase, mitochondrial OS=Mus musculus GN=Hibch PE=1 SV=1	1.12	0.165	1.22628e+06	1.37344e+06
CTBP2_MOUSE	C-terminal-binding protein 2 OS=Mus musculus GN=Ctbp2 PE=1 SV=2	1.119	0.156	3.02666e+06	3.38946e+06
HACD3_MOUSE	3-hydroxyacyl-CoA dehydratase 3 OS=Mus musculus GN=ptplad1 PE=1 SV=2	1.118	0.424	1.76845e+06	1.99851e+06
HNRH1_MOUSE	Heterogeneous nuclear ribonucleoprotein H OS=Mus musculus GN=Hnrnph1 PE=1 SV=3	1.117	0.016	13211704	14383874
ZFP62_MOUSE	Isoform 2 of Zinc finger protein 62 OS=Mus musculus GN=Zfp62	1.117	0.296	913376	1.03073e+06
CATC_MOUSE	Dipeptidyl peptidase 1 OS=Mus musculus GN=Ctsc PE=2 SV=1	1.117	0.02	6.19937e+06	6.87702e+06
HEXB_MOUSE	Beta-hexosaminidase subunit beta OS=Mus musculus GN=Hexb PE=2 SV=2	1.116	0.049	4003507	4517556
EVI1_MOUSE	MDS1 and EVI1 complex locus protein EVI1 OS=Mus musculus GN=Mecom PE=1 SV=1	1.115	0.485	1.63168e+06	1.86797e+06
ATX1_MOUSE	Ataxin-1 OS=Mus musculus GN=Atxn1 PE=1 SV=2	1.113	0.035	1.46676e+06	1.64558e+06
MPRD_MOUSE	Cation-dependent mannose-6-phosphate receptor OS=Mus musculus GN=M6pr PE=1 SV=1	1.113	0.229	5980755	6581409
RPA2_MOUSE	DNA-directed RNA polymerase I subunit RPA2 OS=Mus musculus GN=Polr1b PE=2 SV=1	1.112	0.377	509634	566645
WDR5_MOUSE	WD repeat-containing protein 5 OS=Mus musculus GN=Wdr5 PE=1 SV=1	1.112	0.089	5.41849e+06	5813712
RBBP6_MOUSE	E3 ubiquitin-protein ligase RBBP6 OS=Mus musculus GN=Rbbp6 PE=1 SV=5	1.111	0.278	2.213e+06	2.40245e+06
ORC4_MOUSE	Origin recognition complex subunit 4 OS=Mus musculus GN=Orc4 PE=1 SV=1	1.111	0.237	460293	510118
SMC6_MOUSE	Structural maintenance of chromosomes protein 6 OS=Mus musculus GN=Smc6 PE=2 SV=1	1.11	0.503	392460	435473
PEBB_MOUSE	Isoform 2 of Core-binding factor subunit beta OS=Mus musculus GN=Cbfb	1.11	0.114	2479694	2.75226e+06
MLEC_MOUSE	Malectin OS=Mus musculus GN=Mlec PE=2 SV=2	1.109	0.005	2.96449e+06	3287204
NUP50_MOUSE	Nuclear pore complex protein Nup50 OS=Mus musculus GN=Nup50 PE=1 SV=2	1.109	0.312	773074	857194
API5_MOUSE	Apoptosis inhibitor 5 OS=Mus musculus GN=Api5 PE=2 SV=1	1.109	0.712	1.64545e+06	1.82382e+06
SPCS2_MOUSE	Signal peptidase complex subunit 2 OS=Mus musculus GN=Spcs2 PE=2 SV=1	1.104	0.107	2.46863e+06	2.72413e+06
MBOA5_MOUSE	Lysophospholipid acyltransferase 5 OS=Mus musculus GN=Lpcat3 PE=1 SV=1	1.103	0.0003779	10016328	10884757
GFI1B_MOUSE	Zinc finger protein Gfi-1b OS=Mus musculus GN=Gfi1b PE=1 SV=1	1.099	0.276	2.60286e+06	2.87353e+06
MD1L1_MOUSE	Mitotic spindle assembly checkpoint protein MAD1 OS=Mus musculus GN=Mad1l1 PE=2 SV=1	1.098	0.001	12280885	13484747
FOXK2_MOUSE	Forkhead box protein K2 OS=Mus musculus GN=Foxk2 PE=2 SV=2	1.098	0.001	10595510	11519219
ZNF48_MOUSE	Zinc finger protein 48 OS=Mus musculus GN=Znf48 PE=2 SV=2	1.097	0.493	530191	580941
HKDC1_MOUSE	Putative hexokinase HKDC1 OS=Mus musculus GN=Hkdc1 PE=2 SV=1	1.096	0.018	19519706	21392978
CBPD_MOUSE	Carboxypeptidase D OS=Mus musculus GN=Cpd PE=1 SV=1	1.095	0.175	2.05555e+06	2116308
RAD50_MOUSE	Isoform 2 of DNA repair protein RAD50 OS=Mus musculus GN=Rad50	1.095	0.712	205364	224182
PHF6_MOUSE	PHD finger protein 6 OS=Mus musculus GN=Phf6 PE=1 SV=1	1.094	0.006	3.94181e+06	4323852
NPAT_MOUSE	Protein NPAT OS=Mus musculus GN=Npat PE=2 SV=2	1.094	0.522	1.01772e+06	1.26144e+06
NUP37_MOUSE	Nucleoporin Nup37 OS=Mus musculus GN=Nup37 PE=2 SV=1	1.094	0.119	3777486	4.39938e+06
NEP1_MOUSE	Ribosomal RNA small subunit methyltransferase NEP1 OS=Mus musculus GN=Emg1 PE=1 SV=1	1.093	0.47	1.43583e+06	1.6567e+06
HNRPK_MOUSE	Isoform 2 of Heterogeneous nuclear ribonucleoprotein K OS=Mus musculus GN=Hnrnpk	1.093	0.007	4.5235e+06	4.96962e+06
DDX17_MOUSE	Probable ATP-dependent RNA helicase DDX17 OS=Mus musculus GN=Ddx17 PE=2 SV=1	1.092	0.005	14228771	15432940
DDX5_MOUSE	Probable ATP-dependent RNA helicase DDX5 OS=Mus musculus GN=Ddx5 PE=1 SV=1	1.091	0.078	9114604	9707898
MRE11_MOUSE	Double-strand break repair protein MRE11A OS=Mus musculus GN=Mre11a PE=2 SV=1	1.091	0.105	1635899	1784141
REEP4_MOUSE	Receptor expression-enhancing protein 4 OS=Mus musculus GN=Reep4 PE=2 SV=1	1.09	0.332	1.12829e+06	1.2301e+06
CNDG2_MOUSE	Condensin-2 complex subunit G2 OS=Mus musculus GN=Ncapg2 PE=2 SV=1	1.09	0.157	1.24468e+06	1.28783e+06
NH2L1_MOUSE	NHP2-like protein 1 OS=Mus musculus GN=Nhp2l1 PE=2 SV=4	1.089	0.174	5.41495e+06	5.55098e+06
SNR40_MOUSE	U5 small nuclear ribonucleoprotein 40 kDa protein OS=Mus musculus GN=Snrnp40 PE=2 SV=1	1.087	0.222	3.19447e+06	3.36102e+06
HNRPU_MOUSE	Heterogeneous nuclear ribonucleoprotein U OS=Mus musculus GN=Hnrnpu PE=1 SV=1	1.087	3.013e-05	28589760	30862148
TAF9_MOUSE	Transcription initiation factor TFIID subunit 9 OS=Mus musculus GN=Taf9 PE=2 SV=1	1.087	0.427	1559500	1.69526e+06
PESC_MOUSE	Pescadillo homolog OS=Mus musculus GN=Pes1 PE=1 SV=1	1.087	0.589	5.1775e+06	5890533
BEND3_MOUSE	BEN domain-containing protein 3 OS=Mus musculus GN=Bend3 PE=2 SV=1	1.086	0.653	252312	273880
DX39B_MOUSE	Spliceosome RNA helicase Ddx39b OS=Mus musculus GN=Ddx39b PE=1 SV=1	1.086	0.229	6649634	7.10599e+06
S12A6_MOUSE	Isoform 2 of Solute carrier family 12 member 6 OS=Mus musculus GN=Slc12a6	1.086	0.877	282249	306577
ZNT7_MOUSE	Zinc transporter 7 OS=Mus musculus GN=Slc30a7 PE=1 SV=1	1.084	0.031	7191549	7.68569e+06
MGN_MOUSE	Protein mago nashi homolog 1-related OS=Mus musculus GN=Magoh-rs1 PE=2 SV=1	1.084	0.228	3.80318e+06	4.12418e+06
RFC3_MOUSE	Replication factor C subunit 3 OS=Mus musculus GN=Rfc3 PE=2 SV=1	1.083	0.0001434	3807818	4.10117e+06
CDK12_MOUSE	Isoform 3 of Cyclin-dependent kinase 12 OS=Mus musculus GN=Cdk12	1.083	0.252	4.61545e+06	4967366
CALR_MOUSE	Calreticulin OS=Mus musculus GN=Calr PE=1 SV=1	1.083	0.705	5.73906e+06	6806047
TF3C4_MOUSE	General transcription factor 3C polypeptide 4 OS=Mus musculus GN=Gtf3c4 PE=1 SV=1	1.083	0.791	691173	761235
RFC1_MOUSE	Replication factor C subunit 1 OS=Mus musculus GN=Rfc1 PE=1 SV=2	1.082	0.457	399085	423474
PSPC1_MOUSE	Paraspeckle component 1 OS=Mus musculus GN=Pspc1 PE=1 SV=1	1.082	0.314	950197	1.08568e+06
MED14_MOUSE	Mediator of RNA polymerase II transcription subunit 14 OS=Mus musculus GN=Med14 PE=1 SV=1	1.082	0.279	3.38283e+06	3.54287e+06
CEPT1_MOUSE	Choline/ethanolaminephosphotransferase 1 OS=Mus musculus GN=Cept1 PE=2 SV=1	1.08	0.252	8218001	8884143
PORED_MOUSE	Probable polyprenol reductase OS=Mus musculus GN=Srd5a3 PE=2 SV=2	1.08	0.277	481333	526091
PSIP1_MOUSE	PC4 and SFRS1-interacting protein OS=Mus musculus GN=Psip1 PE=1 SV=1	1.08	0.508	618601	667663
MBD1_MOUSE	Isoform 2 of Methyl-CpG-binding domain protein 1 OS=Mus musculus GN=Mbd1	1.079	0.68	264454	274769
H11_MOUSE	Histone H1.1 OS=Mus musculus GN=Hist1h1a PE=2 SV=2	1.079	0.581	2866992	3.06801e+06
VPP1_MOUSE	Isoform A1-I of V-type proton ATPase 116 kDa subunit a isoform 1 OS=Mus musculus GN=Atp6v0a1	1.079	0.629	1.21695e+06	1.2004e+06
SMU1_MOUSE	WD40 repeat-containing protein SMU1 OS=Mus musculus GN=Smu1 PE=2 SV=2	1.078	0.167	2249418	2336315
TNR6A_MOUSE	Trinucleotide repeat-containing gene 6A protein OS=Mus musculus GN=Tnrc6a PE=1 SV=1	1.078	0.649	1.79529e+06	1.94564e+06
DDX47_MOUSE	Probable ATP-dependent RNA helicase DDX47 OS=Mus musculus GN=Ddx47 PE=2 SV=2	1.077	0.577	388129	418061
MEF2A_MOUSE	Isoform 2 of Myocyte-specific enhancer factor 2A OS=Mus musculus GN=Mef2a	1.075	0.326	5149547	5939893
RPB2_MOUSE	DNA-directed RNA polymerase II subunit RPB2 OS=Mus musculus GN=Polr2b PE=2 SV=2	1.074	0.253	3.18923e+06	3.45316e+06
SEH1_MOUSE	Nucleoporin SEH1 OS=Mus musculus GN=Seh1l PE=2 SV=1	1.073	0.07	3881131	4.16617e+06
CELF2_MOUSE	Isoform 11 of CUGBP Elav-like family member 2 OS=Mus musculus GN=Celf2	1.073	0.343	2468216	2.64875e+06
MED12_MOUSE	Mediator of RNA polymerase II transcription subunit 12 OS=Mus musculus GN=Med12 PE=2 SV=1	1.073	0.364	1.27691e+06	1.41213e+06
RCC2_MOUSE	Protein RCC2 OS=Mus musculus GN=Rcc2 PE=2 SV=1	1.071	0.002	10703967	11296324
NU188_MOUSE	Nucleoporin NUP188 homolog OS=Mus musculus GN=Nup188 PE=1 SV=2	1.071	0.312	2245860	2.34025e+06
PDIA6_MOUSE	Protein disulfide-isomerase A6 OS=Mus musculus GN=Pdia6 PE=1 SV=3	1.07	0.247	1.72773e+06	1.85484e+06
DDX49_MOUSE	Probable ATP-dependent RNA helicase DDX49 OS=Mus musculus GN=Ddx49 PE=2 SV=1	1.07	0.606	238476	255269
IMA2_MOUSE	Importin subunit alpha-2 OS=Mus musculus GN=Kpna2 PE=1 SV=2	1.07	0.125	2.21239e+06	2.36683e+06
AT2A2_MOUSE	Sarcoplasmic/endoplasmic reticulum calcium ATPase 2 OS=Mus musculus GN=Atp2a2 PE=1 SV=2	1.07	0.456	4.77832e+06	5.02899e+06
NFYA_MOUSE	Nuclear transcription factor Y subunit alpha OS=Mus musculus GN=Nfya PE=1 SV=2	1.069	0.518	1.56506e+06	1713766
UHRF2_MOUSE	E3 ubiquitin-protein ligase UHRF2 OS=Mus musculus GN=Uhrf2 PE=1 SV=1	1.067	0.745	129995	138631
NCOA6_MOUSE	Nuclear receptor coactivator 6 OS=Mus musculus GN=Ncoa6 PE=1 SV=1	1.066	0.381	2.78845e+06	2852654
B4GT1_MOUSE	Beta-1,4-galactosyltransferase 1 OS=Mus musculus GN=B4galt1 PE=1 SV=1	1.066	0.641	2.0075e+06	2137473
RBPS2_MOUSE	RNA-binding protein with multiple splicing 2 OS=Mus musculus GN=Rbpms2 PE=1 SV=1	1.065	0.144	4607360	4.90622e+06
LY6E_MOUSE	Lymphocyte antigen 6E OS=Mus musculus GN=Ly6e PE=2 SV=2	1.065	0.073	6631251	7061503
GT251_MOUSE	Procollagen galactosyltransferase 1 OS=Mus musculus GN=Glt25d1 PE=1 SV=2	1.064	0.462	3.00935e+06	2.99499e+06
HNRPD_MOUSE	Isoform 2 of Heterogeneous nuclear ribonucleoprotein D0 OS=Mus musculus GN=Hnrnpd	1.062	0.026	10256376	10892974
RBM39_MOUSE	Isoform 2 of RNA-binding protein 39 OS=Mus musculus GN=Rbm39	1.06	0.426	1046014	1108776
OGT1_MOUSE	UDP-N-acetylglucosamine--peptide N-acetylglucosaminyltransferase 110 kDa subunit OS=Mus musculus GN=Ogt PE=1 SV=2	1.059	0.677	1.75571e+06	1.70087e+06
SRSF9_MOUSE	Serine/arginine-rich splicing factor 9 OS=Mus musculus GN=Srsf9 PE=1 SV=1	1.057	0.353	3.14029e+06	3.32093e+06
CHD8_MOUSE	Chromodomain-helicase-DNA-binding protein 8 OS=Mus musculus GN=Chd8 PE=1 SV=1	1.057	0.161	2977805	3.20181e+06
BRX1_MOUSE	Ribosome biogenesis protein BRX1 homolog OS=Mus musculus GN=Brix1 PE=2 SV=3	1.057	0.496	2.26502e+06	2.25214e+06
ZN592_MOUSE	Zinc finger protein 592 OS=Mus musculus GN=Znf592 PE=1 SV=3	1.056	0.833	482150	495606
TADBP_MOUSE	TAR DNA-binding protein 43 OS=Mus musculus GN=Tardbp PE=1 SV=1	1.055	0.272	5477813	5504486
VRK3_MOUSE	Inactive serine/threonine-protein kinase VRK3 OS=Mus musculus GN=Vrk3 PE=1 SV=2	1.055	0.514	767361	809421
RPN1_MOUSE	Dolichyl-diphosphooligosaccharide--protein glycosyltransferase subunit 1 OS=Mus musculus GN=Rpn1 PE=2 SV=1	1.054	0.206	6606459	6.94542e+06
GTR1_MOUSE	Solute carrier family 2, facilitated glucose transporter member 1 OS=Mus musculus GN=Slc2a1 PE=1 SV=3	1.054	0.296	5263281	5570013
CC021_MOUSE	Uncharacterized protein C3orf21 homolog OS=Mus musculus PE=2 SV=1	1.054	0.819	1.41153e+06	1.65312e+06
IF4A3_MOUSE	Eukaryotic initiation factor 4A-III OS=Mus musculus GN=Eif4a3 PE=1 SV=3	1.054	0.231	3.34141e+06	3534204
ANO6_MOUSE	Anoctamin-6 OS=Mus musculus GN=Ano6 PE=1 SV=1	1.052	0.569	1546507	1625158
SRSF7_MOUSE	Isoform 2 of Serine/arginine-rich splicing factor 7 OS=Mus musculus GN=Srsf7	1.052	0.481	2.726e+06	2.76087e+06
CCAR1_MOUSE	Cell division cycle and apoptosis regulator protein 1 OS=Mus musculus GN=Ccar1 PE=1 SV=1	1.051	0.368	14485217	14117637
TF2H2_MOUSE	General transcription factor IIH subunit 2 OS=Mus musculus GN=Gtf2h2 PE=1 SV=1	1.051	0.423	747010	779074
ZN143_MOUSE	Isoform 2 of Zinc finger protein 143 OS=Mus musculus GN=Znf143	1.05	0.487	1.30239e+06	1.27665e+06
SCC4_MOUSE	MAU2 chromatid cohesion factor homolog OS=Mus musculus GN=Mau2 PE=2 SV=3	1.05	0.477	1868896	1.82102e+06
MED15_MOUSE	Mediator of RNA polymerase II transcription subunit 15 OS=Mus musculus GN=Med15 PE=2 SV=2	1.049	0.507	2.78123e+06	2.95648e+06
ROD1_MOUSE	Regulator of differentiation 1 OS=Mus musculus GN=Rod1 PE=2 SV=1	1.047	0.594	807270	845710
WAPL_MOUSE	Wings apart-like protein homolog OS=Mus musculus GN=Wapal PE=1 SV=1	1.046	0.661	438370	461570
DIAP3_MOUSE	Protein diaphanous homolog 3 OS=Mus musculus GN=Diaph3 PE=2 SV=1	1.046	0.673	1.54138e+06	1.61255e+06
APC5_MOUSE	Anaphase-promoting complex subunit 5 OS=Mus musculus GN=Anapc5 PE=2 SV=1	1.046	0.808	408237	427490
ELF2_MOUSE	Isoform 1 of ETS-related transcription factor Elf-2 OS=Mus musculus GN=Elf2	1.046	0.214	6893548	7320901
T176A_MOUSE	Transmembrane protein 176A OS=Mus musculus GN=Tmem176a PE=2 SV=2	1.046	0.533	1.58e+06	1.65138e+06
JUND_MOUSE	Transcription factor jun-D OS=Mus musculus GN=Jund PE=1 SV=1	1.044	0.611	1.16206e+06	1.21322e+06
KDM1B_MOUSE	Isoform 2 of Lysine-specific histone demethylase 1B OS=Mus musculus GN=Kdm1b	1.044	0.712	395743	413130
CELF1_MOUSE	Isoform 2 of CUGBP Elav-like family member 1 OS=Mus musculus GN=Celf1	1.043	0.335	3403508	3551179
ZFAT_MOUSE	Zinc finger protein ZFAT OS=Mus musculus GN=Zfat PE=1 SV=2	1.043	0.153	6508795	6.75181e+06
NUPL1_MOUSE	Isoform 2 of Nucleoporin p58/p45 OS=Mus musculus GN=Nupl1	1.042	0.003	19231848	20193902
SIX4_MOUSE	Isoform 2 of Homeobox protein SIX4 OS=Mus musculus GN=Six4	1.042	0.246	3.96697e+06	4.13714e+06
SF3B3_MOUSE	Splicing factor 3B subunit 3 OS=Mus musculus GN=Sf3b3 PE=2 SV=1	1.042	0.528	6055999	6.12627e+06
ITA6_MOUSE	Integrin alpha-6 OS=Mus musculus GN=Itga6 PE=1 SV=2	1.041	0.709	1.40926e+06	1.30929e+06
NOL6_MOUSE	Nucleolar protein 6 OS=Mus musculus GN=Nol6 PE=2 SV=2	1.039	0.706	1.94278e+06	1.81758e+06
NVL_MOUSE	Nuclear valosin-containing protein-like OS=Mus musculus GN=Nvl PE=2 SV=1	1.039	0.723	1449669	1.50555e+06
RBM25_MOUSE	RNA-binding protein 25 OS=Mus musculus GN=Rbm25 PE=1 SV=1	1.039	0.158	3672542	3.90048e+06
JHD2C_MOUSE	Probable JmjC domain-containing histone demethylation protein 2C OS=Mus musculus GN=Jmjd1c PE=1 SV=2	1.039	0.441	3979148	4.14737e+06
PF21A_MOUSE	Isoform 3 of PHD finger protein 21A OS=Mus musculus GN=Phf21a	1.038	0.639	3.88672e+06	3976807
ITAL_MOUSE	Integrin alpha-L OS=Mus musculus GN=Itgal PE=1 SV=1	1.037	0.842	2.77459e+06	3.56129e+06
INT7_MOUSE	Integrator complex subunit 7 OS=Mus musculus GN=Ints7 PE=1 SV=1	1.036	0.407	2641444	2.73964e+06
RBBP4_MOUSE	Histone-binding protein RBBP4 OS=Mus musculus GN=Rbbp4 PE=1 SV=4	1.035	0.655	5625954	6165405
DNLI3_MOUSE	DNA ligase 3 OS=Mus musculus GN=Lig3 PE=1 SV=1	1.033	0.391	895992	924094
SIN3A_MOUSE	Paired amphipathic helix protein Sin3a OS=Mus musculus GN=Sin3a PE=1 SV=3	1.033	0.654	1.02332e+06	1.06139e+06
DPOE1_MOUSE	DNA polymerase epsilon catalytic subunit A OS=Mus musculus GN=Pole PE=2 SV=2	1.031	0.846	754461	759919
AAAS_MOUSE	Aladin OS=Mus musculus GN=Aaas PE=1 SV=1	1.031	0.414	3810938	3.93168e+06
GLCM_MOUSE	Glucosylceramidase OS=Mus musculus GN=Gba PE=1 SV=1	1.029	0.553	2644934	2.79787e+06
SMHD1_MOUSE	Structural maintenance of chromosomes flexible hinge domain-containing protein 1 OS=Mus musculus GN=Smchd1 PE=2 SV=2	1.029	0.758	2.11699e+06	2261051
MAZ_MOUSE	Myc-associated zinc finger protein OS=Mus musculus GN=Maz PE=1 SV=1	1.028	0.178	14294202	14658460
SMCA2_MOUSE	Probable global transcription activator SNF2L2 OS=Mus musculus GN=Smarca2 PE=1 SV=1	1.028	0.496	3956976	4.04352e+06
FOXP1_MOUSE	Forkhead box protein P1 OS=Mus musculus GN=Foxp1 PE=1 SV=1	1.028	0.453	5.07446e+06	5.25377e+06
BRD8_MOUSE	Bromodomain-containing protein 8 OS=Mus musculus GN=Brd8 PE=1 SV=2	1.027	0.653	1.80793e+06	1.94157e+06
PERE_MOUSE	Eosinophil peroxidase OS=Mus musculus GN=Epx PE=1 SV=1	1.027	0.593	940880	950912
NU214_MOUSE	Nuclear pore complex protein Nup214 OS=Mus musculus GN=Nup214 PE=1 SV=2	1.026	0.142	15498606	15959246
UBN1_MOUSE	Isoform 2 of Ubinuclein-1 OS=Mus musculus GN=Ubn1	1.024	0.829	2.27256e+06	2184355
UBP48_MOUSE	Isoform 2 of Ubiquitin carboxyl-terminal hydrolase 48 OS=Mus musculus GN=Usp48	1.023	0.766	484009	496742
MOCS3_MOUSE	Adenylyltransferase and sulfurtransferase MOCS3 OS=Mus musculus GN=Mocs3 PE=2 SV=1	1.023	0.548	3.45628e+06	3.48215e+06
RAD21_MOUSE	Double-strand-break repair protein rad21 homolog OS=Mus musculus GN=Rad21 PE=1 SV=2	1.023	0.893	1.23204e+06	1.16897e+06
P4R3A_MOUSE	Serine/threonine-protein phosphatase 4 regulatory subunit 3A OS=Mus musculus GN=Smek1 PE=1 SV=1	1.022	0.704	3.10674e+06	3.17453e+06
RBM14_MOUSE	RNA-binding protein 14 OS=Mus musculus GN=Rbm14 PE=1 SV=1	1.021	0.791	7366017	7.76129e+06
K0020_MOUSE	Pumilio domain-containing protein KIAA0020 OS=Mus musculus GN=Kiaa0020 PE=2 SV=2	1.021	0.738	1669371	1.62954e+06
THOC1_MOUSE	THO complex subunit 1 OS=Mus musculus GN=Thoc1 PE=1 SV=1	1.021	0.566	1.81743e+06	1.86509e+06
DIDO1_MOUSE	Death-inducer obliterator 1 OS=Mus musculus GN=Dido1 PE=1 SV=4	1.021	0.723	3.87393e+06	4.00334e+06
WDR46_MOUSE	WD repeat-containing protein 46 OS=Mus musculus GN=Wdr46 PE=2 SV=1	1.021	0.733	676747	686745
ICOSL_MOUSE	ICOS ligand OS=Mus musculus GN=Icoslg PE=1 SV=1	1.02	0.894	355381	362127
ZFR_MOUSE	Zinc finger RNA-binding protein OS=Mus musculus GN=Zfr PE=1 SV=2	1.019	0.362	12793880	12892406
RBBP7_MOUSE	Histone-binding protein RBBP7 OS=Mus musculus GN=Rbbp7 PE=1 SV=1	1.017	0.679	10396681	10548528
CSTF3_MOUSE	Cleavage stimulation factor subunit 3 OS=Mus musculus GN=Cstf3 PE=1 SV=1	1.016	0.85	998124	905992
ZC3HE_MOUSE	Isoform 2 of Zinc finger CCCH domain-containing protein 14 OS=Mus musculus GN=Zc3h14	1.014	0.76	2.96066e+06	3002279
RUNX1_MOUSE	Isoform 4 of Runt-related transcription factor 1 OS=Mus musculus GN=Runx1	1.014	0.863	12140206	11962189
YETS2_MOUSE	Isoform 3 of YEATS domain-containing protein 2 OS=Mus musculus GN=Yeats2	1.013	0.781	4.11353e+06	4186372
WDR3_MOUSE	WD repeat-containing protein 3 OS=Mus musculus GN=Wdr3 PE=2 SV=1	1.013	0.824	1.25641e+06	1.29085e+06
DX39A_MOUSE	ATP-dependent RNA helicase DDX39A OS=Mus musculus GN=Ddx39a PE=2 SV=1	1.013	0.661	4.02108e+06	4.08377e+06
CAF1A_MOUSE	Chromatin assembly factor 1 subunit A OS=Mus musculus GN=Chaf1a PE=1 SV=1	1.013	0.937	291388	294912
ERLN2_MOUSE	Erlin-2 OS=Mus musculus GN=Erlin2 PE=1 SV=1	1.012	0.779	2.02946e+06	1.97907e+06
GPHR_MOUSE	Golgi pH regulator OS=Mus musculus GN=Gpr89a PE=2 SV=2	1.011	0.9	618786	625782
CRLF2_MOUSE	Isoform 3 of Cytokine receptor-like factor 2 OS=Mus musculus GN=Crlf2	1.011	0.957	2.29683e+06	2.41196e+06
FKBP8_MOUSE	Peptidyl-prolyl cis-trans isomerase FKBP8 OS=Mus musculus GN=Fkbp8 PE=1 SV=2	1.011	0.906	1.60588e+06	1.54101e+06
FUS_MOUSE	RNA-binding protein FUS OS=Mus musculus GN=Fus PE=2 SV=1	1.01	0.848	10177739	10127423
EMSY_MOUSE	Isoform 3 of Protein EMSY OS=Mus musculus GN=Emsy	1.008	0.918	5166399	4986188
NCPR_MOUSE	NADPH--cytochrome P450 reductase OS=Mus musculus GN=Por PE=1 SV=2	1.008	0.966	3.59028e+06	3.74505e+06
MRP1_MOUSE	Multidrug resistance-associated protein 1 OS=Mus musculus GN=Abcc1 PE=1 SV=1	1.007	0.936	807691	782474
HNRLL_MOUSE	Heterogeneous nuclear ribonucleoprotein L-like OS=Mus musculus GN=Hnrpll PE=1 SV=3	1.007	0.946	460253	468995
FA48A_MOUSE	Isoform 2 of Protein FAM48A OS=Mus musculus GN=Fam48a	1.006	0.963	1.23147e+06	1.2283e+06
RUNX2_MOUSE	Isoform 6 of Runt-related transcription factor 2 OS=Mus musculus GN=Runx2	1.006	0.871	3.22621e+06	3.2651e+06
K1310_MOUSE	Isoform 2 of Uncharacterized protein KIAA1310 OS=Mus musculus GN=Kiaa1310	1.005	0.902	3127573	3.23138e+06
PRP6_MOUSE	Pre-mRNA-processing factor 6 OS=Mus musculus GN=Prpf6 PE=2 SV=1	1.005	0.972	2.03273e+06	2.11398e+06
LMBD1_MOUSE	Isoform 2 of Probable lysosomal cobalamin transporter OS=Mus musculus GN=Lmbrd1	1.005	0.987	1.27222e+06	958008
MINT_MOUSE	Isoform 2 of Msx2-interacting protein OS=Mus musculus GN=Spen	1.005	0.97	4.50678e+06	4.70937e+06
NRF1_MOUSE	Nuclear respiratory factor 1 OS=Mus musculus GN=Nrf1 PE=2 SV=1	1.003	0.952	3.19807e+06	3.26522e+06
GAR1_MOUSE	Isoform 2 of H/ACA ribonucleoprotein complex subunit 1 OS=Mus musculus GN=Gar1	1.002	0.969	3.81852e+06	3.65906e+06
NOG1_MOUSE	Nucleolar GTP-binding protein 1 OS=Mus musculus GN=Gtpbp4 PE=2 SV=3	1.001	0.98	4.09573e+06	4.1625e+06
ACSL4_MOUSE	Long-chain-fatty-acid--CoA ligase 4 OS=Mus musculus GN=Acsl4 PE=2 SV=1	1.001	0.995	430581	475402
HCFC1_MOUSE	Host cell factor 1 OS=Mus musculus GN=Hcfc1 PE=1 SV=1	-1	0.999	26339450	26256272
LGMN_MOUSE	Legumain OS=Mus musculus GN=Lgmn PE=1 SV=1	-1.001	0.995	791657	790365
ILF2_MOUSE	Interleukin enhancer-binding factor 2 OS=Mus musculus GN=Ilf2 PE=1 SV=1	-1.001	0.974	2625145	2639556
ZN148_MOUSE	Zinc finger protein 148 OS=Mus musculus GN=Znf148 PE=1 SV=2	-1.003	0.971	1073890	1057903
TAP1_MOUSE	Antigen peptide transporter 1 OS=Mus musculus GN=Tap1 PE=2 SV=2	-1.003	0.988	266120	265116
AP2B_MOUSE	Transcription factor AP-2-beta OS=Mus musculus GN=Tfap2b PE=1 SV=2	-1.005	0.971	4951742	4.65643e+06
LAT1_MOUSE	Large neutral amino acids transporter small subunit 1 OS=Mus musculus GN=Slc7a5 PE=1 SV=1	-1.006	0.907	7.88842e+06	7874582
NU133_MOUSE	Nuclear pore complex protein Nup133 OS=Mus musculus GN=Nup133 PE=1 SV=1	-1.006	0.879	1.16076e+06	1.17765e+06
ERG28_MOUSE	Probable ergosterol biosynthetic protein 28 OS=Mus musculus GN=ORF11 PE=2 SV=1	-1.006	0.96	2.9971e+06	2.98449e+06
TOP1_MOUSE	DNA topoisomerase 1 OS=Mus musculus GN=Top1 PE=1 SV=2	-1.006	0.91	5.43941e+06	5143685
CBX3_MOUSE	Chromobox protein homolog 3 OS=Mus musculus GN=Cbx3 PE=1 SV=2	-1.006	0.892	6.34375e+06	6312320
NUP43_MOUSE	Nucleoporin Nup43 OS=Mus musculus GN=Nup43 PE=2 SV=1	-1.007	0.849	4.08898e+06	4.03123e+06
MBB1A_MOUSE	Myb-binding protein 1A OS=Mus musculus GN=Mybbp1a PE=1 SV=2	-1.009	0.913	5.75084e+06	6306458
EPC2_MOUSE	Enhancer of polycomb homolog 2 OS=Mus musculus GN=Epc2 PE=2 SV=2	-1.009	0.946	224941	222831
MED25_MOUSE	Isoform 2 of Mediator of RNA polymerase II transcription subunit 25 OS=Mus musculus GN=Med25	-1.009	0.741	4787281	4.73009e+06
SRBD1_MOUSE	S1 RNA-binding domain-containing protein 1 OS=Mus musculus GN=Srbd1 PE=1 SV=2	-1.01	0.95	925780	1.02735e+06
RU1C_MOUSE	U1 small nuclear ribonucleoprotein C OS=Mus musculus GN=Snrpc PE=2 SV=1	-1.01	0.924	8932637	8833960
RFX2_MOUSE	Isoform 2 of DNA-binding protein RFX2 OS=Mus musculus GN=Rfx2	-1.011	0.908	897119	898821
CREB1_MOUSE	Cyclic AMP-responsive element-binding protein 1 OS=Mus musculus GN=Creb1 PE=1 SV=1	-1.011	0.648	9319027	9189040
NOC2L_MOUSE	Nucleolar complex protein 2 homolog OS=Mus musculus GN=Noc2l PE=1 SV=2	-1.012	0.772	3.40404e+06	3.40955e+06
CF089_MOUSE	Uncharacterized protein C6orf89 homolog OS=Mus musculus PE=2 SV=2	-1.012	0.911	580475	573237
ROAA_MOUSE	Heterogeneous nuclear ribonucleoprotein A/B OS=Mus musculus GN=Hnrnpab PE=1 SV=1	-1.013	0.773	5238398	5.02252e+06
NONO_MOUSE	Non-POU domain-containing octamer-binding protein OS=Mus musculus GN=Nono PE=1 SV=3	-1.014	0.866	7.24136e+06	7.34241e+06
FCERG_MOUSE	High affinity immunoglobulin epsilon receptor subunit gamma OS=Mus musculus GN=Fcer1g PE=1 SV=1	-1.014	0.879	2.46204e+06	2.41739e+06
DDX18_MOUSE	ATP-dependent RNA helicase DDX18 OS=Mus musculus GN=Ddx18 PE=2 SV=1	-1.014	0.658	1.14383e+06	1.1248e+06
RM41_MOUSE	39S ribosomal protein L41, mitochondrial OS=Mus musculus GN=Mrpl41 PE=2 SV=1	-1.014	0.796	1.99054e+06	1.96207e+06
ATF1_MOUSE	Cyclic AMP-dependent transcription factor ATF-1 OS=Mus musculus GN=Atf1 PE=2 SV=1	-1.016	0.674	41572028	40138152
NHP2_MOUSE	H/ACA ribonucleoprotein complex subunit 2 OS=Mus musculus GN=Nhp2 PE=2 SV=1	-1.016	0.719	4813032	5235186
LAP2A_MOUSE	Lamina-associated polypeptide 2, isoforms alpha/zeta OS=Mus musculus GN=Tmpo PE=1 SV=3	-1.017	0.91	807359	710846
FUBP2_MOUSE	Far upstream element-binding protein 2 OS=Mus musculus GN=Khsrp PE=1 SV=1	-1.018	0.623	4.11863e+06	4040447
SON_MOUSE	Protein SON OS=Mus musculus GN=Son PE=1 SV=1	-1.018	0.786	4.08137e+06	4.00321e+06
NSD2_MOUSE	Isoform 2 of Probable histone-lysine N-methyltransferase NSD2 OS=Mus musculus GN=Whsc1	-1.019	0.799	1.0128e+06	1.00575e+06
ALG9_MOUSE	Alpha-1,2-mannosyltransferase ALG9 OS=Mus musculus GN=Alg9 PE=2 SV=1	-1.02	0.833	1.65833e+06	1.55289e+06
HNRPM_MOUSE	Heterogeneous nuclear ribonucleoprotein M OS=Mus musculus GN=Hnrnpm PE=1 SV=3	-1.021	0.674	6060853	5.95711e+06
THOC2_MOUSE	THO complex subunit 2 OS=Mus musculus GN=Thoc2 PE=3 SV=1	-1.021	0.892	1.69146e+06	1470260
YLPM1_MOUSE	YLP motif-containing protein 1 OS=Mus musculus GN=Ylpm1 PE=2 SV=2	-1.021	0.659	2795560	2.75278e+06
P66B_MOUSE	Transcriptional repressor p66-beta OS=Mus musculus GN=Gatad2b PE=1 SV=1	-1.021	0.392	20667550	20075596
MPU1_MOUSE	Mannose-P-dolichol utilization defect 1 protein OS=Mus musculus GN=Mpdu1 PE=2 SV=1	-1.023	0.754	1.01169e+06	989376
CDK19_MOUSE	Cyclin-dependent kinase 19 OS=Mus musculus GN=Cdk19 PE=2 SV=1	-1.023	0.767	5622921	5485903
ROA1_MOUSE	Heterogeneous nuclear ribonucleoprotein A1 OS=Mus musculus GN=Hnrnpa1 PE=1 SV=2	-1.023	0.487	15417558	14999364
ELAV1_MOUSE	ELAV-like protein 1 OS=Mus musculus GN=Elavl1 PE=1 SV=1	-1.024	0.362	11195261	10786806
SIDT2_MOUSE	SID1 transmembrane family member 2 OS=Mus musculus GN=Sidt2 PE=1 SV=1	-1.024	0.704	1268042	1.23799e+06
MATR3_MOUSE	Matrin-3 OS=Mus musculus GN=Matr3 PE=1 SV=1	-1.024	0.637	3573785	3.49145e+06
WIZ_MOUSE	Isoform S of Protein Wiz OS=Mus musculus GN=Wiz	-1.025	0.777	1.07359e+06	1.03829e+06
INT9_MOUSE	Integrator complex subunit 9 OS=Mus musculus GN=Ints9 PE=2 SV=1	-1.025	0.765	1.04065e+06	1.01484e+06
FOSL2_MOUSE	Fos-related antigen 2 OS=Mus musculus GN=Fosl2 PE=2 SV=1	-1.026	0.737	4.10219e+06	3.81724e+06
BYST_MOUSE	Bystin OS=Mus musculus GN=Bysl PE=1 SV=3	-1.027	0.863	635490	617409
ZFX_MOUSE	Zinc finger autosomal protein OS=Mus musculus GN=Zfa PE=2 SV=1	-1.028	0.731	2.65891e+06	2.58585e+06
KDM4B_MOUSE	Lysine-specific demethylase 4B OS=Mus musculus GN=Kdm4b PE=1 SV=1	-1.028	0.797	711557	692025
RPRD2_MOUSE	Regulation of nuclear pre-mRNA domain-containing protein 2 OS=Mus musculus GN=Rprd2 PE=1 SV=1	-1.029	0.737	3462559	3.36898e+06
PR40A_MOUSE	Pre-mRNA-processing factor 40 homolog A OS=Mus musculus GN=Prpf40a PE=1 SV=1	-1.029	0.631	5875198	5893027
NU155_MOUSE	Nuclear pore complex protein Nup155 OS=Mus musculus GN=Nup155 PE=1 SV=1	-1.029	0.657	2.11604e+06	2.09943e+06
SMC1A_MOUSE	Structural maintenance of chromosomes protein 1A OS=Mus musculus GN=Smc1a PE=1 SV=3	-1.03	0.823	1.29232e+06	1.26311e+06
CG026_MOUSE	Uncharacterized protein C7orf26 homolog OS=Mus musculus PE=2 SV=1	-1.03	0.892	251754	243812
U2AF2_MOUSE	Splicing factor U2AF 65 kDa subunit OS=Mus musculus GN=U2af2 PE=1 SV=3	-1.031	0.373	3044501	3.02705e+06
ADNP2_MOUSE	ADNP homeobox protein 2 OS=Mus musculus GN=Adnp2 PE=2 SV=2	-1.032	0.376	4.57715e+06	4487280
CIR1A_MOUSE	Cirhin OS=Mus musculus GN=Cirh1a PE=2 SV=3	-1.032	0.622	2.81181e+06	2.64748e+06
DDX52_MOUSE	Probable ATP-dependent RNA helicase DDX52 OS=Mus musculus GN=Ddx52 PE=2 SV=1	-1.032	0.823	820966	791651
INT8_MOUSE	Integrator complex subunit 8 OS=Mus musculus GN=Ints8 PE=2 SV=1	-1.032	0.605	950216	933213
NUP88_MOUSE	Isoform 2 of Nuclear pore complex protein Nup88 OS=Mus musculus GN=Nup88	-1.033	0.749	2.56745e+06	2.38234e+06
GLE1_MOUSE	Nucleoporin GLE1 OS=Mus musculus GN=Gle1 PE=2 SV=2	-1.033	0.849	177930	172290
PIGB_MOUSE	GPI mannosyltransferase 3 OS=Mus musculus GN=Pigb PE=1 SV=2	-1.033	0.731	2.1454e+06	2.07598e+06
ZN326_MOUSE	Zinc finger protein 326 OS=Mus musculus GN=Znf326 PE=1 SV=1	-1.033	0.576	1.53522e+06	1.48611e+06
RBP2_MOUSE	E3 SUMO-protein ligase RanBP2 OS=Mus musculus GN=Ranbp2 PE=1 SV=1	-1.033	0.208	5587647	5433582
RFX1_MOUSE	MHC class II regulatory factor RFX1 OS=Mus musculus GN=Rfx1 PE=2 SV=1	-1.034	0.499	3.69847e+06	4004413
EPIPL_MOUSE	Epiplakin OS=Mus musculus GN=Eppk1 PE=1 SV=2	-1.035	0.597	1776896	1.71674e+06
Z280C_MOUSE	Zinc finger protein 280C OS=Mus musculus GN=Znf280c PE=2 SV=1	-1.035	0.459	4.11412e+06	3.86231e+06
MAFK_MOUSE	Transcription factor MafK OS=Mus musculus GN=Mafk PE=2 SV=1	-1.037	0.174	11661952	11303485
NEUA_MOUSE	N-acylneuraminate cytidylyltransferase OS=Mus musculus GN=Cmas PE=1 SV=2	-1.037	0.784	2.50145e+06	2535861
MED23_MOUSE	Isoform 2 of Mediator of RNA polymerase II transcription subunit 23 OS=Mus musculus GN=Med23	-1.041	0.222	2.409e+06	2.31984e+06
KHDR1_MOUSE	KH domain-containing, RNA-binding, signal transduction-associated protein 1 OS=Mus musculus GN=Khdrbs1 PE=1 SV=2	-1.041	0.582	4.20919e+06	4.04206e+06
SMRC2_MOUSE	SWI/SNF complex subunit SMARCC2 OS=Mus musculus GN=Smarcc2 PE=1 SV=2	-1.042	0.229	8062988	7.66793e+06
UST_MOUSE	Uronyl 2-sulfotransferase OS=Mus musculus GN=Ust PE=2 SV=3	-1.042	0.526	2.39469e+06	2.29736e+06
TXND5_MOUSE	Thioredoxin domain-containing protein 5 OS=Mus musculus GN=Txndc5 PE=1 SV=2	-1.042	0.771	776719	722479
ADCY4_MOUSE	Adenylate cyclase type 4 OS=Mus musculus GN=Adcy4 PE=1 SV=1	-1.043	0.321	5.1865e+06	4.97451e+06
INT11_MOUSE	Integrator complex subunit 11 OS=Mus musculus GN=Cpsf3l PE=2 SV=1	-1.043	0.391	1.9435e+06	1.86343e+06
ADA17_MOUSE	Disintegrin and metalloproteinase domain-containing protein 17 OS=Mus musculus GN=Adam17 PE=1 SV=2	-1.043	0.662	2296562	2.00839e+06
STAG2_MOUSE	Cohesin subunit SA-2 OS=Mus musculus GN=Stag2 PE=1 SV=2	-1.044	0.488	3036780	2907774
NUP85_MOUSE	Nuclear pore complex protein Nup85 OS=Mus musculus GN=Nup85 PE=1 SV=1	-1.045	0.377	3825116	3.6511e+06
MGAP_MOUSE	Isoform 2 of MAX gene-associated protein OS=Mus musculus GN=Mga	-1.045	0.754	1.6137e+06	1.32526e+06
TCF23_MOUSE	Transcription factor 23 OS=Mus musculus GN=Tcf23 PE=1 SV=1	-1.045	0.048	42870896	41013316
TRRAP_MOUSE	Transformation/transcription domain-associated protein OS=Mus musculus GN=Trrap PE=1 SV=2	-1.046	0.383	1.87243e+06	1.81638e+06
DEGS1_MOUSE	Sphingolipid delta(4)-desaturase DES1 OS=Mus musculus GN=Degs1 PE=2 SV=1	-1.046	0.646	2.0931e+06	2.00037e+06
NOP14_MOUSE	Nucleolar protein 14 OS=Mus musculus GN=Nop14 PE=1 SV=1	-1.046	0.526	1.01822e+06	964862
ELF1_MOUSE	ETS-related transcription factor Elf-1 OS=Mus musculus GN=Elf1 PE=2 SV=1	-1.046	0.193	11074358	10696045
GXLT1_MOUSE	Glucoside xylosyltransferase 1 OS=Mus musculus GN=Gxylt1 PE=1 SV=2	-1.047	0.605	582274	556318
PCGF2_MOUSE	Polycomb complex protein BMI-1 OS=Mus musculus GN=Bmi1 PE=1 SV=1	-1.047	0.521	1.27872e+06	1.22151e+06
ARI1A_MOUSE	AT-rich interactive domain-containing protein 1A OS=Mus musculus GN=Arid1a PE=1 SV=1	-1.047	0.145	7.75373e+06	7.46936e+06
CTSL2_MOUSE	Isoform 2 of CTD small phosphatase-like protein 2 OS=Mus musculus GN=Ctdspl2	-1.047	0.816	495041	471450
HDAC1_MOUSE	Histone deacetylase 1 OS=Mus musculus GN=Hdac1 PE=1 SV=1	-1.047	0.271	6.39398e+06	6.13152e+06
EP400_MOUSE	Isoform 3 of E1A-binding protein p400 OS=Mus musculus GN=Ep400	-1.047	0.238	6.82536e+06	6.55625e+06
ZN687_MOUSE	Isoform 2 of Zinc finger protein 687 OS=Mus musculus GN=Znf687	-1.048	0.53	2095536	1.99784e+06
PWP2_MOUSE	Periodic tryptophan protein 2 homolog OS=Mus musculus GN=Pwp2 PE=1 SV=1	-1.049	0.568	3.03451e+06	3.163e+06
RALY_MOUSE	RNA-binding protein Raly OS=Mus musculus GN=Raly PE=1 SV=2	-1.049	0.354	2.55893e+06	2.38466e+06
HELLS_MOUSE	Lymphocyte-specific helicase OS=Mus musculus GN=Hells PE=1 SV=2	-1.049	0.403	3.52369e+06	3.35871e+06
TAF6_MOUSE	Transcription initiation factor TFIID subunit 6 OS=Mus musculus GN=Taf6 PE=2 SV=1	-1.05	0.422	8436609	7844742
TOX4_MOUSE	TOX high mobility group box family member 4 OS=Mus musculus GN=Tox4 PE=1 SV=2	-1.05	0.147	11751457	11155294
AURKB_MOUSE	Serine/threonine-protein kinase 12 OS=Mus musculus GN=Aurkb PE=1 SV=1	-1.05	0.607	898009	854888
NXF1_MOUSE	Nuclear RNA export factor 1 OS=Mus musculus GN=Nxf1 PE=1 SV=2	-1.051	0.342	966378	899372
FBRL_MOUSE	rRNA 2'-O-methyltransferase fibrillarin OS=Mus musculus GN=Fbl PE=1 SV=2	-1.051	0.063	8215631	7.67645e+06
ZN828_MOUSE	Zinc finger protein 828 OS=Mus musculus GN=Znf828 PE=1 SV=1	-1.053	0.28	1307658	1.24064e+06
SIA4C_MOUSE	CMP-N-acetylneuraminate-beta-galactosamide-alpha-2,3-sialyltransferase 4 OS=Mus musculus GN=St3gal4 PE=2 SV=1	-1.053	0.745	1.51442e+06	1436762
INT2_MOUSE	Integrator complex subunit 2 OS=Mus musculus GN=Ints2 PE=2 SV=2	-1.053	0.353	1.6703e+06	1.55065e+06
THOC6_MOUSE	THO complex subunit 6 homolog OS=Mus musculus GN=Thoc6 PE=2 SV=1	-1.053	0.313	1.16143e+06	1105184
MLL1_MOUSE	Histone-lysine N-methyltransferase MLL OS=Mus musculus GN=Mll PE=2 SV=2	-1.054	0.178	2606990	2.50563e+06
LCA5_MOUSE	Lebercilin OS=Mus musculus GN=Lca5 PE=2 SV=1	-1.054	0.631	8087125	7.61881e+06
GATA1_MOUSE	Erythroid transcription factor OS=Mus musculus GN=Gata1 PE=1 SV=1	-1.055	0.177	4206327	3.88197e+06
SUMO2_MOUSE	Small ubiquitin-related modifier 2 OS=Mus musculus GN=Sumo2 PE=2 SV=1	-1.056	0.529	14643024	15078300
NUFP2_MOUSE	Nuclear fragile X mental retardation-interacting protein 2 OS=Mus musculus GN=Nufip2 PE=1 SV=1	-1.056	0.701	4.15069e+06	4496161
PDS5A_MOUSE	Sister chromatid cohesion protein PDS5 homolog A OS=Mus musculus GN=Pds5a PE=2 SV=2	-1.056	0.491	4287248	4192083
ITAV_MOUSE	Integrin alpha-V OS=Mus musculus GN=Itgav PE=1 SV=1	-1.057	0.437	715977	671026
RUNX3_MOUSE	Runt-related transcription factor 3 OS=Mus musculus GN=Runx3 PE=2 SV=2	-1.057	0.543	5548717	5503845
CXXC1_MOUSE	CpG-binding protein OS=Mus musculus GN=Cxxc1 PE=2 SV=1	-1.058	0.558	2.20985e+06	1.97618e+06
DNMT1_MOUSE	DNA (cytosine-5)-methyltransferase 1 OS=Mus musculus GN=Dnmt1 PE=1 SV=5	-1.059	0.033	5978183	5641530
PO121_MOUSE	Nuclear envelope pore membrane protein POM 121 OS=Mus musculus GN=Pom121 PE=1 SV=2	-1.06	0.199	8392614	7.87059e+06
M89BB_MOUSE	Cell cycle regulator Mat89Bb homolog OS=Mus musculus PE=2 SV=1	-1.06	0.315	1567202	1474987
MTF2_MOUSE	Metal-response element-binding transcription factor 2 OS=Mus musculus GN=Mtf2 PE=1 SV=2	-1.06	0.581	1366964	1.28786e+06
TM209_MOUSE	Isoform 2 of Transmembrane protein 209 OS=Mus musculus GN=Tmem209	-1.06	0.469	1.40125e+06	1322301
ENPP4_MOUSE	Ectonucleotide pyrophosphatase/phosphodiesterase family member 4 OS=Mus musculus GN=Enpp4 PE=1 SV=1	-1.06	0.662	731763	689588
H2A1F_MOUSE	Histone H2A type 1 OS=Mus musculus GN=Hist1h2ab PE=1 SV=3	-1.061	0.276	17167044	15913278
MBD3_MOUSE	Methyl-CpG-binding domain protein 3 OS=Mus musculus GN=Mbd3 PE=1 SV=1	-1.061	0.7	481966	453998
NDC1_MOUSE	Nucleoporin NDC1 OS=Mus musculus GN=Tmem48 PE=1 SV=1	-1.061	0.565	4960680	4734281
FEN1_MOUSE	Flap endonuclease 1 OS=Mus musculus GN=Fen1 PE=1 SV=1	-1.062	0.611	5.61881e+06	5.72916e+06
PAXI1_MOUSE	PAX-interacting protein 1 OS=Mus musculus GN=Paxip1 PE=1 SV=1	-1.063	0.57	712302	670185
PADI4_MOUSE	Protein-arginine deiminase type-4 OS=Mus musculus GN=Padi4 PE=2 SV=2	-1.063	0.221	5.16072e+06	4772690
CA103_MOUSE	Uncharacterized protein C1orf103 homolog OS=Mus musculus PE=2 SV=2	-1.064	0.432	1.89188e+06	1759808
RAVR1_MOUSE	Ribonucleoprotein PTB-binding 1 OS=Mus musculus GN=Raver1 PE=1 SV=2	-1.064	0.328	2.11772e+06	1.98986e+06
APC1_MOUSE	Anaphase-promoting complex subunit 1 OS=Mus musculus GN=Anapc1 PE=1 SV=1	-1.065	0.708	465657	436642
RAI1_MOUSE	Retinoic acid-induced protein 1 OS=Mus musculus GN=Rai1 PE=1 SV=2	-1.065	0.569	2646329	2.59067e+06
TAF10_MOUSE	Transcription initiation factor TFIID subunit 10 OS=Mus musculus GN=Taf10 PE=1 SV=1	-1.066	0.562	1.27352e+06	1193426
RRMJ3_MOUSE	Putative rRNA methyltransferase 3 OS=Mus musculus GN=Ftsj3 PE=1 SV=1	-1.068	0.56	509629	463057
DCA13_MOUSE	DDB1- and CUL4-associated factor 13 OS=Mus musculus GN=Dcaf13 PE=2 SV=1	-1.069	0.515	319760	299334
MTA1_MOUSE	Metastasis-associated protein MTA1 OS=Mus musculus GN=Mta1 PE=1 SV=1	-1.069	0.115	4214513	3.99878e+06
MDC1_MOUSE	Mediator of DNA damage checkpoint protein 1 OS=Mus musculus GN=Mdc1 PE=1 SV=1	-1.069	0.45	564696	528302
HNRL2_MOUSE	Heterogeneous nuclear ribonucleoprotein U-like protein 2 OS=Mus musculus GN=Hnrnpul2 PE=1 SV=1	-1.069	0.165	1.4702e+06	1.37518e+06
MCM3A_MOUSE	80 kDa MCM3-associated protein OS=Mus musculus GN=Mcm3ap PE=2 SV=1	-1.069	0.191	2.328e+06	2220557
INT1_MOUSE	Integrator complex subunit 1 OS=Mus musculus GN=Ints1 PE=1 SV=2	-1.07	0.299	802510	763034
VRK1_MOUSE	Isoform 2 of Serine/threonine-protein kinase VRK1 OS=Mus musculus GN=Vrk1	-1.071	0.434	3168950	3.14946e+06
H2AX_MOUSE	Histone H2A.x OS=Mus musculus GN=H2afx PE=1 SV=2	-1.072	0.058	2.82197e+06	2.58441e+06
KDM2A_MOUSE	Lysine-specific demethylase 2A OS=Mus musculus GN=Kdm2a PE=1 SV=2	-1.073	0.101	2.20181e+06	2.04281e+06
PO2F1_MOUSE	Isoform 4 of POU domain, class 2, transcription factor 1 OS=Mus musculus GN=Pou2f1	-1.073	0.003	10017409	9311333
K0240_MOUSE	Uncharacterized protein KIAA0240 OS=Mus musculus GN=Kiaa0240 PE=2 SV=2	-1.073	0.031	1.82036e+06	1687971
TAF6L_MOUSE	TAF6-like RNA polymerase II p300/CBP-associated factor-associated factor 65 kDa subunit 6L OS=Mus musculus GN=Taf6l PE=2 SV=1	-1.073	0.736	219857	204672
INT4_MOUSE	Integrator complex subunit 4 OS=Mus musculus GN=Ints4 PE=2 SV=1	-1.074	0.199	692095	641572
LIN54_MOUSE	Protein lin-54 homolog OS=Mus musculus GN=Lin54 PE=2 SV=2	-1.075	0.008	6.04241e+06	5.51578e+06
SMCA5_MOUSE	SWI/SNF-related matrix-associated actin-dependent regulator of chromatin subfamily A member 5 OS=Mus musculus GN=Smarca5 PE=1 SV=1	-1.075	0.096	5.93367e+06	5.49413e+06
LMNB1_MOUSE	Lamin-B1 OS=Mus musculus GN=Lmnb1 PE=1 SV=3	-1.076	0.152	3.70841e+06	3.40961e+06
ORC3_MOUSE	Origin recognition complex subunit 3 OS=Mus musculus GN=Orc3 PE=1 SV=1	-1.077	0.025	1.94288e+06	1.82559e+06
RAE1L_MOUSE	mRNA export factor OS=Mus musculus GN=Rae1 PE=1 SV=1	-1.077	0.095	4.58965e+06	4.18965e+06
TOP2B_MOUSE	DNA topoisomerase 2-beta OS=Mus musculus GN=Top2b PE=1 SV=2	-1.08	0.36	3038939	2.73916e+06
DHX9_MOUSE	Isoform 2 of ATP-dependent RNA helicase A OS=Mus musculus GN=Dhx9	-1.081	0.066	8575062	7935745
CAF1B_MOUSE	Chromatin assembly factor 1 subunit B OS=Mus musculus GN=Chaf1b PE=2 SV=1	-1.081	0.693	136254	126020
MTA3_MOUSE	Isoform 2 of Metastasis-associated protein MTA3 OS=Mus musculus GN=Mta3	-1.081	0.254	7022307	6279993
HA13_MOUSE	H-2 class I histocompatibility antigen, D-K alpha chain OS=Mus musculus GN=H2-D1 PE=1 SV=1	-1.081	0.007	17296318	15893872
PHC1_MOUSE	Isoform 3 of Polyhomeotic-like protein 1 OS=Mus musculus GN=Phc1	-1.081	0.185	4904249	4422520
MNT_MOUSE	Max-binding protein MNT OS=Mus musculus GN=Mnt PE=2 SV=1	-1.083	0.515	3.3367e+06	3081078
CTCF_MOUSE	Transcriptional repressor CTCF OS=Mus musculus GN=Ctcf PE=1 SV=2	-1.083	0.05	4347735	4.01763e+06
ROA3_MOUSE	Heterogeneous nuclear ribonucleoprotein A3 OS=Mus musculus GN=Hnrnpa3 PE=1 SV=1	-1.083	8.783e-06	16573086	15361675
TBL3_MOUSE	Transducin beta-like protein 3 OS=Mus musculus GN=Tbl3 PE=2 SV=1	-1.084	0.199	3.12916e+06	2.8258e+06
SP1_MOUSE	Transcription factor Sp1 OS=Mus musculus GN=Sp1 PE=1 SV=2	-1.084	0.034	14875400	13634004
PDS5B_MOUSE	Isoform 3 of Sister chromatid cohesion protein PDS5 homolog B OS=Mus musculus GN=Pds5b	-1.086	0.193	4846897	4452751
UTP6_MOUSE	U3 small nucleolar RNA-associated protein 6 homolog OS=Mus musculus GN=Utp6 PE=1 SV=1	-1.086	0.334	1.94415e+06	1.79014e+06
ARPC3_MOUSE	Actin-related protein 2/3 complex subunit 3 OS=Mus musculus GN=Arpc3 PE=1 SV=3	-1.086	0.155	2985480	2748346
NOP58_MOUSE	Nucleolar protein 58 OS=Mus musculus GN=Nop58 PE=1 SV=1	-1.086	0.069	4978641	4.54712e+06
HNRPL_MOUSE	Heterogeneous nuclear ribonucleoprotein L OS=Mus musculus GN=Hnrnpl PE=1 SV=2	-1.087	0.0003923	27737964	25406006
NOP56_MOUSE	Nucleolar protein 56 OS=Mus musculus GN=Nop56 PE=1 SV=2	-1.088	0.006	5546642	5.16091e+06
HDAC2_MOUSE	Histone deacetylase 2 OS=Mus musculus GN=Hdac2 PE=1 SV=1	-1.089	0.153	3351372	3.059e+06
SUZ12_MOUSE	Polycomb protein Suz12 OS=Mus musculus GN=Suz12 PE=1 SV=2	-1.089	0.196	2.34509e+06	2.17554e+06
BRD7_MOUSE	Bromodomain-containing protein 7 OS=Mus musculus GN=Brd7 PE=1 SV=1	-1.09	0.314	441152	406329
[truncated: 272 more rows]

## Sheet: 18939 Cytoplasm
Primary Protein Name	Protein Description	Fold Change	P-value	Intensity1	Intensity2
[truncated: 1,262 more rows]

[truncated: 2 more sheets: Nuclear filtered, Cytoplasmic Filtered]
